# Supplementary material for: Chromatin accessibility landscape of stromal subpopulations reveals distinct metabolic and inflammatory features of porcine subcutaneous and visceral adipose tissue
Source: PeerJ journal article supplement (doi:10.7717/peerj.13250), 2022-05-24

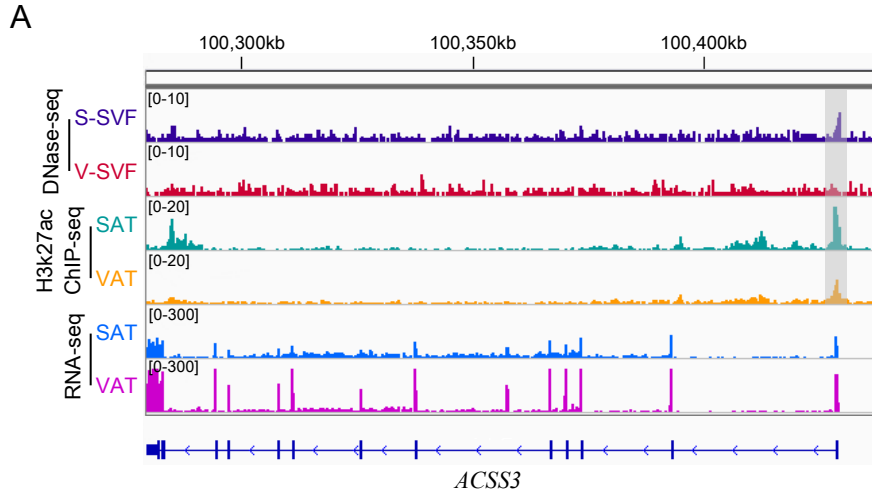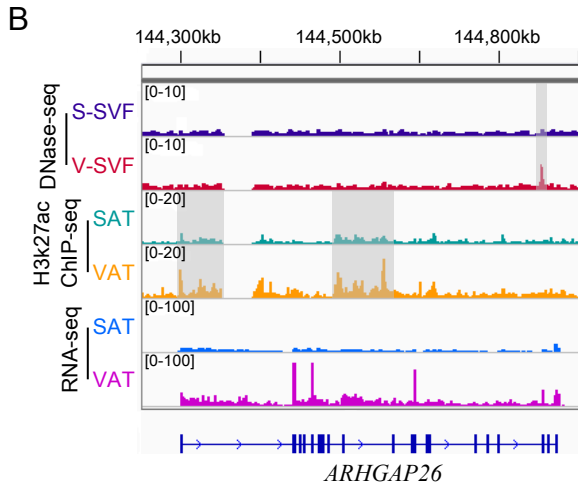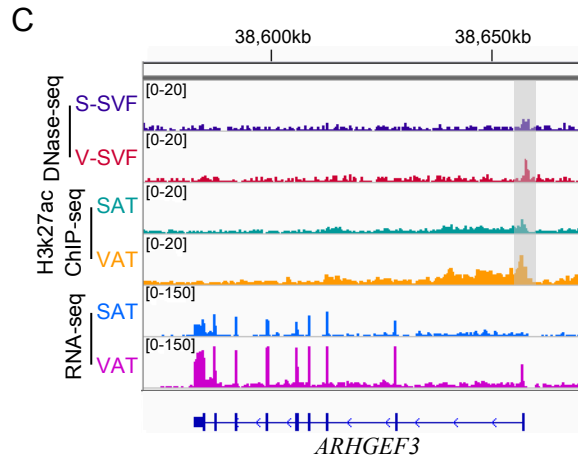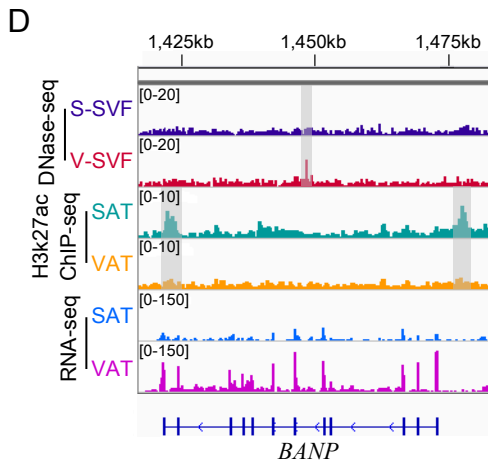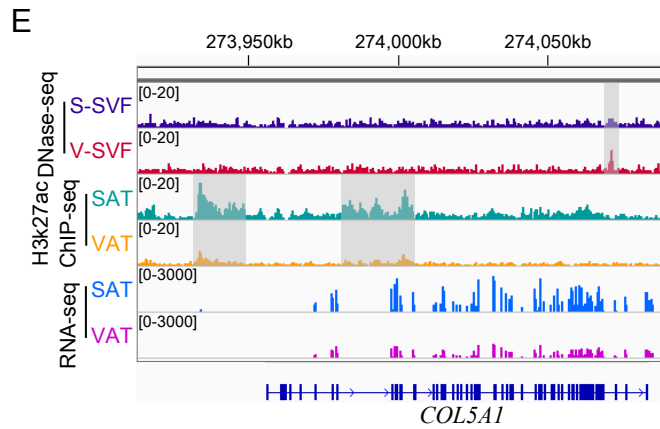

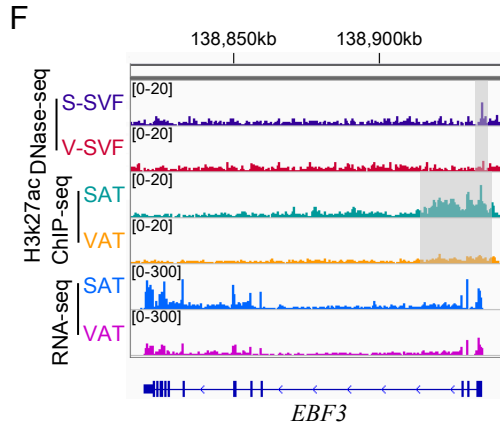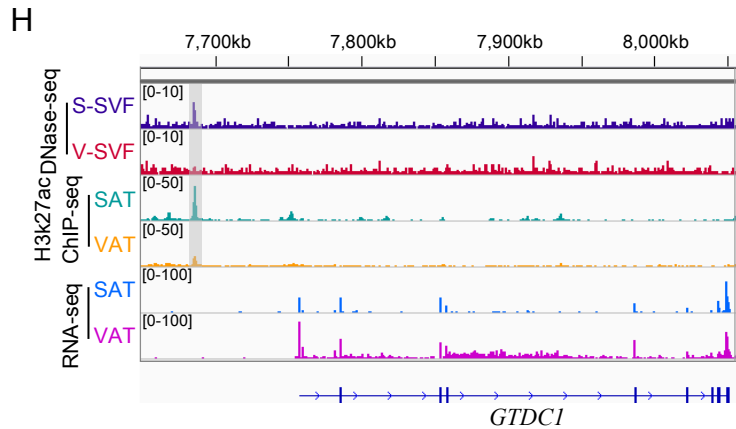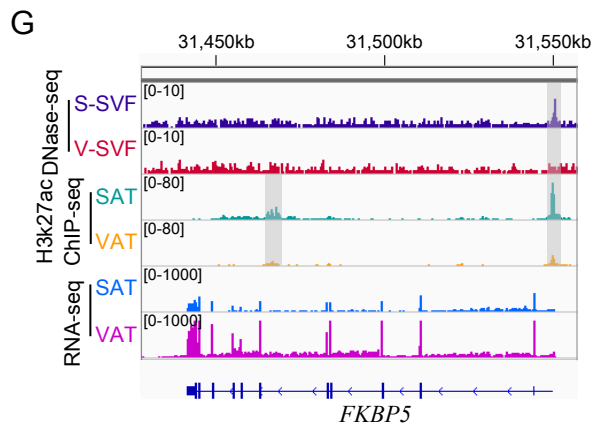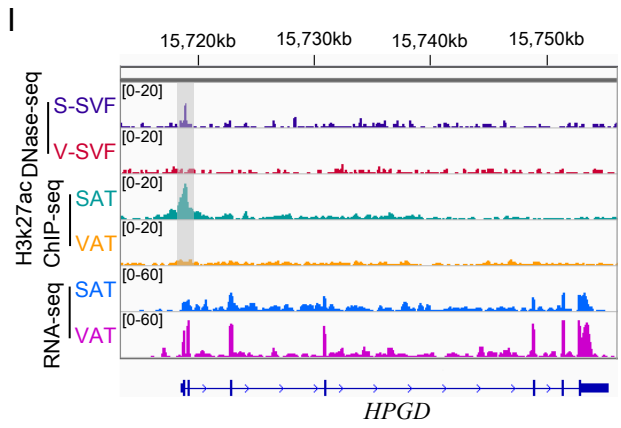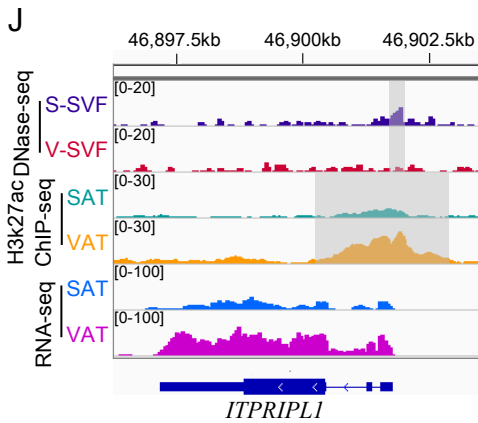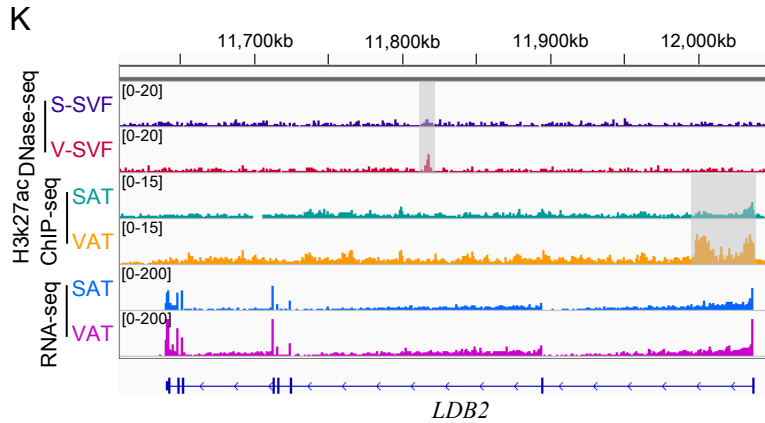

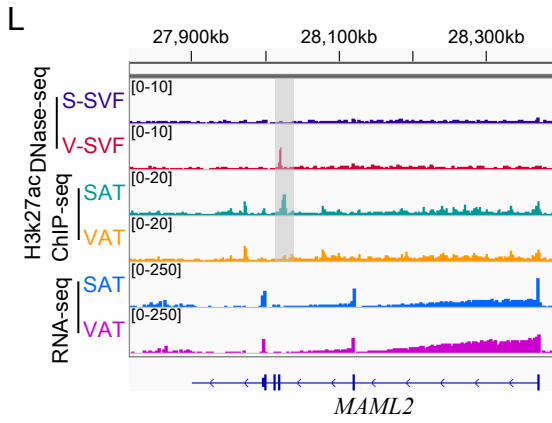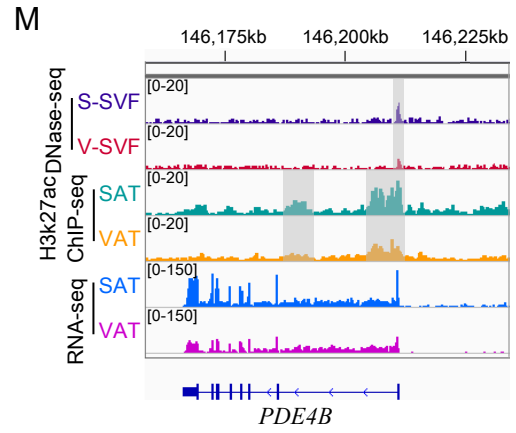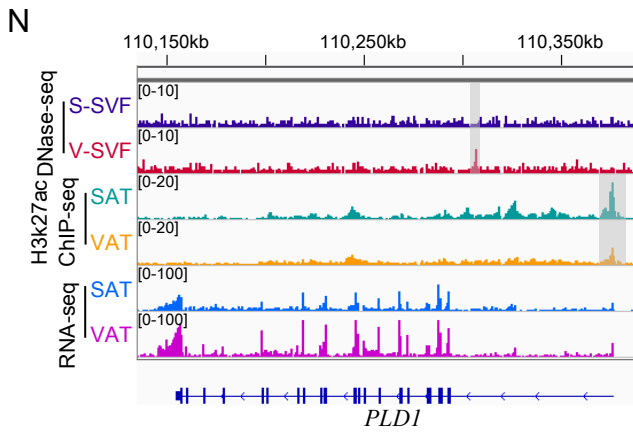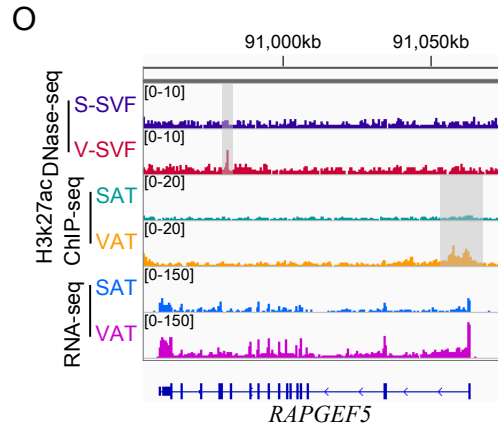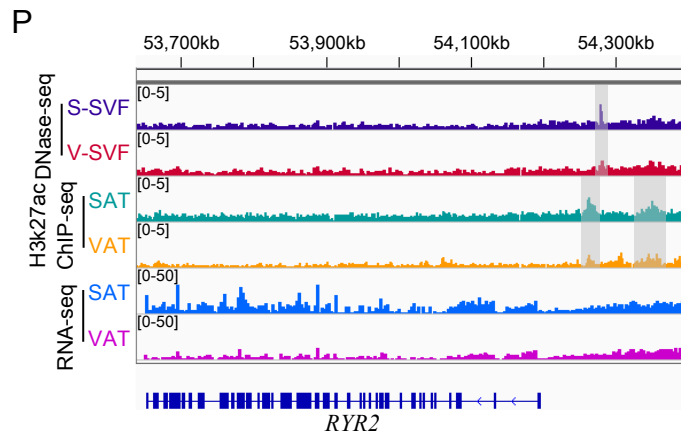

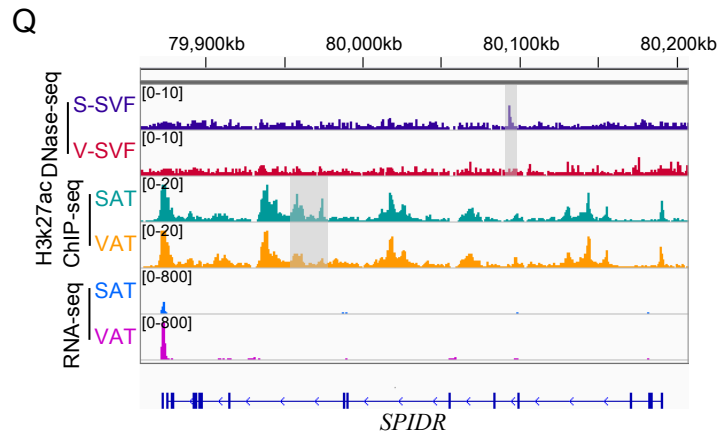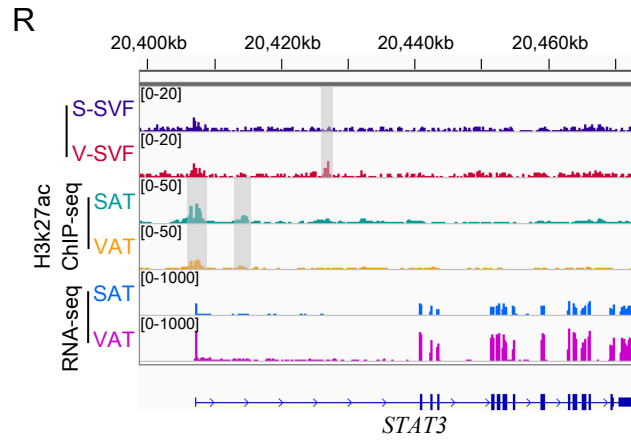

Supplement: Figure_S1.pdf [file Figure_S1.pdf]
