# Supplementary material for: Chromatin accessibility landscape of stromal subpopulations reveals distinct metabolic and inflammatory features of porcine subcutaneous and visceral adipose tissue
Source: PeerJ. 2022 May 24;10:e13250. doi: 10.7717/peerj.13250 (PMC9138157; doi:10.7717/peerj.13250)
Supplement: Supplemental Information 1 [file peerj-10-13250-s001.xlsx]

## Sheet: DHSs of S-SVF
Chromosome	Start site	End site
1	14941	15142
1	2374665	2375023
1	2541118	2541646
1	3119990	3120235
1	3689832	3690084
1	4247387	4247585
1	4893154	4893352
1	5465201	5465620
1	7447180	7447424
1	7589323	7589600
1	7589894	7590181
1	7651502	7651803
1	8718025	8718311
1	10226808	10227006
1	10233051	10233249
1	10411011	10411209
1	12297541	12297741
1	14160589	14160830
1	14795397	14795751
1	14867014	14867418
1	15942827	15943124
1	16139859	16140126
1	16334443	16334641
1	17137928	17138134
1	17341309	17341507
1	17915072	17915270
1	18512939	18513295
1	19097431	19097629
1	19612787	19613069
1	19756119	19756398
1	21231142	21231340
1	21801574	21801824
1	24365344	24365542
1	24633109	24633325
1	25363328	25363610
1	25481578	25481776
1	26080063	26080261
1	26489480	26489991
1	26801121	26801417
1	27346228	27346426
1	28566085	28566510
1	28968695	28968911
1	30923379	30923767
1	31185122	31185385
1	31244176	31244411
1	35926912	35927110
1	37023893	37024262
1	40180215	40180580
1	42729646	42729989
1	43171913	43172166
1	43214959	43215259
1	43392477	43392896
1	43479645	43479856
1	43920377	43920575
1	43930094	43930431
1	44186002	44186443
1	44239310	44239579
1	45170251	45170515
1	46849809	46850007
1	50178957	50179186
1	50721730	50722014
1	50781482	50781788
1	50803858	50804072
1	51428455	51428837
1	52435545	52435775
1	53432523	53432801
1	54400787	54401003
1	54633671	54634007
1	55859868	55860066
1	56070021	56070224
1	57061977	57062212
1	57127991	57128354
1	57129206	57129404
1	57364178	57364443
1	57654453	57654795
1	61598242	61598462
1	63638626	63638844
1	63787656	63787855
1	63956131	63956329
1	64459728	64460035
1	65835606	65835808
1	66017084	66017305
1	66454777	66454976
1	67306152	67306366
1	68748227	68748434
1	70188352	70188558
1	72123211	72123506
1	72311782	72312002
1	72520132	72520528
1	73162352	73162550
1	73190084	73190327
1	73821330	73821528
1	74078749	74078947
1	74180866	74181295
1	74348989	74349187
1	74626982	74627180
1	74657282	74657514
1	75078909	75079107
1	75170302	75170696
1	77159169	77159597
1	82161428	82161705
1	82738283	82738550
1	83137076	83137512
1	85539709	85540022
1	85550079	85550292
1	86164008	86164223
1	86964231	86964461
1	87936257	87936455
1	90650561	90650877
1	92286799	92287068
1	92421727	92421974
1	92603672	92603884
1	92838620	92838818
1	92840467	92840730
1	92852601	92852835
1	96729033	96729261
1	98531833	98532037
1	99940070	99940480
1	100573948	100574160
1	100699382	100699796
1	101447955	101448153
1	103236796	103237016
1	103794090	103794372
1	106013284	106013615
1	106898231	106898460
1	106967940	106968185
1	107038548	107038820
1	107311780	107312119
1	107325076	107325358
1	107583381	107583610
1	107689878	107690120
1	108052839	108053126
1	108206024	108206309
1	108409044	108409337
1	108763087	108763320
1	108923726	108923926
1	109010536	109010776
1	109826078	109826310
1	109931161	109931496
1	110365715	110366142
1	111375259	111375508
1	112344019	112344293
1	112677768	112678061
1	113084932	113085800
1	113258632	113258888
1	113288928	113289242
1	113933000	113933198
1	115056367	115056609
1	118212682	118212948
1	118401213	118401411
1	118756904	118757102
1	119407635	119407833
1	119758902	119759121
1	119948652	119948850
1	120945810	120946099
1	121145879	121146364
1	121376139	121376352
1	122139078	122139350
1	122633554	122633823
1	122726573	122726971
1	123461701	123461995
1	124043207	124043435
1	124585938	124586137
1	126236681	126236928
1	126824856	126825054
1	127237975	127238508
1	127767490	127767850
1	127814118	127814316
1	127858022	127858220
1	127936755	127937041
1	128083973	128084177
1	128483309	128483574
1	128489408	128489951
1	128641390	128641596
1	128808961	128809235
1	129322066	129322285
1	129499441	129499665
1	129942662	129942902
1	130112204	130112566
1	130516505	130516757
1	130746842	130747040
1	130753023	130753222
1	130873645	130873843
1	131241552	131241800
1	139191283	139191568
1	139804786	139804984
1	139925549	139925815
1	140914362	140914560
1	142451490	142451688
1	142997044	142997315
1	143127958	143128156
1	143319551	143319749
1	143540745	143540974
1	143743236	143743464
1	144958951	144959149
1	145707361	145707559
1	146221606	146222008
1	146836299	146836676
1	146863341	146863586
1	146957341	146957539
1	149584172	149584412
1	149737373	149737571
1	150067263	150067461
1	153987927	153988284
1	154919174	154919443
1	157598159	157598403
1	158288513	158288929
1	158861700	158861898
1	158862546	158862923
1	159022134	159022337
1	159317382	159317618
1	159532219	159532440
1	161321214	161321500
1	161769187	161769385
1	161984065	161984305
1	162144658	162144999
1	163169546	163169872
1	163222082	163222304
1	163790129	163790476
1	163857904	163858180
1	164779693	164779913
1	164859746	164859944
1	164930867	164931141
1	165058760	165058958
1	165192909	165193114
1	166126144	166126355
1	167027575	167027781
1	167857654	167857905
1	167915564	167915829
1	169083474	169083672
1	169596404	169596885
1	169801602	169801827
1	169874919	169875117
1	171385688	171386055
1	175145749	175145947
1	176204354	176204552
1	176357867	176358065
1	179456735	179456964
1	179478554	179478817
1	179489752	179490302
1	179686670	179686954
1	179713126	179713377
1	179713672	179713870
1	180015041	180015239
1	180069108	180069392
1	180830074	180830311
1	180933806	180934045
1	181044877	181045176
1	181516118	181516316
1	182202963	182203176
1	182318025	182318450
1	182423272	182423470
1	182605213	182605621
1	183863178	183863383
1	184256640	184256934
1	184378936	184379287
1	185397672	185397870
1	186429977	186430257
1	186530624	186530873
1	187384854	187385381
1	187728015	187728213
1	188335144	188335361
1	188582278	188582661
1	189248704	189249016
1	189923225	189923591
1	190170177	190170500
1	190624941	190625316
1	190677676	190677991
1	191218558	191218756
1	192441461	192441979
1	194439753	194439968
1	194504771	194504998
1	194540873	194541072
1	197309773	197309974
1	198758374	198758600
1	199179481	199179680
1	200760764	200760971
1	201591704	201591963
1	202258729	202259031
1	203683814	203684038
1	204357180	204357378
1	207252364	207252574
1	208174207	208174638
1	214192199	214192397
1	216494650	216494909
1	216692092	216692356
1	217001958	217002437
1	217204887	217205149
1	219075168	219075366
1	219792143	219792341
1	219815351	219815563
1	222524590	222524806
1	222990117	222990315
1	225042253	225042610
1	225713786	225714077
1	228091992	228092306
1	228142111	228142362
1	229281885	229282083
1	229336798	229337085
1	230069227	230069438
1	230544759	230544964
1	230872415	230872648
1	231081556	231081796
1	231142676	231143038
1	231212638	231212871
1	231988745	231988943
1	232930563	232930761
1	233062022	233062224
1	234370634	234370925
1	235790415	235790634
1	235869633	235869930
1	236309748	236309979
1	236339894	236340143
1	236720877	236721118
1	237172131	237172329
1	238177375	238177623
1	238259355	238259627
1	238567840	238568038
1	238804383	238804587
1	239492666	239492921
1	239919053	239919251
1	240859928	240860305
1	241657302	241657635
1	242215247	242215560
1	243153870	243154068
1	243225611	243225950
1	243414811	243415032
1	247101548	247101761
1	247721206	247721457
1	248447838	248448074
1	249905199	249905587
1	250595834	250596032
1	251030175	251030384
1	251634717	251634986
1	252452971	252453231
1	252651558	252652013
1	253092901	253093170
1	253124304	253124506
1	253393768	253394096
1	253656446	253656664
1	254027352	254027678
1	255151814	255152049
1	256131319	256131608
1	257359187	257359427
1	257475826	257476025
1	259076661	259076881
1	260756847	260757188
1	261256690	261256892
1	261407574	261407804
1	262356012	262356551
1	262946284	262946482
1	263821875	263822073
1	265866998	265867386
1	265934844	265935237
1	267480542	267480884
1	267711334	267711536
1	267772291	267772554
1	267924869	267925354
1	268115993	268116195
1	268237422	268237651
1	268266296	268266566
1	268465766	268466015
1	268507336	268507586
1	268530723	268530921
1	268531458	268531768
1	268669577	268669855
1	268894164	268894372
1	268935727	268936022
1	269056147	269056345
1	269259347	269259671
1	269374709	269374978
1	269455400	269455661
1	269879581	269879779
1	270190665	270190909
1	270748420	270748618
1	271377519	271377786
1	271453505	271453835
1	272170649	272171024
1	272359389	272359622
1	272597924	272598122
1	272686238	272686436
2	132304	132556
2	1625637	1625873
2	1642540	1642868
2	2433600	2433807
2	3165381	3165702
2	3194699	3194939
2	3664186	3664575
2	3983407	3983605
2	4194419	4194652
2	4523322	4523664
2	4682017	4682296
2	4788269	4788750
2	5025556	5026006
2	5057026	5057342
2	5256395	5256626
2	5357606	5357855
2	5480567	5481071
2	5745143	5745584
2	5784256	5784457
2	6411664	6412006
2	6758688	6758922
2	6886494	6886692
2	6903268	6903498
2	7075206	7075473
2	7390723	7391257
2	7924814	7925293
2	8354847	8355169
2	8919027	8919254
2	9066382	9066596
2	9119619	9119834
2	9162963	9163246
2	9529141	9529447
2	9535023	9535516
2	9947580	9947800
2	10121567	10121775
2	10614083	10614513
2	11876146	11876489
2	11930636	11930839
2	12380988	12381208
2	12531275	12531473
2	13127012	13127210
2	13176592	13176790
2	13275959	13276294
2	13285112	13285351
2	14895866	14896368
2	14982917	14983169
2	15066677	15066890
2	15368984	15369182
2	15400709	15400907
2	15935597	15935807
2	16164142	16164340
2	16343919	16344117
2	16620233	16620631
2	16772055	16772266
2	18239116	18239347
2	18611688	18612000
2	21212271	21212480
2	23817704	23817958
2	24602570	24603098
2	25423390	25423601
2	25550422	25550652
2	25911055	25911265
2	26094792	26095126
2	26533762	26534016
2	26826955	26827153
2	27213432	27213703
2	27326929	27327325
2	27329950	27330213
2	27419629	27420228
2	27466479	27466907
2	27684822	27685252
2	27769216	27769437
2	28634835	28635033
2	31125199	31125432
2	31999143	31999397
2	32984051	32984365
2	33805915	33806224
2	39032729	39033045
2	39738171	39738369
2	39828987	39829256
2	40310468	40310672
2	40900263	40900502
2	41075461	41075694
2	41349032	41349230
2	42257105	42257342
2	42317097	42317316
2	42364465	42364673
2	44612920	44613201
2	44740005	44740433
2	45290095	45290358
2	45605062	45605321
2	45702268	45702466
2	45782787	45783067
2	46025089	46025526
2	46670312	46670766
2	46904613	46904820
2	47708661	47708887
2	48666239	48666600
2	48729103	48729348
2	49156542	49156749
2	49231811	49232033
2	49243189	49243392
2	49857375	49857580
2	49894573	49894895
2	49945885	49946103
2	50614848	50615046
2	50623987	50624198
2	50672375	50672677
2	50812180	50812402
2	50886570	50886768
2	51153382	51153715
2	51247437	51247799
2	51276176	51276437
2	51671487	51671697
2	52134589	52134787
2	52210538	52211163
2	52272017	52272219
2	52312162	52312482
2	53518130	53518357
2	57324393	57324591
2	58165751	58166310
2	58267363	58267698
2	58506275	58506473
2	58517315	58517815
2	58532772	58532970
2	58801895	58802220
2	59013350	59013677
2	59276974	59277325
2	59409252	59409519
2	59530872	59531163
2	59536770	59536976
2	59602858	59603146
2	59612895	59613093
2	59883496	59883720
2	60175869	60176105
2	60233952	60234150
2	60378731	60378994
2	60567412	60567769
2	60577257	60577455
2	60699517	60699798
2	60961242	60961440
2	60983987	60984335
2	61037664	61037885
2	61062855	61063053
2	61105040	61105390
2	61128132	61128598
2	61272659	61272911
2	61273041	61273361
2	61450305	61450887
2	61470630	61471017
2	62184743	62185191
2	62222059	62222540
2	62251083	62251345
2	64350616	64350847
2	64761419	64761910
2	64781289	64781682
2	64835776	64835974
2	65062707	65063099
2	65074516	65074850
2	65173369	65173663
2	65213516	65213760
2	65372037	65372306
2	65938719	65938917
2	66102100	66102389
2	66262433	66262693
2	66291072	66291289
2	66370675	66371000
2	66475426	66475626
2	66950236	66950753
2	68677843	68678051
2	68715740	68716034
2	69029669	69029885
2	69365070	69365268
2	69413778	69414010
2	69473782	69474017
2	69601531	69601897
2	70671662	70671904
2	70877410	70877676
2	71271454	71271970
2	71365655	71365975
2	71871787	71872009
2	72216165	72216363
2	72656402	72656848
2	72703704	72703914
2	72780645	72781065
2	72909424	72909741
2	72949749	72950105
2	73062933	73063135
2	73130598	73130796
2	73334370	73334616
2	73889730	73890349
2	73984591	73984789
2	74045121	74045439
2	74134597	74134845
2	74150940	74151138
2	74356992	74357454
2	74414207	74414536
2	74455722	74455944
2	74626626	74626874
2	74729670	74729963
2	74746526	74746781
2	75098566	75098802
2	75146735	75146996
2	75289800	75290037
2	75473518	75473760
2	75550690	75550971
2	75727997	75728237
2	75851330	75851577
2	76428266	76428542
2	76475320	76475667
2	76504614	76504821
2	76609694	76610072
2	76657884	76658082
2	76679595	76679815
2	76989173	76989389
2	77211961	77212159
2	77249290	77249591
2	77323918	77324150
2	77330616	77330855
2	77658404	77658716
2	77687302	77687645
2	77743370	77743581
2	78338204	78338402
2	78496792	78496990
2	78876665	78876877
2	78915668	78915936
2	79324059	79324263
2	79511913	79512160
2	79549774	79549972
2	79729269	79729491
2	80194075	80194281
2	80223169	80223367
2	80246930	80247164
2	80367922	80368152
2	80396239	80396437
2	80527343	80527595
2	80919108	80919437
2	80990947	80991145
2	81454094	81454514
2	81613269	81613581
2	81658720	81658982
2	82101438	82101707
2	82304082	82304309
2	82660426	82660624
2	83606987	83607190
2	83745037	83745390
2	84379910	84380161
2	84537815	84538220
2	85890324	85890522
2	85890855	85891053
2	87142668	87142897
2	87498573	87498804
2	88903018	88903274
2	89045522	89045720
2	89255672	89256101
2	89840045	89840243
2	90262979	90263241
2	90263301	90263523
2	90351176	90351384
2	97647331	97647831
2	97703715	97704011
2	98371157	98371415
2	98441410	98441737
2	98703862	98704060
2	101919954	101920221
2	102591233	102591450
2	102735916	102736120
2	103255613	103255821
2	104236532	104236730
2	105203569	105203767
2	106555471	106555679
2	107262533	107262749
2	113325285	113325533
2	113774179	113774438
2	115569469	115569712
2	116256896	116257212
2	116804546	116804744
2	116901246	116901456
2	117235174	117235388
2	117837838	117838366
2	119722663	119723190
2	119804318	119804615
2	120441460	120441723
2	120483138	120483360
2	120982613	120982991
2	123003236	123003513
2	125964678	125964942
2	126013080	126013290
2	126271148	126271405
2	129709526	129709834
2	129807807	129808005
2	130026343	130026719
2	131016278	131016476
2	131856913	131857283
2	132146709	132146907
2	133474744	133474942
2	133576963	133577165
2	133951381	133951590
2	134092762	134093097
2	135283466	135284108
2	135305888	135306125
2	135345552	135345755
2	135539067	135539479
2	135596419	135596617
2	136475901	136476156
2	136522608	136522806
2	136733700	136733948
2	136883790	136884121
2	136957586	136957784
2	137623797	137623999
2	138288329	138288545
2	139782581	139782800
2	140324343	140324615
2	140330861	140331086
2	140504133	140504469
2	140532074	140532354
2	141117871	141118214
2	141336857	141337110
2	141397660	141398048
2	141878903	141879297
2	141884956	141885242
2	141965245	141965504
2	142165922	142166423
2	142313319	142313517
2	142320555	142320899
2	142360988	142361189
2	143124063	143124317
2	143207861	143208093
2	143271026	143271357
2	144300859	144301388
2	144929668	144929887
2	145037511	145037709
2	145628931	145629416
2	146180240	146180468
2	147554146	147554481
2	150662204	150662644
2	151672219	151672419
2	151727302	151727501
3	118152	118415
3	763462	763708
3	1720801	1721024
3	1902917	1903198
3	3622524	3622731
3	3716198	3716440
3	3799996	3800280
3	4643547	4643770
3	5048261	5048669
3	5066618	5066866
3	5630864	5631130
3	5939471	5939669
3	6442269	6442467
3	6504619	6504851
3	6918707	6918921
3	6924578	6924826
3	6924895	6925111
3	7063817	7064033
3	7180632	7180893
3	7571785	7572103
3	7591000	7591288
3	7982697	7982931
3	8155030	8155261
3	8223701	8223913
3	8357193	8357396
3	8467947	8468290
3	8511333	8511613
3	8805819	8806026
3	9127330	9127528
3	9994726	9994965
3	10270738	10270981
3	10416174	10416570
3	10609803	10610084
3	10843219	10843417
3	11219508	11219730
3	11706779	11706977
3	16160536	16160793
3	16393775	16394064
3	16518880	16519319
3	16563798	16564029
3	16983420	16983878
3	17107775	17108195
3	17386226	17386553
3	17635756	17636019
3	17710858	17711066
3	17743816	17744220
3	17801288	17801499
3	17896221	17896520
3	17904881	17905331
3	18178186	18178528
3	18467605	18467814
3	18609771	18610069
3	19368251	19368449
3	19559377	19559713
3	22586706	22586915
3	22695658	22695903
3	24814997	24815292
3	25048216	25048474
3	25656229	25656461
3	26382769	26382970
3	26653641	26653920
3	26760387	26760608
3	28578355	28578680
3	32138677	32138919
3	32821339	32821544
3	33655223	33655618
3	33892339	33892748
3	34055386	34055588
3	34775055	34775253
3	36026548	36026759
3	36863516	36863925
3	37139862	37140091
3	37443052	37443256
3	37555119	37555762
3	38040563	38040761
3	38063102	38063448
3	38718596	38718794
3	38753722	38754034
3	39181319	39181616
3	39274854	39275428
3	39348630	39348833
3	39512557	39512834
3	39776489	39776880
3	40016751	40016949
3	40092193	40092680
3	40184526	40184804
3	40256915	40257234
3	40308089	40308293
3	41208724	41208940
3	41344230	41344529
3	41571677	41571926
3	41850719	41850940
3	42632911	42633214
3	42633355	42633580
3	42863419	42863637
3	43321153	43321479
3	43455731	43456208
3	43552423	43553450
3	43915609	43915807
3	44022546	44022825
3	44148823	44149045
3	44327698	44327921
3	44433463	44433733
3	45201072	45201323
3	45513299	45513497
3	45690718	45690940
3	45888024	45888357
3	46546723	46547008
3	46547232	46547590
3	46901624	46902011
3	46992544	46992971
3	46993266	46993465
3	47470554	47470752
3	47704744	47705015
3	49681326	49681605
3	51555391	51555589
3	52307293	52307491
3	53148922	53149261
3	53291051	53291249
3	53692570	53692860
3	54347289	54347522
3	54775505	54775757
3	54930658	54930966
3	55375126	55375324
3	55676786	55677067
3	55834229	55834427
3	56276951	56277149
3	56632081	56632385
3	56762135	56762457
3	56858121	56858512
3	57386796	57387101
3	57423692	57424021
3	57737955	57738153
3	57928226	57928424
3	58096127	58096429
3	58096598	58097000
3	58206842	58207075
3	58354833	58355152
3	58490892	58491102
3	58575034	58575316
3	59202268	59202546
3	59456310	59456521
3	59539700	59539919
3	59587337	59587535
3	63845132	63845354
3	65263510	65263708
3	67611082	67611348
3	68117141	68117352
3	68231652	68231854
3	68540683	68541007
3	68643278	68643525
3	70696382	70696594
3	71423863	71424095
3	71452315	71452539
3	72289484	72289911
3	72324831	72325145
3	72545151	72545779
3	72619496	72619765
3	72794110	72794332
3	72945877	72946075
3	73028618	73028824
3	73098417	73098615
3	73516075	73516655
3	74004315	74004655
3	76728992	76729390
3	76837153	76837496
3	76901170	76901419
3	77191909	77192791
3	77293444	77293761
3	77740215	77740510
3	77856199	77856437
3	78031735	78031969
3	78440621	78440869
3	80033864	80034129
3	80254587	80255096
3	80331082	80331456
3	81059515	81059725
3	81285711	81286039
3	86179938	86180414
3	86784292	86784490
3	87108532	87108792
3	87231341	87231539
3	92227432	92227898
3	92336981	92337330
3	92500380	92500615
3	92814082	92814356
3	93371545	93371758
3	93854318	93854549
3	94253443	94253680
3	95666815	95667013
3	96317153	96317556
3	96872109	96872339
3	97807146	97807545
3	98155708	98155906
3	100887044	100887260
3	101382732	101383032
3	101957627	101957921
3	102425472	102425757
3	103249479	103249970
3	104894572	104894778
3	105551565	105551773
3	106061326	106061768
3	107508647	107509102
3	107542045	107542243
3	109068088	109068375
3	109196512	109196840
3	110474438	110474637
3	110474692	110474916
3	111328256	111328929
3	111747924	111748220
3	111781575	111781780
3	111919604	111919803
3	111919860	111920094
3	112272473	112272754
3	112550302	112550546
3	112924193	112924519
3	113044776	113045021
3	113229229	113229427
3	113491749	113492032
3	113758872	113759083
3	114250357	114250555
3	114250947	114251396
3	114605577	114605827
3	114713928	114714332
3	114722061	114722436
3	114722615	114722958
3	117775875	117776106
3	118064893	118065145
3	118144536	118144774
3	120417292	120417574
3	121480697	121480944
3	122301064	122301269
3	124196188	124196403
3	125352089	125352291
3	125352951	125353170
3	125751787	125752012
3	126063376	126063627
3	126086840	126087038
3	126220203	126220578
3	126429826	126430145
3	126738637	126738898
3	126795365	126795608
3	127244165	127244363
3	127503171	127503452
3	129573484	129573725
3	129699212	129699410
3	130590146	130590369
3	131237269	131237568
3	132279994	132280244
4	3028608	3028861
4	3061126	3061326
4	3061546	3061808
4	5428324	5428522
4	6920419	6920914
4	7059202	7059400
4	7765173	7765528
4	10160542	10160784
4	14297692	14297890
4	14700147	14700345
4	15182232	15182618
4	15998710	15999257
4	16101194	16101425
4	16287628	16287826
4	19513909	19514107
4	20644729	20644954
4	21215383	21215777
4	27542614	27542847
4	28203312	28203656
4	32609618	32609978
4	32701417	32701666
4	33946521	33946730
4	34084624	34085068
4	34265107	34265348
4	34429797	34430016
4	34431536	34431987
4	34645543	34645799
4	34823448	34823931
4	35767795	35768156
4	35838782	35838980
4	36208752	36209059
4	36653994	36654192
4	37843049	37843247
4	38716650	38716848
4	38914437	38914662
4	39113308	39113506
4	41534887	41535316
4	41804185	41804899
4	41985707	41985952
4	42162328	42162709
4	42777832	42778246
4	42930990	42931290
4	45793140	45793510
4	46447199	46448139
4	46452889	46453517
4	46498380	46498643
4	46499199	46499512
4	46518492	46518690
4	46912325	46912553
4	50508727	50508937
4	51468735	51469126
4	51701260	51701478
4	53952982	53954302
4	55623176	55623398
4	55974778	55974993
4	56173935	56174133
4	56393644	56393842
4	56607883	56608163
4	57282888	57283096
4	57819762	57819960
4	59251991	59252421
4	62139831	62140168
4	62912565	62912787
4	63271098	63271361
4	64710485	64710918
4	64955570	64955770
4	64955884	64956083
4	65020835	65021045
4	67465405	67465659
4	68119714	68119986
4	68120253	68120462
4	68658210	68658426
4	70176538	70176951
4	70380292	70380592
4	71022912	71023135
4	72256818	72257016
4	72881983	72882376
4	75191818	75192016
4	75646035	75646654
4	76026225	76026446
4	77109433	77109631
4	78098828	78099137
4	79447863	79448063
4	79686285	79686531
4	80093375	80093573
4	80190656	80191004
4	80932406	80932673
4	81509843	81510218
4	82521328	82521539
4	82734404	82734602
4	82794142	82794340
4	82794490	82794765
4	83070104	83070302
4	83309544	83309777
4	83776532	83776805
4	84174392	84174805
4	87743090	87743311
4	87993839	87994188
4	88161572	88161773
4	88509262	88509460
4	89040242	89040440
4	89108054	89108517
4	89311183	89311394
4	89326640	89326881
4	89424889	89425087
4	89500356	89500554
4	90214902	90215176
4	90393369	90393615
4	90721781	90721979
4	90722035	90722401
4	92028443	92028854
4	92924399	92924628
4	92964717	92964985
4	93495867	93496104
4	93733744	93734027
4	93926380	93926605
4	93975285	93975532
4	94514787	94514985
4	94557999	94558197
4	94661533	94661731
4	95519703	95519998
4	95549596	95549794
4	95746581	95746804
4	95766688	95767082
4	95894574	95894832
4	95944824	95945062
4	96114950	96115190
4	96287424	96287622
4	96398605	96398924
4	97162819	97163250
4	97958790	97959186
4	98062190	98062461
4	98333337	98333576
4	98562170	98562423
4	98733816	98734183
4	98804708	98804953
4	99225831	99226091
4	99348363	99348599
4	99997460	99998109
4	100377970	100378168
4	100426218	100426416
4	100479103	100479342
4	101521646	101521893
4	103376911	103377205
4	103844665	103844910
4	104315336	104315624
4	105992401	105992762
4	106058142	106058353
4	106568613	106568863
4	106656512	106656877
4	106758870	106759226
4	107120378	107120590
4	107416807	107417137
4	107821715	107822003
4	108011558	108011756
4	108635824	108636085
4	109271723	109271964
4	109722784	109723163
4	109786339	109786567
4	110695228	110695479
4	111293525	111293763
4	111293850	111294205
4	112702662	112702860
4	112703359	112703582
4	117619256	117619475
4	117791914	117792299
4	119255633	119255864
4	119786000	119786198
4	122343359	122343607
4	122621313	122621557
4	122929481	122929679
4	122956924	122957122
4	123370979	123371414
4	124009589	124009997
4	125110012	125110323
4	125643479	125643677
4	127451384	127451652
4	129395471	129395885
4	129721202	129721438
4	130092317	130092515
4	130702529	130702770
5	151475	151815
5	633643	633841
5	758124	758322
5	1038824	1039022
5	2965818	2966016
5	3122202	3122400
5	3224248	3224594
5	3286866	3287166
5	3468693	3469123
5	3833162	3833360
5	4095589	4095787
5	4219410	4219647
5	4649105	4649404
5	5071218	5071450
5	5853189	5853587
5	6174827	6175302
5	6269346	6269551
5	6784505	6784848
5	6799950	6800148
5	6929113	6929357
5	7144475	7144695
5	7514830	7515094
5	7515234	7515593
5	7622460	7622690
5	7776798	7777104
5	8761934	8762259
5	8879880	8880078
5	9322325	9322560
5	9358018	9358216
5	9648597	9648866
5	9695964	9696236
5	9713702	9713911
5	11365342	11365758
5	12242462	12242674
5	12638229	12638623
5	13397217	13397804
5	13579931	13580243
5	13664888	13665108
5	14806750	14807073
5	15153516	15153897
5	15347437	15347775
5	15646121	15646330
5	15673840	15674056
5	15855886	15856084
5	16016257	16016480
5	16176972	16177257
5	16372898	16373204
5	17399978	17400205
5	17490781	17490984
5	18266372	18266622
5	18338661	18338942
5	18409250	18409460
5	18588077	18588507
5	18673781	18673993
5	18878541	18878809
5	18930412	18930646
5	19483923	19484247
5	19484586	19484784
5	19522340	19522622
5	21495572	21495800
5	21517632	21518186
5	21586559	21586886
5	21624876	21625074
5	21626196	21626443
5	21700650	21700924
5	21748940	21749317
5	22389998	22390387
5	22399994	22400255
5	23041971	23042342
5	23233784	23234061
5	26964635	26964852
5	27125958	27126172
5	27251820	27252085
5	27252252	27252512
5	27415658	27415856
5	28300788	28301258
5	28880347	28880827
5	29596634	29596832
5	30485057	30485288
5	30526914	30527150
5	32989544	32989761
5	33105539	33105808
5	33160073	33160271
5	33725283	33725632
5	34777263	34777502
5	35691992	35692366
5	35757154	35757429
5	36273508	36273839
5	36789504	36789841
5	37331738	37331984
5	37782890	37783088
5	37978785	37979078
5	39181184	39181382
5	39744544	39744910
5	39811277	39811507
5	39811861	39812186
5	39812238	39812440
5	39886564	39886822
5	39887218	39887469
5	39888199	39888405
5	39894997	39895227
5	39901912	39902112
5	39904939	39905253
5	39907674	39907894
5	39908528	39908972
5	39909728	39909940
5	39911496	39911695
5	39913135	39913466
5	39929637	39929946
5	39998717	39998940
5	40080988	40081195
5	40083828	40084113
5	40175229	40175431
5	40195762	40196537
5	40197093	40197806
5	40198052	40198263
5	40746934	40747132
5	41859342	41859543
5	42299424	42299699
5	43042959	43043214
5	43941813	43942011
5	44529826	44530094
5	44558393	44558593
5	45751835	45752078
5	46022869	46023116
5	46222519	46222912
5	46370917	46371115
5	46574575	46574807
5	46627075	46627273
5	46740866	46741064
5	46823876	46824101
5	47609201	47609399
5	47698167	47698421
5	48508406	48508777
5	48555445	48555651
5	48890708	48890906
5	49832844	49833042
5	50553432	50553644
5	53691116	53691599
5	57749702	57749950
5	59393508	59393837
5	59831143	59831349
5	61162989	61163262
5	62546014	62546399
5	63005684	63005944
5	63707542	63707879
5	63829739	63830022
5	63858608	63858880
5	63859552	63859758
5	63951033	63951370
5	64059129	64059414
5	64106043	64106241
5	64278525	64278723
5	64378622	64378821
5	64803187	64803394
5	65788720	65788952
5	65856492	65856783
5	66067182	66067497
5	66321148	66321375
5	67106463	67106990
5	67305038	67305541
5	67363774	67363972
5	68000080	68000409
5	68167746	68168039
5	68755711	68755909
5	69878899	69879104
5	72041259	72041514
5	73497097	73497378
5	74672736	74672943
5	74880981	74881337
5	76635491	76635689
5	76876549	76877030
5	77127590	77127917
5	78328319	78328517
5	78415211	78415409
5	79305498	79305764
5	79355925	79356322
5	80492125	80492422
5	80530992	80531208
5	81206019	81206219
5	82257766	82258026
5	83935528	83935732
5	85036650	85036848
5	86405415	86405673
5	87279956	87280216
5	88104638	88104843
5	88104909	88105107
5	88292802	88293058
5	88508276	88508474
5	89673402	89673740
5	90131518	90131792
5	90228126	90228695
5	90234865	90235091
5	90244799	90245045
5	90245731	90245929
5	90246451	90246735
5	90562133	90562363
5	90814937	90815215
5	92125489	92125755
5	99358394	99358731
5	100428861	100429099
6	30841	31093
6	33993	34241
6	38841	39039
6	413308	413506
6	455420	455861
6	1545873	1546094
6	1703236	1703472
6	2595994	2596215
6	2638125	2638407
6	3691047	3691325
6	4269617	4269835
6	4479785	4479997
6	4513482	4513828
6	4698557	4698891
6	4755119	4755317
6	6254423	6254672
6	7189072	7189273
6	8528824	8529029
6	10328403	10328744
6	12195044	12195258
6	13011667	13011870
6	13187523	13187721
6	13321352	13321550
6	13456455	13456678
6	14480745	14480995
6	14715544	14715766
6	14882241	14882446
6	14942712	14942944
6	14998011	14998322
6	15911283	15911537
6	17434371	17434636
6	17605640	17605892
6	17854643	17854841
6	18335385	18335583
6	18499120	18499318
6	18500123	18500326
6	18503618	18503827
6	18506231	18506439
6	18512070	18512284
6	18644921	18645152
6	18901164	18901419
6	19154282	19154491
6	19206957	19207237
6	19373357	19373555
6	19969274	19969580
6	20016908	20017139
6	20372358	20372601
6	23842387	23842585
6	25582790	25582995
6	26299979	26300201
6	26377346	26377546
6	27293462	27293660
6	27540020	27540242
6	27684246	27684506
6	28195215	28195486
6	28428368	28428566
6	28464694	28464930
6	28820463	28820719
6	29078873	29079086
6	29115402	29115626
6	29118262	29118611
6	29366536	29366808
6	29467593	29467795
6	31030855	31031073
6	31564650	31564934
6	32014065	32014294
6	32044121	32044359
6	32071900	32072122
6	34121228	34121606
6	34669287	34669485
6	34758609	34758815
6	34788130	34788444
6	37193608	37193970
6	37592155	37592356
6	37943608	37943830
6	37943908	37944267
6	38744580	38744964
6	38758819	38759130
6	38781190	38781426
6	38837348	38837587
6	39373504	39373702
6	41062284	41062774
6	42559755	42560140
6	42574654	42574852
6	42717789	42717987
6	42945355	42945635
6	42969605	42969803
6	43164654	43165119
6	43815475	43815702
6	43927738	43927936
6	43933586	43934003
6	44670297	44670516
6	44753265	44753465
6	45335178	45335376
6	45497153	45497351
6	45511143	45511408
6	46229120	46229358
6	46403658	46403880
6	47289850	47290227
6	47475870	47476152
6	47493709	47494066
6	47638831	47639180
6	47655583	47655923
6	47703404	47703725
6	47740882	47741214
6	48002287	48002645
6	48304944	48305182
6	48313730	48314135
6	48406154	48406352
6	48728320	48728687
6	48728885	48729083
6	48918121	48918340
6	48943240	48943454
6	48971031	48971330
6	48988924	48989247
6	49148667	49148901
6	49179214	49179448
6	49358093	49358348
6	49562754	49562959
6	49571084	49571322
6	49665413	49665754
6	49711827	49712088
6	49840362	49840661
6	50441877	50442127
6	50569666	50569866
6	51029721	51029966
6	51113743	51113960
6	51359624	51359901
6	51378113	51378311
6	51589544	51589797
6	51963945	51964197
6	52099943	52100175
6	52294253	52294545
6	52554018	52554436
6	52703124	52703322
6	52711232	52711457
6	52877012	52877293
6	52937555	52937871
6	53045064	53045276
6	53065203	53065802
6	53131094	53131479
6	53275143	53275640
6	53784351	53784609
6	54250070	54250471
6	54288092	54288419
6	54476802	54477000
6	54529652	54529850
6	54564388	54564717
6	54590424	54590723
6	54685088	54685322
6	54685996	54686279
6	54786072	54786593
6	54882058	54882515
6	55412489	55412687
6	55804843	55805112
6	55939664	55939867
6	55970358	55970625
6	55991352	55991672
6	56189514	56189712
6	56510190	56510390
6	56610729	56611049
6	56745994	56746222
6	57258420	57258618
6	57701609	57701807
6	57965066	57965298
6	58396600	58396798
6	58458032	58458274
6	58549875	58550243
6	58552432	58552894
6	58553411	58553727
6	58805641	58805839
6	58857832	58858130
6	59254814	59255084
6	59516575	59517106
6	59773040	59773240
6	60639481	60639688
6	60706888	60707302
6	60759064	60759679
6	60880986	60881194
6	61396068	61396266
6	62968328	62968526
6	63244747	63244973
6	63444647	63444897
6	63705846	63706183
6	65150639	65150993
6	65680656	65680952
6	67434412	67434640
6	67445640	67445918
6	67605408	67605966
6	68487234	68487691
6	68698907	68699146
6	68699206	68699533
6	69258478	69258676
6	69837755	69837983
6	69934638	69934958
6	70241368	70241918
6	70313362	70313561
6	71253516	71253761
6	71896312	71896510
6	72256775	72256975
6	72579392	72579590
6	73146213	73146512
6	74651738	74652121
6	74799097	74799306
6	74809310	74809550
6	75015348	75015699
6	75303167	75303430
6	75325623	75325836
6	75445954	75446234
6	75651228	75651426
6	76024081	76024279
6	77397216	77397490
6	77456145	77456343
6	77707947	77708168
6	78011397	78011595
6	78241629	78241979
6	78692482	78692700
6	79007122	79007355
6	79007677	79007880
6	79738860	79739113
6	79809839	79810079
6	80034986	80035207
6	81073668	81073932
6	81239378	81239724
6	81418879	81419256
6	81630237	81630457
6	81722328	81722591
6	81773211	81773445
6	82309044	82309476
6	82400812	82401334
6	82854207	82854526
6	82872872	82873070
6	83089587	83090150
6	83543485	83543913
6	83650804	83651085
6	83823074	83823272
6	83983128	83983488
6	84069290	84069711
6	84238507	84238823
6	84417881	84418146
6	84467431	84467708
6	84866850	84867048
6	84879728	84880181
6	84918645	84918859
6	85084844	85085182
6	85321766	85321974
6	85327080	85327278
6	85533334	85533544
6	85642835	85643143
6	86092227	86092449
6	86092772	86093001
6	86131581	86131793
6	86137609	86137827
6	87879302	87879847
6	88452586	88452945
6	88530003	88530444
6	88749447	88749856
6	88838707	88838995
6	88921447	88921654
6	88986963	88987326
6	89118793	89118995
6	89317916	89318195
6	89345726	89345924
6	91074957	91075167
6	91408194	91408442
6	91747846	91748056
6	92081342	92081828
6	92327732	92328102
6	92349865	92350163
6	92413933	92414131
6	94802840	94803286
6	94891151	94891489
6	95251826	95252068
6	95812007	95812205
6	96362811	96363068
6	96733613	96733896
6	97324342	97324713
6	97359569	97359779
6	97481781	97481979
6	98114766	98114964
6	98254214	98254666
6	98598254	98598817
6	98950874	98951243
6	99435515	99435713
6	100092857	100093273
6	100363500	100363831
6	100789343	100789547
6	101756668	101756956
6	103965094	103965317
6	105480526	105480724
6	106314947	106315272
6	106788222	106788446
6	108450459	108450697
6	108763469	108763693
6	109109984	109110281
6	110122214	110122412
6	110987557	110987791
6	113910251	113910497
6	114247561	114247809
6	115786145	115786359
6	115786666	115786963
6	117691298	117691591
6	118878759	118879000
6	119833718	119834061
6	120669917	120670331
6	123780164	123780362
6	125696209	125696407
6	126703008	126703289
6	126703394	126703721
6	127714475	127714704
6	127960546	127960761
6	128030159	128030464
6	128335553	128335792
6	129055359	129055623
6	129635500	129635836
6	130107787	130107985
6	134183025	134183256
6	136816982	136817182
6	137575520	137575837
6	137596565	137596784
6	139584024	139584222
6	141440843	141441042
6	141960069	141960268
6	142516767	142517029
6	144144829	144145205
6	144943788	144944276
6	145186595	145186801
6	145674447	145674873
6	145679919	145680223
6	146266378	146266626
6	146987225	146987663
6	147394999	147395208
6	147428955	147429194
6	147954214	147954500
6	148761523	148761742
6	149748207	149748432
6	149985529	149985729
6	150014069	150014280
6	153212957	153213277
6	153685488	153685836
6	153756025	153756264
6	153882237	153882456
6	157495564	157495780
6	158338221	158338694
6	159854776	159854979
6	160298781	160299006
6	160451103	160451400
6	160911589	160911787
6	161173626	161174012
6	163212063	163212473
6	164197244	164197586
6	164207866	164208104
6	164524059	164524274
6	164526754	164527130
6	164684546	164684995
6	164777847	164778132
6	164887567	164887807
6	165184859	165185117
6	165267889	165268198
6	165620774	165621005
6	165710483	165710780
6	165824609	165824861
6	165824933	165825183
6	165847687	165847930
6	166645028	166645284
6	167642359	167642627
6	168736205	168736808
6	168870249	168870492
6	169221313	169221551
6	170763608	170763878
7	527946	528224
7	978728	979022
7	1656759	1656996
7	2176535	2176734
7	2379101	2379410
7	2446240	2446457
7	2963219	2963446
7	3004794	3004992
7	4750538	4751101
7	5286030	5286487
7	8093479	8094033
7	8518471	8518822
7	10452835	10453168
7	10867777	10868403
7	12117069	12117554
7	13466301	13466686
7	13845941	13846139
7	13935333	13935591
7	15254581	15254798
7	15643741	15643939
7	15793699	15793973
7	19502258	19502528
7	19585856	19586093
7	20998841	20999039
7	21024477	21024799
7	21143253	21143581
7	21835384	21835600
7	22824177	22824381
7	23165729	23165986
7	23191830	23192028
7	23245592	23245902
7	23852712	23852971
7	24046916	24047114
7	24232001	24232215
7	24583124	24583376
7	24592063	24592298
7	24604444	24604642
7	24604995	24605196
7	24605288	24605538
7	24605655	24605890
7	24606102	24606302
7	25072204	25072425
7	25247675	25247916
7	25809115	25809383
7	27206586	27206847
7	27209500	27209851
7	28765412	28765610
7	28812161	28812436
7	29379478	29379676
7	29681157	29681360
7	29694317	29694867
7	30307922	30308244
7	30667008	30667223
7	31160924	31161188
7	31222348	31222763
7	31313030	31313262
7	31550495	31550827
7	31791362	31791573
7	32146014	32146358
7	32787968	32788593
7	32876341	32876539
7	33000370	33000620
7	33085622	33085820
7	33236774	33236972
7	34183290	34183625
7	35735188	35735456
7	36296713	36296970
7	36386151	36387149
7	36410382	36410799
7	36920484	36920818
7	38213165	38213381
7	38216268	38216598
7	38388846	38389044
7	38569442	38569798
7	38657789	38658026
7	40205971	40206271
7	40896361	40896616
7	41469186	41469459
7	42033233	42033439
7	45815330	45815576
7	46185213	46185541
7	46244902	46245100
7	46945980	46946178
7	47089280	47089518
7	47089602	47089849
7	47091903	47092137
7	47640911	47641131
7	47978352	47978576
7	48010753	48010983
7	48049981	48050259
7	48273485	48273703
7	48431505	48431893
7	48967201	48967485
7	49817531	49817768
7	49942707	49943193
7	50118809	50119011
7	50163663	50163861
7	51186128	51186348
7	51698997	51699195
7	51929430	51929677
7	52557472	52557707
7	52793496	52793730
7	52883117	52883317
7	53020340	53020898
7	53317440	53317693
7	54655493	54655723
7	55811687	55811936
7	56083522	56083720
7	56540232	56540462
7	57040660	57040998
7	57150510	57150805
7	57187282	57187487
7	57503548	57503902
7	58176651	58177024
7	58959904	58960210
7	58993889	58994089
7	58998637	58998934
7	59226186	59226393
7	59440445	59440643
7	59452126	59452373
7	59768456	59768768
7	60693051	60693273
7	60878329	60878603
7	60971516	60971917
7	61108448	61108646
7	61113543	61113845
7	63123887	63124138
7	63840738	63840936
7	64123803	64124007
7	64507767	64508120
7	64576940	64577219
7	64808506	64808731
7	64916722	64916925
7	65302695	65303074
7	65600147	65600345
7	65685621	65685855
7	68143319	68143596
7	68318134	68318477
7	68470486	68470958
7	75089534	75089749
7	75180933	75181183
7	75756165	75756958
7	75777647	75777902
7	75789049	75789342
7	75951068	75951326
7	76036271	76036592
7	76431797	76432032
7	76547242	76547465
7	77698921	77699179
7	77719360	77719583
7	78447066	78447503
7	78729372	78729570
7	81103737	81103950
7	81669595	81669896
7	81889887	81890095
7	83085613	83085919
7	86103483	86103915
7	86123960	86124158
7	86124386	86124781
7	86227768	86228047
7	86354013	86354275
7	87889195	87889473
7	88575724	88575977
7	89167921	89168384
7	89930128	89930347
7	90346454	90346845
7	90955373	90955659
7	91084678	91085028
7	91413889	91414094
7	93393903	93394215
7	93552536	93552734
7	96380290	96380488
7	96798074	96798392
7	96999459	96999718
7	97197889	97198135
7	97381833	97382229
7	97740337	97740535
7	98135554	98135752
7	98588822	98589020
7	98822115	98822457
7	99959186	99959481
7	100123375	100123610
7	100180697	100181001
7	100392036	100392310
7	100510617	100510815
7	101286734	101286932
7	103760189	103760411
7	103768183	103768598
7	104009182	104009637
7	104189214	104189412
7	104189640	104189947
7	104282989	104283517
7	109961307	109961562
7	110463376	110463732
7	111536331	111536702
7	112146980	112147296
7	112160699	112160944
7	112753176	112753699
7	113148326	113148693
7	113148985	113149213
7	114236899	114237153
7	114573739	114574352
7	114590750	114591188
7	115271523	115271721
7	116541526	116541786
7	116786908	116787470
7	117241872	117242117
7	117363391	117363590
7	117586543	117586786
7	117676333	117676531
7	117862478	117862676
7	118848112	118848310
7	120486571	120487083
7	120755008	120755224
7	121068971	121069169
7	121238135	121238371
7	121376176	121376374
7	121720805	121721015
8	945	1735
8	2194	2440
8	5591	5944
8	12222	12480
8	15877	16114
8	140062	140464
8	1038969	1039288
8	1198715	1198913
8	1216808	1217165
8	1240774	1240972
8	1387461	1387933
8	1626452	1626666
8	1626801	1627229
8	3390010	3390259
8	3797341	3797567
8	3828256	3828644
8	3946207	3946405
8	4031187	4031420
8	4095665	4095870
8	4122863	4123166
8	4392526	4392739
8	5890618	5890820
8	6452119	6452607
8	7393727	7393930
8	7600881	7601079
8	8926462	8926660
8	10990919	10991170
8	12082568	12082766
8	12487648	12487850
8	12590183	12590458
8	12969254	12969500
8	17580108	17580307
8	17691561	17691791
8	19507632	19507836
8	19708062	19708260
8	20254850	20255072
8	20453135	20453395
8	20456273	20456483
8	20492154	20492356
8	25180744	25180942
8	26257559	26257759
8	27967704	27967916
8	28920573	28920776
8	29190508	29190745
8	29489584	29489782
8	29921068	29921266
8	30114514	30114716
8	30191955	30192153
8	30759446	30759644
8	30840182	30840614
8	31134106	31134506
8	32354267	32354485
8	32575984	32576182
8	33729299	33729612
8	35219383	35219588
8	38241279	38241612
8	38745178	38745520
8	38982409	38982678
8	39360145	39360345
8	39408635	39408859
8	40145217	40145571
[truncated: 1,931 more rows]

## Sheet: DHSs of V-SVF
Chromosome	Start site	End site
1	2352564	2352763
1	2374758	2375030
1	2541069	2541614
1	2792460	2792658
1	2894430	2894628
1	2971604	2971829
1	3689809	3690081
1	4350691	4350924
1	7223973	7224171
1	8007812	8008012
1	8172822	8173045
1	8935127	8935381
1	9257548	9257746
1	9936940	9937163
1	10898664	10898862
1	15107162	15107360
1	15942804	15943046
1	16139649	16139862
1	16171930	16172250
1	16501529	16501779
1	17734256	17734460
1	17850473	17850671
1	18151876	18152128
1	18513081	18513349
1	20211238	20211542
1	20979374	20979572
1	21231108	21231468
1	24215688	24215917
1	26340730	26340962
1	27466275	27466542
1	33277193	33277500
1	33444604	33444827
1	34693255	34693537
1	35696620	35696818
1	36301677	36301915
1	36934989	36935191
1	37169129	37169327
1	40180280	40180532
1	40341147	40341345
1	40341399	40341635
1	42141907	42142165
1	42192580	42192778
1	42911163	42911361
1	43315147	43315345
1	43392522	43392838
1	43479628	43479872
1	43625827	43626025
1	44239152	44239452
1	51232283	51232481
1	52869985	52870384
1	53180198	53180396
1	54376709	54376924
1	54633633	54633831
1	58743709	58743999
1	60328941	60329179
1	63361666	63361929
1	63787642	63787850
1	63956151	63956362
1	64295398	64295687
1	64665686	64665917
1	66847499	66847698
1	69007343	69007673
1	69790175	69790373
1	70188393	70188591
1	71481806	71482004
1	71613628	71613879
1	72305350	72305577
1	72947279	72947518
1	74627985	74628183
1	75243430	75243725
1	75244068	75244326
1	75538325	75538550
1	76458394	76458717
1	77159176	77159473
1	77400996	77401325
1	79755614	79755823
1	80121357	80121555
1	81227842	81228040
1	82161522	82161832
1	82738349	82738570
1	83089428	83089628
1	84077026	84077231
1	85254826	85255031
1	85341276	85341578
1	85539642	85540015
1	85550041	85550320
1	86708329	86708527
1	86954438	86954636
1	87336277	87336596
1	88574557	88574939
1	90650526	90650812
1	91841936	91842145
1	92292120	92292361
1	92421743	92421983
1	92603672	92603986
1	92838594	92838819
1	92840482	92840726
1	92935205	92935403
1	93832641	93832839
1	95950654	95950881
1	96729014	96729342
1	97040828	97041142
1	98592539	98592755
1	99821847	99822088
1	99862199	99862446
1	99909209	99909417
1	99940033	99940321
1	100496735	100496995
1	103023450	103023648
1	103794222	103794452
1	104062876	104063131
1	104671820	104672043
1	105958849	105959068
1	107038611	107038809
1	110365672	110366119
1	111241700	111241940
1	113084914	113085218
1	113440095	113440293
1	114195492	114195690
1	117625071	117625269
1	118402091	118402300
1	118736381	118736581
1	120291209	120291430
1	123365217	123365415
1	126716537	126716780
1	127125770	127125995
1	128483460	128483670
1	128808918	128809237
1	129740819	129741017
1	131447923	131448125
1	132827935	132828133
1	134207944	134208142
1	136039513	136039731
1	137163727	137163932
1	138341002	138341265
1	139739521	139739719
1	139925537	139925842
1	140333039	140333244
1	140914356	140914554
1	141886938	141887194
1	142194323	142194530
1	142936543	142936789
1	144218429	144218640
1	144577843	144578041
1	145399492	145399731
1	146133575	146133788
1	146335895	146336164
1	146375286	146375488
1	146412429	146412757
1	146829448	146829655
1	146836212	146836693
1	146863287	146863632
1	146912679	146912877
1	148033867	148034065
1	149960627	149960825
1	151184056	151184254
1	156435138	156435336
1	156928265	156928522
1	158641718	158641916
1	158862636	158862895
1	159022419	159022617
1	161587752	161588297
1	162260025	162260223
1	162601784	162602083
1	163790133	163790482
1	164143683	164143881
1	164155408	164155652
1	164753072	164753271
1	164930832	164931092
1	165058677	165058881
1	165090125	165090336
1	165192529	165192730
1	165437001	165437222
1	166270885	166271125
1	169083471	169083670
1	169623894	169624182
1	169671477	169671832
1	169915881	169916169
1	170761366	170761633
1	171244230	171244475
1	174740246	174740484
1	174773999	174774203
1	177983690	177983888
1	177984135	177984445
1	179611119	179611317
1	180933820	180934018
1	181044849	181045229
1	181681147	181681426
1	181995701	181995902
1	182202980	182203231
1	182423350	182423750
1	183792614	183792842
1	184403198	184403421
1	188167812	188168010
1	188349371	188349578
1	188981771	188982057
1	189248839	189249142
1	189622271	189622469
1	190205776	190206061
1	190527038	190527266
1	190624904	190625355
1	191350100	191350430
1	192441408	192441984
1	193078560	193078891
1	194351433	194351662
1	194351873	194352071
1	194439770	194439979
1	196518363	196518610
1	197227073	197227412
1	199631724	199631949
1	202258667	202258973
1	205402683	205402881
1	207252105	207252577
1	207444559	207444805
1	210307934	210308192
1	211177340	211177538
1	212621881	212622090
1	215970118	215970405
1	216116147	216116483
1	216366830	216367103
1	217001985	217002311
1	217204958	217205176
1	219210378	219210617
1	219815320	219815528
1	220238349	220238547
1	221269045	221269359
1	222119780	222119990
1	223753262	223753460
1	226100145	226100364
1	226100626	226100824
1	227406587	227407006
1	228092108	228092314
1	228141834	228142087
1	229281858	229282147
1	230227598	230227821
1	231988651	231988933
1	232355468	232355901
1	234370594	234370839
1	235772758	235773015
1	236632571	236632958
1	238254118	238254316
1	239173484	239173718
1	239492646	239492908
1	239975192	239975454
1	240023992	240024207
1	240748210	240748411
1	243464921	243465201
1	243532979	243533337
1	245037358	245037568
1	247706716	247706946
1	247766332	247766531
1	248379733	248379964
1	248447753	248448055
1	248904240	248904527
1	250239724	250239922
1	250595823	250596065
1	251164471	251164669
1	252651457	252651911
1	253092893	253093179
1	253623863	253624061
1	253656317	253656629
1	253988142	253988340
1	254249758	254250009
1	256131297	256131848
1	257191257	257191455
1	257359157	257359442
1	259076648	259076846
1	259270802	259271000
1	260347652	260347870
1	261256691	261256889
1	261354486	261354684
1	262061453	262061651
1	262356104	262356347
1	262965624	262965822
1	263444022	263444297
1	263548076	263548300
1	263696937	263697167
1	264027987	264028185
1	264278759	264278990
1	265867055	265867253
1	265934834	265935102
1	267570756	267570990
1	267924842	267925380
1	268266320	268266530
1	268364737	268365012
1	268935870	268936103
1	269676115	269676375
1	270761386	270761584
1	271181880	271182089
1	271320236	271320434
1	271638637	271638852
1	271986118	271986375
1	272711092	272711348
1	274070904	274071297
2	1130685	1130883
2	2318196	2318452
2	2427089	2427319
2	3664045	3664530
2	4523422	4523640
2	5025801	5026030
2	5212573	5212801
2	5357499	5357945
2	6044015	6044214
2	6367624	6367948
2	7454930	7455213
2	7924780	7925017
2	8361757	8362047
2	8994102	8994328
2	9098254	9098502
2	9163069	9163298
2	11689400	11689598
2	11876042	11876362
2	12381851	12382064
2	12398165	12398365
2	13275923	13276209
2	14759994	14760199
2	16207885	16208083
2	16620241	16620565
2	17969787	17970009
2	18055641	18055841
2	20274530	20274728
2	21079991	21080189
2	23060925	23061151
2	23708217	23708458
2	24408398	24408600
2	25204958	25205156
2	26094861	26095059
2	26533748	26533957
2	26826853	26827160
2	27326920	27327467
2	27329906	27330220
2	27419558	27420202
2	27421140	27421587
2	27466438	27466717
2	27880664	27880862
2	28206566	28206866
2	28995874	28996093
2	31118686	31118885
2	32434081	32434309
2	34707852	34708058
2	36884635	36884920
2	37713267	37713516
2	43229891	43230089
2	43824432	43824630
2	44012579	44012783
2	44375313	44375546
2	45165638	45165836
2	45782773	45783043
2	45805840	45806108
2	46025238	46025482
2	46890977	46891272
2	46904512	46904743
2	48666158	48666399
2	49894426	49894745
2	50614823	50615049
2	50623995	50624195
2	50672372	50672675
2	51036500	51036793
2	51603482	51603787
2	52311879	52312080
2	56219830	56220118
2	57390548	57390755
2	57523003	57523201
2	58165991	58166293
2	58267284	58267579
2	58517630	58517839
2	59134289	59134526
2	59276931	59277129
2	59409179	59409550
2	59530810	59531026
2	59946291	59946504
2	60286702	60286900
2	61128072	61128602
2	61349156	61349430
2	61450616	61450888
2	62110587	62110785
2	62316009	62316207
2	64350286	64350484
2	64761355	64761617
2	65676549	65676747
2	66475495	66475801
2	66950379	66950671
2	67907693	67907891
2	69339722	69339925
2	69413760	69413959
2	70671586	70671875
2	71060284	71060637
2	72909413	72909719
2	73206867	73207255
2	73701781	73701979
2	73889890	73890365
2	74535464	74535773
2	74626605	74626803
2	74905241	74905504
2	76337804	76338162
2	77323948	77324163
2	77340152	77340350
2	77563218	77563483
2	78876765	78876963
2	79163078	79163276
2	81308647	81308882
2	83078439	83078718
2	84537862	84538060
2	86529701	86530033
2	87133335	87133566
2	87778052	87778484
2	88078148	88078424
2	89045259	89045478
2	89057560	89057782
2	89944581	89944819
2	90233348	90233571
2	93659824	93660098
2	95018426	95018689
2	96414742	96414940
2	96426496	96426694
2	96681875	96682124
2	97647694	97647892
2	100606005	100606227
2	102424391	102424650
2	103568940	103569145
2	104332247	104332445
2	105046610	105046849
2	105203001	105203418
2	107262506	107262740
2	111369346	111369580
2	111370219	111370444
2	111560579	111560814
2	112436597	112436795
2	113773948	113774486
2	115569474	115569715
2	117313861	117314059
2	117742873	117743083
2	117838183	117838399
2	118831567	118831765
2	119275838	119276036
2	119500518	119500716
2	119722844	119723237
2	119821866	119822064
2	120982736	120982989
2	123158167	123158365
2	125964623	125965002
2	126013031	126013242
2	126271248	126271552
2	130336449	130336763
2	130360480	130360699
2	130443925	130444196
2	134093371	134093619
2	135283710	135283987
2	136170726	136170987
2	137038025	137038267
2	137241734	137241951
2	139723613	139723859
2	140504184	140504549
2	140532046	140532316
2	141879014	141879329
2	142166044	142166334
2	142717236	142717434
2	143688816	143689014
2	144756014	144756214
2	145629138	145629361
2	147188707	147188905
2	147788982	147789247
2	148680418	148680637
2	149053824	149054062
2	149477979	149478177
2	149562241	149562484
2	150662239	150662664
3	108710	108964
3	118175	118560
3	629163	629361
3	1952915	1953245
3	2791334	2791540
3	3570261	3570481
3	4587815	4588207
3	4643978	4644176
3	5117889	5118134
3	5138373	5138602
3	5630857	5631150
3	6921161	6921359
3	6923411	6923611
3	6924572	6924831
3	6924895	6925125
3	6928160	6928378
3	7063728	7064042
3	7174441	7174716
3	7274698	7274896
3	7669372	7669593
3	8223630	8223862
3	8468002	8468279
3	8511433	8511631
3	8531312	8531510
3	8798431	8798698
3	8843890	8844088
3	8854641	8854847
3	9994541	9994866
3	11970483	11970683
3	12299410	12299682
3	14217705	14217940
3	14524983	14525336
3	14964126	14964367
3	15005842	15006040
3	15943258	15943739
3	16012640	16012871
3	16205441	16205760
3	16392780	16392985
3	17107960	17108158
3	17635833	17636212
3	18609712	18609987
3	19559435	19559724
3	19609639	19609885
3	19993245	19993443
3	20107102	20107328
3	20315419	20315653
3	21330310	21330564
3	22182446	22182733
3	22740308	22740642
3	24260588	24260786
3	24288947	24289149
3	25048220	25048549
3	25656245	25656461
3	25847589	25848188
3	25977787	25977993
3	26653672	26654023
3	26794691	26794994
3	28576578	28576776
3	28583923	28584121
3	31094806	31095004
3	31132914	31133174
3	31375782	31375989
3	31759970	31760168
3	32821333	32821554
3	33041974	33042181
3	33417962	33418204
3	34401006	34401225
3	34662148	34662367
3	34775051	34775249
3	35834975	35835194
3	36548844	36549047
3	36863331	36863944
3	37555230	37555428
3	37928450	37928648
3	38063105	38063336
3	38462343	38462618
3	39171604	39171823
3	40092257	40092681
3	41344035	41344379
3	41630311	41630531
3	41850713	41851071
3	41851329	41851683
3	42022519	42022857
3	42128997	42129278
3	42296742	42296968
3	42633204	42633402
3	42667223	42667497
3	42741734	42741969
3	42757173	42757466
3	42911335	42911675
3	42936349	42936638
3	43455859	43456057
3	43552437	43552677
3	43552734	43553504
3	45888200	45888436
3	45916879	45917116
3	46066748	46066974
3	46196870	46197068
3	46546719	46547039
3	46547319	46547602
3	47338151	47338349
3	47601268	47601566
3	47759093	47759329
3	48012913	48013282
3	48685150	48685369
3	50152101	50152327
3	51522892	51523090
3	53956072	53956329
3	54163825	54164052
3	55584302	55584544
3	56277249	56277451
3	56610356	56610600
3	56811339	56811554
3	57037326	57037524
3	57062341	57062539
3	57423800	57424111
3	58096775	58097003
3	58354858	58355065
3	59167708	59167935
3	59202305	59202536
3	60967237	60967460
3	63697716	63697914
3	63845130	63845349
3	64032214	64032425
3	65204114	65204372
3	67531433	67531732
3	67878019	67878248
3	68584616	68584872
3	69067429	69067627
3	69206033	69206236
3	69602948	69603351
3	70670541	70670847
3	71180565	71180941
3	71212417	71212618
3	71362439	71362687
3	71599809	71600008
3	72545213	72545564
3	73516062	73516716
3	73630350	73630615
3	75189565	75189766
3	76837153	76837479
3	77192099	77192793
3	77740355	77740553
3	78081456	78081677
3	79306475	79306680
3	80254566	80254880
3	80255016	80255350
3	80746066	80746384
3	80950112	80950333
3	83219487	83219685
3	85649782	85650150
3	86110805	86111003
3	86180028	86180226
3	86624785	86625147
3	92336754	92337022
3	92337080	92337350
3	93371597	93371803
3	93854341	93854613
3	97199441	97199643
3	97807320	97807542
3	97830723	97830949
3	99408367	99408565
3	101206351	101206549
3	101957064	101957262
3	103249452	103249818
3	105084265	105084573
3	107508767	107509042
3	107926574	107926779
3	109880879	109881091
3	111067353	111067584
3	111328212	111328458
3	111396411	111396609
3	112272595	112272793
3	112924277	112924548
3	113216753	113216951
3	115164948	115165178
3	116140322	116140572
3	117527891	117528133
3	119453854	119454052
3	120417257	120417491
3	121365204	121365402
3	122633329	122633527
3	125216824	125217022
3	126004580	126004791
3	126256752	126256962
3	128903907	128904108
3	129136184	129136452
3	129573424	129573725
3	130720611	130720820
3	131236959	131237858
3	131718396	131718788
3	132840425	132840623
4	180463	180661
4	523038	523282
4	1358473	1358671
4	3028847	3029120
4	3277168	3277366
4	3562191	3562393
4	4486651	4486901
4	4665257	4665493
4	6893092	6893290
4	7765163	7765538
4	8485751	8485949
4	8750489	8750702
4	8834763	8834961
4	11764557	11764755
4	14203891	14204159
4	14297639	14297837
4	15182126	15182609
4	15998874	15999176
4	19146570	19146903
4	19447097	19447296
4	21215497	21215785
4	28013993	28014234
4	29364229	29364427
4	31254601	31254805
4	32609618	32609885
4	32853614	32853812
4	34319372	34319592
4	34431579	34431781
4	34645558	34645811
4	34823777	34824063
4	34998311	34998572
4	35767810	35768112
4	35976742	35976940
4	41177504	41177721
4	41216038	41216289
4	41655630	41655828
4	42930955	42931183
4	45022660	45022902
4	45183194	45183392
4	45324014	45324215
4	46447197	46448128
4	46452886	46453526
4	46468841	46469042
4	46499177	46499375
4	46627724	46627922
4	46912369	46912632
4	48555664	48555944
4	50610594	50610792
4	51468794	51469005
4	52435281	52435481
4	53952984	53954294
4	54591363	54591638
4	55861491	55861750
4	55996676	55996912
4	56538175	56538378
4	60091288	60091576
4	60718870	60719093
4	61628494	61628776
4	62266900	62267170
4	63271119	63271396
4	63616142	63616354
4	64339886	64340084
4	64710684	64710918
4	68119759	68119957
4	69420886	69421084
4	70176575	70176890
4	72672146	72672344
4	74689592	74689790
4	74689892	74690134
4	76587169	76587397
4	77628431	77628629
4	77997001	77997212
4	78186058	78186256
4	78330730	78330928
4	78614287	78614485
4	79936503	79936701
4	80190703	80190945
4	80750878	80751141
4	81509789	81510087
4	81967347	81967552
4	82521331	82521577
4	83070104	83070382
4	83776423	83776727
4	84313732	84314060
4	84759059	84759271
4	84933705	84933920
4	85869395	85869593
4	89040240	89040452
4	89108282	89108581
4	90461698	90461896
4	90722137	90722384
4	91308979	91309215
4	92015755	92015953
4	92028341	92028844
4	93325318	93325531
4	95944814	95945052
4	96398661	96398980
4	96938106	96938348
4	97081198	97081401
4	97340939	97341149
4	97368866	97369064
4	99225339	99225633
4	99348392	99348639
4	99712130	99712328
4	99997532	99997730
4	100426109	100426416
4	100478982	100479180
4	101443578	101443776
4	103376827	103377187
4	103436605	103436803
4	103581367	103581787
4	104151751	104151951
4	106656597	106656811
4	107295451	107295722
4	107416847	107417082
4	107550309	107550507
4	108011457	108011655
4	108863047	108863273
4	109096711	109096930
4	109786218	109786416
4	110622075	110622333
4	111006895	111007102
4	111293803	111294078
4	112188859	112189139
4	112303337	112303550
4	117791910	117792297
4	119408471	119408669
4	120750093	120750305
4	120860737	120861009
4	121380803	121381037
4	121598554	121598771
4	122130876	122131090
4	122314295	122314493
4	122634888	122635220
4	122784850	122785048
4	122857791	122858041
4	122965392	122965618
4	124605375	124605573
4	124780124	124780322
4	126033216	126033414
4	126968479	126968682
4	127372383	127372581
4	130298342	130298612
4	130644868	130645103
5	716767	716971
5	758159	758392
5	985865	986100
5	2233616	2233835
5	4219372	4219615
5	4273280	4273523
5	4832227	4832429
5	6269337	6269580
5	7085449	7085647
5	7106447	7106666
5	7776808	7777128
5	11250912	11251131
5	12220819	12221018
5	13397319	13397548
5	13664878	13665145
5	13832532	13832730
5	13983471	13983669
5	14358425	14358623
5	14806741	14806991
5	15063835	15064110
5	15097718	15097916
5	15619372	15619679
5	17332313	17332652
5	18266455	18266658
5	18338712	18338920
5	18588421	18588702
5	18878579	18878863
5	19483895	19484251
5	19522480	19522678
5	20020467	20020713
5	20449343	20449694
5	21356564	21356871
5	21373062	21373337
5	21395441	21395664
5	22151059	22151285
5	22447453	22447696
5	26867590	26867808
5	27415662	27415886
5	29248194	29248392
5	35691988	35692382
5	37782873	37783097
5	39363671	39363892
5	39802830	39803045
5	39811786	39812493
5	39886569	39886824
5	39888164	39888423
5	39894988	39895224
5	39901898	39902110
5	39904925	39905262
5	39907687	39907896
5	39908518	39909044
5	39909733	39909938
5	39911490	39911692
5	39913137	39913483
5	39929634	39929914
5	39936297	39936500
5	39996719	39996974
5	39998748	39999065
5	40007547	40007907
5	40035706	40035904
5	40080992	40081193
5	40083813	40084119
5	40094951	40095149
5	40175239	40175449
5	40190826	40191108
5	40195776	40196561
5	40197128	40197810
5	40198050	40198271
5	40225030	40225328
5	40841830	40842086
5	41062135	41062333
5	41134774	41134976
5	41135252	41135488
5	43033852	43034229
5	44529770	44530017
5	45084549	45084760
5	46627031	46627299
5	48555486	48555778
5	49832844	49833068
5	51191086	51191294
5	55780799	55780997
5	56736850	56737111
5	57749796	57750008
5	58223628	58223848
5	61338041	61338239
5	62420235	62420525
5	62546254	62546574
5	62907106	62907304
5	63707563	63707768
5	63939919	63940185
5	64058500	64058844
5	64166862	64167060
5	67106515	67106713
5	67305060	67305359
5	69779154	69779435
5	71424191	71424447
5	71547629	71547827
5	72041275	72041505
5	73116357	73116555
5	73637321	73637572
5	74724809	74725033
5	76635401	76635713
5	78328314	78328514
5	78328760	78329024
5	79356007	79356273
5	79361305	79361561
5	79492530	79492801
5	81502251	81502449
5	82361614	82361850
5	87280123	87280774
5	88971499	88971823
5	89728084	89728314
5	90131448	90131723
5	90228163	90228651
5	90234467	90234724
5	90244858	90245124
5	90245631	90245922
5	90249033	90249250
5	90936506	90936704
5	91541090	91541313
5	94943579	94943777
5	95240926	95241128
6	30840	31104
6	33997	34241
6	38797	39033
6	353907	354195
6	455466	455721
6	464586	464785
6	1448433	1448658
6	1627589	1627797
6	2137273	2137471
6	2638086	2638384
6	4269620	4269833
6	5792004	5792337
6	6978624	6978822
6	7690776	7690993
6	9215874	9216072
6	9298933	9299149
6	9938987	9939185
6	9960696	9961032
6	10328391	10328820
6	10634861	10635059
6	12905421	12905619
6	15085672	15085870
6	18500092	18500333
6	18503621	18503821
6	18506206	18506448
6	18512068	18512322
6	18663837	18664035
6	18669637	18669843
6	18901164	18901362
6	19264615	19264823
6	19573782	19573980
6	20066519	20066763
6	21011871	21012104
6	21388824	21389040
6	22636443	22636662
6	23926608	23926806
6	28195429	28195637
6	29115417	29115631
6	29118259	29118630
6	29120548	29120772
6	29339694	29339922
6	31747254	31747515
6	32013960	32014158
6	32608364	32608572
6	33942097	33942295
6	34121233	34121445
6	34548508	34548706
6	36172981	36173195
6	36360465	36360726
6	37943653	37943851
6	38588684	38588898
6	38743870	38744078
6	38744694	38744913
6	38757672	38757908
6	38758720	38759060
6	38774519	38774794
6	38780960	38781429
6	38837374	38837601
6	38952295	38952493
6	38990679	38990891
6	39373693	39373891
6	40439447	40439660
6	40594661	40595137
6	40725470	40725670
6	41517789	41518100
6	41932049	41932247
6	42497451	42497656
6	42637821	42638040
6	43164878	43165113
6	44056776	44057080
6	44192596	44192794
6	44280127	44280554
6	45360616	45360862
6	47252948	47253170
6	48061627	48061856
6	48711641	48711839
6	48728982	48729180
6	49020604	49020841
6	49152340	49152627
6	49178607	49179107
6	49272829	49273147
6	49665501	49665850
6	49840245	49840443
6	50374000	50374211
6	51168615	51168945
6	51359727	51359946
6	51445079	51445371
6	52937614	52937856
6	53065465	53065699
6	53275262	53275686
6	53868870	53869122
6	54500556	54500810
6	54553319	54553517
6	54684896	54685094
6	54685875	54686201
6	54718541	54718805
6	54786024	54786270
6	54882222	54882448
6	55410369	55410567
6	55804828	55805114
6	55991330	55991654
6	56289542	56289779
6	56551590	56551788
6	56745994	56746222
6	56750654	56750868
6	58501625	58501855
6	58549894	58550248
6	58551173	58551484
6	58551610	58552887
6	58553396	58553712
6	59450482	59450690
6	59725736	59726008
6	60195672	60195918
6	60526917	60527115
6	62763836	62764121
6	62968160	62968478
6	63237796	63238168
6	63244704	63245037
6	63354501	63354737
6	64000803	64001199
6	64206868	64207237
6	65671831	65672043
6	65680715	65681021
6	66564182	66564380
6	66703025	66703223
6	66717363	66717735
6	66897111	66897309
6	67605502	67605876
6	67849220	67849418
6	68643647	68643908
6	68698879	68699607
6	68906985	68907183
6	69461614	69461812
6	69777539	69777737
6	69934649	69934847
6	70241506	70241963
6	71978307	71978505
6	73732114	73732312
6	74971107	74971374
6	75015362	75015669
6	76655106	76655351
6	77638255	77638453
6	77651905	77652123
6	77707901	77708119
6	78692486	78692813
6	82309154	82309495
6	83687699	83687948
6	83933628	83933827
6	83983130	83983535
6	84417995	84418193
6	85185672	85185903
6	85307157	85307355
6	86671663	86671881
6	87687456	87687658
6	88659846	88660044
6	90710775	90710995
6	90718067	90718362
6	91588498	91588696
6	91876966	91877164
6	95322070	95322286
6	96008698	96008896
6	96561688	96561893
6	97656833	97657070
6	98300634	98300867
6	98598230	98598523
6	100092780	100092986
6	100935821	100936070
6	101757450	101757677
6	101955832	101956103
6	102038873	102039140
6	102364306	102364505
6	105125623	105125821
6	110472177	110472399
6	111146274	111146726
6	112553813	112554041
6	114247605	114247824
6	116218260	116218549
6	116336043	116336241
6	119719234	119719449
6	120626340	120626607
6	121302337	121302535
6	122339324	122339522
6	123780112	123780399
6	126224489	126224687
6	126703028	126703752
6	127735476	127735685
6	127819174	127819372
6	128030205	128030507
6	128174345	128174549
6	128196987	128197185
6	130696171	130696460
6	133029956	133030160
6	136042061	136042259
6	136806051	136806263
6	137000311	137000509
6	139008894	139009129
6	139159836	139160231
6	141440878	141441091
6	142091224	142091422
6	144144943	144145205
6	144608247	144608492
6	144954397	144954631
6	146266382	146266635
6	146273285	146273508
6	146987433	146987654
6	153882240	153882452
6	155147518	155147736
6	158262038	158262368
6	158729415	158729613
6	161077293	161077491
6	163212011	163212455
6	164197310	164197521
6	164207963	164208190
6	164524104	164524365
6	164526719	164527101
6	164684595	164684836
6	164686122	164686413
6	165240575	165240773
6	165757320	165757523
6	165847774	165847972
6	166645027	166645301
6	166899230	166899428
6	167973871	167974220
6	168036835	168037067
6	168217161	168217395
6	168736480	168736678
6	170763430	170763888
7	319474	319808
7	527937	528175
7	978846	979115
7	2224241	2224439
7	4686827	4687061
7	5457135	5457333
7	7876523	7876721
7	8093488	8093836
7	10867770	10868404
7	11521145	11521343
7	11810583	11810781
7	13825861	13826059
7	13845930	13846134
7	15254571	15254772
7	15302126	15302357
7	21606230	21606428
7	23823797	23823995
7	24583127	24583385
7	24586774	24586978
7	24592033	24592313
7	24604449	24604669
7	24604742	24605189
7	24605284	24605529
7	24605661	24605883
7	24610723	24611215
7	24613427	24614110
7	24994248	24994477
7	25809107	25809392
7	27335251	27335467
7	27958995	27959410
7	28660728	28660926
7	28765321	28765676
7	28774013	28774277
7	29084471	29084669
7	29126994	29127225
7	29507654	29507852
7	29694412	29694678
7	29942792	29943048
7	30666862	30667060
7	31791392	31791592
7	31791698	31791896
7	32787836	32788112
7	34403501	34403717
7	35436697	35436895
7	35748027	35748225
7	36296697	36296957
7	36306354	36306552
7	36410375	36410624
7	36760749	36760953
7	37225034	37225332
7	38456416	38456629
7	38569434	38569799
7	40626278	40626476
7	43943322	43943534
7	47089303	47089502
7	47089622	47089856
7	47091891	47092132
7	47528915	47529274
7	49158429	49158627
7	49942673	49943155
7	51186030	51186482
7	51305831	51306029
7	54412999	54413232
7	54906794	54907143
7	55523451	55523649
7	55811606	55811820
7	56540323	56540532
7	57040775	57040973
7	57151067	57151324
7	57503603	57503869
7	60332652	60332853
7	61113456	61113694
7	69528178	69528376
7	69571541	69571871
7	73258513	73258717
7	74140825	74141023
7	74564783	74564981
7	75180954	75181243
7	75951068	75951314
7	76036180	76036590
7	76431781	76432056
7	77719405	77719603
7	78476420	78476761
7	78729260	78729794
7	79561480	79561694
7	80462961	80463164
7	80874416	80874652
7	81103738	81103944
7	81669604	81669905
7	83446726	83447384
7	85267475	85267715
7	86103522	86103802
7	86227773	86228050
7	88215464	88215742
7	88576434	88576639
7	89130817	89131015
7	89168135	89168342
7	89295326	89295524
7	89765721	89765961
7	90346502	90346709
7	90859738	90859936
7	91601606	91601804
7	92364512	92364710
7	92865199	92865437
7	93467498	93467701
7	95739591	95739847
7	96406532	96406731
7	96798329	96798557
7	98203712	98203910
7	98430081	98430644
7	98821829	98822233
7	99491197	99491395
7	99612335	99612533
7	100123363	100123649
7	101286755	101286993
7	104009367	104009565
7	104180403	104180725
7	104189640	104189850
7	106818116	106818324
7	108228397	108228617
7	109798706	109798904
7	111593116	111593314
7	112147023	112147252
7	112160540	112160738
7	112916180	112916446
7	113148415	113148637
7	116436445	116436662
7	116740096	116740331
7	116787266	116787473
7	117210467	117210665
7	117241821	117242121
7	117862569	117862839
7	118367012	118367228
7	118381667	118381998
7	118665225	118665508
7	120292520	120292781
7	120486727	120487083
7	120597030	120597284
7	121832068	121832297
8	955	1738
8	2237	2435
8	5583	5943
8	12224	12484
8	15834	16127
8	1387543	1387896
8	1626941	1627139
8	2405399	2405626
8	2650701	2650953
8	3797117	3797380
8	4191409	4191617
8	4265323	4265569
8	5311565	5311771
8	7385563	7385769
8	11818352	11818550
8	12106202	12106406
8	12487652	12487850
8	12590366	12590564
8	13047008	13047282
8	15316350	15316561
8	17580104	17580371
8	18360058	18360299
8	19413366	19413594
8	20492140	20492365
8	26483686	26483884
8	26535618	26535816
8	28716913	28717112
8	29190249	29190715
8	29414909	29415107
8	29453349	29453547
8	30463561	30463848
8	30759704	30760070
8	30840187	30840599
8	31384723	31384921
8	31747132	31747332
8	31841643	31841990
8	33284426	33284624
8	37975229	37975427
8	38850792	38850990
8	39077063	39077261
8	39612280	39612490
8	39706716	39706914
8	40145400	40145624
8	43745515	43745906
8	46620921	46621119
8	46817611	46817862
8	47607836	47608034
8	47686995	47687255
8	50152627	50152834
8	52714120	52714318
8	53116596	53116834
8	53280114	53280364
8	53792472	53792725
8	54371981	54372179
8	54379488	54379686
8	54589127	54589683
8	54590377	54590575
8	55875219	55875465
8	55931244	55931442
8	56382055	56382253
8	56608008	56608256
8	57998897	57999124
8	58160488	58160686
8	58816264	58816519
8	60006754	60007133
8	63674376	63674574
8	63711929	63712127
8	65826618	65826816
8	66207085	66207337
8	72504526	72504828
8	73137437	73137738
8	73137910	73138176
8	74439276	74439773
8	75402377	75402616
8	75542806	75543004
8	75656382	75656589
8	76270367	76270580
8	77433580	77433997
8	77557334	77557819
8	78756123	78756321
8	78854114	78854317
8	78950056	78950254
8	79277506	79277745
8	79863164	79863362
8	80092024	80092329
8	80115231	80115488
8	80229478	80229711
8	80304778	80305202
8	81748190	81748472
8	82044967	82045165
8	84224944	84225158
8	84744077	84744275
8	86690534	86690796
8	87069308	87069555
8	88027595	88027847
8	94479006	94479230
8	94642798	94642996
8	95949391	95949625
8	95974908	95975162
8	96855957	96856229
8	98719851	98720049
8	99782672	99782984
8	100021178	100021376
8	100387438	100387719
8	100847954	100848152
8	102387957	102388385
8	103120906	103121118
8	104547208	104547499
8	104560481	104560679
8	105121360	105121558
8	106705586	106705807
8	108790322	108790520
8	110089769	110089967
8	110200454	110200653
8	110201752	110201999
8	111956778	111956976
8	112246112	112246310
8	112452647	112452848
8	112717420	112717642
8	115302471	115302669
8	116341391	116341605
8	118689405	118689610
8	119798521	119798719
8	122811879	122812083
8	128868963	128869161
8	129214928	129215126
8	129568618	129568876
8	130283126	130283395
8	130347771	130348001
8	130466267	130466483
8	131061508	131061706
8	131320525	131320815
8	131874078	131874276
8	133787229	133787529
8	135431511	135431759
8	135844357	135844598
8	135916817	135917015
8	136557180	136557438
8	137405534	137405732
8	138514176	138514382
8	138950124	138950391
9	104773	104971
9	1336287	1336485
9	1824564	1824762
9	2329943	2330141
9	2341418	2341642
9	3181433	3181631
9	4699985	4700596
9	4700882	4701267
9	4701599	4701830
9	4701928	4702170
9	5258328	5258526
9	5297461	5297729
9	5657627	5657825
9	7202454	7202796
9	8504402	8504604
9	8513014	8513242
9	8586551	8586749
9	8761793	8761991
9	9199484	9199721
9	9329017	9329293
9	9920568	9920833
9	9968193	9968506
9	9980973	9981171
9	10454102	10454300
9	10970965	10971163
9	11676761	11676976
9	12928501	12928722
9	15232648	15233062
9	19593924	19594234
9	19609036	19609321
9	20167443	20167641
9	20264732	20264936
9	21241106	21241309
9	25422889	25423087
9	26403432	26403705
9	26874135	26874363
9	28021237	28021435
9	30525859	30526057
9	32810793	32811016
9	33031535	33031854
9	33041382	33041673
9	35903949	35904198
9	35960117	35960376
9	36620598	36620910
9	37591623	37591854
9	39368398	39368597
9	39453188	39453386
9	39770291	39770489
9	40775285	40775532
9	42049454	42049652
9	42335232	42335613
9	43617514	43617712
9	44471731	44471962
9	45252590	45252788
9	45335745	45335943
9	46276973	46277205
9	46590274	46590472
9	47422431	47422678
9	48095212	48095431
9	48700174	48700396
9	48777611	48777844
9	50532065	50532263
9	51918654	51918919
9	52302656	52302947
9	52564942	52565140
9	52726504	52726950
9	52841871	52842132
9	53851963	53852161
9	53882182	53882443
9	54035486	54035700
9	55947624	55947954
9	57393722	57393920
9	58460409	58460607
9	59282072	59282375
9	59657996	59658194
9	61272371	61272700
9	62326832	62327030
9	62809584	62810039
9	62819741	62819939
9	63057715	63057951
9	63145456	63145657
9	63147516	63147720
9	63231747	63231945
9	63233931	63234340
9	63304698	63304958
9	63305148	63305555
9	63362578	63362981
9	63363095	63363374
9	63363656	63363889
9	63377146	63377664
9	63378729	63378942
9	63389884	63390123
9	63391634	63391864
9	63394332	63394805
9	63396567	63396771
9	63412376	63412621
9	63423541	63424245
9	63424706	63424922
9	63428528	63428853
9	63431989	63432192
9	63473259	63473471
9	63473855	63474126
9	63475436	63475641
9	63479799	63480037
9	63644596	63644803
9	65066764	65066962
9	65429158	65429356
9	66285693	66285891
9	68508750	68509019
9	68983278	68983489
9	69321360	69321566
9	69847412	69847612
9	70131334	70131538
9	71895585	71895783
9	72193571	72193920
9	74519326	74519524
9	75260282	75260554
9	76510907	76511105
9	76583564	76583818
9	76674364	76674562
9	81837549	81837799
9	82225818	82226062
9	82694275	82694499
9	86071768	86072235
9	87021743	87022140
9	87086484	87086789
9	88785596	88785960
9	90337225	90337423
9	90980482	90980680
9	91643694	91643908
9	91832712	91832935
9	92124453	92124725
9	92934917	92935184
9	93307834	93308249
9	97758200	97758414
9	98229466	98229664
9	100496032	100496439
9	100615869	100616085
9	102348692	102348890
9	102536294	102536510
9	102936180	102936378
9	103056374	103056577
9	104910574	104910838
9	105388845	105389050
9	105985186	105985479
9	106161932	106162439
9	106436699	106436913
9	106448604	106448817
9	106965619	106966178
9	107688216	107688414
9	107819743	107819998
9	108320226	108320448
9	109260364	109260562
9	109384434	109384648
9	109582141	109582361
9	111874453	111874669
9	112471028	112471246
9	112931846	112932071
9	114035052	114035270
9	115760675	115760948
9	116170795	116170993
9	116402250	116402463
9	117064097	117064384
9	117460384	117460711
9	118670440	118670638
9	118900364	118900602
9	119696842	119697060
9	121708786	121708984
9	121767012	121767261
9	122870941	122871200
9	123032563	123032761
9	124799396	124799638
9	127539985	127540183
9	128447914	128448112
9	129542743	129542941
9	131076350	131077107
9	134905455	134905664
9	135812746	135813013
9	135884786	135884988
9	135941651	135941942
9	136212553	136212751
9	136716443	136716681
9	137619765	137619963
9	139383223	139383488
9	139498786	139499015
9	139506034	139506277
9	139507401	139507640
10	264908	265190
10	1766394	1766624
10	2315329	2315765
10	2500310	2500604
10	5098204	5098435
10	5684954	5685168
10	6903871	6904078
10	8267949	8268147
10	8552094	8552305
10	9214455	9214753
10	9586923	9587121
10	10737008	10737206
10	10812347	10812545
10	11138142	11138445
10	11835606	11835826
10	11861074	11861349
10	12401992	12402218
10	12431749	12431947
10	12555442	12555668
10	12688971	12689194
10	13381541	13381748
10	13711327	13711525
10	13897874	13898154
10	13976045	13976282
10	14006618	14006849
10	14597209	14597407
10	15206433	15206631
10	15264328	15264526
10	15296021	15296270
10	17365304	17365630
10	17683992	17684261
10	19170319	19170536
10	19261110	19261308
10	19282387	19282641
10	19285228	19285797
10	19286278	19286843
10	19414825	19415044
10	19416293	19416602
10	19428384	19428588
10	19451961	19452159
10	19456861	19457117
10	19483304	19483678
10	19484548	19484814
10	19869718	19870007
10	20967143	20967367
10	21081492	21081703
10	21181592	21181817
10	21435253	21435451
10	22587287	22587485
10	22711343	22711560
10	22796445	22796732
10	23087561	23087760
10	24464876	24465083
10	24615703	24615993
10	24923536	24923820
10	24930354	24930568
10	24944413	24944680
10	24952754	24953888
10	24954758	24955177
10	24959676	24959981
10	24961000	24962044
10	24966491	24966728
10	24974034	24974483
10	24974776	24975332
10	24975491	24976082
10	25083194	25083456
10	25202201	25202399
10	25314931	25315129
10	25635895	25636251
10	25707290	25707621
10	26428701	26428899
10	28468804	28469090
10	28783144	28783658
10	29065854	29066052
10	29174469	29174699
10	30975268	30975498
10	30975944	30976157
10	32079916	32080166
10	32160541	32160802
10	32170285	32170483
10	35076040	35076266
10	35475508	35475711
10	38243310	38243508
10	38505986	38506208
10	39798223	39798533
10	39875198	39876039
10	40154032	40154598
10	41804491	41804748
10	42693408	42693674
10	42789373	42789571
10	42980453	42980683
10	43928654	43928852
10	44367974	44368172
10	44594846	44595046
10	47609042	47609278
10	47840345	47840548
10	48667590	48667800
10	55700324	55700522
10	56156513	56156775
10	56285592	56285790
10	57829382	57829580
10	57993101	57993476
10	59251308	59251539
10	59649752	59650026
10	62279914	62280210
10	62303778	62304049
10	62720626	62721284
10	64059501	64059789
10	65108366	65108594
10	65267434	65267736
10	66978154	66978370
10	68840944	68841142
10	68872462	68872776
10	69177811	69178122
10	69293548	69293754
11	289157	289355
11	410236	410529
11	630498	630733
11	2096493	2096709
11	2651520	2651725
11	2768479	2768703
11	2784025	2784257
11	7398336	7398534
11	7759231	7759429
11	8834753	8835051
11	10464099	10464297
11	11710138	11710387
11	14927077	14927399
11	15141081	15141322
11	15409585	15409783
11	15904636	15904834
11	16375109	16375429
11	18517838	18518328
11	22144867	22145065
11	22254246	22254444
11	22687809	22688037
11	26385199	26385618
11	27363244	27363473
11	27558723	27558921
11	35640890	35641096
11	35746218	35746489
11	35805319	35805584
11	35870791	35871613
11	39226301	39226499
11	41327668	41327899
11	42119148	42119432
11	46285615	46285854
11	49088719	49088917
11	50883526	50883901
11	51289962	51290230
11	51863213	51863485
11	53310410	53310608
11	59886323	59886553
11	64234060	64234274
11	64265767	64265965
11	64272429	64272627
11	64985002	64985271
11	65229753	65230209
11	65364993	65365191
11	65604612	65604810
11	66772899	66773097
11	66948866	66949093
11	67501350	67501548
11	67550446	67550725
11	67597527	67597813
11	68445507	68445705
11	70043815	70044013
11	70318510	70318753
11	70828651	70828893
11	70920716	70921017
11	72966688	72966970
11	73534297	73534747
11	73604331	73604650
11	74208739	74208954
11	76751823	76752207
11	76874755	76875186
11	77270535	77270824
11	78118178	78118433
12	160985	161183
12	202113	202528
12	629101	629330
12	1204824	1205126
12	1491224	1491422
12	1802696	1802916
12	3559539	3559784
12	3643456	3643654
12	3988206	3988473
12	4925375	4925573
12	5193916	5194144
12	5564941	5565218
12	5714708	5714906
12	6662508	6662706
12	7264316	7264645
12	7491710	7491908
12	7819729	7820142
12	7991438	7991767
12	8562850	8563075
12	9133988	9134186
12	9192939	9193172
12	9478188	9478547
12	9562885	9563130
12	11496002	11496200
12	11715050	11715469
12	11805182	11805475
12	12219328	12219526
12	13011458	13011656
12	14548325	14548566
12	14572259	14572618
12	14764408	14764694
12	15192092	15192314
12	15350895	15351255
12	16810646	16810852
12	17211358	17211642
12	17863049	17863262
12	17946496	17946713
12	18077749	18078163
12	19701298	19701496
12	19787980	19788226
12	20220771	20220969
12	20364158	20364356
12	20426949	20427147
12	20662082	20662280
12	20796263	20796858
12	21358606	21358833
12	21436073	21436271
12	23723335	23723541
12	23804713	23804941
12	24153831	24154142
12	24351172	24351370
12	24747354	24747552
12	25346061	25346261
12	25971384	25971620
12	26768684	26768924
12	27369707	27369952
12	27370186	27370388
12	27988345	27988563
12	28191504	28191728
12	30117995	30118213
12	30290369	30290645
12	30291075	30291293
12	32061299	32061497
12	32125871	32126069
12	32891637	32891910
12	33376043	33376241
12	34771129	34771560
12	35433097	35433342
12	36111415	36111727
12	36943098	36943311
12	37728895	37729137
12	38011438	38011636
12	38074541	38074739
12	38174610	38174927
12	39982025	39982255
12	42249868	42250066
12	42529668	42529866
12	45221851	45222067
12	45506507	45506705
12	46996462	46996660
12	47061612	47061853
12	47528626	47528854
12	47818248	47818446
12	49918731	49918929
12	50509374	50509631
12	50992954	50993152
12	51312392	51312599
12	51527029	51527326
12	51949169	51949434
12	52659594	52659926
12	52804800	52805008
12	52805181	52805379
12	52868223	52868474
12	52903492	52903771
12	52954595	52954793
12	53376828	53377085
12	53438937	53439158
12	54697339	54697566
12	55341343	55341552
12	56385128	56385326
12	57402408	57402639
12	57791166	57791404
12	58134556	58134754
12	58539170	58539368
12	58564741	58564979
12	58568406	58568604
12	58676962	58677232
12	60651805	60652019
12	61585297	61585506
12	61597855	61598548
13	13721	13962
13	15288	15551
13	23275	23527
13	23637	23837
13	35603	35819
13	42285	42558
13	43971	44171
13	44912	45124
13	55464	55735
13	60888	61131
13	126872	127200
13	137681	137926
13	139632	139872
13	140832	141247
13	598232	598492
13	1417700	1417898
13	1709131	1709329
13	2714657	2714874
13	4084486	4084684
13	4858751	4858949
13	5550943	5551159
13	6257433	6257637
13	7537810	7538025
13	7650180	7650378
13	10454811	10455025
13	13697791	13698006
13	14300990	14301298
13	14656241	14656520
13	15288904	15289149
13	17124880	17125079
13	17497110	17497352
13	18539186	18539384
13	18557952	18558252
13	18649679	18649913
13	19935391	19935629
13	21077296	21077862
13	21877601	21877799
13	23994264	23994462
13	24874065	24874286
13	25163568	25163970
13	25665213	25665575
13	26228747	26228945
13	26385591	26385867
13	26669155	26669353
13	26805719	26805958
13	27558510	27558708
13	27928061	27928259
13	28548122	28548320
13	29211028	29211235
13	29996015	29996305
13	30601900	30602227
13	31015390	31015609
13	31491939	31492208
13	31564193	31564467
13	31564845	31565086
13	32195347	32195556
13	32320029	32320230
13	32444812	32445018
13	33320906	33321110
13	33438481	33438683
13	33658082	33658329
13	34826389	34826587
13	35401816	35402029
13	35975092	35975301
13	35975360	35975572
13	37153861	37154121
13	38708103	38708322
13	39088971	39089275
13	40210299	40210644
13	42884735	42884933
13	43728788	43728986
13	46482553	46482751
13	47743350	47743548
13	50142204	50142439
13	50581489	50581741
13	53700330	53700758
13	54157712	54157958
13	54266056	54266392
13	54904307	54904506
13	55240529	55240738
13	57037414	57037612
13	61730495	61730779
13	62161339	62161537
13	62351586	62351895
13	62784830	62785028
13	63031404	63031728
13	63497247	63497682
13	64066493	64066751
13	65502273	65502519
13	67889142	67889340
13	68477857	68478182
13	68546589	68546806
[truncated: 802 more rows]
