# Supplementary material for: Chromatin accessibility landscape of stromal subpopulations reveals distinct metabolic and inflammatory features of porcine subcutaneous and visceral adipose tissue
Source: PeerJ. 2022 May 24;10:e13250. doi: 10.7717/peerj.13250 (PMC9138157; doi:10.7717/peerj.13250)
Supplement: Supplemental Information 2 [file peerj-10-13250-s002.xlsx]

## Sheet: Distal promoter DHSs in SAT
Chromosome	Start site	End site
1	4247387	4247585
1	4893154	4893352
1	10233051	10233249
1	43920377	43920575
1	43930094	43930431
1	51428455	51428837
1	61598242	61598462
1	67306152	67306366
1	82738283	82738550
1	106967940	106968185
1	107311780	107312119
1	126824856	126825054
1	128483309	128483574
1	128808961	128809235
1	214192199	214192397
1	243153870	243154068
1	247101548	247101761
1	250595834	250596032
1	262946284	262946482
2	9529141	9529447
2	25911055	25911265
2	45782787	45783067
2	49156542	49156749
2	52272017	52272219
2	58532772	58532970
2	75473518	75473760
2	76504614	76504821
2	82304082	82304309
2	115569469	115569712
3	5066618	5066866
3	6918707	6918921
3	8223701	8223913
3	10416174	10416570
3	17710858	17711066
3	25048216	25048474
3	38040563	38040761
3	38063102	38063448
3	41850719	41850940
3	52307293	52307491
3	73516075	73516655
3	118144536	118144774
3	121480697	121480944
3	126063376	126063627
3	130590146	130590369
4	3061126	3061326
4	3061546	3061808
4	16101194	16101425
4	68658210	68658426
4	82521328	82521539
4	88509262	88509460
4	92924399	92924628
4	96398605	96398924
4	97162819	97163250
4	119786000	119786198
4	122956924	122957122
5	758124	758322
5	15855886	15856084
5	69878899	69879104
5	88508276	88508474
5	90131518	90131792
5	92125489	92125755
6	3691047	3691325
6	13456455	13456678
6	31030855	31031073
6	32044121	32044359
6	42717789	42717987
6	43927738	43927936
6	44753265	44753465
6	45335178	45335376
6	45497153	45497351
6	49562754	49562959
6	49665413	49665754
6	49840362	49840661
6	51113743	51113960
6	58458032	58458274
6	63244747	63244973
6	68698907	68699146
6	68699206	68699533
6	74799097	74799306
6	76024081	76024279
6	77397216	77397490
6	78692482	78692700
6	79738860	79739113
6	81773211	81773445
6	84866850	84867048
6	134183025	134183256
6	144144829	144145205
7	527946	528224
7	30307922	30308244
7	65302695	65303074
7	86227768	86228047
7	98135554	98135752
7	112146980	112147296
7	115271523	115271721
7	121720805	121721015
8	945	1735
8	2194	2440
8	5591	5944
8	12222	12480
8	3946207	3946405
8	4392526	4392739
8	20453135	20453395
8	27967704	27967916
8	33729299	33729612
8	53792464	53792722
8	65826624	65826835
8	130676432	130676711
9	8211994	8212245
9	9775886	9776188
9	15232647	15233057
9	64054561	64054778
9	75272722	75272934
9	86071823	86072233
9	94776521	94776723
9	112914648	112914846
9	134905392	134905695
10	2500409	2500607
10	32101352	32101616
10	39875192	39876039
10	45456268	45456495
10	59649750	59650103
10	68756877	68757077
11	14766115	14766313
11	16761307	16761515
11	70920788	70920986
11	76409272	76409470
12	759125	759324
12	3988336	3988572
12	4533077	4533275
12	21337692	21337950
12	26622732	26623121
12	42115275	42115473
12	57031101	57031307
12	57036485	57036708
13	23865185	23865404
13	31564202	31564465
13	31564646	31565204
13	43887221	43887419
13	92454156	92454447
13	97014199	97014524
13	170772060	170772258
13	177288678	177288899
13	205320367	205320588
14	8371718	8371916
14	24248345	24248543
14	24871634	24871834
14	30530461	30530727
14	30977454	30977737
14	34321775	34322032
14	37770997	37771195
14	50347079	50347430
14	56625039	56625237
14	61629616	61629814
14	105169716	105169976
14	141621023	141621221
15	21084	21408
15	21507	21756
15	23826	24122
15	26348	26975
15	33057	33262
15	34408	34624
15	6166908	6167106
15	25067887	25068085
15	80700352	80700550
15	95648784	95649055
15	106997680	106997960
16	23276	24058
16	77083352	77083590
17	5817501	5817699
17	19639919	19640121
17	32564593	32564870
17	33670908	33671276
17	58359928	58360126
17	63366639	63366837
18	44264554	44264795
18	54615145	54615366
X	22068677	22069335
X	42846446	42846644
X	45802479	45802893
X	59308536	59308734
X	119627812	119628128
X	121608058	121608325

## Sheet: Proximal promoter DHSs in SAT
Chromosome	Start site	End site
1	2374665	2375023
1	2541118	2541646
1	3119990	3120235
1	5465201	5465620
1	7589323	7589600
1	7589894	7590181
1	7651502	7651803
1	12297541	12297741
1	14795397	14795751
1	18512939	18513295
1	19612787	19613069
1	19756119	19756398
1	21231142	21231340
1	21801574	21801824
1	26489480	26489991
1	28566085	28566510
1	28968695	28968911
1	30923379	30923767
1	35926912	35927110
1	37023893	37024262
1	40180215	40180580
1	42729646	42729989
1	43214959	43215259
1	43392477	43392896
1	44186002	44186443
1	44239310	44239579
1	45170251	45170515
1	50781482	50781788
1	54400787	54401003
1	54633671	54634007
1	56070021	56070224
1	57061977	57062212
1	57127991	57128354
1	57129206	57129404
1	57364178	57364443
1	57654453	57654795
1	63638626	63638844
1	64459728	64460035
1	66454777	66454976
1	72311782	72312002
1	72520132	72520528
1	73162352	73162550
1	73821330	73821528
1	74078749	74078947
1	74180866	74181295
1	74348989	74349187
1	74626982	74627180
1	75078909	75079107
1	75170302	75170696
1	77159169	77159597
1	82161428	82161705
1	83137076	83137512
1	85539709	85540022
1	90650561	90650877
1	92286799	92287068
1	92421727	92421974
1	99940070	99940480
1	103794090	103794372
1	106013284	106013615
1	106898231	106898460
1	107325076	107325358
1	107583381	107583610
1	107689878	107690120
1	108206024	108206309
1	108763087	108763320
1	109010536	109010776
1	109931161	109931496
1	111375259	111375508
1	112344019	112344293
1	112677768	112678061
1	113084932	113085800
1	113258632	113258888
1	113288928	113289242
1	115056367	115056609
1	119758902	119759121
1	119948652	119948850
1	120945810	120946099
1	121145879	121146364
1	121376139	121376352
1	122139078	122139350
1	122633554	122633823
1	123461701	123461995
1	124043207	124043435
1	126236681	126236928
1	127237975	127238508
1	127767490	127767850
1	127814118	127814316
1	127936755	127937041
1	128083973	128084177
1	128489408	128489951
1	128641390	128641596
1	129942662	129942902
1	130112204	130112566
1	130516505	130516757
1	130746842	130747040
1	130753023	130753222
1	130873645	130873843
1	131241552	131241800
1	139191283	139191568
1	139804786	139804984
1	143540745	143540974
1	145707361	145707559
1	146221606	146222008
1	149584172	149584412
1	149737373	149737571
1	153987927	153988284
1	154919174	154919443
1	158862546	158862923
1	159022134	159022337
1	161321214	161321500
1	162144658	162144999
1	163222082	163222304
1	163790129	163790476
1	163857904	163858180
1	165192909	165193114
1	166126144	166126355
1	167857654	167857905
1	169596404	169596885
1	169801602	169801827
1	175145749	175145947
1	179456735	179456964
1	179686670	179686954
1	179713126	179713377
1	180015041	180015239
1	180069108	180069392
1	180830074	180830311
1	180933806	180934045
1	181516118	181516316
1	182202963	182203176
1	182318025	182318450
1	182423272	182423470
1	182605213	182605621
1	183863178	183863383
1	184378936	184379287
1	185397672	185397870
1	186429977	186430257
1	187384854	187385381
1	188335144	188335361
1	188582278	188582661
1	189248704	189249016
1	189923225	189923591
1	190624941	190625316
1	190677676	190677991
1	191218558	191218756
1	194439753	194439968
1	194504771	194504998
1	200760764	200760971
1	201591704	201591963
1	202258729	202259031
1	203683814	203684038
1	207252364	207252574
1	208174207	208174638
1	216494650	216494909
1	217001958	217002437
1	217204887	217205149
1	219815351	219815563
1	222524590	222524806
1	225042253	225042610
1	225713786	225714077
1	228091992	228092306
1	228142111	228142362
1	230069227	230069438
1	231142676	231143038
1	234370634	234370925
1	235869633	235869930
1	236339894	236340143
1	238177375	238177623
1	239492666	239492921
1	240859928	240860305
1	241657302	241657635
1	243225611	243225950
1	248447838	248448074
1	249905199	249905587
1	252452971	252453231
1	252651558	252652013
1	253092901	253093170
1	253124304	253124506
1	253393768	253394096
1	254027352	254027678
1	255151814	255152049
1	260756847	260757188
1	261256690	261256892
1	261407574	261407804
1	262356012	262356551
1	263821875	263822073
1	265866998	265867386
1	265934844	265935237
1	267480542	267480884
1	267772291	267772554
1	267924869	267925354
1	268115993	268116195
1	268237422	268237651
1	268266296	268266566
1	268465766	268466015
1	268530723	268530921
1	268531458	268531768
1	268894164	268894372
1	268935727	268936022
1	269056147	269056345
1	269259347	269259671
1	269374709	269374978
1	269455400	269455661
1	270748420	270748618
1	272170649	272171024
1	272686238	272686436
2	1625637	1625873
2	1642540	1642868
2	3165381	3165702
2	3194699	3194939
2	4194419	4194652
2	4523322	4523664
2	4682017	4682296
2	4788269	4788750
2	5057026	5057342
2	5357606	5357855
2	5480567	5481071
2	5745143	5745584
2	6411664	6412006
2	6886494	6886692
2	7390723	7391257
2	8354847	8355169
2	8919027	8919254
2	9119619	9119834
2	9162963	9163246
2	9947580	9947800
2	10121567	10121775
2	10614083	10614513
2	13275959	13276294
2	13285112	13285351
2	14895866	14896368
2	14982917	14983169
2	15368984	15369182
2	16164142	16164340
2	16343919	16344117
2	16620233	16620631
2	16772055	16772266
2	18611688	18612000
2	24602570	24603098
2	26094792	26095126
2	26533762	26534016
2	26826955	26827153
2	27213432	27213703
2	27684822	27685252
2	27769216	27769437
2	32984051	32984365
2	39032729	39033045
2	40310468	40310672
2	40900263	40900502
2	41075461	41075694
2	42364465	42364673
2	44740005	44740433
2	45605062	45605321
2	46025089	46025526
2	46670312	46670766
2	48666239	48666600
2	48729103	48729348
2	49231811	49232033
2	49894573	49894895
2	50812180	50812402
2	51153382	51153715
2	51247437	51247799
2	51276176	51276437
2	51671487	51671697
2	52312162	52312482
2	58267363	58267698
2	58517315	58517815
2	58801895	58802220
2	59013350	59013677
2	59276974	59277325
2	59530872	59531163
2	59602858	59603146
2	60378731	60378994
2	60567412	60567769
2	60961242	60961440
2	60983987	60984335
2	61037664	61037885
2	61062855	61063053
2	61105040	61105390
2	61273041	61273361
2	61450305	61450887
2	61470630	61471017
2	62222059	62222540
2	64761419	64761910
2	64781289	64781682
2	64835776	64835974
2	65074516	65074850
2	65173369	65173663
2	65213516	65213760
2	65372037	65372306
2	65938719	65938917
2	66102100	66102389
2	66291072	66291289
2	68715740	68716034
2	69413778	69414010
2	69473782	69474017
2	69601531	69601897
2	70877410	70877676
2	71271454	71271970
2	71365655	71365975
2	72656402	72656848
2	72703704	72703914
2	72780645	72781065
2	72949749	72950105
2	73062933	73063135
2	73334370	73334616
2	73889730	73890349
2	74045121	74045439
2	74134597	74134845
2	74356992	74357454
2	74414207	74414536
2	74455722	74455944
2	74626626	74626874
2	74729670	74729963
2	74746526	74746781
2	75098566	75098802
2	75146735	75146996
2	75550690	75550971
2	76428266	76428542
2	76475320	76475667
2	76609694	76610072
2	76657884	76658082
2	76679595	76679815
2	76989173	76989389
2	77211961	77212159
2	77249290	77249591
2	77323918	77324150
2	77330616	77330855
2	77687302	77687645
2	77743370	77743581
2	78338204	78338402
2	78876665	78876877
2	78915668	78915936
2	79511913	79512160
2	79549774	79549972
2	79729269	79729491
2	80194075	80194281
2	80223169	80223367
2	80246930	80247164
2	80396239	80396437
2	80527343	80527595
2	80919108	80919437
2	81454094	81454514
2	81658720	81658982
2	82660426	82660624
2	83745037	83745390
2	84379910	84380161
2	84537815	84538220
2	85890324	85890522
2	87142668	87142897
2	87498573	87498804
2	89045522	89045720
2	90262979	90263241
2	90263301	90263523
2	97703715	97704011
2	101919954	101920221
2	102591233	102591450
2	103255613	103255821
2	113774179	113774438
2	116256896	116257212
2	116804546	116804744
2	116901246	116901456
2	117235174	117235388
2	117837838	117838366
2	119722663	119723190
2	119804318	119804615
2	126271148	126271405
2	129709526	129709834
2	130026343	130026719
2	131016278	131016476
2	131856913	131857283
2	133951381	133951590
2	135283466	135284108
2	135345552	135345755
2	136475901	136476156
2	136522608	136522806
2	136883790	136884121
2	136957586	136957784
2	137623797	137623999
2	140324343	140324615
2	140330861	140331086
2	140504133	140504469
2	140532074	140532354
2	141117871	141118214
2	141397660	141398048
2	141878903	141879297
2	142165922	142166423
2	142320555	142320899
2	142360988	142361189
2	143124063	143124317
2	143271026	143271357
2	144300859	144301388
2	147554146	147554481
2	150662204	150662644
2	151672219	151672419
3	1720801	1721024
3	1902917	1903198
3	3622524	3622731
3	3716198	3716440
3	3799996	3800280
3	4643547	4643770
3	5048261	5048669
3	6442269	6442467
3	6504619	6504851
3	7180632	7180893
3	7571785	7572103
3	7982697	7982931
3	8155030	8155261
3	8357193	8357396
3	8467947	8468290
3	8511333	8511613
3	9994726	9994965
3	10270738	10270981
3	10609803	10610084
3	16160536	16160793
3	16393775	16394064
3	16983420	16983878
3	17386226	17386553
3	17635756	17636019
3	17743816	17744220
3	18178186	18178528
3	18467605	18467814
3	18609771	18610069
3	19368251	19368449
3	19559377	19559713
3	22586706	22586915
3	22695658	22695903
3	24814997	24815292
3	26382769	26382970
3	26653641	26653920
3	28578355	28578680
3	33655223	33655618
3	33892339	33892748
3	34055386	34055588
3	37443052	37443256
3	37555119	37555762
3	38753722	38754034
3	39181319	39181616
3	39274854	39275428
3	39512557	39512834
3	39776489	39776880
3	40016751	40016949
3	40092193	40092680
3	40184526	40184804
3	40256915	40257234
3	40308089	40308293
3	41208724	41208940
3	41344230	41344529
3	41571677	41571926
3	42632911	42633214
3	42633355	42633580
3	43321153	43321479
3	43915609	43915807
3	44022546	44022825
3	44148823	44149045
3	44327698	44327921
3	45690718	45690940
3	46546723	46547008
3	46547232	46547590
3	46901624	46902011
3	46992544	46992971
3	47470554	47470752
3	47704744	47705015
3	49681326	49681605
3	53148922	53149261
3	54775505	54775757
3	54930658	54930966
3	55676786	55677067
3	55834229	55834427
3	56276951	56277149
3	56632081	56632385
3	56762135	56762457
3	57386796	57387101
3	57423692	57424021
3	57928226	57928424
3	58096598	58097000
3	58206842	58207075
3	58354833	58355152
3	58575034	58575316
3	59202268	59202546
3	59587337	59587535
3	67611082	67611348
3	68117141	68117352
3	68231652	68231854
3	68643278	68643525
3	71452315	71452539
3	72289484	72289911
3	72545151	72545779
3	72619496	72619765
3	72794110	72794332
3	73028618	73028824
3	74004315	74004655
3	76728992	76729390
3	76837153	76837496
3	76901170	76901419
3	77191909	77192791
3	77293444	77293761
3	77740215	77740510
3	78031735	78031969
3	78440621	78440869
3	80033864	80034129
3	80254587	80255096
3	86179938	86180414
3	86784292	86784490
3	87231341	87231539
3	92227432	92227898
3	92336981	92337330
3	92814082	92814356
3	93371545	93371758
3	93854318	93854549
3	96317153	96317556
3	96872109	96872339
3	98155708	98155906
3	100887044	100887260
3	101382732	101383032
3	101957627	101957921
3	102425472	102425757
3	103249479	103249970
3	106061326	106061768
3	107508647	107509102
3	107542045	107542243
3	109196512	109196840
3	110474692	110474916
3	111328256	111328929
3	111747924	111748220
3	111781575	111781780
3	111919860	111920094
3	112272473	112272754
3	112924193	112924519
3	113044776	113045021
3	113229229	113229427
3	113758872	113759083
3	114250357	114250555
3	114250947	114251396
3	114605577	114605827
3	114713928	114714332
3	114722061	114722436
3	124196188	124196403
3	125352089	125352291
3	125352951	125353170
3	125751787	125752012
3	126220203	126220578
3	126429826	126430145
3	126738637	126738898
3	126795365	126795608
3	127503171	127503452
4	3028608	3028861
4	14297692	14297890
4	14700147	14700345
4	15182232	15182618
4	15998710	15999257
4	16287628	16287826
4	20644729	20644954
4	21215383	21215777
4	28203312	28203656
4	32701417	32701666
4	34429797	34430016
4	34431536	34431987
4	34645543	34645799
4	34823448	34823931
4	35767795	35768156
4	38716650	38716848
4	39113308	39113506
4	41534887	41535316
4	41985707	41985952
4	42162328	42162709
4	42777832	42778246
4	42930990	42931290
4	45793140	45793510
4	46912325	46912553
4	51468735	51469126
4	57819762	57819960
4	59251991	59252421
4	62139831	62140168
4	64710485	64710918
4	64955570	64955770
4	67465405	67465659
4	68119714	68119986
4	72881983	72882376
4	75646035	75646654
4	77109433	77109631
4	78098828	78099137
4	80190656	80191004
4	80932406	80932673
4	81509843	81510218
4	82734404	82734602
4	82794490	82794765
4	83070104	83070302
4	83309544	83309777
4	83776532	83776805
4	87743090	87743311
4	87993839	87994188
4	89311183	89311394
4	89326640	89326881
4	89424889	89425087
4	89500356	89500554
4	90214902	90215176
4	90393369	90393615
4	90721781	90721979
4	90722035	90722401
4	92964717	92964985
4	93495867	93496104
4	93733744	93734027
4	93975285	93975532
4	94514787	94514985
4	94661533	94661731
4	95519703	95519998
4	95549596	95549794
4	95746581	95746804
4	95944824	95945062
4	97958790	97959186
4	98062190	98062461
4	98333337	98333576
4	98562170	98562423
4	98804708	98804953
4	99348363	99348599
4	100377970	100378168
4	100479103	100479342
4	101521646	101521893
4	103376911	103377205
4	106058142	106058353
4	106656512	106656877
4	107120378	107120590
4	107416807	107417137
4	107821715	107822003
4	109722784	109723163
4	109786339	109786567
4	110695228	110695479
4	122343359	122343607
4	122621313	122621557
4	122929481	122929679
4	123370979	123371414
4	124009589	124009997
4	125110012	125110323
4	127451384	127451652
4	129395471	129395885
4	129721202	129721438
5	151475	151815
5	3224248	3224594
5	3286866	3287166
5	4219410	4219647
5	4649105	4649404
5	5071218	5071450
5	5853189	5853587
5	6784505	6784848
5	6799950	6800148
5	6929113	6929357
5	7144475	7144695
5	7515234	7515593
5	7622460	7622690
5	8761934	8762259
5	9358018	9358216
5	9695964	9696236
5	9713702	9713911
5	11365342	11365758
5	12242462	12242674
5	12638229	12638623
5	13579931	13580243
5	14806750	14807073
5	15153516	15153897
5	15347437	15347775
5	15646121	15646330
5	15673840	15674056
5	16176972	16177257
5	16372898	16373204
5	18266372	18266622
5	18338661	18338942
5	18409250	18409460
5	18673781	18673993
5	18930412	18930646
5	19484586	19484784
5	19522340	19522622
5	21495572	21495800
5	21517632	21518186
5	21586559	21586886
5	21700650	21700924
5	21748940	21749317
5	22389998	22390387
5	22399994	22400255
5	23041971	23042342
5	26964635	26964852
5	27125958	27126172
5	27251820	27252085
5	27252252	27252512
5	28300788	28301258
5	28880347	28880827
5	30485057	30485288
5	30526914	30527150
5	32989544	32989761
5	33105539	33105808
5	33725283	33725632
5	35691992	35692366
5	35757154	35757429
5	39744544	39744910
5	42299424	42299699
5	43042959	43043214
5	46740866	46741064
5	46823876	46824101
5	47609201	47609399
5	48508406	48508777
5	48555445	48555651
5	57749702	57749950
5	59831143	59831349
5	62546014	62546399
5	63707542	63707879
5	63858608	63858880
5	63951033	63951370
5	64278525	64278723
5	65788720	65788952
5	66067182	66067497
5	66321148	66321375
5	67106463	67106990
5	67363774	67363972
5	68000080	68000409
5	68167746	68168039
5	68755711	68755909
5	73497097	73497378
5	74672736	74672943
5	74880981	74881337
5	76635491	76635689
5	76876549	76877030
5	77127590	77127917
5	79305498	79305764
5	79355925	79356322
5	80492125	80492422
5	80530992	80531208
5	83935528	83935732
5	88104638	88104843
5	88104909	88105107
5	88292802	88293058
5	89673402	89673740
5	90562133	90562363
5	90814937	90815215
5	99358394	99358731
6	413308	413506
6	455420	455861
6	1545873	1546094
6	4479785	4479997
6	4698557	4698891
6	6254423	6254672
6	7189072	7189273
6	12195044	12195258
6	13011667	13011870
6	13321352	13321550
6	14480745	14480995
6	14882241	14882446
6	14942712	14942944
6	14998011	14998322
6	18335385	18335583
6	18499120	18499318
6	18503618	18503827
6	18512070	18512284
6	18644921	18645152
6	18901164	18901419
6	19154282	19154491
6	19206957	19207237
6	19969274	19969580
6	20016908	20017139
6	20372358	20372601
6	27540020	27540242
6	27684246	27684506
6	28195215	28195486
6	28428368	28428566
6	28464694	28464930
6	29366536	29366808
6	31564650	31564934
6	32014065	32014294
6	34121228	34121606
6	34669287	34669485
6	34788130	34788444
6	37193608	37193970
6	37943908	37944267
6	42559755	42560140
6	43164654	43165119
6	43933586	43934003
6	45511143	45511408
6	46229120	46229358
6	47475870	47476152
6	47493709	47494066
6	47638831	47639180
6	47655583	47655923
6	47703404	47703725
6	48002287	48002645
6	48304944	48305182
6	48406154	48406352
6	48728320	48728687
6	48728885	48729083
6	48918121	48918340
6	48971031	48971330
6	48988924	48989247
6	49179214	49179448
6	50569666	50569866
6	51359624	51359901
6	51589544	51589797
6	52099943	52100175
6	52294253	52294545
6	52554018	52554436
6	52703124	52703322
6	52711232	52711457
6	52877012	52877293
6	52937555	52937871
6	53131094	53131479
6	53275143	53275640
6	53784351	53784609
6	54250070	54250471
6	54288092	54288419
6	54476802	54477000
6	54529652	54529850
6	54685088	54685322
6	54685996	54686279
6	54786072	54786593
6	55412489	55412687
6	55939664	55939867
6	55970358	55970625
6	55991352	55991672
6	57258420	57258618
6	57965066	57965298
6	58396600	58396798
6	58857832	58858130
6	59254814	59255084
6	59516575	59517106
6	59773040	59773240
6	60639481	60639688
6	60706888	60707302
6	60759064	60759679
6	60880986	60881194
6	63444647	63444897
6	65150639	65150993
6	67445640	67445918
6	67605408	67605966
6	68487234	68487691
6	69258478	69258676
6	69934638	69934958
6	70241368	70241918
6	70313362	70313561
6	71253516	71253761
6	72256775	72256975
6	74651738	74652121
6	74809310	74809550
6	75015348	75015699
6	75445954	75446234
6	77456145	77456343
6	77707947	77708168
6	79007122	79007355
6	79007677	79007880
6	80034986	80035207
6	81073668	81073932
6	81239378	81239724
6	81630237	81630457
6	82309044	82309476
6	82400812	82401334
6	82854207	82854526
6	83089587	83090150
6	83543485	83543913
6	83650804	83651085
6	83823074	83823272
6	84467431	84467708
6	84879728	84880181
6	84918645	84918859
6	85533334	85533544
6	85642835	85643143
6	86092772	86093001
6	86131581	86131793
6	86137609	86137827
6	87879302	87879847
6	88452586	88452945
6	88530003	88530444
6	88749447	88749856
6	88838707	88838995
6	88921447	88921654
6	88986963	88987326
6	89118793	89118995
6	89317916	89318195
6	89345726	89345924
6	91408194	91408442
6	91747846	91748056
6	92349865	92350163
6	94802840	94803286
6	94891151	94891489
6	95812007	95812205
6	96362811	96363068
6	96733613	96733896
6	97324342	97324713
6	98254214	98254666
6	98598254	98598817
6	100092857	100093273
6	101756668	101756956
6	103965094	103965317
6	106314947	106315272
6	115786666	115786963
6	118878759	118879000
6	119833718	119834061
6	120669917	120670331
6	128030159	128030464
6	129055359	129055623
6	129635500	129635836
6	137575520	137575837
6	144943788	144944276
6	145186595	145186801
6	145674447	145674873
6	145679919	145680223
6	146987225	146987663
6	147428955	147429194
6	148761523	148761742
6	149748207	149748432
6	149985529	149985729
6	153212957	153213277
6	153685488	153685836
6	153756025	153756264
6	153882237	153882456
6	158338221	158338694
6	160298781	160299006
6	160451103	160451400
6	160911589	160911787
6	161173626	161174012
6	164197244	164197586
6	164207866	164208104
6	164777847	164778132
6	164887567	164887807
6	165184859	165185117
6	165710483	165710780
6	165824609	165824861
6	165824933	165825183
6	166645028	166645284
6	167642359	167642627
6	168736205	168736808
6	168870249	168870492
6	169221313	169221551
6	170763608	170763878
7	2446240	2446457
7	4750538	4751101
7	8093479	8094033
7	8518471	8518822
7	12117069	12117554
7	13466301	13466686
7	13845941	13846139
7	13935333	13935591
7	15643741	15643939
7	15793699	15793973
7	19502258	19502528
7	19585856	19586093
7	20998841	20999039
7	21024477	21024799
7	21143253	21143581
7	23165729	23165986
7	23245592	23245902
7	23852712	23852971
7	24046916	24047114
7	25072204	25072425
7	25809115	25809383
7	28765412	28765610
7	28812161	28812436
7	29681157	29681360
7	29694317	29694867
7	30667008	30667223
7	31160924	31161188
7	31222348	31222763
7	31313030	31313262
7	31550495	31550827
7	31791362	31791573
7	32146014	32146358
7	33000370	33000620
7	33085622	33085820
7	34183290	34183625
7	36386151	36387149
7	36410382	36410799
7	38569442	38569798
7	38657789	38658026
7	40896361	40896616
7	46185213	46185541
7	47640911	47641131
7	48049981	48050259
7	48431505	48431893
7	48967201	48967485
7	49817531	49817768
7	50118809	50119011
7	52557472	52557707
7	52793496	52793730
7	52883117	52883317
7	53317440	53317693
7	54655493	54655723
7	55811687	55811936
7	56083522	56083720
7	56540232	56540462
7	57040660	57040998
7	57187282	57187487
7	57503548	57503902
7	58998637	58998934
7	59452126	59452373
7	59768456	59768768
7	60971516	60971917
7	61113543	61113845
7	64123803	64124007
7	64507767	64508120
7	64808506	64808731
7	65685621	65685855
7	68318134	68318477
7	68470486	68470958
7	75180933	75181183
7	75951068	75951326
7	76431797	76432032
7	77698921	77699179
7	77719360	77719583
7	78447066	78447503
7	81669595	81669896
7	86103483	86103915
7	86124386	86124781
7	87889195	87889473
7	88575724	88575977
7	89167921	89168384
7	90346454	90346845
7	90955373	90955659
7	91084678	91085028
7	91413889	91414094
7	96380290	96380488
7	96999459	96999718
7	97197889	97198135
7	97381833	97382229
7	97740337	97740535
7	98822115	98822457
7	99959186	99959481
7	100180697	100181001
7	100392036	100392310
7	103760189	103760411
7	103768183	103768598
7	104009182	104009637
7	104189640	104189947
7	104282989	104283517
7	109961307	109961562
7	110463376	110463732
7	112160699	112160944
7	113148985	113149213
7	114236899	114237153
7	114573739	114574352
7	114590750	114591188
7	117241872	117242117
7	117586543	117586786
7	117676333	117676531
7	120486571	120487083
7	120755008	120755224
7	121238135	121238371
8	140062	140464
8	1038969	1039288
8	1198715	1198913
8	1216808	1217165
8	1387461	1387933
8	1626452	1626666
8	1626801	1627229
8	3828256	3828644
8	4122863	4123166
8	5890618	5890820
8	6452119	6452607
8	10990919	10991170
8	12590183	12590458
8	12969254	12969500
8	20254850	20255072
8	20456273	20456483
8	29190508	29190745
8	30114514	30114716
8	30191955	30192153
8	30759446	30759644
8	30840182	30840614
8	31134106	31134506
8	35219383	35219588
8	38241279	38241612
8	38982409	38982678
8	40846571	40846772
8	43745657	43745911
8	44544212	44544434
8	47702661	47702943
8	56035804	56036002
8	56084295	56084521
8	56194058	56194294
8	56231929	56232127
8	67495456	67495654
8	67647976	67648209
8	69354646	69355182
8	73502345	73502546
8	76270157	76270670
8	76481636	76482050
8	77237851	77238076
8	81024368	81024655
8	83240241	83240521
8	84224785	84225167
8	86036102	86036340
8	86690455	86690728
8	95949362	95949647
8	96692352	96692792
8	96856078	96856280
8	96924790	96925083
8	99782509	99782816
8	102387904	102388237
8	103927271	103927476
8	104560445	104560675
8	104886141	104886628
8	105121302	105121500
8	108914687	108914891
8	110089593	110089841
8	110504722	110505000
8	112762720	112762937
8	116031627	116031947
8	118202592	118202894
8	118250933	118251137
8	119429064	119429381
8	120563506	120563819
8	121409486	121409798
8	121657062	121657295
8	122007323	122007625
8	125259846	125260056
8	127128413	127128687
8	130747880	130748242
8	131472675	131472935
8	135314440	135314638
8	135431895	135432097
8	135802344	135802712
8	135844325	135844524
9	104523	105374
9	223757	224075
9	537683	537931
9	2141227	2141425
9	3075876	3076271
9	4700886	4701270
9	4701601	4701828
9	5502783	5502995
9	6319212	6319589
9	6662627	6662883
9	6679956	6680194
9	6981855	6982095
9	8198979	8199524
9	9280558	9280914
9	10088378	10088717
9	10566560	10566975
9	12065452	12065754
9	12113462	12113852
9	17297266	17297832
9	20288996	20289244
9	20790739	20791074
9	21761281	21761480
9	27812173	27812436
9	28407211	28407461
9	33003046	33003313
9	33041455	33041868
9	35903721	35904091
9	35960110	35960363
9	36620535	36620899
9	37006338	37006622
9	39279291	39279573
9	39368274	39368697
9	39655382	39655769
9	41480864	41481115
9	41947334	41947535
9	45310388	45310636
9	45743326	45743694
9	45863735	45864038
9	46276942	46277354
9	46310139	46310366
9	49986795	49987431
9	51918675	51918965
9	52726509	52726953
9	53008838	53009081
9	55445103	55445603
9	56798487	56798897
9	57017815	57018071
9	60785884	60786125
9	65066661	65066998
9	66316045	66316318
9	67268460	67268728
9	68983677	68983910
9	70462400	70462598
9	71895442	71895752
9	72360167	72360416
9	75215782	75216011
9	75260220	75260532
9	77509149	77509432
9	81837555	81837757
9	83420549	83420769
9	88785603	88785862
9	90336619	90336863
9	90337273	90337601
9	91578898	91579096
9	92681938	92682333
9	99251532	99251766
9	102348521	102349075
9	102564067	102564372
9	103179323	103179551
9	104910666	104910893
9	105984960	105985464
9	106161892	106162400
9	106965570	106965988
9	107292170	107292551
9	107642031	107642277
9	108320067	108320449
9	108631123	108631376
9	109327824	109328022
9	109384851	109385049
9	114202310	114202508
9	114262598	114263107
9	114916595	114917113
9	116109747	116110008
9	116402378	116402620
9	117063999	117064284
9	118114201	118114670
9	120809724	120809932
9	122237837	122238076
9	122580442	122580761
9	122633559	122633790
9	122650651	122650975
9	123762496	123762723
9	124141792	124141990
9	124848012	124848295
9	125982960	125983245
9	126347220	126347492
9	126479591	126479870
9	130785428	130785850
9	131076274	131077019
9	131275436	131275647
9	131426258	131426483
9	131547025	131547223
9	133187541	133187807
9	133214054	133214252
9	135078841	135079135
9	139135695	139135958
10	667487	667706
10	725379	725577
10	12431724	12432006
10	13416738	13416942
10	13711420	13711770
10	13956076	13956274
10	14596971	14597395
10	16190930	16191171
10	16912351	16912829
10	17365340	17365659
10	17471365	17471774
10	17497023	17497221
10	19046075	19046734
10	23222246	23222569
10	24109970	24110206
10	24200158	24200356
10	24459008	24459212
10	24902046	24902284
10	24923471	24923842
10	24974057	24974324
10	24974406	24974695
10	25202260	25202574
10	25427937	25428182
10	25635844	25636207
10	25707372	25707644
10	28995511	28995747
10	29065883	29066170
10	29322465	29322823
10	29439701	29440314
10	30975937	30976173
10	32180545	32180767
10	32755909	32756289
10	34001663	34002088
10	38889412	38889610
10	38970363	38970585
10	39798323	39798533
10	40053110	40053396
10	40741717	40741916
10	43516658	43516869
10	44957977	44958201
10	45078840	45079092
10	46647107	46647308
10	46740431	46740649
10	46819852	46820158
10	46899870	46900124
10	47140672	47140881
10	48921185	48921383
10	48939348	48939703
10	49120222	49120458
10	50310418	50310617
10	51620987	51621682
10	53315222	53315420
10	54676653	54676852
10	55700146	55700461
10	57829304	57829582
10	59816820	59817216
10	59875218	59875459
10	65108325	65108744
10	65160125	65160323
10	65267450	65267783
10	66488115	66488313
10	68528668	68528937
10	68565868	68566166
10	68621367	68621631
11	446772	447134
11	571989	572220
11	1405665	1405980
11	4689767	4690050
11	6000658	6000856
11	7201622	7201825
11	7320654	7321146
11	7545012	7545449
11	8343096	8343294
11	8805879	8806077
11	9912834	9913253
11	14183502	14183700
11	15751614	15751965
11	15876423	15876667
11	16375082	16375439
11	17731333	17731531
11	17848742	17849011
11	18131839	18132083
11	18297803	18298022
11	19616261	19616544
11	21872574	21872820
11	21928783	21928985
11	21929142	21929341
11	22144813	22145105
11	22518664	22518921
11	24971126	24971391
11	25064562	25064760
11	25496524	25496780
11	25643634	25643851
11	25905768	25905966
11	32994679	32994877
11	33257408	33257616
11	49031275	49031488
11	65229764	65230155
11	67018781	67019318
11	67144351	67144562
11	68145246	68145444
11	68920846	68921258
11	74233402	74233730
11	74267176	74267523
11	78600498	78600701
11	79027793	79028059
11	79084067	79084300
12	615719	615929
12	1084272	1084477
12	1121291	1121653
12	1219644	1219884
12	1519401	1519706
12	2285550	2285865
12	2562018	2562382
12	3309007	3309242
12	3355987	3356288
12	3643393	3643651
12	4489107	4489322
12	5208477	5208915
12	5331376	5331729
12	5564919	5565169
12	6116429	6116702
12	6241302	6241515
12	11018510	11018708
12	11680578	11680880
12	11714910	11715471
12	11966496	11967063
12	14035417	14035729
12	14282790	14283028
12	14368149	14368411
12	14571453	14572001
12	14881627	14882230
12	15091615	15091943
12	15164830	15165373
12	15191996	15192380
12	15298972	15299238
12	15350812	15351144
12	16810585	16810879
12	17448053	17448251
12	17984077	17984340
12	18142669	18142931
12	18269056	18269352
12	18426583	18426895
12	19788179	19788430
12	20035426	20035627
12	20041798	20042117
12	20176764	20176962
12	20220750	20221291
12	20406949	20407266
12	20508219	20508499
12	20613649	20613847
12	20796511	20796813
12	20977170	20977368
12	23434759	23434968
12	23766435	23766688
12	24224059	24224416
12	24303583	24303845
12	24351083	24351366
12	25553976	25554174
12	25945644	25945935
12	25971261	25971613
12	27119901	27120381
12	27370111	27370501
12	27526457	27526811
12	31723559	31723916
12	34771004	34771467
12	35393246	35393451
12	35573255	35573484
12	36332891	36333103
12	37536077	37536280
12	37728786	37729183
12	38461659	38461857
12	38824887	38825085
12	39069692	39069972
12	39926803	39927059
12	42933353	42933551
12	43032585	43032869
12	44402854	44403143
12	44616662	44616960
12	44636171	44636456
12	44893397	44893643
12	45174621	45175000
12	45429748	45430025
12	45506511	45506835
12	45596858	45597160
12	46393247	46393493
12	46462191	46462420
12	47685688	47685910
12	47915463	47915940
12	49918773	49918994
12	50348540	50348894
12	50727969	50728217
12	50728567	50728931
12	51508201	51508641
12	51548235	51548433
12	51562684	51562890
12	51970442	51970664
12	52170226	52170424
12	52642912	52643110
12	52853787	52853985
12	52868157	52868492
12	52869453	52869662
12	52903312	52903653
12	52954485	52954806
12	53180876	53181121
12	53376705	53376945
12	53546820	53547090
12	53601629	53601956
12	53781117	53781353
12	56401952	56402230
12	58773311	58773584
12	59158950	59159256
12	59173131	59173399
12	60530160	60530471
12	60617326	60617683
12	60880395	60880593
12	61029324	61029672
12	61186105	61186367
12	61308219	61308485
12	61585290	61585514
13	1127836	1128252
13	1435624	1435926
13	2451945	2452279
13	2840776	2841073
13	3395869	3396146
13	6905040	6905238
13	7153113	7153370
13	10715987	10716277
13	12575420	12575780
13	12685867	12686065
13	14042982	14043188
13	14785292	14785608
13	17533939	17534271
13	18558059	18558279
13	18649596	18650101
13	19510515	19510740
13	21877715	21877926
13	22746430	22746628
13	23020114	23020353
13	24347479	24347906
13	24574779	24574988
13	24695050	24695248
13	25163956	25164201
13	25751354	25751794
13	26286218	26286420
13	27006033	27006345
13	28816794	28817360
13	29847403	29847675
13	30320397	30320660
13	30601957	30602155
13	30804653	30805024
13	31053219	31053417
13	31308566	31308764
13	31991151	31991419
13	32029104	32029404
13	32106811	32107226
13	32253081	32253456
13	32319928	32320213
13	32444798	32445021
13	32822039	32822403
13	33658010	33658346
13	33664036	33664415
13	34075355	34075739
13	34412158	34412393
13	34679486	34679688
13	34682094	34682314
13	34820167	34820582
13	35996695	35997004
13	39088870	39089113
13	39430019	39430397
13	39789576	39789865
13	40167398	40167820
13	47743305	47743626
13	48027249	48027569
13	49090302	49090698
13	50477171	50477428
13	53809674	53809872
13	59710920	59711118
13	61067864	61068209
13	61640517	61640758
13	61703242	61703588
13	64933431	64933705
13	65639252	65639450
13	65721357	65721705
13	65759424	65760098
13	65948407	65948644
13	66020777	66020978
13	66334430	66334811
13	66421325	66421699
13	67417790	67418055
13	68828387	68828957
13	71596292	71596534
13	71646411	71646672
13	71852650	71852955
13	71886697	71886923
13	71892430	71892854
13	72195661	72195940
13	72650307	72650551
13	73901098	73901306
13	74705057	74705273
13	77180683	77180962
13	77181289	77182001
13	77863498	77863766
13	79610578	79611061
13	81750040	81750238
13	81750451	81750649
13	82439574	82439874
13	82548350	82548548
13	82937578	82937818
13	83174423	83174621
13	89333001	89333271
13	90034546	90034755
13	90640562	90640936
13	90818165	90818424
13	90971208	90971845
13	95743267	95743748
13	96390086	96390322
13	96496223	96496579
13	96643246	96643444
13	98592221	98592462
13	100133030	100133310
13	100252942	100253206
13	100442378	100442576
13	106559635	106559833
13	106895058	106895289
13	108435491	108435713
13	108660361	108660559
13	109029361	109029878
13	120727595	120727887
13	121070198	121070491
13	121813444	121813716
13	122187394	122187620
13	123058818	123059024
13	124390731	124391011
13	124604356	124604554
13	127933540	127933745
13	131134436	131134668
13	132431350	132431714
13	133182859	133183146
13	133560673	133560940
13	133689587	133689801
13	134718315	134718587
13	137250437	137250659
13	138151485	138151707
13	140566734	140567216
13	140758594	140758792
13	144855109	144855742
13	146193210	146193510
13	146229852	146230229
13	148087535	148087897
13	151298384	151298663
13	151429264	151429488
13	153480820	153481095
13	157272491	157272854
13	157491014	157491285
13	158326654	158326971
13	158729120	158729353
13	160063814	160064086
13	160397220	160397506
13	162478667	162478868
13	165910910	165911157
13	167895561	167896331
13	179321132	179321501
13	179913841	179914312
13	180570775	180571128
13	182227967	182228179
13	185176605	185176900
13	189289460	189289694
13	192656325	192656530
13	195234346	195234687
13	195396056	195396254
13	196370905	196371497
13	196925473	196925791
13	197093112	197093530
13	197161862	197162151
13	199847722	199848170
13	199997018	199997270
13	200695378	200695776
13	200926175	200926466
13	201009166	201009477
13	202943417	202943722
13	205313872	205314120
13	206257209	206257454
14	904258	904562
14	2603077	2603354
14	6639459	6639680
14	7389832	7390030
14	9517698	9518069
14	10195181	10195396
14	10318417	10318704
14	10467632	10467830
14	13335523	13335771
14	14975815	14976146
14	15034635	15034860
14	16709560	16710126
14	22608761	22609005
14	22654227	22654606
14	22745411	22745649
14	23395891	23396237
14	24317846	24318053
14	26122258	26122674
14	28301190	28301478
14	29068240	29068562
14	29387570	29387777
14	29543380	29543619
14	29658782	29659219
14	30024027	30024251
14	30084975	30085173
14	30264265	30264662
14	30498695	30498893
14	30646256	30646663
14	30792771	30792973
14	30991898	30992096
14	31674585	31674793
14	31946315	31946700
14	34558710	34558949
14	36063165	36063509
14	37582309	37582609
14	37582665	37582990
14	38543345	38543656
14	38698520	38698928
14	39579682	39579963
14	39886397	39886616
14	41357397	41357646
14	42062593	42062971
14	45249989	45250271
14	45924937	45925149
14	45967403	45967603
14	45995470	45995768
14	46016538	46016841
14	46091808	46092080
14	46623491	46623737
14	46874895	46875093
14	47266632	47266869
14	47335417	47335668
14	47544311	47544530
14	47799469	47799951
14	47983970	47984200
14	48204565	48204763
14	48210328	48210816
14	48418124	48418326
14	48543920	48544306
14	49332833	49333109
14	50083344	50083555
14	50190407	50190626
14	50759297	50759495
14	51112336	51112553
14	51468958	51469181
14	51667868	51668066
14	51708131	51708376
14	54652730	54652928
14	55056748	55057140
14	55450232	55450451
14	55749193	55749447
14	55901046	55901244
14	56545100	56545323
14	58119296	58119628
14	59192196	59192400
14	59409081	59409507
14	60309433	60309802
14	61048204	61048480
14	61688549	61688996
14	66277216	66277414
14	71650802	71651142
14	71827539	71827737
14	72210301	72210614
14	73088758	73088971
14	73108050	73108411
14	73167678	73167988
14	73296460	73296726
14	73323496	73323791
14	75117564	75117762
14	75918875	75919173
14	76511099	76511401
14	76592321	76592559
14	76700097	76700313
14	76835966	76836492
14	76864087	76864391
14	77405102	77405452
14	77767129	77767504
14	81763999	81764295
14	81835038	81835236
14	85543867	85544207
14	87588865	87589100
14	88988548	88988894
14	90582345	90582561
14	90725432	90725630
14	92279625	92279853
14	94094680	94094907
14	99885150	99885392
14	99929346	99929574
14	101512475	101512677
14	102891498	102891700
14	103095605	103095867
14	103530700	103530898
14	104106395	104106687
14	104957096	104957379
14	108822663	108823044
14	108886397	108886663
14	108999575	108999822
14	109008097	109008351
14	110806214	110806438
14	110827606	110827898
14	111167218	111167420
14	111351558	111351756
14	112070160	112070358
14	113500548	113500909
14	113707503	113707716
14	113889638	113889931
14	114850835	114851033
14	115064731	115064996
14	121305354	121305760
14	124399991	124400198
14	124520958	124521273
14	128749035	128749311
14	129467142	129467495
14	129510153	129510416
14	129742131	129742419
14	129758263	129758461
14	132523349	132523547
14	132562955	132563393
14	132702910	132703115
14	134253431	134253746
14	135041944	135042173
14	141618055	141618363
15	467744	468218
15	3525972	3526230
15	4259520	4259964
15	7685871	7686170
15	15923529	15923786
15	16206214	16206564
15	16413826	16414040
15	19971732	19971931
15	20104637	20104835
15	29713955	29714246
15	31140493	31140966
15	37800871	37801207
15	44886331	44886649
15	45634924	45635122
15	45763676	45763922
15	45851062	45851519
15	45933096	45933342
15	46445525	46445858
15	47601708	47601975
15	48662490	48662707
15	54382947	54383183
15	54444428	54444641
15	55681390	55681772
15	56438050	56438253
15	59264797	59265161
15	59453576	59453962
15	60439350	60439608
15	60440332	60440535
15	63505298	63505674
15	63593196	63593612
15	64892045	64892290
15	65431092	65431291
15	65431535	65431733
15	67320611	67320883
15	74757658	74757856
15	76108228	76108456
15	77099003	77099335
15	77564457	77564693
15	78098309	78098563
15	78608195	78608509
15	80253795	80253993
15	80461803	80462367
15	81805518	81805832
15	82958079	82958452
15	84156588	84156786
15	87378543	87378829
15	88587639	88587837
15	91493438	91493716
15	91604500	91604838
15	94941187	94941475
15	95248399	95248619
15	95513255	95513603
15	96313897	96314095
15	101211052	101211355
15	101337699	101338201
15	101373484	101373700
15	101373901	101374134
15	101390740	101390938
15	104099219	104099430
15	104656382	104656618
15	105055041	105055293
15	105970234	105970591
15	109451587	109451834
15	110379463	110379689
15	110705421	110705728
15	110873804	110874281
15	110921251	110921499
15	111372069	111372287
15	112723250	112723450
15	112916563	112916843
15	118335547	118336003
15	120296862	120297132
15	120345202	120345400
15	121265567	121265804
15	126287095	126287624
15	130939578	130939794
15	131492400	131492636
15	132174117	132174435
15	132356105	132356362
15	133180413	133180769
15	135003261	135003522
15	137637032	137637230
15	139537235	139537449
15	140024169	140024478
15	140255893	140256167
16	321982	322325
16	4062957	4063283
16	5714354	5714650
16	6145302	6145619
16	18537841	18538314
16	20512080	20512459
16	20523441	20523661
16	21557471	21557675
16	25803655	25803893
16	26707387	26707613
16	27957116	27957613
16	34702233	34702976
16	34858819	34859040
16	35151669	35152051
16	36025252	36025529
16	36217054	36217436
16	37305109	37305372
16	40105106	40105502
16	44146180	44146379
16	44414954	44415197
16	46434566	46434879
16	47284546	47284867
16	47409966	47410193
16	47477801	47478048
16	47917194	47917493
16	50400015	50400213
16	51457717	51458026
16	51907098	51907487
16	52003754	52003976
16	55313034	55313520
16	63409771	63409997
16	66114706	66114953
16	68349933	68350536
16	68359274	68359547
16	68710305	68710559
16	69121503	69121701
16	71275979	71276506
16	71589363	71589561
16	71754882	71755115
16	75260546	75260917
16	79862537	79862771
17	5596874	5597198
17	10691229	10691751
17	11817799	11818050
17	14136372	14136692
17	14151268	14151876
17	14475936	14476430
17	19630023	19630266
17	22357341	22357540
17	22635097	22635295
17	25186618	25186956
17	25998727	25998960
17	26120180	26120378
17	26381098	26381366
17	26480710	26480915
17	26719070	26719396
17	26811109	26811332
17	28070053	28070251
17	28679207	28679657
17	30350983	30351525
17	31056122	31056407
17	31705165	31705458
17	31828487	31828775
17	32825870	32826074
17	33412155	33412371
17	34066923	34067121
17	34581981	34582188
17	35415636	35415834
17	36390582	36390795
17	37224368	37224712
17	37447226	37447472
17	37570222	37570489
17	38342220	38342448
17	38997230	38997428
17	39064480	39064713
17	39092616	39092890
17	39705360	39705621
17	40774686	40774889
17	41094114	41094464
17	41479445	41479659
17	41507551	41507792
17	43710131	43710380
17	43963097	43963334
17	46686007	46686355
17	46933344	46933588
17	47387366	47387564
17	47686002	47686266
17	48074296	48074501
17	48817834	48818032
17	49528024	49528501
17	50869155	50869509
17	50958474	50958850
17	51513541	51513739
17	51697777	51698200
17	54631616	54632052
17	56941616	56941863
17	58594702	58594900
17	59184972	59185341
18	564835	565154
18	1795357	1795555
18	4993106	4993372
18	5928862	5929248
18	6757376	6757574
18	6965917	6966115
18	8957811	8958058
18	9581161	9581685
18	10333195	10333393
18	11151790	11151996
18	11532868	11533154
18	14092137	14092335
18	17670070	17670276
18	17987695	17988052
18	18723065	18723346
18	19142441	19142708
18	19255621	19255837
18	19875723	19875977
18	20653530	20653926
18	23722129	23722412
18	29365115	29365374
18	32797974	32798329
18	33422953	33423356
18	36583956	36584239
18	37708618	37708816
18	37948756	37949155
18	38182896	38183161
18	38284475	38284808
18	40441033	40441293
18	42410618	42410913
18	42652101	42652415
18	43975961	43976358
18	44910051	44910318
18	44985279	44985530
18	45476812	45477010
18	45637113	45637547
18	46205167	46205541
18	47169425	47169964
18	47298000	47298327
18	48522793	48523151
18	50450064	50450420
18	50458252	50458580
18	50533052	50533539
18	50566815	50567052
18	50684401	50684980
18	51038051	51038374
18	51909204	51909484
18	51924146	51924366
18	54283461	54283682
18	54428961	54429213
18	54430805	54431179
X	11409019	11409259
X	12223982	12224180
X	12808288	12808601
X	13229408	13229812
X	20146745	20147058
X	33686054	33686348
X	36989768	36990024
X	37080101	37080360
X	39953386	39953950
X	42175073	42175522
X	43327425	43327634
X	45909598	45909841
X	46758351	46758658
X	60426911	60427120
X	61551270	61551468
X	62187203	62187423
X	83351097	83351295
X	88404517	88404715
X	106708218	106708416
[truncated: 3 more rows]

## Sheet: Gene body DHSs in SAT
Chromosome	Start site	End site
1	14941	15142
1	7447180	7447424
1	8718025	8718311
1	10226808	10227006
1	14160589	14160830
1	14867014	14867418
1	15942827	15943124
1	16139859	16140126
1	16334443	16334641
1	17137928	17138134
1	17341309	17341507
1	19097431	19097629
1	24365344	24365542
1	24633109	24633325
1	25363328	25363610
1	25481578	25481776
1	26080063	26080261
1	26801121	26801417
1	27346228	27346426
1	31185122	31185385
1	43171913	43172166
1	43479645	43479856
1	50178957	50179186
1	50721730	50722014
1	50803858	50804072
1	52435545	52435775
1	53432523	53432801
1	55859868	55860066
1	63956131	63956329
1	65835606	65835808
1	72123211	72123506
1	73190084	73190327
1	74657282	74657514
1	86164008	86164223
1	86964231	86964461
1	96729033	96729261
1	98531833	98532037
1	100573948	100574160
1	100699382	100699796
1	108052839	108053126
1	108409044	108409337
1	108923726	108923926
1	109826078	109826310
1	110365715	110366142
1	113933000	113933198
1	119407635	119407833
1	122726573	122726971
1	127858022	127858220
1	129322066	129322285
1	129499441	129499665
1	139925549	139925815
1	142451490	142451688
1	143127958	143128156
1	143319551	143319749
1	143743236	143743464
1	144958951	144959149
1	158288513	158288929
1	158861700	158861898
1	159317382	159317618
1	159532219	159532440
1	161769187	161769385
1	161984065	161984305
1	163169546	163169872
1	164779693	164779913
1	165058760	165058958
1	167027575	167027781
1	169083474	169083672
1	179478554	179478817
1	179489752	179490302
1	179713672	179713870
1	184256640	184256934
1	186530624	186530873
1	187728015	187728213
1	190170177	190170500
1	194540873	194541072
1	197309773	197309974
1	204357180	204357378
1	216692092	216692356
1	219792143	219792341
1	222990117	222990315
1	229281885	229282083
1	229336798	229337085
1	230544759	230544964
1	230872415	230872648
1	231081556	231081796
1	232930563	232930761
1	235790415	235790634
1	236309748	236309979
1	237172131	237172329
1	238259355	238259627
1	238567840	238568038
1	238804383	238804587
1	239919053	239919251
1	242215247	242215560
1	243414811	243415032
1	251030175	251030384
1	253656446	253656664
1	257359187	257359427
1	257475826	257476025
1	267711334	267711536
1	268507336	268507586
1	268669577	268669855
1	269879581	269879779
1	270190665	270190909
1	271377519	271377786
1	271453505	271453835
1	272359389	272359622
1	272597924	272598122
2	132304	132556
2	2433600	2433807
2	5025556	5026006
2	5256395	5256626
2	5784256	5784457
2	6758688	6758922
2	6903268	6903498
2	7075206	7075473
2	7924814	7925293
2	9066382	9066596
2	9535023	9535516
2	11876146	11876489
2	12380988	12381208
2	12531275	12531473
2	13127012	13127210
2	13176592	13176790
2	15066677	15066890
2	15400709	15400907
2	15935597	15935807
2	18239116	18239347
2	25423390	25423601
2	25550422	25550652
2	27326929	27327325
2	27329950	27330213
2	27419629	27420228
2	27466479	27466907
2	28634835	28635033
2	33805915	33806224
2	39738171	39738369
2	39828987	39829256
2	41349032	41349230
2	42257105	42257342
2	44612920	44613201
2	45290095	45290358
2	46904613	46904820
2	49243189	49243392
2	49857375	49857580
2	50886570	50886768
2	52210538	52211163
2	53518130	53518357
2	58506275	58506473
2	59409252	59409519
2	59612895	59613093
2	59883496	59883720
2	60175869	60176105
2	60233952	60234150
2	60577257	60577455
2	61128132	61128598
2	61272659	61272911
2	62184743	62185191
2	62251083	62251345
2	64350616	64350847
2	65062707	65063099
2	66262433	66262693
2	66475426	66475626
2	66950236	66950753
2	68677843	68678051
2	69029669	69029885
2	69365070	69365268
2	71871787	71872009
2	72216165	72216363
2	72909424	72909741
2	73130598	73130796
2	73984591	73984789
2	74150940	74151138
2	75289800	75290037
2	75727997	75728237
2	75851330	75851577
2	77658404	77658716
2	78496792	78496990
2	79324059	79324263
2	80367922	80368152
2	80990947	80991145
2	81613269	81613581
2	82101438	82101707
2	85890855	85891053
2	88903018	88903274
2	89255672	89256101
2	89840045	89840243
2	90351176	90351384
2	97647331	97647831
2	98441410	98441737
2	105203569	105203767
2	106555471	106555679
2	113325285	113325533
2	120441460	120441723
2	123003236	123003513
2	129807807	129808005
2	132146709	132146907
2	133474744	133474942
2	133576963	133577165
2	134092762	134093097
2	135305888	135306125
2	135539067	135539479
2	135596419	135596617
2	136733700	136733948
2	138288329	138288545
2	139782581	139782800
2	141336857	141337110
2	141884956	141885242
2	141965245	141965504
2	142313319	142313517
2	143207861	143208093
2	144929668	144929887
2	145037511	145037709
2	151727302	151727501
3	118152	118415
3	763462	763708
3	5939471	5939669
3	6924578	6924826
3	6924895	6925111
3	7063817	7064033
3	7591000	7591288
3	9127330	9127528
3	10843219	10843417
3	11219508	11219730
3	11706779	11706977
3	16518880	16519319
3	16563798	16564029
3	17107775	17108195
3	17801288	17801499
3	17896221	17896520
3	17904881	17905331
3	26760387	26760608
3	32138677	32138919
3	32821339	32821544
3	36026548	36026759
3	36863516	36863925
3	37139862	37140091
3	38718596	38718794
3	39348630	39348833
3	42863419	42863637
3	43455731	43456208
3	43552423	43553450
3	44433463	44433733
3	45201072	45201323
3	45513299	45513497
3	45888024	45888357
3	46993266	46993465
3	51555391	51555589
3	53291051	53291249
3	53692570	53692860
3	54347289	54347522
3	55375126	55375324
3	56858121	56858512
3	58096127	58096429
3	58490892	58491102
3	59456310	59456521
3	63845132	63845354
3	68540683	68541007
3	71423863	71424095
3	72324831	72325145
3	72945877	72946075
3	73098417	73098615
3	77856199	77856437
3	81285711	81286039
3	87108532	87108792
3	94253443	94253680
3	109068088	109068375
3	110474438	110474637
3	111919604	111919803
3	112550302	112550546
3	114722615	114722958
3	117775875	117776106
3	126086840	126087038
3	127244165	127244363
3	131237269	131237568
3	132279994	132280244
4	6920419	6920914
4	7059202	7059400
4	7765173	7765528
4	10160542	10160784
4	19513909	19514107
4	33946521	33946730
4	34084624	34085068
4	34265107	34265348
4	35838782	35838980
4	36208752	36209059
4	36653994	36654192
4	38914437	38914662
4	41804185	41804899
4	50508727	50508937
4	53952982	53954302
4	55974778	55974993
4	56173935	56174133
4	56607883	56608163
4	57282888	57283096
4	62912565	62912787
4	63271098	63271361
4	64955884	64956083
4	65020835	65021045
4	68120253	68120462
4	70176538	70176951
4	70380292	70380592
4	72256818	72257016
4	75191818	75192016
4	79447863	79448063
4	79686285	79686531
4	80093375	80093573
4	82794142	82794340
4	84174392	84174805
4	88161572	88161773
4	89108054	89108517
4	92028443	92028854
4	93926380	93926605
4	94557999	94558197
4	95766688	95767082
4	98733816	98734183
4	99997460	99998109
4	100426218	100426416
4	103844665	103844910
4	104315336	104315624
4	105992401	105992762
4	106568613	106568863
4	106758870	106759226
4	108011558	108011756
4	108635824	108636085
4	109271723	109271964
4	111293525	111293763
4	111293850	111294205
4	112702662	112702860
4	112703359	112703582
4	117619256	117619475
4	117791914	117792299
4	119255633	119255864
4	130092317	130092515
4	130702529	130702770
5	633643	633841
5	3122202	3122400
5	4095589	4095787
5	6174827	6175302
5	6269346	6269551
5	7514830	7515094
5	7776798	7777104
5	8879880	8880078
5	9322325	9322560
5	9648597	9648866
5	13397217	13397804
5	13664888	13665108
5	16016257	16016480
5	17399978	17400205
5	17490781	17490984
5	18588077	18588507
5	18878541	18878809
5	19483923	19484247
5	21624876	21625074
5	21626196	21626443
5	23233784	23234061
5	27415658	27415856
5	29596634	29596832
5	33160073	33160271
5	34777263	34777502
5	36273508	36273839
5	41859342	41859543
5	43941813	43942011
5	44529826	44530094
5	44558393	44558593
5	45751835	45752078
5	46022869	46023116
5	46222519	46222912
5	46370917	46371115
5	46574575	46574807
5	46627075	46627273
5	48890708	48890906
5	49832844	49833042
5	50553432	50553644
5	53691116	53691599
5	59393508	59393837
5	61162989	61163262
5	63005684	63005944
5	63829739	63830022
5	63859552	63859758
5	64059129	64059414
5	64106043	64106241
5	64803187	64803394
5	65856492	65856783
5	67305038	67305541
5	82257766	82258026
5	85036650	85036848
5	86405415	86405673
5	87279956	87280216
5	90228126	90228695
5	90234865	90235091
5	90244799	90245045
5	90245731	90245929
5	90246451	90246735
5	100428861	100429099
6	1703236	1703472
6	2595994	2596215
6	2638125	2638407
6	4269617	4269835
6	4513482	4513828
6	8528824	8529029
6	10328403	10328744
6	13187523	13187721
6	14715544	14715766
6	15911283	15911537
6	17434371	17434636
6	17605640	17605892
6	17854643	17854841
6	18500123	18500326
6	18506231	18506439
6	19373357	19373555
6	23842387	23842585
6	27293462	27293660
6	28820463	28820719
6	29115402	29115626
6	29118262	29118611
6	29467593	29467795
6	32071900	32072122
6	34758609	34758815
6	37592155	37592356
6	37943608	37943830
6	39373504	39373702
6	42574654	42574852
6	42945355	42945635
6	42969605	42969803
6	44670297	44670516
6	46403658	46403880
6	47289850	47290227
6	47740882	47741214
6	48313730	48314135
6	48943240	48943454
6	49148667	49148901
6	49358093	49358348
6	49571084	49571322
6	49711827	49712088
6	50441877	50442127
6	51029721	51029966
6	51378113	51378311
6	51963945	51964197
6	53045064	53045276
6	53065203	53065802
6	54564388	54564717
6	54590424	54590723
6	54882058	54882515
6	55804843	55805112
6	56189514	56189712
6	56510190	56510390
6	56610729	56611049
6	57701609	57701807
6	58549875	58550243
6	58552432	58552894
6	58553411	58553727
6	58805641	58805839
6	61396068	61396266
6	62968328	62968526
6	63705846	63706183
6	67434412	67434640
6	71896312	71896510
6	72579392	72579590
6	73146213	73146512
6	75325623	75325836
6	75651228	75651426
6	78011397	78011595
6	78241629	78241979
6	79809839	79810079
6	81722328	81722591
6	82872872	82873070
6	84069290	84069711
6	84238507	84238823
6	84417881	84418146
6	85084844	85085182
6	85321766	85321974
6	85327080	85327278
6	86092227	86092449
6	91074957	91075167
6	92081342	92081828
6	92327732	92328102
6	92413933	92414131
6	95251826	95252068
6	97359569	97359779
6	99435515	99435713
6	100363500	100363831
6	100789343	100789547
6	106788222	106788446
6	108450459	108450697
6	108763469	108763693
6	109109984	109110281
6	110122214	110122412
6	115786145	115786359
6	117691298	117691591
6	127960546	127960761
6	136816982	136817182
6	137596565	137596784
6	141440843	141441042
6	141960069	141960268
6	142516767	142517029
6	146266378	146266626
6	147954214	147954500
6	157495564	157495780
6	159854776	159854979
6	163212063	163212473
6	164524059	164524274
6	164526754	164527130
6	164684546	164684995
6	165267889	165268198
6	165847687	165847930
7	978728	979022
7	1656759	1656996
7	2379101	2379410
7	2963219	2963446
7	3004794	3004992
7	10867777	10868403
7	21835384	21835600
7	22824177	22824381
7	23191830	23192028
7	24232001	24232215
7	24583124	24583376
7	24592063	24592298
7	24604444	24604642
7	24604995	24605196
7	24605288	24605538
7	24605655	24605890
7	24606102	24606302
7	25247675	25247916
7	27206586	27206847
7	27209500	27209851
7	32787968	32788593
7	32876341	32876539
7	33236774	33236972
7	35735188	35735456
7	36920484	36920818
7	38213165	38213381
7	38216268	38216598
7	38388846	38389044
7	40205971	40206271
7	41469186	41469459
7	42033233	42033439
7	45815330	45815576
7	46244902	46245100
7	46945980	46946178
7	47978352	47978576
7	48010753	48010983
7	50163663	50163861
7	51186128	51186348
7	51929430	51929677
7	53020340	53020898
7	58176651	58177024
7	58959904	58960210
7	58993889	58994089
7	59226186	59226393
7	59440445	59440643
7	60693051	60693273
7	60878329	60878603
7	61108448	61108646
7	63123887	63124138
7	64916722	64916925
7	75089534	75089749
7	75756165	75756958
7	75777647	75777902
7	75789049	75789342
7	76036271	76036592
7	76547242	76547465
7	81103737	81103950
7	83085613	83085919
7	86123960	86124158
7	93393903	93394215
7	93552536	93552734
7	96798074	96798392
7	98588822	98589020
7	100123375	100123610
7	100510617	100510815
7	101286734	101286932
7	104189214	104189412
7	112753176	112753699
7	113148326	113148693
7	116541526	116541786
7	116786908	116787470
7	121068971	121069169
7	121376176	121376374
8	15877	16114
8	1240774	1240972
8	3390010	3390259
8	3797341	3797567
8	4095665	4095870
8	7393727	7393930
8	8926462	8926660
8	12487648	12487850
8	19507632	19507836
8	19708062	19708260
8	20492154	20492356
8	28920573	28920776
8	29489584	29489782
8	32354267	32354485
8	32575984	32576182
8	38745178	38745520
8	40145217	40145571
8	41458543	41458741
8	41846377	41846599
8	52465308	52465506
8	65394591	65394789
8	70055020	70055226
8	71983467	71983720
8	75608660	75608881
8	75755330	75755528
8	77557387	77557848
8	79277493	79277743
8	82370130	82370328
8	87569872	87570274
8	87773670	87773980
8	97013224	97013422
8	99151065	99151315
8	102259945	102260273
8	104547616	104547844
8	108790907	108791146
8	112586981	112587261
8	114252133	114252402
8	116250050	116250365
8	123504257	123504465
8	130664917	130665115
8	132770755	132770955
8	133862346	133862560
8	135215762	135216003
8	136659167	136659391
8	137491331	137491593
9	2341505	2341820
9	2609335	2609570
9	3075600	3075798
9	3441181	3441379
9	3441584	3441782
9	4110347	4110545
9	4699990	4700596
9	4701938	4702199
9	6950292	6950527
9	6960502	6960703
9	8667414	8667666
9	8840138	8840339
9	9737389	9737587
9	9968425	9968789
9	9980268	9980666
9	10004517	10004715
9	10956051	10956249
9	11720480	11720678
9	12277792	12277990
9	19608192	19608446
9	20124134	20124424
9	20721387	20721921
9	20773442	20773640
9	21919089	21919298
9	27279031	27279358
9	32126808	32127061
9	32438728	32438950
9	34620939	34621271
9	39666328	39666593
9	45954775	45955039
9	52117449	52117736
9	52841878	52842133
9	53882254	53882471
9	54035479	54035724
9	55538454	55538653
9	55697782	55697980
9	55947489	55947768
9	56749055	56749253
9	60629710	60629908
9	64033565	64033804
9	66249694	66249969
9	66285524	66286046
9	71350241	71350466
9	72184897	72185095
9	72193621	72193822
9	72444162	72444424
9	74277465	74277689
9	76360285	76360519
9	78218555	78218810
9	87021774	87022145
9	93462661	93463181
9	100271721	100271973
9	101414503	101414702
9	101693096	101693294
9	102782359	102782616
9	105388781	105389036
9	107456678	107456876
9	107745374	107745572
9	108247388	108247654
9	109260456	109260869
9	112931884	112932163
9	116292090	116292361
9	120859917	120860190
9	124847409	124847607
9	126172365	126172563
9	126707495	126707699
9	127539826	127540336
9	129116554	129116778
9	130835328	130835580
9	130908546	130908800
10	2315289	2315711
10	13976045	13976283
10	14006635	14006849
10	15206341	15206624
10	15296104	15296362
10	17258839	17259125
10	17495516	17495869
10	17559384	17559826
10	18302920	18303163
10	19171016	19171254
10	19428290	19428585
10	19456868	19457144
10	19474050	19474335
10	19483287	19483499
10	19869672	19869892
10	21618153	21618367
10	22796436	22796787
10	23039012	23039266
10	24445233	24445431
10	24930388	24930636
10	24952827	24953864
10	24954747	24955228
10	24955491	24955761
10	24960813	24961018
10	24961145	24962073
10	24966494	24966721
10	24974748	24975338
10	24975494	24976064
10	28449292	28449490
10	29263732	29264045
10	29473176	29473407
10	30975286	30975488
10	32388487	32388685
10	41576696	41576938
10	42744268	42744466
10	50310047	50310327
10	52601273	52601529
10	56156565	56156822
10	57829647	57830027
10	57882203	57882499
10	59326740	59326938
10	62279922	62280158
10	64838345	64838588
10	65109100	65109388
11	352240	352447
11	602421	602639
11	1055870	1056068
11	2421717	2421960
11	2449092	2449459
11	2553907	2554105
11	3448909	3449128
11	5333270	5333468
11	6604601	6604815
11	7248780	7248978
11	8884567	8884837
11	11475665	11475863
11	19377632	19377948
11	22687800	22688055
11	22877035	22877233
11	24963564	24963768
11	45075462	45075727
11	46285536	46285766
11	47935198	47935396
11	49030157	49030451
11	49808266	49808464
11	51863187	51863481
11	60732899	60733175
11	64234087	64234285
11	64294303	64294501
11	66033363	66033590
11	67145199	67145397
11	67597549	67597858
11	67947479	67947677
11	68052291	68052579
11	68100716	68100914
11	68649940	68650140
11	70194015	70194346
11	75545039	75545276
11	76874739	76875136
11	77270543	77270836
11	77273012	77273248
12	394049	394247
12	1410728	1411031
12	2355387	2355688
12	4665284	4665519
12	5536376	5536574
12	5627911	5628129
12	6534720	6534918
12	7819641	7820078
12	8562844	8563042
12	11031965	11032163
12	12531748	12531966
12	13080206	13080404
12	13793327	13793525
12	14261414	14261936
12	14608435	14608673
12	17946949	17947152
12	18077733	18078225
12	18237737	18237998
12	18344117	18344315
12	19701260	19701458
12	20976386	20976645
12	21271701	21271899
12	21436005	21436327
12	22071427	22071706
12	22221338	22221816
12	22264965	22265186
12	23915480	23915770
12	26769105	26769391
12	27004777	27005007
12	33817506	33817773
12	35199081	35199316
12	38074443	38074651
12	38141766	38141964
12	38282278	38282476
12	39669925	39670163
12	40281670	40281971
12	42167293	42167520
12	42529496	42529708
12	43305200	43305398
12	47644738	47644936
12	47785028	47785355
12	47804268	47804559
12	47859800	47860031
12	48904498	48904696
12	51718865	51719107
12	51767687	51767885
12	52104600	52104859
12	52418977	52419198
12	52428120	52428318
12	52659435	52660062
12	52749860	52750197
12	52843191	52843518
12	53106537	53106747
12	53372637	53372886
12	53590857	53591060
12	54414139	54414337
12	54543632	54543878
12	58564750	58564991
13	3993166	3993417
13	10757544	10757805
13	12485877	12486075
13	16147000	16147246
13	18775889	18776087
13	18995255	18995509
13	19084851	19085118
13	19275921	19276119
13	21609202	21609400
13	23020519	23021006
13	24030672	24030925
13	26108173	26108661
13	26693818	26694016
13	26964231	26964502
13	29995539	29995997
13	30939318	30939563
13	32712520	32712770
13	33699920	33700134
13	35377146	35377430
13	35640696	35640894
13	40210304	40210715
13	40356915	40357134
13	41541033	41541245
13	45527032	45527372
13	51372635	51373098
13	54266098	54266391
13	61303358	61303556
13	64066494	64066748
13	68477870	68478193
13	68546556	68546775
13	71561238	71561460
13	71917619	71917885
13	72631303	72631501
13	73763225	73763428
13	75390240	75390589
13	77750522	77751036
13	77995918	77996116
13	78901419	78901617
13	80885049	80885256
13	82265986	82266211
13	82548710	82548977
13	84634594	84634923
13	91347113	91347393
13	93306718	93306939
13	96651863	96652341
13	97893966	97894223
13	100252527	100252725
13	100924911	100925135
13	109662276	109662481
13	110587593	110587791
13	110729296	110729543
13	114023493	114023895
13	119669120	119669391
13	121237067	121237267
13	123930025	123930321
13	125044555	125044872
13	125102410	125102608
13	131385342	131385587
13	131476320	131476585
13	132607102	132607303
13	133383346	133383609
13	136762744	136762987
13	137547968	137548218
13	137775292	137775538
13	138018903	138019114
13	139730217	139730415
13	145364784	145365030
13	151593569	151593778
13	154031069	154031316
13	159134428	159134679
13	167803197	167803395
13	173634762	173635278
13	181100898	181101096
13	184358965	184359163
13	198192713	198192911
13	203364014	203364216
13	203658837	203659035
13	203779330	203779659
13	205746209	205746407
13	207735247	207735507
14	734568	734766
14	1018094	1018292
14	3477379	3477577
14	5935107	5935491
14	5935554	5935853
14	6086293	6086507
14	6360470	6360701
14	7342863	7343078
14	7345629	7345884
14	8962016	8962216
14	10062117	10062348
14	12197234	12197493
14	12197597	12197809
14	12205062	12205326
14	12490639	12490966
14	14982918	14983116
14	15718824	15719036
14	17817780	17818016
14	21800736	21800950
14	21808407	21808749
14	24341459	24341866
14	28127379	28127577
14	28725447	28725671
14	30164086	30164284
14	31028005	31028472
14	31789466	31789664
14	31869274	31869616
14	31946022	31946242
14	35662762	35662960
14	35924275	35924473
14	38858326	38858524
14	39326830	39327028
14	39606868	39607108
14	39908518	39908716
14	40117526	40117727
14	41343254	41343452
14	41757172	41757500
14	42126832	42127036
14	43169311	43169532
14	45249467	45249665
14	48275978	48276206
14	48876749	48876947
14	48877018	48877229
14	49793131	49793405
14	50325198	50325579
14	51289245	51289458
14	51666224	51666625
14	51705710	51705961
14	54193824	54194145
14	54638629	54638936
14	54742531	54742756
14	56087806	56088004
14	59192478	59192680
14	60720255	60720474
14	61667452	61667710
14	62748340	62748555
14	63615964	63616162
14	65551971	65552213
14	66919746	66919963
14	72421543	72421741
14	72555418	72555688
14	74815414	74815868
14	77785934	77786160
14	78491651	78491872
14	79425792	79425990
14	80591287	80591485
14	81895865	81896185
14	87207408	87207620
14	87931397	87931634
14	89308390	89308588
14	89620888	89621288
14	89778657	89778855
14	91104752	91104972
14	99106004	99106202
14	100804006	100804204
14	101165693	101166051
14	103278030	103278228
14	103831664	103831898
14	103871510	103871731
14	104563941	104564162
14	106236077	106236396
14	106416276	106416676
14	106948993	106949234
14	108304229	108304671
14	108886760	108887125
14	109125142	109125340
14	109796863	109797152
14	112734999	112735217
14	113454605	113454803
14	114756335	114756590
14	116964790	116964988
14	118629261	118629499
14	121664536	121664747
14	124834781	124835013
14	124938270	124938589
14	126882513	126882711
14	128963014	128963212
14	129113897	129114156
14	132532282	132532595
14	133738237	133738435
14	134480882	134481128
14	135083869	135084067
14	135364078	135364276
14	138931024	138931222
14	138935625	138935889
15	11112358	11112562
15	12980804	12981046
15	16139737	16139940
15	18500680	18500878
15	18823009	18823232
15	27541483	27541682
15	31946328	31946668
15	33084641	33084865
15	33299080	33299417
15	34285634	34285875
15	37625302	37625500
15	43788284	43788560
15	45763303	45763501
15	46503134	46503452
15	47046362	47046602
15	47093973	47094179
15	47401655	47402109
15	48656271	48656490
15	56003160	56003404
15	57388940	57389138
15	59312970	59313404
15	66317499	66317697
15	66649084	66649354
15	76007271	76007497
15	76135706	76136005
15	81093929	81094127
15	83377071	83377293
15	83519901	83520186
15	83520347	83520545
15	83538188	83538386
15	85605370	85605571
15	87378925	87379251
15	94703745	94703963
15	95140150	95140604
15	95248856	95249216
15	95512965	95513184
15	99654531	99654928
15	100065511	100065802
15	106515998	106516310
15	108977538	108978202
15	110363389	110363587
15	110874352	110874716
15	119997675	119997907
15	120224562	120224760
15	120472589	120472787
15	120589765	120589982
15	120756277	120756540
15	123502837	123503041
15	124626768	124627056
15	124741832	124742168
15	132968780	132969173
15	134621451	134621649
15	135944745	135944943
15	139148508	139148728
15	140264943	140265159
16	3360346	3360579
16	3563667	3563885
16	5879082	5879280
16	19556030	19556329
16	21542239	21542442
16	23679162	23679979
16	23680035	23680760
16	23681073	23681429
16	23682519	23683052
16	23767936	23768384
16	24060896	24061161
16	26077898	26078097
16	27814283	27814560
16	30170172	30170370
16	36749337	36749549
16	37934924	37935180
16	39770705	39770903
16	39890395	39890684
16	40177954	40178167
16	43571656	43571854
16	47557757	47558078
16	51209801	51210023
16	51210554	51211039
16	53692372	53692573
16	64720986	64721230
16	65776235	65776436
16	71299123	71299434
16	72830638	72830909
16	73268769	73269043
16	75374842	75375115
17	1215347	1215572
17	2073060	2073261
17	5749598	5750009
17	10624696	10625033
17	14176851	14177075
17	15750524	15750722
17	18543145	18543343
17	26760324	26760522
17	26850049	26850385
17	27807924	27808153
17	28357495	28357693
17	31942784	31943151
17	32826425	32826768
17	33869604	33869867
17	36298291	36298489
17	37524700	37524937
17	38637452	38637752
17	39245243	39245659
17	39424486	39424687
17	39637961	39638159
17	42306225	42306508
17	43962724	43962939
17	45236135	45236333
17	46143951	46144282
17	47032992	47033245
17	47723209	47723445
17	49731178	49731412
17	54923587	54923924
17	59174397	59174782
17	59360152	59360350
17	61553671	61553963
17	62595752	62595976
18	2202040	2202238
18	2897292	2897559
18	5252398	5252596
18	6443615	6443862
18	7179852	7180050
18	7416429	7416637
18	8007135	8007358
18	9150104	9150737
18	9333847	9334085
18	10268664	10268862
18	10332404	10332686
18	16621894	16622125
18	16737302	16737563
18	18147613	18147842
18	18819670	18819924
18	23389381	23389697
18	25975980	25976330
18	27459119	27459360
18	32004035	32004239
18	33220049	33220247
18	34554344	34554579
18	40172151	40172423
18	40397550	40397898
18	41145785	41146020
18	42351894	42352214
18	43727880	43728232
18	48755836	48756083
18	49137985	49138183
18	51361765	51362282
18	52466018	52466253
18	54565077	54565275
18	55435448	55435653
18	55952344	55952542
X	125336	125612
X	12224414	12224683
X	12397735	12398114
X	13426322	13426543
X	14169715	14170055
X	15773013	15773211
X	20221892	20222342
X	25358620	25358818
X	27586283	27586481
X	28875287	28875555
X	28875624	28876061
X	30614862	30615144
X	37028978	37029176
X	45072576	45072781
X	51231138	51231374
X	54961730	54961960
X	56548800	56549113
X	74861512	74861784
X	82980555	82980753
X	83189788	83190007
X	83339139	83339337
X	84937348	84937641
X	86550317	86550515
X	86641291	86641489
X	92586184	92586660
X	101807139	101807337
X	101807832	101808167
X	118534377	118534605
X	122397470	122397673
X	123057905	123058200
X	125485209	125485501
X	125566091	125566333
X	125881703	125882017

## Sheet: Intergenic DHSs in SAT
Chromosome	Start site	End site
1	3689832	3690084
1	10411011	10411209
1	17915072	17915270
1	31244176	31244411
1	46849809	46850007
1	63787656	63787855
1	66017084	66017305
1	68748227	68748434
1	70188352	70188558
1	85550079	85550292
1	87936257	87936455
1	92603672	92603884
1	92838620	92838818
1	92840467	92840730
1	92852601	92852835
1	101447955	101448153
1	103236796	103237016
1	107038548	107038820
1	118212682	118212948
1	118401213	118401411
1	118756904	118757102
1	124585938	124586137
1	140914362	140914560
1	142997044	142997315
1	146836299	146836676
1	146863341	146863586
1	146957341	146957539
1	150067263	150067461
1	157598159	157598403
1	164859746	164859944
1	164930867	164931141
1	167915564	167915829
1	169874919	169875117
1	171385688	171386055
1	176204354	176204552
1	176357867	176358065
1	181044877	181045176
1	192441461	192441979
1	198758374	198758600
1	199179481	199179680
1	219075168	219075366
1	231212638	231212871
1	231988745	231988943
1	233062022	233062224
1	236720877	236721118
1	247721206	247721457
1	251634717	251634986
1	256131319	256131608
1	259076661	259076881
2	3664186	3664575
2	3983407	3983605
2	11930636	11930839
2	21212271	21212480
2	23817704	23817958
2	31125199	31125432
2	31999143	31999397
2	42317097	42317316
2	45702268	45702466
2	47708661	47708887
2	49945885	49946103
2	50614848	50615046
2	50623987	50624198
2	50672375	50672677
2	52134589	52134787
2	57324393	57324591
2	58165751	58166310
2	59536770	59536976
2	60699517	60699798
2	66370675	66371000
2	70671662	70671904
2	83606987	83607190
2	98371157	98371415
2	98703862	98704060
2	102735916	102736120
2	104236532	104236730
2	107262533	107262749
2	120483138	120483360
2	120982613	120982991
2	125964678	125964942
2	126013080	126013290
2	145628931	145629416
2	146180240	146180468
3	5630864	5631130
3	8805819	8806026
3	25656229	25656461
3	34775055	34775253
3	57737955	57738153
3	59539700	59539919
3	65263510	65263708
3	70696382	70696594
3	80331082	80331456
3	81059515	81059725
3	92500380	92500615
3	95666815	95667013
3	97807146	97807545
3	104894572	104894778
3	105551565	105551773
3	113491749	113492032
3	118064893	118065145
3	120417292	120417574
3	122301064	122301269
3	129573484	129573725
3	129699212	129699410
4	5428324	5428522
4	27542614	27542847
4	32609618	32609978
4	37843049	37843247
4	46447199	46448139
4	46452889	46453517
4	46498380	46498643
4	46499199	46499512
4	46518492	46518690
4	51701260	51701478
4	55623176	55623398
4	56393644	56393842
4	71022912	71023135
4	76026225	76026446
4	89040242	89040440
4	95894574	95894832
4	96114950	96115190
4	96287424	96287622
4	99225831	99226091
4	125643479	125643677
5	1038824	1039022
5	2965818	2966016
5	3468693	3469123
5	3833162	3833360
5	36789504	36789841
5	37331738	37331984
5	37782890	37783088
5	37978785	37979078
5	39181184	39181382
5	39811277	39811507
5	39811861	39812186
5	39812238	39812440
5	39886564	39886822
5	39887218	39887469
5	39888199	39888405
5	39894997	39895227
5	39901912	39902112
5	39904939	39905253
5	39907674	39907894
5	39908528	39908972
5	39909728	39909940
5	39911496	39911695
5	39913135	39913466
5	39929637	39929946
5	39998717	39998940
5	40080988	40081195
5	40083828	40084113
5	40175229	40175431
5	40195762	40196537
5	40197093	40197806
5	40198052	40198263
5	40746934	40747132
5	47698167	47698421
5	64378622	64378821
5	72041259	72041514
5	78328319	78328517
5	78415211	78415409
5	81206019	81206219
6	30841	31093
6	33993	34241
6	38841	39039
6	4755119	4755317
6	25582790	25582995
6	26299979	26300201
6	26377346	26377546
6	29078873	29079086
6	38744580	38744964
6	38758819	38759130
6	38781190	38781426
6	38837348	38837587
6	41062284	41062774
6	43815475	43815702
6	56745994	56746222
6	65680656	65680952
6	69837755	69837983
6	75303167	75303430
6	81418879	81419256
6	83983128	83983488
6	97481781	97481979
6	98114766	98114964
6	98950874	98951243
6	105480526	105480724
6	110987557	110987791
6	113910251	113910497
6	114247561	114247809
6	123780164	123780362
6	125696209	125696407
6	126703008	126703289
6	126703394	126703721
6	127714475	127714704
6	128335553	128335792
6	130107787	130107985
6	139584024	139584222
6	147394999	147395208
6	150014069	150014280
6	165620774	165621005
7	2176535	2176734
7	5286030	5286487
7	10452835	10453168
7	15254581	15254798
7	29379478	29379676
7	36296713	36296970
7	47089280	47089518
7	47089602	47089849
7	47091903	47092137
7	48273485	48273703
7	49942707	49943193
7	51698997	51699195
7	57150510	57150805
7	63840738	63840936
7	64576940	64577219
7	65600147	65600345
7	68143319	68143596
7	78729372	78729570
7	81889887	81890095
7	86354013	86354275
7	89930128	89930347
7	111536331	111536702
7	117363391	117363590
7	117862478	117862676
7	118848112	118848310
8	4031187	4031420
8	7600881	7601079
8	12082568	12082766
8	17580108	17580307
8	17691561	17691791
8	25180744	25180942
8	26257559	26257759
8	29921068	29921266
8	39360145	39360345
8	39408635	39408859
8	44252505	44252714
8	45431344	45431548
8	46817568	46817823
8	48538754	48539044
8	51750273	51750471
8	53672149	53672373
8	54507781	54507984
8	54589430	54589706
8	54673786	54673986
8	54674307	54674547
8	56386070	56386302
8	58816257	58816566
8	60006762	60006977
8	62862368	62862575
8	67132701	67132899
8	73137445	73137752
8	73137913	73138201
8	80092014	80092339
8	80229465	80229667
8	90171983	90172244
8	90172339	90172573
8	95511643	95511841
8	97270890	97271088
8	97458138	97458336
8	107517679	107517923
8	138877863	138878061
9	26265	26467
9	10893027	10893225
9	21241092	21241308
9	32946777	32946985
9	43390773	43390981
9	52302623	52303047
9	61272419	61272622
9	63231678	63231945
9	63232633	63232877
9	63233928	63234302
9	63304698	63305051
9	63305142	63305512
9	63362589	63362825
9	63363693	63363926
9	63377130	63377713
9	63378450	63378656
9	63378707	63378947
9	63389870	63390090
9	63391619	63391858
9	63394341	63394806
9	63397201	63397403
9	63401378	63401603
9	63404313	63404511
9	63412363	63412613
9	63423543	63424215
9	63424717	63424915
9	63428508	63428854
9	63473248	63473479
9	63473911	63474111
9	63475432	63475637
9	63476767	63476967
9	63479030	63479235
9	63479836	63480036
9	63498080	63498279
9	69847434	69847658
9	82740035	82740290
9	90136595	90136799
9	92953390	92953599
9	104861935	104862133
9	109582072	109582435
9	109911427	109911636
9	129432322	129432534
9	134076159	134076473
9	137288488	137288789
9	138380268	138380466
9	138490307	138490505
9	139498675	139498941
10	1766402	1766618
10	7153180	7153448
10	9214506	9214736
10	9505378	9505576
10	19282385	19282717
10	19285247	19285855
10	19287769	19287990
10	24725372	24725588
10	28066526	28066853
10	28783205	28783642
10	29349232	29349481
10	35076048	35076295
10	40154275	40154537
10	40668548	40668863
10	41854689	41854887
10	43018658	43018856
10	43097226	43097563
10	44367988	44368207
10	51446884	51447126
10	61179160	61179495
10	65131050	65131248
10	66472133	66472331
11	16047624	16047873
11	17024785	17025009
11	27800666	27800872
11	29960478	29960676
11	32337374	32337573
11	33072521	33072767
11	34664820	34665018
11	34795496	34795758
11	35612787	35613028
11	35806077	35806372
11	35871237	35871455
11	36040024	36040243
11	36684690	36684888
11	46717364	46717669
11	56367084	56367282
11	57529056	57529254
11	59792367	59792592
11	66772865	66773070
11	73534510	73534708
11	73604323	73604649
12	7401234	7401432
12	9133918	9134186
12	9289355	9289553
12	9478326	9478545
12	9628831	9629032
12	18085301	18085727
12	30079057	30079435
12	33347910	33348110
12	36068796	36068994
12	51115131	51115329
12	58676962	58677229
12	61597867	61598496
12	61598770	61598989
13	15295	15553
13	23280	23529
13	42284	42559
13	43969	44172
13	55471	55733
13	60887	61129
13	109359	109582
13	126866	127162
13	137687	137927
13	139628	139869
13	140834	141235
13	212495	212693
13	9214126	9214332
13	11620172	11620370
13	15635519	15635717
13	47635473	47635698
13	58631384	58631592
13	61571881	61572081
13	62351618	62351816
13	73040995	73041193
13	79674733	79674979
13	82201710	82201908
13	85549727	85549939
13	87754810	87755008
13	93156021	93156255
13	101559220	101559481
13	101841525	101841755
13	102053347	102053554
13	103594013	103594212
13	107017865	107018320
13	119346270	119346472
13	127771970	127772170
13	131141032	131141369
13	131251215	131251451
13	131260336	131260673
13	131307693	131307916
13	131684326	131684556
13	131910707	131910905
13	132694061	132694259
13	135297600	135297798
13	163473526	163473724
13	164224886	164225155
13	164511806	164512033
13	167770920	167771118
13	190969265	190969463
13	194335540	194335874
13	194336804	194337008
13	198355256	198355454
13	199104218	199104416
13	201198942	201199197
13	202349500	202349698
13	202576859	202577105
14	448333	448598
14	1315557	1315827
14	10383288	10383601
14	10866815	10867061
14	20611285	20611728
14	24813707	24814001
14	40310573	40310783
14	52812854	52813052
14	53331983	53332181
14	54428641	54428971
14	62977750	62978032
14	65076658	65076877
14	67090885	67091083
14	76636894	76637131
14	82777275	82777555
14	91583401	91583639
14	92502910	92503164
14	92730778	92731007
14	97440038	97440236
14	116342399	116342619
14	128149479	128149777
14	128532072	128532272
15	983	1249
15	2777	3144
15	4011	4213
15	1129351	1129549
15	5929584	5930103
15	6530032	6530276
15	15740959	15741192
15	18362663	18362871
15	23826343	23826593
15	24305294	24305506
15	24567837	24568083
15	28768795	28768993
15	28922465	28922663
15	29239597	29239937
15	30276779	30277032
15	30606566	30606764
15	32514148	32514346
15	33429990	33430199
15	42591136	42591335
15	45691611	45691834
15	56314360	56314652
15	58021426	58021712
15	65708392	65708598
15	80331994	80332192
15	88405307	88405533
15	89735120	89735345
15	90905293	90905527
15	109635689	109635959
15	115217451	115217929
15	116999763	117000036
15	122455189	122455400
15	122702562	122702794
15	123955547	123955811
15	126762105	126762377
15	126762524	126762766
15	132209278	132209663
15	132317980	132318287
15	138158458	138158682
15	138657520	138657851
15	138793247	138793501
16	3594	3833
16	8252	9823
16	17550	17998
16	6725359	6725624
16	7242633	7243008
16	11674510	11674723
16	15594398	15594611
16	17943279	17943477
16	29315313	29315554
16	30771812	30772056
16	33674864	33675070
16	42139673	42139884
16	44634891	44635110
16	46266171	46266404
16	50886732	50886939
16	50887372	50887678
16	51469890	51470088
16	51498676	51498874
16	51717420	51717640
16	52656644	52656885
16	64081893	64082116
16	66384785	66385104
16	70082872	70083136
16	74153569	74153767
16	78565807	78566005
16	78647044	78647242
17	3988879	3989138
17	5996826	5997080
17	10335170	10335385
17	10400220	10400447
17	13561998	13562263
17	14369363	14369561
17	21404044	21404278
17	24821817	24822015
17	35291876	35292094
17	37348312	37348510
17	40704969	40705167
17	43411704	43411916
17	47882081	47882279
17	47882532	47882730
17	55682999	55683206
17	57499537	57499743
17	62754272	62754555
17	63385357	63386289
17	63386564	63386804
17	63386886	63387329
17	63388609	63388808
17	63416509	63416730
17	63433946	63434197
17	63447437	63447686
17	63449584	63449859
17	63450031	63450269
17	63453523	63453726
17	63455044	63455245
17	63469048	63469286
18	2465997	2466195
18	4969192	4969687
18	35967047	35967245
18	48104696	48104908
X	23352842	23353040
X	29797568	29797774
X	29874897	29875185
X	32506184	32506387
X	40270229	40270429
X	51796475	51796766
X	61260795	61261006
X	100278284	100278570
X	109530809	109531068
X	115580580	115580778

## Sheet: Distal promoter DHSs in VAT
Chromosome	Start site	End site
1	7223973	7224171
1	9257548	9257746
1	18151876	18152128
1	36301677	36301915
1	42911163	42911361
1	82738349	82738570
1	87336277	87336596
1	99821847	99822088
1	126716537	126716780
1	128483460	128483670
1	128808918	128809237
1	132827935	132828133
1	223753262	223753460
1	243464921	243465201
1	250595823	250596065
1	262965624	262965822
1	263444022	263444297
1	263696937	263697167
1	271320236	271320434
2	14759994	14760199
2	25204958	25205156
2	45782773	45783043
2	57390548	57390755
2	57523003	57523201
2	60286702	60286900
2	61349156	61349430
2	62110587	62110785
2	71060284	71060637
2	79163078	79163276
2	104332247	104332445
2	112436597	112436795
2	115569474	115569715
2	119821866	119822064
2	149053824	149054062
3	7669372	7669593
3	8223630	8223862
3	8854641	8854847
3	14964126	14964367
3	25048220	25048549
3	38063105	38063336
3	41850713	41851071
3	41851329	41851683
3	73516062	73516716
3	113216753	113216951
4	29364229	29364427
4	50610594	50610792
4	82521331	82521577
4	84933705	84933920
4	96398661	96398980
4	97340939	97341149
4	122965392	122965618
4	124605375	124605573
5	758159	758392
5	985865	986100
5	4273280	4273523
5	14358425	14358623
5	20020467	20020713
5	43033852	43034229
5	62420235	62420525
5	62907106	62907304
5	90131448	90131723
6	2137273	2137471
6	9938987	9939185
6	21388824	21389040
6	49665501	49665850
6	49840245	49840443
6	56289542	56289779
6	63244704	63245037
6	68698879	68699607
6	76655106	76655351
6	78692486	78692813
6	116336043	116336241
6	127819174	127819372
6	144144943	144145205
6	144608247	144608492
6	144954397	144954631
6	165240575	165240773
6	168217161	168217395
7	527937	528175
7	86227773	86228050
7	92364512	92364710
7	93467498	93467701
7	98430081	98430644
7	106818116	106818324
7	112147023	112147252
7	112916180	112916446
8	955	1738
8	2237	2435
8	5583	5943
8	12224	12484
8	2650701	2650953
8	7385563	7385769
8	33284426	33284624
8	53792472	53792725
8	65826618	65826816
8	74439276	74439773
8	75656382	75656589
8	131061508	131061706
9	5297461	5297729
9	9920568	9920833
9	15232648	15233062
9	20167443	20167641
9	42049454	42049652
9	65429158	65429356
9	70131334	70131538
9	74519326	74519524
9	86071768	86072235
9	91832712	91832935
9	121767012	121767261
9	134905455	134905664
10	2500310	2500604
10	19261110	19261308
10	19414825	19415044
10	19416293	19416602
10	22711343	22711560
10	39875198	39876039
10	42980453	42980683
10	59649752	59650026
11	7398336	7398534
11	14927077	14927399
11	66948866	66949093
11	70920716	70921017
12	160985	161183
12	629101	629330
12	3988206	3988473
12	4925375	4925573
12	20364158	20364356
12	24747354	24747552
12	38011438	38011636
12	56385128	56385326
13	19935391	19935629
13	23994264	23994462
13	27558510	27558708
13	27928061	27928259
13	31564193	31564467
13	31564845	31565086
13	67889142	67889340
13	71957378	71957576
13	79841295	79841582
13	82440383	82440635
13	97014315	97014513
13	177288611	177288952
13	198089705	198089903
13	206394460	206394662
14	11016692	11016890
14	15118757	15119089
14	15136148	15136346
14	15196643	15196859
14	15288174	15288377
14	20132761	20133005
14	21327599	21327797
14	30530446	30530751
14	34321892	34322237
14	60476451	60476677
14	74217036	74217395
14	129546685	129546915
14	139670067	139670377
14	141751904	141752142
15	21066	21408
15	21505	21757
15	23822	24118
15	26358	26976
15	33053	33286
15	34378	34663
15	975447	975662
15	6166895	6167098
15	17207169	17207367
15	31518783	31519068
15	32482576	32482805
15	35812816	35813014
15	46946426	46946656
15	56830536	56830734
15	85943114	85943473
15	134168091	134168359
16	23289	24056
16	3544437	3544658
16	26456426	26456624
16	27772676	27772959
16	61729803	61730028
16	67541353	67541551
16	69187915	69188113
16	78738888	78739095
17	1763986	1764257
17	11156047	11156337
17	26555618	26555816
17	30328720	30328976
17	32564772	32564970
17	36669471	36669669
17	38478253	38478469
17	46764935	46765183
17	47244714	47244912
17	63366386	63366913
17	63367476	63367674
18	50031426	50031624
X	15601437	15601653
X	15684480	15684699
X	22068676	22069331
X	26962636	26962834
X	48997505	48997725
X	51133960	51134220
X	55289842	55290040
X	58646790	58647087
X	59080257	59080455
X	64890803	64891004
X	77640431	77640703
X	124580613	124580811

## Sheet: Proximal promoter DHSs in VAT
Chromosome	Start site	End site
1	2374758	2375030
1	2541069	2541614
1	2792460	2792658
1	8935127	8935381
1	18513081	18513349
1	21231108	21231468
1	34693255	34693537
1	35696620	35696818
1	40180280	40180532
1	43392522	43392838
1	44239152	44239452
1	54633633	54633831
1	74627985	74628183
1	77159176	77159473
1	82161522	82161832
1	85539642	85540015
1	86954438	86954636
1	90650526	90650812
1	92421743	92421983
1	95950654	95950881
1	99940033	99940321
1	103794222	103794452
1	113084914	113085218
1	127125770	127125995
1	138341002	138341265
1	141886938	141887194
1	158862636	158862895
1	163790133	163790482
1	169671477	169671832
1	169915881	169916169
1	179611119	179611317
1	180933820	180934018
1	181681147	181681426
1	182202980	182203231
1	182423350	182423750
1	183792614	183792842
1	189248839	189249142
1	190624904	190625355
1	194351873	194352071
1	194439770	194439979
1	199631724	199631949
1	202258667	202258973
1	207252105	207252577
1	217001985	217002311
1	217204958	217205176
1	219210378	219210617
1	219815320	219815528
1	228141834	228142087
1	232355468	232355901
1	234370594	234370839
1	239492646	239492908
1	248447753	248448055
1	252651457	252651911
1	253092893	253093179
1	261256691	261256889
1	262356104	262356347
1	265867055	265867253
1	265934834	265935102
1	267924842	267925380
1	268266320	268266530
1	268935870	268936103
1	270761386	270761584
2	4523422	4523640
2	5357499	5357945
2	8361757	8362047
2	9163069	9163298
2	11689400	11689598
2	13275923	13276209
2	16620241	16620565
2	26094861	26095059
2	26533748	26533957
2	26826853	26827160
2	36884635	36884920
2	44012579	44012783
2	44375313	44375546
2	46025238	46025482
2	48666158	48666399
2	49894426	49894745
2	58267284	58267579
2	58517630	58517839
2	59276931	59277129
2	59530810	59531026
2	61450616	61450888
2	64761355	64761617
2	67907693	67907891
2	69413760	69413959
2	73889890	73890365
2	74626605	74626803
2	76337804	76338162
2	77323948	77324163
2	77563218	77563483
2	78876765	78876963
2	84537862	84538060
2	87778052	87778484
2	89045259	89045478
2	95018426	95018689
2	105203001	105203418
2	113773948	113774486
2	117838183	117838399
2	119722844	119723237
2	134093371	134093619
2	135283710	135283987
2	137038025	137038267
2	140504184	140504549
2	140532046	140532316
2	141879014	141879329
2	142166044	142166334
2	143688816	143689014
2	147788982	147789247
2	150662239	150662664
3	4643978	4644176
3	5117889	5118134
3	6921161	6921359
3	7174441	7174716
3	8468002	8468279
3	8511433	8511631
3	8531312	8531510
3	9994541	9994866
3	17635833	17636212
3	18609712	18609987
3	19559435	19559724
3	19609639	19609885
3	22740308	22740642
3	26653672	26654023
3	31375782	31375989
3	36548844	36549047
3	37555230	37555428
3	40092257	40092681
3	41344035	41344379
3	42022519	42022857
3	45888200	45888436
3	46196870	46197068
3	46546719	46547039
3	46547319	46547602
3	47601268	47601566
3	47759093	47759329
3	56277249	56277451
3	57423800	57424111
3	58096775	58097003
3	58354858	58355065
3	59202305	59202536
3	68584616	68584872
3	71362439	71362687
3	72545213	72545564
3	76837153	76837479
3	77192099	77192793
3	77740355	77740553
3	80254566	80254880
3	80255016	80255350
3	80746066	80746384
3	85649782	85650150
3	86180028	86180226
3	92336754	92337022
3	92337080	92337350
3	93371597	93371803
3	93854341	93854613
3	97199441	97199643
3	101957064	101957262
3	103249452	103249818
3	107508767	107509042
3	111328212	111328458
3	112272595	112272793
3	112924277	112924548
3	119453854	119454052
4	3028847	3029120
4	8485751	8485949
4	14297639	14297837
4	15182126	15182609
4	15998874	15999176
4	19146570	19146903
4	21215497	21215785
4	28013993	28014234
4	34431579	34431781
4	34645558	34645811
4	34823777	34824063
4	35767810	35768112
4	41655630	41655828
4	42930955	42931183
4	46912369	46912632
4	48555664	48555944
4	51468794	51469005
4	64710684	64710918
4	68119759	68119957
4	80190703	80190945
4	81509789	81510087
4	83070104	83070382
4	83776423	83776727
4	90722137	90722384
4	93325318	93325531
4	95944814	95945052
4	99348392	99348639
4	99712130	99712328
4	100478982	100479180
4	103376827	103377187
4	106656597	106656811
4	107416847	107417082
4	109096711	109096930
4	109786218	109786416
4	111006895	111007102
4	130644868	130645103
5	716767	716971
5	4219372	4219615
5	7085449	7085647
5	7106447	7106666
5	13983471	13983669
5	15063835	15064110
5	15097718	15097916
5	18266455	18266658
5	18338712	18338920
5	18588421	18588702
5	19522480	19522678
5	21373062	21373337
5	35691988	35692382
5	39363671	39363892
5	48555486	48555778
5	56736850	56737111
5	57749796	57750008
5	62546254	62546574
5	63707563	63707768
5	64166862	64167060
5	67106515	67106713
5	69779154	69779435
5	76635401	76635713
5	79356007	79356273
5	79492530	79492801
5	82361614	82361850
5	89728084	89728314
6	455466	455721
6	18503621	18503821
6	18512068	18512322
6	18901164	18901362
6	19573782	19573980
6	28195429	28195637
6	29339694	29339922
6	31747254	31747515
6	32013960	32014158
6	34121233	34121445
6	36360465	36360726
6	39373693	39373891
6	43164878	43165113
6	47252948	47253170
6	48728982	48729180
6	49152340	49152627
6	49178607	49179107
6	50374000	50374211
6	51359727	51359946
6	52937614	52937856
6	53275262	53275686
6	53868870	53869122
6	54684896	54685094
6	54685875	54686201
6	54718541	54718805
6	54786024	54786270
6	55991330	55991654
6	58501625	58501855
6	59450482	59450690
6	67605502	67605876
6	69934649	69934847
6	70241506	70241963
6	75015362	75015669
6	77707901	77708119
6	82309154	82309495
6	85185672	85185903
6	85307157	85307355
6	87687456	87687658
6	88659846	88660044
6	95322070	95322286
6	98598230	98598523
6	100092780	100092986
6	101757450	101757677
6	119719234	119719449
6	128030205	128030507
6	146987433	146987654
6	153882240	153882452
6	164197310	164197521
6	164207963	164208190
6	166645027	166645301
6	168736480	168736678
6	170763430	170763888
7	4686827	4687061
7	8093488	8093836
7	13845930	13846134
7	25809107	25809392
7	27335251	27335467
7	28765321	28765676
7	29694412	29694678
7	31791392	31791592
7	32787836	32788112
7	36410375	36410624
7	38569434	38569799
7	54906794	54907143
7	55811606	55811820
7	56540323	56540532
7	57040775	57040973
7	57503603	57503869
7	61113456	61113694
7	75180954	75181243
7	75951068	75951314
7	76431781	76432056
7	77719405	77719603
7	81669604	81669905
7	86103522	86103802
7	88576434	88576639
7	89168135	89168342
7	90346502	90346709
7	96406532	96406731
7	98203712	98203910
7	98821829	98822233
7	104009367	104009565
7	104189640	104189850
7	112160540	112160738
7	116436445	116436662
7	116787266	116787473
7	117241821	117242121
7	120486727	120487083
8	1387543	1387896
8	1626941	1627139
8	3797117	3797380
8	12590366	12590564
8	29190249	29190715
8	30463561	30463848
8	30759704	30760070
8	30840187	30840599
8	43745515	43745906
8	76270367	76270580
8	84224944	84225158
8	86690534	86690796
8	95949391	95949625
8	96855957	96856229
8	99782672	99782984
8	102387957	102388385
8	104560481	104560679
8	105121360	105121558
8	110089769	110089967
8	110200454	110200653
8	135431511	135431759
8	135844357	135844598
9	104773	104971
9	2329943	2330141
9	4700882	4701267
9	4701599	4701830
9	5258328	5258526
9	7202454	7202796
9	8513014	8513242
9	8761793	8761991
9	10454102	10454300
9	32810793	32811016
9	33041382	33041673
9	35903949	35904198
9	35960117	35960376
9	36620598	36620910
9	39368398	39368597
9	44471731	44471962
9	46276973	46277205
9	46590274	46590472
9	51918654	51918919
9	52726504	52726950
9	65066764	65066962
9	68508750	68509019
9	68983278	68983489
9	71895585	71895783
9	75260282	75260554
9	81837549	81837799
9	82225818	82226062
9	88785596	88785960
9	90337225	90337423
9	102348692	102348890
9	104910574	104910838
9	105985186	105985479
9	106161932	106162439
9	106965619	106966178
9	108320226	108320448
9	109384434	109384648
9	116402250	116402463
9	117064097	117064384
9	131076350	131077107
10	12431749	12431947
10	13711327	13711525
10	13897874	13898154
10	14597209	14597407
10	15264328	15264526
10	17365304	17365630
10	24464876	24465083
10	24923536	24923820
10	24974034	24974483
10	25202201	25202399
10	25635895	25636251
10	25707290	25707621
10	29065854	29066052
10	30975944	30976157
10	32160541	32160802
10	32170285	32170483
10	39798223	39798533
10	41804491	41804748
10	42693408	42693674
10	55700324	55700522
10	57829382	57829580
10	65108366	65108594
10	65267434	65267736
11	630498	630733
11	16375109	16375429
11	18517838	18518328
11	22144867	22145065
11	65229753	65230209
12	3643456	3643654
12	5564941	5565218
12	11715050	11715469
12	14572259	14572618
12	14764408	14764694
12	15192092	15192314
12	15350895	15351255
12	16810646	16810852
12	17211358	17211642
12	19787980	19788226
12	20220771	20220969
12	20796263	20796858
12	23723335	23723541
12	23804713	23804941
12	24153831	24154142
12	24351172	24351370
12	25971384	25971620
12	27370186	27370388
12	34771129	34771560
12	35433097	35433342
12	36111415	36111727
12	37728895	37729137
12	42529668	42529866
12	45506507	45506705
12	47528626	47528854
12	49918731	49918929
12	51527029	51527326
12	52868223	52868474
12	52903492	52903771
12	52954595	52954793
12	53376828	53377085
12	58568406	58568604
12	60651805	60652019
12	61585297	61585506
13	18557952	18558252
13	18649679	18649913
13	21877601	21877799
13	26669155	26669353
13	30601900	30602227
13	32320029	32320230
13	32444812	32445018
13	33658082	33658329
13	34826389	34826587
13	39088971	39089275
13	47743350	47743548
13	68657809	68658007
13	73900983	73901294
13	77180773	77180975
13	77181224	77181704
13	79797141	79797421
13	80264697	80264947
13	84108216	84108422
13	90761275	90761610
13	90971333	90971569
13	95743596	95743794
13	97002260	97002614
13	100442271	100442495
13	108435486	108435684
13	118088160	118088358
13	123930119	123930407
13	125781725	125782023
13	127571703	127572064
13	130094576	130094774
13	133560777	133560983
13	134353315	134353526
13	134718382	134718635
13	140135986	140136249
13	140566822	140567210
13	140758491	140758795
13	144855441	144855784
13	147775752	147776094
13	148087561	148087902
13	151429248	151429511
13	153480854	153481059
13	158729077	158729443
13	159191934	159192197
13	160063783	160064103
13	167895625	167896064
13	173634614	173634907
13	177275502	177275700
13	197093202	197093535
13	199997108	199997341
13	200925940	200926270
14	9517715	9518075
14	15330121	15330319
14	16709626	16709963
14	22654287	22654561
14	28256909	28257183
14	29658843	29659075
14	30498746	30498944
14	30991845	30992107
14	32841696	32841897
14	38698605	38698882
14	39579754	39579982
14	40455765	40456026
14	45995470	45995760
14	47799525	47799729
14	48543960	48544214
14	50978533	50978819
14	51342932	51343264
14	51667870	51668078
14	51708125	51708374
14	51711854	51712055
14	51720595	51720793
14	55450287	55450521
14	59192144	59192400
14	61048081	61048372
14	61655363	61655617
14	61688569	61688871
14	75117664	75117902
14	75918817	75919202
14	76836119	76836317
14	76864103	76864421
14	77405008	77405506
14	85923345	85923570
14	92115878	92116076
14	92382117	92382407
14	108724701	108724899
14	109008196	109008397
14	109052184	109052409
14	110635997	110636195
14	112398641	112398844
14	113498604	113498810
14	113889953	113890151
14	115173931	115174136
14	115217802	115218123
14	129467216	129467443
14	132523266	132523464
14	140703102	140703316
14	141393964	141394167
14	141618236	141618434
15	4096412	4096661
15	16206282	16206646
15	23470184	23470382
15	24896007	24896273
15	54725302	54725557
15	56437983	56438235
15	59453372	59453874
15	63593178	63593625
15	68985038	68985237
15	81805658	81805898
15	82958082	82958352
15	91604477	91604687
15	101211093	101211343
15	101337798	101338298
15	101373479	101373731
15	101390702	101390982
15	101601183	101601409
15	110873804	110874111
15	120590181	120590379
15	133180525	133180786
16	5714245	5714684
16	6145494	6145729
16	18537917	18538284
16	25803689	25803899
16	27957338	27957536
16	34702734	34702932
16	36217165	36217398
16	38800658	38800872
16	40105300	40105578
16	46434618	46435024
16	49048785	49048988
16	55313106	55313304
16	72317365	72317563
16	74270895	74271128
17	5596828	5597108
17	10691212	10691427
17	14476108	14476397
17	17914926	17915256
17	26719029	26719242
17	30350945	30351383
17	31828401	31828824
17	36989841	36990039
17	38515095	38515319
17	40774696	40774942
17	47297713	47297911
17	50869122	50869445
18	553914	554178
18	19875653	19875927
18	32798056	32798360
18	33221142	33221517
18	36583969	36584419
18	42410582	42410893
18	50684545	50684743
18	50758586	50758784
18	51038132	51038374
X	11509920	11510123
X	12808270	12808577
X	16312279	16312785
X	16449574	16449793
X	36989807	36990215
X	41089967	41090179
X	42999414	42999684
X	43327454	43327766
X	46441486	46441786
X	54616239	54616532
X	57699574	57699780
X	59608476	59608688
X	123088501	123088699
X	124204202	124204435
X	124885403	124885690

## Sheet: Gene body DHSs in VAT
Chromosome	Start site	End site
1	2352564	2352763
1	2894430	2894628
1	2971604	2971829
1	8007812	8008012
1	8172822	8173045
1	9936940	9937163
1	15942804	15943046
1	16139649	16139862
1	16171930	16172250
1	20979374	20979572
1	27466275	27466542
1	33277193	33277500
1	36934989	36935191
1	37169129	37169327
1	43315147	43315345
1	43479628	43479872
1	52869985	52870384
1	53180198	53180396
1	63956151	63956362
1	64295398	64295687
1	66847499	66847698
1	71613628	71613879
1	72305350	72305577
1	75243430	75243725
1	75244068	75244326
1	75538325	75538550
1	76458394	76458717
1	77400996	77401325
1	80121357	80121555
1	83089428	83089628
1	92292120	92292361
1	96729014	96729342
1	99862199	99862446
1	99909209	99909417
1	100496735	100496995
1	103023450	103023648
1	104062876	104063131
1	110365672	110366119
1	111241700	111241940
1	113440095	113440293
1	117625071	117625269
1	120291209	120291430
1	131447923	131448125
1	134207944	134208142
1	139739521	139739719
1	139925537	139925842
1	140333039	140333244
1	142936543	142936789
1	144218429	144218640
1	144577843	144578041
1	146133575	146133788
1	146335895	146336164
1	148033867	148034065
1	156435138	156435336
1	158641718	158641916
1	159022419	159022617
1	161587752	161588297
1	162260025	162260223
1	162601784	162602083
1	164143683	164143881
1	164155408	164155652
1	164753072	164753271
1	165058677	165058881
1	165090125	165090336
1	165192529	165192730
1	165437001	165437222
1	166270885	166271125
1	169083471	169083670
1	171244230	171244475
1	181995701	181995902
1	184403198	184403421
1	188349371	188349578
1	188981771	188982057
1	189622271	189622469
1	190205776	190206061
1	193078560	193078891
1	194351433	194351662
1	205402683	205402881
1	207444559	207444805
1	210307934	210308192
1	215970118	215970405
1	216116147	216116483
1	216366830	216367103
1	221269045	221269359
1	222119780	222119990
1	226100145	226100364
1	226100626	226100824
1	228092108	228092314
1	229281858	229282147
1	230227598	230227821
1	235772758	235773015
1	236632571	236632958
1	238254118	238254316
1	239173484	239173718
1	239975192	239975454
1	240023992	240024207
1	240748210	240748411
1	247766332	247766531
1	248379733	248379964
1	250239724	250239922
1	251164471	251164669
1	253656317	253656629
1	253988142	253988340
1	257191257	257191455
1	257359157	257359442
1	261354486	261354684
1	262061453	262061651
1	264027987	264028185
1	264278759	264278990
1	267570756	267570990
1	268364737	268365012
1	269676115	269676375
1	271181880	271182089
1	272711092	272711348
1	274070904	274071297
2	1130685	1130883
2	2427089	2427319
2	5025801	5026030
2	5212573	5212801
2	6044015	6044214
2	6367624	6367948
2	7924780	7925017
2	8994102	8994328
2	9098254	9098502
2	11876042	11876362
2	12381851	12382064
2	12398165	12398365
2	16207885	16208083
2	18055641	18055841
2	27326920	27327467
2	27329906	27330220
2	27419558	27420202
2	27421140	27421587
2	27466438	27466717
2	27880664	27880862
2	28206566	28206866
2	28995874	28996093
2	45165638	45165836
2	45805840	45806108
2	46890977	46891272
2	46904512	46904743
2	52311879	52312080
2	59134289	59134526
2	59409179	59409550
2	59946291	59946504
2	61128072	61128602
2	62316009	62316207
2	64350286	64350484
2	65676549	65676747
2	66475495	66475801
2	66950379	66950671
2	69339722	69339925
2	72909413	72909719
2	73206867	73207255
2	74535464	74535773
2	74905241	74905504
2	77340152	77340350
2	81308647	81308882
2	83078439	83078718
2	86529701	86530033
2	87133335	87133566
2	88078148	88078424
2	89057560	89057782
2	90233348	90233571
2	96414742	96414940
2	96426496	96426694
2	96681875	96682124
2	97647694	97647892
2	100606005	100606227
2	102424391	102424650
2	103568940	103569145
2	105046610	105046849
2	117313861	117314059
2	117742873	117743083
2	118831567	118831765
2	119500518	119500716
2	123158167	123158365
2	126271248	126271552
2	130336449	130336763
2	130360480	130360699
2	130443925	130444196
2	136170726	136170987
2	139723613	139723859
2	144756014	144756214
2	147188707	147188905
2	148680418	148680637
2	149477979	149478177
2	149562241	149562484
3	108710	108964
3	118175	118560
3	629163	629361
3	1952915	1953245
3	3570261	3570481
3	4587815	4588207
3	5138373	5138602
3	6923411	6923611
3	6924572	6924831
3	6924895	6925125
3	6928160	6928378
3	7063728	7064042
3	7274698	7274896
3	11970483	11970683
3	12299410	12299682
3	14217705	14217940
3	14524983	14525336
3	15943258	15943739
3	16012640	16012871
3	16392780	16392985
3	17107960	17108158
3	22182446	22182733
3	24260588	24260786
3	24288947	24289149
3	25977787	25977993
3	28576578	28576776
3	28583923	28584121
3	31094806	31095004
3	31132914	31133174
3	31759970	31760168
3	32821333	32821554
3	33041974	33042181
3	35834975	35835194
3	36863331	36863944
3	37928450	37928648
3	38462343	38462618
3	39171604	39171823
3	42128997	42129278
3	42296742	42296968
3	42633204	42633402
3	42667223	42667497
3	42741734	42741969
3	42757173	42757466
3	42911335	42911675
3	42936349	42936638
3	43455859	43456057
3	43552437	43552677
3	43552734	43553504
3	45916879	45917116
3	46066748	46066974
3	47338151	47338349
3	48012913	48013282
3	48685150	48685369
3	50152101	50152327
3	51522892	51523090
3	53956072	53956329
3	54163825	54164052
3	55584302	55584544
3	56610356	56610600
3	56811339	56811554
3	59167708	59167935
3	63697716	63697914
3	63845130	63845349
3	64032214	64032425
3	67531433	67531732
3	67878019	67878248
3	69067429	69067627
3	69206033	69206236
3	71180565	71180941
3	71212417	71212618
3	71599809	71600008
3	73630350	73630615
3	75189565	75189766
3	86624785	86625147
3	97830723	97830949
3	101206351	101206549
3	109880879	109881091
3	111067353	111067584
3	111396411	111396609
3	115164948	115165178
3	117527891	117528133
3	128903907	128904108
3	129136184	129136452
3	131236959	131237858
4	180463	180661
4	523038	523282
4	1358473	1358671
4	3277168	3277366
4	3562191	3562393
4	4486651	4486901
4	6893092	6893290
4	7765163	7765538
4	8750489	8750702
4	8834763	8834961
4	11764557	11764755
4	31254601	31254805
4	32853614	32853812
4	34998311	34998572
4	35976742	35976940
4	52435281	52435481
4	53952984	53954294
4	55861491	55861750
4	55996676	55996912
4	56538175	56538378
4	61628494	61628776
4	62266900	62267170
4	63271119	63271396
4	70176575	70176890
4	72672146	72672344
4	74689592	74689790
4	74689892	74690134
4	76587169	76587397
4	77628431	77628629
4	77997001	77997212
4	78614287	78614485
4	79936503	79936701
4	81967347	81967552
4	85869395	85869593
4	89108282	89108581
4	91308979	91309215
4	92015755	92015953
4	92028341	92028844
4	96938106	96938348
4	97368866	97369064
4	99997532	99997730
4	100426109	100426416
4	101443578	101443776
4	103436605	103436803
4	103581367	103581787
4	104151751	104151951
4	107295451	107295722
4	107550309	107550507
4	108011457	108011655
4	108863047	108863273
4	110622075	110622333
4	111293803	111294078
4	112188859	112189139
4	112303337	112303550
4	117791910	117792297
4	122314295	122314493
4	122634888	122635220
4	122857791	122858041
4	124780124	124780322
4	126033216	126033414
4	126968479	126968682
4	127372383	127372581
4	130298342	130298612
5	4832227	4832429
5	6269337	6269580
5	7776808	7777128
5	11250912	11251131
5	12220819	12221018
5	13397319	13397548
5	13664878	13665145
5	13832532	13832730
5	14806741	14806991
5	15619372	15619679
5	17332313	17332652
5	18878579	18878863
5	19483895	19484251
5	20449343	20449694
5	21356564	21356871
5	21395441	21395664
5	22151059	22151285
5	22447453	22447696
5	27415662	27415886
5	29248194	29248392
5	44529770	44530017
5	46627031	46627299
5	49832844	49833068
5	61338041	61338239
5	63939919	63940185
5	64058500	64058844
5	67305060	67305359
5	71424191	71424447
5	71547629	71547827
5	73637321	73637572
5	79361305	79361561
5	87280123	87280774
5	88971499	88971823
5	90228163	90228651
5	90234467	90234724
5	90244858	90245124
5	90245631	90245922
5	90249033	90249250
5	90936506	90936704
6	353907	354195
6	464586	464785
6	1448433	1448658
6	1627589	1627797
6	2638086	2638384
6	4269620	4269833
6	5792004	5792337
6	6978624	6978822
6	7690776	7690993
6	9215874	9216072
6	9298933	9299149
6	9960696	9961032
6	10328391	10328820
6	10634861	10635059
6	12905421	12905619
6	15085672	15085870
6	18500092	18500333
6	18506206	18506448
6	18663837	18664035
6	18669637	18669843
6	20066519	20066763
6	21011871	21012104
6	23926608	23926806
6	29115417	29115631
6	29118259	29118630
6	29120548	29120772
6	32608364	32608572
6	34548508	34548706
6	36172981	36173195
6	37943653	37943851
6	40439447	40439660
6	40594661	40595137
6	40725470	40725670
6	42637821	42638040
6	44056776	44057080
6	44280127	44280554
6	45360616	45360862
6	48061627	48061856
6	48711641	48711839
6	49020604	49020841
6	49272829	49273147
6	51168615	51168945
6	51445079	51445371
6	53065465	53065699
6	54500556	54500810
6	54553319	54553517
6	54882222	54882448
6	55410369	55410567
6	55804828	55805114
6	56551590	56551788
6	58549894	58550248
6	58551173	58551484
6	58551610	58552887
6	58553396	58553712
6	60195672	60195918
6	60526917	60527115
6	62763836	62764121
6	62968160	62968478
6	63354501	63354737
6	64000803	64001199
6	64206868	64207237
6	66897111	66897309
6	67849220	67849418
6	68643647	68643908
6	69461614	69461812
6	69777539	69777737
6	71978307	71978505
6	73732114	73732312
6	77638255	77638453
6	77651905	77652123
6	83687699	83687948
6	83933628	83933827
6	84417995	84418193
6	91588498	91588696
6	96008698	96008896
6	96561688	96561893
6	97656833	97657070
6	98300634	98300867
6	102364306	102364505
6	111146274	111146726
6	112553813	112554041
6	116218260	116218549
6	120626340	120626607
6	121302337	121302535
6	128174345	128174549
6	128196987	128197185
6	136806051	136806263
6	137000311	137000509
6	139008894	139009129
6	141440878	141441091
6	142091224	142091422
6	146266382	146266635
6	146273285	146273508
6	155147518	155147736
6	158262038	158262368
6	158729415	158729613
6	163212011	163212455
6	164524104	164524365
6	164526719	164527101
6	164684595	164684836
6	164686122	164686413
6	165757320	165757523
6	165847774	165847972
6	166899230	166899428
6	167973871	167974220
6	168036835	168037067
7	319474	319808
7	978846	979115
7	7876523	7876721
7	10867770	10868404
7	11521145	11521343
7	13825861	13826059
7	21606230	21606428
7	23823797	23823995
7	24583127	24583385
7	24586774	24586978
7	24592033	24592313
7	24604449	24604669
7	24604742	24605189
7	24605284	24605529
7	24605661	24605883
7	24610723	24611215
7	24613427	24614110
7	24994248	24994477
7	28660728	28660926
7	28774013	28774277
7	29084471	29084669
7	29126994	29127225
7	29507654	29507852
7	29942792	29943048
7	30666862	30667060
7	31791698	31791896
7	35748027	35748225
7	36760749	36760953
7	37225034	37225332
7	38456416	38456629
7	47528915	47529274
7	51186030	51186482
7	51305831	51306029
7	55523451	55523649
7	69528178	69528376
7	69571541	69571871
7	76036180	76036590
7	78476420	78476761
7	80462961	80463164
7	80874416	80874652
7	81103738	81103944
7	88215464	88215742
7	89130817	89131015
7	89295326	89295524
7	89765721	89765961
7	90859738	90859936
7	91601606	91601804
7	92865199	92865437
7	95739591	95739847
7	96798329	96798557
7	99491197	99491395
7	99612335	99612533
7	100123363	100123649
7	101286755	101286993
7	104180403	104180725
7	111593116	111593314
7	113148415	113148637
7	116740096	116740331
7	118367012	118367228
7	118381667	118381998
7	120292520	120292781
7	120597030	120597284
7	121832068	121832297
8	15834	16127
8	4265323	4265569
8	5311565	5311771
8	11818352	11818550
8	12487652	12487850
8	15316350	15316561
8	18360058	18360299
8	20492140	20492365
8	29414909	29415107
8	29453349	29453547
8	31384723	31384921
8	31747132	31747332
8	31841643	31841990
8	38850792	38850990
8	39612280	39612490
8	39706716	39706914
8	40145400	40145624
8	47607836	47608034
8	47686995	47687255
8	52714120	52714318
8	55875219	55875465
8	66207085	66207337
8	75542806	75543004
8	77433580	77433997
8	77557334	77557819
8	78756123	78756321
8	78854114	78854317
8	78950056	78950254
8	79277506	79277745
8	80304778	80305202
8	81748190	81748472
8	82044967	82045165
8	87069308	87069555
8	95974908	95975162
8	100847954	100848152
8	103120906	103121118
8	104547208	104547499
8	106705586	106705807
8	108790322	108790520
8	110201752	110201999
8	111956778	111956976
8	112246112	112246310
8	112452647	112452848
8	112717420	112717642
8	128868963	128869161
8	130283126	130283395
8	130347771	130348001
8	130466267	130466483
8	131320525	131320815
8	131874078	131874276
8	133787229	133787529
8	135916817	135917015
8	136557180	136557438
8	137405534	137405732
9	1336287	1336485
9	1824564	1824762
9	2341418	2341642
9	4699985	4700596
9	4701928	4702170
9	5657627	5657825
9	8504402	8504604
9	8586551	8586749
9	9199484	9199721
9	9329017	9329293
9	9968193	9968506
9	9980973	9981171
9	10970965	10971163
9	12928501	12928722
9	19593924	19594234
9	19609036	19609321
9	20264732	20264936
9	25422889	25423087
9	26403432	26403705
9	26874135	26874363
9	28021237	28021435
9	33031535	33031854
9	39453188	39453386
9	39770291	39770489
9	40775285	40775532
9	45252590	45252788
9	45335745	45335943
9	47422431	47422678
9	48095212	48095431
9	50532065	50532263
9	52564942	52565140
9	52841871	52842132
9	53851963	53852161
9	53882182	53882443
9	54035486	54035700
9	55947624	55947954
9	58460409	58460607
9	59282072	59282375
9	59657996	59658194
9	62326832	62327030
9	63644596	63644803
9	66285693	66285891
9	69321360	69321566
9	72193571	72193920
9	76583564	76583818
9	87021743	87022140
9	87086484	87086789
9	90980482	90980680
9	92124453	92124725
9	93307834	93308249
9	98229466	98229664
9	102536294	102536510
9	102936180	102936378
9	103056374	103056577
9	105388845	105389050
9	107688216	107688414
9	109260364	109260562
9	112931846	112932071
9	114035052	114035270
9	115760675	115760948
9	116170795	116170993
9	117460384	117460711
9	118670440	118670638
9	118900364	118900602
9	123032563	123032761
9	124799396	124799638
9	127539985	127540183
9	128447914	128448112
9	129542743	129542941
9	135812746	135813013
9	136212553	136212751
9	136716443	136716681
9	139383223	139383488
10	2315329	2315765
10	6903871	6904078
10	8267949	8268147
10	8552094	8552305
10	9586923	9587121
10	11138142	11138445
10	11835606	11835826
10	11861074	11861349
10	12555442	12555668
10	12688971	12689194
10	13381541	13381748
10	13976045	13976282
10	14006618	14006849
10	15206433	15206631
10	15296021	15296270
10	19170319	19170536
10	19428384	19428588
10	19451961	19452159
10	19456861	19457117
10	19483304	19483678
10	19484548	19484814
10	19869718	19870007
10	21081492	21081703
10	22587287	22587485
10	22796445	22796732
10	24615703	24615993
10	24930354	24930568
10	24944413	24944680
10	24952754	24953888
10	24954758	24955177
10	24959676	24959981
10	24961000	24962044
10	24966491	24966728
10	24974776	24975332
10	24975491	24976082
10	25314931	25315129
10	28468804	28469090
10	29174469	29174699
10	30975268	30975498
10	32079916	32080166
10	35475508	35475711
10	38243310	38243508
10	38505986	38506208
10	42789373	42789571
10	43928654	43928852
10	44594846	44595046
10	47609042	47609278
10	47840345	47840548
10	56156513	56156775
10	56285592	56285790
10	57993101	57993476
10	59251308	59251539
10	62279914	62280210
10	62303778	62304049
10	64059501	64059789
10	68840944	68841142
10	68872462	68872776
10	69177811	69178122
10	69293548	69293754
11	289157	289355
11	410236	410529
11	2768479	2768703
11	2784025	2784257
11	7759231	7759429
11	8834753	8835051
11	10464099	10464297
11	11710138	11710387
11	15141081	15141322
11	15409585	15409783
11	15904636	15904834
11	22254246	22254444
11	22687809	22688037
11	39226301	39226499
11	42119148	42119432
11	46285615	46285854
11	49088719	49088917
11	51863213	51863485
11	64234060	64234274
11	64265767	64265965
11	64272429	64272627
11	64985002	64985271
11	65364993	65365191
11	65604612	65604810
11	67501350	67501548
11	67550446	67550725
11	67597527	67597813
11	68445507	68445705
11	70043815	70044013
11	70318510	70318753
11	70828651	70828893
11	74208739	74208954
11	76874755	76875186
11	77270535	77270824
12	202113	202528
12	1204824	1205126
12	1491224	1491422
12	1802696	1802916
12	3559539	3559784
12	5193916	5194144
12	5714708	5714906
12	7819729	7820142
12	7991438	7991767
12	8562850	8563075
12	11496002	11496200
12	11805182	11805475
12	13011458	13011656
12	14548325	14548566
12	17863049	17863262
12	17946496	17946713
12	18077749	18078163
12	19701298	19701496
12	20426949	20427147
12	20662082	20662280
12	21358606	21358833
12	21436073	21436271
12	26768684	26768924
12	27369707	27369952
12	27988345	27988563
12	28191504	28191728
12	32061299	32061497
12	32125871	32126069
12	32891637	32891910
12	36943098	36943311
12	38074541	38074739
12	38174610	38174927
12	39982025	39982255
12	42249868	42250066
12	45221851	45222067
12	46996462	46996660
12	47061612	47061853
12	47818248	47818446
12	50509374	50509631
12	51949169	51949434
12	52659594	52659926
12	52804800	52805008
12	52805181	52805379
12	53438937	53439158
12	54697339	54697566
12	58134556	58134754
12	58539170	58539368
12	58564741	58564979
13	598232	598492
13	1417700	1417898
13	2714657	2714874
13	4084486	4084684
13	6257433	6257637
13	14300990	14301298
13	18539186	18539384
13	21077296	21077862
13	25163568	25163970
13	25665213	25665575
13	26228747	26228945
13	26805719	26805958
13	28548122	28548320
13	29996015	29996305
13	31491939	31492208
13	32195347	32195556
13	33320906	33321110
13	33438481	33438683
13	35401816	35402029
13	35975092	35975301
13	35975360	35975572
13	38708103	38708322
13	40210299	40210644
13	42884735	42884933
13	43728788	43728986
13	50142204	50142439
13	50581489	50581741
13	54157712	54157958
13	54266056	54266392
13	54904307	54904506
13	61730495	61730779
13	63497247	63497682
13	64066493	64066751
13	65502273	65502519
13	68477857	68478182
13	68546589	68546806
13	71446646	71446844
13	76281957	76282169
13	77750684	77750923
13	80144042	80144240
13	82265972	82266221
13	84635292	84635490
13	88300404	88300639
13	91347127	91347337
13	93306752	93306982
13	109075657	109075855
13	110306834	110307032
13	111417223	111417462
13	113576860	113577058
13	114023536	114023817
13	129784433	129784740
13	133877444	133877644
13	136678066	136678265
13	137918226	137918515
13	140018834	140019058
13	144179232	144179525
13	144272238	144272436
13	144647496	144647697
13	146379144	146379344
13	146870023	146870236
13	147512627	147512858
13	154031112	154031335
13	189295589	189295818
13	196012246	196012472
13	197081166	197081386
13	197168538	197168829
13	197245025	197245257
13	197264155	197264353
13	198145651	198145865
13	202895514	202895712
13	203364097	203364295
13	204988064	204988404
13	205181377	205181578
14	2602996	2603279
14	2938896	2939103
14	3455301	3455499
14	5935315	5935844
14	7137258	7137456
14	7342814	7343087
14	7344252	7344481
14	7358552	7358773
14	7390333	7390531
14	7499050	7499281
14	8996354	8996590
14	10050113	10050370
14	10055214	10055412
14	12197574	12197842
14	13739981	13740194
14	14041429	14041677
14	17817766	17817964
14	21775668	21775878
14	21800678	21801143
14	21808411	21808750
14	21867287	21867485
14	23331608	23331833
14	24098823	24099022
14	24921581	24921836
14	25502447	25502757
14	25717483	25717681
14	28015958	28016157
14	28806372	28806588
14	29187548	29187746
14	32320073	32320288
14	32627820	32628055
14	34148755	34148991
14	35336488	35336686
14	37806282	37806480
14	38108227	38108425
14	40109043	40109323
14	49304926	49305124
14	50326238	50326440
14	50929917	50930116
14	51666207	51666626
14	51705705	51705954
14	54193818	54194200
14	54281543	54281990
14	57599884	57600082
14	58252723	58252921
14	59409234	59409432
14	59479388	59479675
14	60334525	60334723
14	60405513	60405759
14	60720241	60720451
14	62567261	62567460
14	62748354	62748552
14	72210617	72210958
14	72938189	72938416
14	73220125	73220323
14	74781143	74781356
14	74815537	74815735
14	79464699	79464924
14	79864167	79864428
14	81059161	81059359
14	81283132	81283355
14	82092156	82092354
14	86766696	86766910
14	86951857	86952133
14	87074708	87074986
14	88432784	88433054
14	89620930	89621563
14	90432047	90432253
14	93235011	93235209
14	99540234	99540432
14	100835451	100835736
14	101165653	101165986
14	103831655	103831895
14	105196166	105196367
14	107127843	107128041
14	107449503	107449761
14	109212523	109212747
14	110032031	110032362
14	112472320	112472518
14	120590338	120590585
14	125571469	125571730
14	126473798	126473996
14	128879862	128880060
14	131988393	131988591
14	132091018	132091218
14	133275725	133275934
14	134480825	134481023
14	139834261	139834693
15	347328	347526
15	1716774	1716972
15	3525551	3525763
15	7466189	7466478
15	8105487	8105685
15	11112369	11112567
15	12980800	12981051
15	16125169	16125419
15	16152066	16152276
15	17751937	17752163
15	18500677	18500915
15	19431045	19431243
15	19640480	19640684
15	21000714	21000942
15	23542060	23542321
15	27155433	27155882
15	27541358	27541556
15	27622374	27622572
15	30731725	30731934
15	31946464	31946666
15	32541146	32541345
15	32561645	32561858
15	32663273	32663580
15	32745266	32745550
15	32780995	32781299
15	33292579	33292809
15	33407682	33407952
15	33577508	33577710
15	34365163	34365361
15	34804773	34805194
15	34960040	34960262
15	37815210	37815421
15	39713094	39713296
15	44491679	44491877
15	44886731	44886979
15	47093993	47094202
15	47664821	47665026
15	48830321	48830547
15	57041762	57041975
15	57183092	57183290
15	65280341	65280548
15	65647701	65647899
15	67971196	67971401
15	72512197	72512395
15	75202095	75202294
15	76135498	76135761
15	78853202	78853400
15	78872939	78873176
15	83008878	83009136
15	83519838	83520600
15	83538089	83538398
15	88376655	88376853
15	89947151	89947365
15	94899100	94899355
15	95048499	95048768
15	95899560	95899758
15	103494268	103494466
15	105140751	105141016
15	105768941	105769157
15	119819335	119819551
15	123500593	123500791
15	124116292	124116490
15	124741885	124742241
15	125812951	125813149
15	130711263	130711461
15	130724731	130724932
15	132266514	132266737
15	132892324	132892522
15	133268311	133268550
15	133722957	133723155
15	134849501	134849701
15	135523491	135523819
15	135606917	135607154
15	135811410	135811615
16	788477	788675
16	1036910	1037108
16	3598596	3598811
16	3802437	3802758
16	4994662	4994896
16	19556272	19556559
16	20313571	20313772
16	23679219	23680677
16	23681138	23681434
16	23681854	23682274
16	23682496	23683062
16	23683619	23683903
16	23900636	23900834
16	24123705	24123903
16	27814333	27814531
16	27956871	27957069
16	34702355	34702638
16	37934918	37935188
16	38133337	38133535
16	39890398	39890701
16	43539247	43539531
16	50099406	50099633
16	50571385	50571583
16	51304210	51304408
16	51345814	51346203
16	51792353	51792588
16	53615170	53615490
16	64663139	64663396
16	71297480	71297680
16	71501384	71501707
16	71648974	71649172
16	72830649	72830917
16	76348496	76348789
17	531075	531390
17	1215237	1215558
17	10177681	10177904
17	12719361	12719559
17	12805629	12805844
17	13159022	13159275
17	14221111	14221309
17	14919682	14919890
17	17972906	17973250
17	21838729	21838976
17	22357122	22357320
17	23386669	23386867
17	24042705	24042909
17	26167492	26167722
17	26850118	26850420
17	27274668	27274874
17	28487393	28487656
17	28667363	28667561
17	31078620	31078861
17	31145564	31145821
17	37202616	37202852
17	40979209	40979407
17	45599431	45599629
17	46202634	46202832
17	46238340	46238538
17	46745580	46745951
17	47387979	47388187
17	49268516	49268743
17	49731100	49731483
17	51181031	51181236
17	52195206	52195404
17	52377509	52377779
17	54923533	54923897
17	54960191	54960389
17	59174279	59174662
17	59360138	59360367
17	62006154	62006549
17	62172093	62172291
18	801956	802154
18	863482	863695
18	1363225	1363479
18	2738510	2738717
18	6664996	6665194
18	7361898	7362149
18	7628621	7628878
18	8255234	8255539
18	16312692	16312890
18	16475800	16475998
18	16699084	16699282
18	18067222	18067689
18	23389343	23389682
18	34341505	34341703
18	38050651	38050849
18	40172161	40172438
18	41126709	41126907
18	43907858	43908067
18	48693895	48694108
18	48978236	48978455
18	50074107	50074305
18	50922932	50923173
18	50958605	50958864
18	55407635	55407866
X	133837	134090
X	2811949	2812147
X	2812226	2812433
X	12224272	12224602
X	14058463	14058661
X	15773020	15773288
X	16176014	16176212
X	19912911	19913143
X	20222026	20222254
X	20928030	20928228
X	28875284	28876068
X	31903196	31903394
X	33189788	33189986
X	34952669	34952941
X	42313988	42314186
X	43613776	43613974
X	46094345	46094663
X	47770476	47770674
X	50878079	50878277
X	53990045	53990243
X	56548887	56549157
X	57927831	57928029
X	60538121	60538373
X	67079764	67080037
X	68302385	68302651
X	68958911	68959129
X	69137761	69137990
X	82558204	82558526
X	86618558	86618847
X	88614249	88614715
X	88777389	88777587
X	92586358	92586734
X	94268716	94268979
X	94991751	94991988
X	100950450	100950648
X	107230822	107231071
X	118159939	118160200
X	123058160	123058381
X	125881767	125882178

## Sheet: Intergenic DHSs in VAT
Chromosome	Start site	End site
1	3689809	3690081
1	4350691	4350924
1	10898664	10898862
1	15107162	15107360
1	16501529	16501779
1	17734256	17734460
1	17850473	17850671
1	20211238	20211542
1	24215688	24215917
1	26340730	26340962
1	33444604	33444827
1	40341147	40341345
1	40341399	40341635
1	42141907	42142165
1	42192580	42192778
1	43625827	43626025
1	51232283	51232481
1	54376709	54376924
1	58743709	58743999
1	60328941	60329179
1	63361666	63361929
1	63787642	63787850
1	64665686	64665917
1	69007343	69007673
1	69790175	69790373
1	70188393	70188591
1	71481806	71482004
1	72947279	72947518
1	79755614	79755823
1	81227842	81228040
1	84077026	84077231
1	85254826	85255031
1	85341276	85341578
1	85550041	85550320
1	86708329	86708527
1	88574557	88574939
1	91841936	91842145
1	92603672	92603986
1	92838594	92838819
1	92840482	92840726
1	92935205	92935403
1	93832641	93832839
1	97040828	97041142
1	98592539	98592755
1	104671820	104672043
1	105958849	105959068
1	107038611	107038809
1	114195492	114195690
1	118402091	118402300
1	118736381	118736581
1	123365217	123365415
1	129740819	129741017
1	136039513	136039731
1	137163727	137163932
1	140914356	140914554
1	142194323	142194530
1	145399492	145399731
1	146375286	146375488
1	146412429	146412757
1	146829448	146829655
1	146836212	146836693
1	146863287	146863632
1	146912679	146912877
1	149960627	149960825
1	151184056	151184254
1	156928265	156928522
1	164930832	164931092
1	169623894	169624182
1	170761366	170761633
1	174740246	174740484
1	174773999	174774203
1	177983690	177983888
1	177984135	177984445
1	181044849	181045229
1	188167812	188168010
1	190527038	190527266
1	191350100	191350430
1	192441408	192441984
1	196518363	196518610
1	197227073	197227412
1	211177340	211177538
1	212621881	212622090
1	220238349	220238547
1	227406587	227407006
1	231988651	231988933
1	243532979	243533337
1	245037358	245037568
1	247706716	247706946
1	248904240	248904527
1	253623863	253624061
1	254249758	254250009
1	256131297	256131848
1	259076648	259076846
1	259270802	259271000
1	260347652	260347870
1	263548076	263548300
1	271638637	271638852
1	271986118	271986375
2	2318196	2318452
2	3664045	3664530
2	7454930	7455213
2	17969787	17970009
2	20274530	20274728
2	21079991	21080189
2	23060925	23061151
2	23708217	23708458
2	24408398	24408600
2	31118686	31118885
2	32434081	32434309
2	34707852	34708058
2	37713267	37713516
2	43229891	43230089
2	43824432	43824630
2	50614823	50615049
2	50623995	50624195
2	50672372	50672675
2	51036500	51036793
2	51603482	51603787
2	56219830	56220118
2	58165991	58166293
2	70671586	70671875
2	73701781	73701979
2	89944581	89944819
2	93659824	93660098
2	107262506	107262740
2	111369346	111369580
2	111370219	111370444
2	111560579	111560814
2	119275838	119276036
2	120982736	120982989
2	125964623	125965002
2	126013031	126013242
2	137241734	137241951
2	142717236	142717434
2	145629138	145629361
3	2791334	2791540
3	5630857	5631150
3	8798431	8798698
3	8843890	8844088
3	15005842	15006040
3	16205441	16205760
3	19993245	19993443
3	20107102	20107328
3	20315419	20315653
3	21330310	21330564
3	25656245	25656461
3	25847589	25848188
3	26794691	26794994
3	33417962	33418204
3	34401006	34401225
3	34662148	34662367
3	34775051	34775249
3	41630311	41630531
3	57037326	57037524
3	57062341	57062539
3	60967237	60967460
3	65204114	65204372
3	69602948	69603351
3	70670541	70670847
3	78081456	78081677
3	79306475	79306680
3	80950112	80950333
3	83219487	83219685
3	86110805	86111003
3	97807320	97807542
3	99408367	99408565
3	105084265	105084573
3	107926574	107926779
3	116140322	116140572
3	120417257	120417491
3	121365204	121365402
3	122633329	122633527
3	125216824	125217022
3	126004580	126004791
3	126256752	126256962
3	129573424	129573725
3	130720611	130720820
3	131718396	131718788
3	132840425	132840623
4	4665257	4665493
4	14203891	14204159
4	19447097	19447296
4	32609618	32609885
4	34319372	34319592
4	41177504	41177721
4	41216038	41216289
4	45022660	45022902
4	45183194	45183392
4	45324014	45324215
4	46447197	46448128
4	46452886	46453526
4	46468841	46469042
4	46499177	46499375
4	46627724	46627922
4	54591363	54591638
4	60091288	60091576
4	60718870	60719093
4	63616142	63616354
4	64339886	64340084
4	69420886	69421084
4	78186058	78186256
4	78330730	78330928
4	80750878	80751141
4	84313732	84314060
4	84759059	84759271
4	89040240	89040452
4	90461698	90461896
4	97081198	97081401
4	99225339	99225633
4	119408471	119408669
4	120750093	120750305
4	120860737	120861009
4	121380803	121381037
4	121598554	121598771
4	122130876	122131090
4	122784850	122785048
5	2233616	2233835
5	26867590	26867808
5	37782873	37783097
5	39802830	39803045
5	39811786	39812493
5	39886569	39886824
5	39888164	39888423
5	39894988	39895224
5	39901898	39902110
5	39904925	39905262
5	39907687	39907896
5	39908518	39909044
5	39909733	39909938
5	39911490	39911692
5	39913137	39913483
5	39929634	39929914
5	39936297	39936500
5	39996719	39996974
5	39998748	39999065
5	40007547	40007907
5	40035706	40035904
5	40080992	40081193
5	40083813	40084119
5	40094951	40095149
5	40175239	40175449
5	40190826	40191108
5	40195776	40196561
5	40197128	40197810
5	40198050	40198271
5	40225030	40225328
5	40841830	40842086
5	41062135	41062333
5	41134774	41134976
5	41135252	41135488
5	45084549	45084760
5	51191086	51191294
5	55780799	55780997
5	58223628	58223848
5	72041275	72041505
5	73116357	73116555
5	74724809	74725033
5	78328314	78328514
5	78328760	78329024
5	81502251	81502449
5	91541090	91541313
5	94943579	94943777
5	95240926	95241128
6	30840	31104
6	33997	34241
6	38797	39033
6	19264615	19264823
6	22636443	22636662
6	33942097	33942295
6	38588684	38588898
6	38743870	38744078
6	38744694	38744913
6	38757672	38757908
6	38758720	38759060
6	38774519	38774794
6	38780960	38781429
6	38837374	38837601
6	38952295	38952493
6	38990679	38990891
6	41517789	41518100
6	41932049	41932247
6	42497451	42497656
6	44192596	44192794
6	56745994	56746222
6	56750654	56750868
6	59725736	59726008
6	63237796	63238168
6	65671831	65672043
6	65680715	65681021
6	66564182	66564380
6	66703025	66703223
6	66717363	66717735
6	68906985	68907183
6	74971107	74971374
6	83983130	83983535
6	86671663	86671881
6	90710775	90710995
6	90718067	90718362
6	91876966	91877164
6	100935821	100936070
6	101955832	101956103
6	102038873	102039140
6	105125623	105125821
6	110472177	110472399
6	114247605	114247824
6	122339324	122339522
6	123780112	123780399
6	126224489	126224687
6	126703028	126703752
6	127735476	127735685
6	130696171	130696460
6	133029956	133030160
6	136042061	136042259
6	139159836	139160231
6	161077293	161077491
7	2224241	2224439
7	5457135	5457333
7	11810583	11810781
7	15254571	15254772
7	15302126	15302357
7	27958995	27959410
7	34403501	34403717
7	35436697	35436895
7	36296697	36296957
7	36306354	36306552
7	40626278	40626476
7	43943322	43943534
7	47089303	47089502
7	47089622	47089856
7	47091891	47092132
7	49158429	49158627
7	49942673	49943155
7	54412999	54413232
7	57151067	57151324
7	60332652	60332853
7	73258513	73258717
7	74140825	74141023
7	74564783	74564981
7	78729260	78729794
7	79561480	79561694
7	83446726	83447384
7	85267475	85267715
7	108228397	108228617
7	109798706	109798904
7	117210467	117210665
7	117862569	117862839
7	118665225	118665508
8	2405399	2405626
8	4191409	4191617
8	12106202	12106406
8	13047008	13047282
8	17580104	17580371
8	19413366	19413594
8	26483686	26483884
8	26535618	26535816
8	28716913	28717112
8	37975229	37975427
8	39077063	39077261
8	46620921	46621119
8	46817611	46817862
8	50152627	50152834
8	53116596	53116834
8	53280114	53280364
8	54371981	54372179
8	54379488	54379686
8	54589127	54589683
8	54590377	54590575
8	55931244	55931442
8	56382055	56382253
8	56608008	56608256
8	57998897	57999124
8	58160488	58160686
8	58816264	58816519
8	60006754	60007133
8	63674376	63674574
8	63711929	63712127
8	72504526	72504828
8	73137437	73137738
8	73137910	73138176
8	75402377	75402616
8	79863164	79863362
8	80092024	80092329
8	80115231	80115488
8	80229478	80229711
8	84744077	84744275
8	88027595	88027847
8	94479006	94479230
8	94642798	94642996
8	98719851	98720049
8	100021178	100021376
8	100387438	100387719
8	115302471	115302669
8	116341391	116341605
8	118689405	118689610
8	119798521	119798719
8	122811879	122812083
8	129214928	129215126
8	129568618	129568876
8	138514176	138514382
8	138950124	138950391
9	3181433	3181631
9	11676761	11676976
9	21241106	21241309
9	30525859	30526057
9	37591623	37591854
9	42335232	42335613
9	43617514	43617712
9	48700174	48700396
9	48777611	48777844
9	52302656	52302947
9	57393722	57393920
9	61272371	61272700
9	62809584	62810039
9	62819741	62819939
9	63057715	63057951
9	63145456	63145657
9	63147516	63147720
9	63231747	63231945
9	63233931	63234340
9	63304698	63304958
9	63305148	63305555
9	63362578	63362981
9	63363095	63363374
9	63363656	63363889
9	63377146	63377664
9	63378729	63378942
9	63389884	63390123
9	63391634	63391864
9	63394332	63394805
9	63396567	63396771
9	63412376	63412621
9	63423541	63424245
9	63424706	63424922
9	63428528	63428853
9	63431989	63432192
9	63473259	63473471
9	63473855	63474126
9	63475436	63475641
9	63479799	63480037
9	69847412	69847612
9	76510907	76511105
9	76674364	76674562
9	82694275	82694499
9	91643694	91643908
9	92934917	92935184
9	97758200	97758414
9	100496032	100496439
9	100615869	100616085
9	106436699	106436913
9	106448604	106448817
9	107819743	107819998
9	109582141	109582361
9	111874453	111874669
9	112471028	112471246
9	119696842	119697060
9	121708786	121708984
9	122870941	122871200
9	135884786	135884988
9	135941651	135941942
9	137619765	137619963
9	139498786	139499015
9	139506034	139506277
9	139507401	139507640
10	264908	265190
10	1766394	1766624
10	5098204	5098435
10	5684954	5685168
10	9214455	9214753
10	10737008	10737206
10	10812347	10812545
10	12401992	12402218
10	17683992	17684261
10	19282387	19282641
10	19285228	19285797
10	19286278	19286843
10	20967143	20967367
10	21181592	21181817
10	21435253	21435451
10	23087561	23087760
10	25083194	25083456
10	26428701	26428899
10	28783144	28783658
10	35076040	35076266
10	40154032	40154598
10	44367974	44368172
10	48667590	48667800
10	62720626	62721284
10	66978154	66978370
11	2096493	2096709
11	2651520	2651725
11	26385199	26385618
11	27363244	27363473
11	27558723	27558921
11	35640890	35641096
11	35746218	35746489
11	35805319	35805584
11	35870791	35871613
11	41327668	41327899
11	50883526	50883901
11	51289962	51290230
11	53310410	53310608
11	59886323	59886553
11	66772899	66773097
11	72966688	72966970
11	73534297	73534747
11	73604331	73604650
11	76751823	76752207
11	78118178	78118433
12	6662508	6662706
12	7264316	7264645
12	7491710	7491908
12	9133988	9134186
12	9192939	9193172
12	9478188	9478547
12	9562885	9563130
12	12219328	12219526
12	25346061	25346261
12	30117995	30118213
12	30290369	30290645
12	30291075	30291293
12	33376043	33376241
12	50992954	50993152
12	51312392	51312599
12	55341343	55341552
12	57402408	57402639
12	57791166	57791404
12	58676962	58677232
12	61597855	61598548
13	13721	13962
13	15288	15551
13	23275	23527
13	23637	23837
13	35603	35819
13	42285	42558
13	43971	44171
13	44912	45124
13	55464	55735
13	60888	61131
13	126872	127200
13	137681	137926
13	139632	139872
13	140832	141247
13	1709131	1709329
13	4858751	4858949
13	5550943	5551159
13	7537810	7538025
13	7650180	7650378
13	10454811	10455025
13	13697791	13698006
13	14656241	14656520
13	15288904	15289149
13	17124880	17125079
13	17497110	17497352
13	24874065	24874286
13	26385591	26385867
13	29211028	29211235
13	31015390	31015609
13	37153861	37154121
13	46482553	46482751
13	53700330	53700758
13	55240529	55240738
13	57037414	57037612
13	62161339	62161537
13	62351586	62351895
13	62784830	62785028
13	63031404	63031728
13	74731172	74731370
13	78180434	78180632
13	85359963	85360214
13	85549734	85550005
13	90214530	90214728
13	93155984	93156211
13	98738661	98738859
13	101097632	101097830
13	124880237	124880533
13	125265175	125265496
13	131307608	131307835
13	134146252	134146490
13	143279607	143279805
13	148366059	148366270
13	149624387	149624613
13	153749797	153750006
13	167754642	167754840
13	173280615	173280813
13	174952869	174953116
13	177206533	177206771
13	180966684	180966921
13	183860977	183861202
13	184452819	184453035
13	184496348	184496550
13	188312142	188312403
13	191741115	191741314
13	194335562	194335854
13	194336808	194337068
13	194337954	194338152
13	196724887	196725181
13	198355201	198355540
13	204711843	204712041
14	4662166	4662390
14	10866792	10867036
14	19373362	19373560
14	20611390	20611598
14	23752129	23752362
14	23760857	23761080
14	23808571	23808820
14	24813649	24813970
14	25017586	25017856
14	26788175	26788373
14	26815834	26816099
14	38059646	38059904
14	42041407	42041642
14	53231716	53231927
14	61233513	61233711
14	62977827	62978082
14	65072054	65072255
14	65335200	65335408
14	67159707	67159962
14	84860811	84861010
14	87272817	87273015
14	87467992	87468190
14	90325573	90325771
14	92502868	92503175
14	92637439	92637637
14	102392988	102393507
14	104232327	104232632
14	109644975	109645173
14	124737679	124737877
14	128149448	128149792
14	130128521	130128761
14	134935166	134935432
14	136923766	136924012
14	138069456	138069654
14	138392554	138392752
14	140245069	140245338
14	141576047	141576390
14	141577166	141577442
15	992	1281
15	2775	3138
15	4002	4215
15	4397	4739
15	13043	13244
15	54701	54950
15	1129351	1129549
15	11790670	11790915
15	12138621	12138819
15	15325300	15325526
15	15986701	15987043
15	17955523	17955762
15	18333034	18333247
15	20329139	20329462
15	22475546	22475766
15	23826383	23826586
15	25754611	25755044
15	28651084	28651316
15	28768624	28769065
15	29239588	29239966
15	29540393	29540591
15	32514101	32514299
15	33455674	33455872
15	35400486	35400697
15	36129417	36129730
15	36886318	36886563
15	37690911	37691252
15	42591105	42591311
15	43164320	43164603
15	43203096	43203294
15	43629516	43629714
15	45691536	45691834
15	49170167	49170365
15	49764362	49764594
15	56314295	56314661
15	57735742	57735960
15	58021543	58021776
15	78258072	78258381
15	90309819	90310017
15	90706812	90707010
15	90905226	90905440
15	91274287	91274485
15	92596370	92596568
15	98058843	98059041
15	109101575	109101838
15	109635546	109635744
15	115217458	115217947
15	116999774	117000063
15	118040962	118041195
15	119247917	119248125
15	126762111	126762416
15	126762523	126762767
15	132209654	132209865
15	134495534	134495780
15	135130855	135131177
15	138309784	138310069
15	138657557	138657917
15	138793355	138793571
16	3588	3843
16	8238	8633
16	8708	9827
16	17558	18009
16	116465	116663
16	9096060	9096258
16	11674446	11674730
16	15552877	15553075
16	15594398	15594609
16	18682018	18682224
16	18697580	18697778
16	41584009	41584207
16	46266138	46266404
16	50887408	50887685
16	52656589	52656873
16	52662259	52662457
16	57321685	57322082
16	66384780	66385022
16	70041580	70041879
16	70154345	70154546
16	72429948	72430146
16	77296976	77297310
16	77927198	77927398
16	78268695	78268974
17	10335167	10335374
17	10400245	10400444
17	12317679	12317946
17	13404519	13404855
17	13561958	13562317
17	13577595	13577913
17	14369213	14369537
17	19988853	19989097
17	20898439	20898676
17	21404067	21404289
17	21472988	21473267
17	25547047	25547256
17	30210808	30211006
17	34413221	34413419
17	50018523	50018752
17	50105154	50105412
17	50312815	50313038
17	55217391	55217680
17	55682918	55683236
17	59601246	59601500
17	60015734	60016005
17	60108010	60108208
17	63355011	63355233
17	63385363	63386352
17	63386551	63386786
17	63386875	63387330
17	63387448	63387784
17	63408937	63409135
17	63409738	63409936
17	63416544	63416747
17	63433529	63433752
17	63433942	63434204
17	63435475	63435727
17	63447460	63447687
17	63449576	63449835
17	63450018	63450272
17	63455024	63455242
17	63467474	63467748
17	63469042	63469293
18	2092596	2092940
18	2595463	2595661
18	2871759	2871988
18	3946843	3947041
18	4341877	4342098
18	4969208	4969472
18	10854758	10854962
18	30898440	30898672
18	35967009	35967237
18	37247417	37247621
18	45975087	45975295
18	47186064	47186272
18	47267406	47267604
18	50293994	50294204
18	50487394	50487623
X	19598317	19598600
X	21546779	21546977
X	21741970	21742168
X	22616098	22616322
X	32925369	32925627
X	40522607	40522805
X	40745377	40745789
X	42629262	42629481
X	44723249	44723546
X	47987437	47987719
X	49047056	49047254
X	51796248	51796621
X	52032842	52033040
X	55464942	55465140
X	57689158	57689393
X	65521461	65521681
X	66128498	66128696
X	66188773	66188991
X	71332519	71332810
X	78216124	78216322
X	82246742	82246958
X	85278591	85278817
X	98880147	98880345
X	100278349	100278631
X	102752484	102752682
X	103642184	103642382
X	105163015	105163213
X	106224519	106224768
X	108485159	108485423
X	112533109	112533336
X	113347322	113347667
X	114037759	114037957
X	114723168	114723386
X	116222285	116222496
X	117388007	117388232
X	117818552	117818750
X	119907831	119908035
X	121970124	121970406
