# Supplementary material for: Chromatin accessibility landscape of stromal subpopulations reveals distinct metabolic and inflammatory features of porcine subcutaneous and visceral adipose tissue
Source: PeerJ. 2022 May 24;10:e13250. doi: 10.7717/peerj.13250 (PMC9138157; doi:10.7717/peerj.13250)
Supplement: Supplemental Information 3 [file peerj-10-13250-s003.xlsx]

## Sheet: Differential DHSs
Chromosome	Start site	End site	P-value	Annotation	Nearest PromoterID	Distance to Nearest TSS
13	51372634	51373098	1.62e-14	intron (ENSSSCT00000031407, intron 2 of 8)	ENSSSCT00000012600	-12650
17	63385356	63386352	1.56e-08	Intergenic	ENSSSCT00000037320	-23865
16	23681853	23682274	2.07e-08	intron (ENSSSCT00000062781, intron 14 of 28)	ENSSSCT00000060018	61651
1	188582277	188582661	1.54e-06	promoter-TSS (ENSSSCT00000047398)	ENSSSCT00000047398	-35
7	112753175	112753699	1.76e-06	promoter-TSS (ENSSSCT00000043476)	ENSSSCT00000002707	180
9	139507400	139507640	3.65e-06	Intergenic	ENSSSCT00000087700	90548
16	23679161	23680760	4.14e-06	intron (ENSSSCT00000062781, intron 14 of 28)	ENSSSCT00000060018	63754
10	24959675	24959981	4.47e-06	exon (ENSSSCT00000076984, exon 2 of 2)	ENSSSCT00000079233	8444
12	202112	202528	5.7e-06	intron (ENSSSCT00000067704, intron 1 of 2)	ENSSSCT00000067704	121
13	53700329	53700758	5.7e-06	Intergenic	ENSSSCT00000068788	-28105
12	11966495	11967063	8.57e-06	promoter-TSS (ENSSSCT00000057079)	ENSSSCT00000060456	-169
18	43727879	43728232	8.57e-06	exon (ENSSSCT00000018170, exon 2 of 2)	ENSSSCT00000018170	2111
6	94891150	94891489	8.86e-06	promoter-TSS (ENSSSCT00000004048)	ENSSSCT00000004048	-43
3	42757172	42757466	8.97e-06	intron (ENSSSCT00000062625, intron 5 of 27)	ENSSSCT00000062625	46087
7	24613426	24614110	1.24e-05	intron (ENSSSCT00000007742, intron 3 of 10)	ENSSSCT00000040613	16898
17	40979208	40979407	1.28e-05	intron (ENSSSCT00000069867, intron 2 of 4)	ENSSSCT00000069867	513
6	101757449	101757677	1.28e-05	promoter-TSS (ENSSSCT00000065368)	ENSSSCT00000065368	-450
X	88614248	88614715	1.36e-05	intron (ENSSSCT00000033275, intron 6 of 13)	ENSSSCT00000033275	65704
1	274070903	274071297	1.42e-05	intron (ENSSSCT00000006323, intron 62 of 64)	ENSSSCT00000032543	-32777
1	161587751	161588297	1.58e-05	exon (ENSSSCT00000076740, exon 2 of 2)	ENSSSCT00000089799	-2287
12	7401233	7401432	1.7e-05	Intergenic	ENSSSCT00000070730	-174312
9	9737388	9737587	1.7e-05	exon (ENSSSCT00000057302, exon 2 of 19)	ENSSSCT00000037268	511
9	118114200	118114670	1.79e-05	promoter-TSS (ENSSSCT00000075466)	ENSSSCT00000016896	-176
4	76587168	76587397	2.12e-05	intron (ENSSSCT00000087055, intron 1 of 4)	ENSSSCT00000087055	2446
2	24602569	24603098	2.17e-05	promoter-TSS (ENSSSCT00000086377)	ENSSSCT00000038108	16
17	20898438	20898676	2.38e-05	Intergenic	ENSSSCT00000056940	53737
2	90233347	90233571	2.38e-05	intron (ENSSSCT00000062752, intron 1 of 17)	ENSSSCT00000039349	29575
6	44056775	44057080	2.66e-05	intron (ENSSSCT00000003175, intron 22 of 30)	ENSSSCT00000067167	-17198
3	37555118	37555762	3.02e-05	promoter-TSS (ENSSSCT00000072932)	ENSSSCT00000072932	12
10	17471364	17471774	3.12e-05	promoter-TSS (ENSSSCT00000058659)	ENSSSCT00000058659	-339
3	131236958	131237858	3.36e-05	intron (ENSSSCT00000024273, intron 3 of 6)	ENSSSCT00000060248	17143
7	36386150	36387149	3.66e-05	promoter-TSS (ENSSSCT00000043871)	ENSSSCT00000043871	-70
14	87074707	87074986	3.82e-05	intron (ENSSSCT00000011333, intron 3 of 15)	ENSSSCT00000011333	152548
3	45916878	45917116	3.82e-05	exon (ENSSSCT00000070035, exon 4 of 9)	ENSSSCT00000070035	22910
13	14300989	14301298	3.89e-05	intron (ENSSSCT00000077285, intron 2 of 3)	ENSSSCT00000076308	25786
10	65109099	65109388	4.24e-05	promoter-TSS (ENSSSCT00000054369)	ENSSSCT00000029024	157
13	124390730	124391011	4.24e-05	promoter-TSS (ENSSSCT00000012909)	ENSSSCT00000012910	-100
7	100392035	100392310	4.24e-05	promoter-TSS (ENSSSCT00000036355)	ENSSSCT00000065293	-39
6	84879727	84880181	4.35e-05	promoter-TSS (ENSSSCT00000052271)	ENSSSCT00000052271	-81
1	128489407	128489951	4.39e-05	promoter-TSS (ENSSSCT00000066619)	ENSSSCT00000066619	-8
3	129136183	129136452	4.42e-05	intron (ENSSSCT00000069946, intron 1 of 2)	ENSSSCT00000077486	-1640
5	79361304	79361561	4.42e-05	intron (ENSSSCT00000091562, intron 1 of 8)	ENSSSCT00000069223	-2196
7	99491196	99491395	4.42e-05	intron (ENSSSCT00000059372, intron 2 of 3)	ENSSSCT00000059372	3111
9	135941650	135941942	4.42e-05	Intergenic	ENSSSCT00000078136	-33897
15	108977537	108978202	4.69e-05	intron (ENSSSCT00000046744, intron 1 of 15)	ENSSSCT00000066403	3050
1	238804382	238804587	5.28e-05	intron (ENSSSCT00000005898, intron 1 of 5)	ENSSSCT00000005898	21945
2	81613268	81613581	5.28e-05	promoter-TSS (ENSSSCT00000083747)	ENSSSCT00000088552	133
13	203779329	203779659	5.42e-05	intron (ENSSSCT00000013204, intron 12 of 34)	ENSSSCT00000057653	-175648
3	114722614	114722958	5.42e-05	exon (ENSSSCT00000066132, exon 1 of 29)	ENSSSCT00000066132	465
14	103278029	103278228	5.73e-05	exon (ENSSSCT00000011452, exon 1 of 2)	ENSSSCT00000011452	635
16	53692371	53692573	5.73e-05	exon (ENSSSCT00000067845, exon 2 of 2)	ENSSSCT00000080571	2375
17	57499536	57499743	5.73e-05	Intergenic	ENSSSCT00000008210	19235
3	24814996	24815292	5.73e-05	promoter-TSS (ENSSSCT00000071244)	ENSSSCT00000071244	-118
14	41757171	41757500	6.33e-05	exon (ENSSSCT00000010890, exon 1 of 7)	ENSSSCT00000063148	472
15	95140149	95140604	6.33e-05	exon (ENSSSCT00000017478, exon 1 of 12)	ENSSSCT00000017478	103
6	54564387	54564717	6.33e-05	intron (ENSSSCT00000046266, intron 24 of 31)	ENSSSCT00000021469	-1902
17	31942783	31943151	6.57e-05	intron (ENSSSCT00000007822, intron 6 of 10)	ENSSSCT00000055558	-7300
10	34001662	34002088	6.94e-05	promoter-TSS (ENSSSCT00000023699)	ENSSSCT00000050582	-1
10	59816819	59817216	6.94e-05	promoter-TSS (ENSSSCT00000052360)	ENSSSCT00000059757	-3
12	47785027	47785355	6.94e-05	exon (ENSSSCT00000083100, exon 1 of 12)	ENSSSCT00000083100	185
3	41571676	41571926	6.94e-05	promoter-TSS (ENSSSCT00000008725)	ENSSSCT00000008725	-167
1	248904239	248904527	7.02e-05	Intergenic	ENSSSCT00000088376	-125407
15	21000713	21000942	7.16e-05	intron (ENSSSCT00000017111, intron 1 of 26)	ENSSSCT00000085990	48149
16	50571384	50571583	7.16e-05	TTS (ENSSSCT00000076140)	ENSSSCT00000076140	10512
6	38990678	38990891	7.16e-05	Intergenic	ENSSSCT00000047125	78366
2	52210537	52211163	7.21e-05	intron (ENSSSCT00000058102, intron 1 of 3)	ENSSSCT00000058102	248
3	114722060	114722436	7.26e-05	promoter-TSS (ENSSSCT00000066132)	ENSSSCT00000066132	-73
4	78098827	78099137	7.51e-05	promoter-TSS (ENSSSCT00000054128)	ENSSSCT00000047670	-17
7	27209499	27209851	7.51e-05	exon (ENSSSCT00000001660, exon 1 of 17)	ENSSSCT00000054492	111
15	120472588	120472787	7.63e-05	intron (ENSSSCT00000081453, intron 4 of 19)	ENSSSCT00000017637	9121
7	41469185	41469459	7.63e-05	exon (ENSSSCT00000025267, exon 1 of 5)	ENSSSCT00000025267	542
7	83446725	83447384	7.85e-05	Intergenic	ENSSSCT00000080304	145457
3	39776488	39776880	7.94e-05	promoter-TSS (ENSSSCT00000060151)	ENSSSCT00000060151	-155
15	130711262	130711461	8.24e-05	intron (ENSSSCT00000017703, intron 1 of 12)	ENSSSCT00000017703	42690
X	58646789	58647087	8.24e-05	Intergenic	ENSSSCT00000079338	-8214
7	104282988	104283517	8.57e-05	promoter-TSS (ENSSSCT00000049435)	ENSSSCT00000085937	-8
3	126256751	126256962	9.42e-05	Intergenic	ENSSSCT00000035469	-36547
6	83687698	83687948	9.42e-05	exon (ENSSSCT00000061813, exon 15 of 15)	ENSSSCT00000050998	219
15	46503133	46503452	9.55e-05	intron (ENSSSCT00000025197, intron 10 of 15)	ENSSSCT00000017197	32528
17	54631615	54632052	9.55e-05	promoter-TSS (ENSSSCT00000035317)	ENSSSCT00000035317	-576
8	56386069	56386302	9.55e-05	Intergenic	ENSSSCT00000081011	20785
3	96317152	96317556	0.000103252	promoter-TSS (ENSSSCT00000072554)	ENSSSCT00000072554	-107
1	230872414	230872648	0.000105449	intron (ENSSSCT00000057300, intron 2 of 7)	ENSSSCT00000057300	35144
2	31999142	31999397	0.000105449	Intergenic	ENSSSCT00000090256	-23755
4	42162327	42162709	0.000107664	promoter-TSS (ENSSSCT00000045445)	ENSSSCT00000075700	87
8	77433579	77433997	0.00011175	intron (ENSSSCT00000025424, intron 2 of 10)	ENSSSCT00000081057	-16649
14	74217035	74217395	0.000112	Intergenic	ENSSSCT00000079724	-5443
1	57127990	57128354	0.000115657	promoter-TSS (ENSSSCT00000041320)	ENSSSCT00000058910	-133
1	197227072	197227412	0.000128655	Intergenic	ENSSSCT00000005653	-81987
14	23808570	23808820	0.000128655	Intergenic	ENSSSCT00000087257	137373
2	59946290	59946504	0.000128655	intron (ENSSSCT00000048608, intron 2 of 4)	ENSSSCT00000048608	6462
10	5684953	5685168	0.000132397	Intergenic	ENSSSCT00000076597	40218
15	43164319	43164603	0.000132397	Intergenic	ENSSSCT00000085892	-25351
6	127735475	127735685	0.000132397	Intergenic	ENSSSCT00000006356	-94616
9	102936179	102936378	0.000132397	intron (ENSSSCT00000049275, intron 3 of 6)	ENSSSCT00000072372	16066
1	25363327	25363610	0.000132786	intron (ENSSSCT00000004580, intron 1 of 3)	ENSSSCT00000089245	779
5	33105538	33105808	0.000133	promoter-TSS (ENSSSCT00000000526)	ENSSSCT00000000526	-80
10	47140671	47140881	0.000138594	promoter-TSS (ENSSSCT00000065099)	ENSSSCT00000065099	-57
13	108660360	108660559	0.000138594	promoter-TSS (ENSSSCT00000032293)	ENSSSCT00000032293	9
14	45249466	45249665	0.000138594	TTS (ENSSSCT00000067081)	ENSSSCT00000068930	373
14	87588864	87589100	0.000138594	promoter-TSS (ENSSSCT00000051558)	ENSSSCT00000054933	-412
3	39348629	39348833	0.000138594	intron (ENSSSCT00000041532, intron 1 of 4)	ENSSSCT00000057062	-1723
X	61551269	61551468	0.000138594	promoter-TSS (ENSSSCT00000030963)	ENSSSCT00000030963	-412
1	118736380	118736581	0.000153884	Intergenic	ENSSSCT00000070797	-163029
12	14548324	14548566	0.000153884	intron (ENSSSCT00000030273, intron 6 of 19)	ENSSSCT00000044670	-22865
13	37153860	37154121	0.000153884	Intergenic	ENSSSCT00000069814	-24137
4	77997000	77997212	0.000153884	intron (ENSSSCT00000071867, intron 18 of 19)	ENSSSCT00000050513	91686
4	85869394	85869593	0.000153884	intron (ENSSSCT00000053615, intron 7 of 7)	ENSSSCT00000049255	4238
6	10634860	10635059	0.000153884	intron (ENSSSCT00000063815, intron 22 of 23)	ENSSSCT00000026364	69664
9	112471027	112471246	0.000153884	Intergenic	ENSSSCT00000084612	130092
1	127767489	127767850	0.000161552	promoter-TSS (ENSSSCT00000088612)	ENSSSCT00000088612	-123
17	37224367	37224712	0.00016236	promoter-TSS (ENSSSCT00000083384)	ENSSSCT00000083384	-9
2	141397659	141398048	0.00016236	promoter-TSS (ENSSSCT00000071873)	ENSSSCT00000050070	-212
2	61105039	61105390	0.00016236	promoter-TSS (ENSSSCT00000059218)	ENSSSCT00000015137	-89
16	23682495	23683062	0.000162873	intron (ENSSSCT00000062781, intron 14 of 28)	ENSSSCT00000060018	60936
18	50922931	50923173	0.000168516	intron (ENSSSCT00000088099, intron 5 of 18)	ENSSSCT00000075783	44792
1	167915563	167915829	0.000172579	Intergenic	ENSSSCT00000005484	-59785
10	52601272	52601529	0.000172579	intron (ENSSSCT00000012129, intron 1 of 8)	ENSSSCT00000012129	333
11	1405664	1405980	0.000172579	promoter-TSS (ENSSSCT00000049706)	ENSSSCT00000050830	-13
5	16176971	16177257	0.000172579	promoter-TSS (ENSSSCT00000085569)	ENSSSCT00000051991	-10
5	69878898	69879104	0.000172579	Intergenic	ENSSSCT00000000833	-3148
9	77509148	77509432	0.000172579	promoter-TSS (ENSSSCT00000090281)	ENSSSCT00000061243	-120
16	23683618	23683903	0.000174611	intron (ENSSSCT00000062781, intron 14 of 28)	ENSSSCT00000060018	59954
1	158288512	158288929	0.000182245	exon (ENSSSCT00000076201, exon 1 of 9)	ENSSSCT00000068024	176
3	17896220	17896520	0.000182245	intron (ENSSSCT00000008543, intron 1 of 3)	ENSSSCT00000008543	9475
5	21517631	21518186	0.000184434	promoter-TSS (ENSSSCT00000055523)	ENSSSCT00000055523	-162
13	79610577	79611061	0.000184686	promoter-TSS (ENSSSCT00000026312)	ENSSSCT00000044249	21
1	146836211	146836693	0.000191558	Intergenic	ENSSSCT00000067692	-67036
6	153685487	153685836	0.000192339	promoter-TSS (ENSSSCT00000057200)	ENSSSCT00000057200	-21
6	81418878	81419256	0.000192339	Intergenic	ENSSSCT00000047396	5008
3	68540682	68541007	0.000192854	intron (ENSSSCT00000057437, intron 1 of 7)	ENSSSCT00000009065	138
14	30024026	30024251	0.000194439	promoter-TSS (ENSSSCT00000010728)	ENSSSCT00000010728	78
15	100065510	100065802	0.000194439	intron (ENSSSCT00000083961, intron 1 of 8)	ENSSSCT00000083961	582
15	3525971	3526230	0.000194439	promoter-TSS (ENSSSCT00000017063)	ENSSSCT00000017063	60
4	80093374	80093573	0.000194439	intron (ENSSSCT00000059279, intron 6 of 18)	ENSSSCT00000084866	97170
14	54281542	54281990	0.000195587	intron (ENSSSCT00000083716, intron 1 of 106)	ENSSSCT00000091271	63050
14	47266631	47266869	0.000195635	promoter-TSS (ENSSSCT00000010955)	ENSSSCT00000010955	61
17	38637451	38637752	0.000195635	TTS (ENSSSCT00000072846)	ENSSSCT00000072846	6275
13	65759423	65760098	0.000198672	promoter-TSS (ENSSSCT00000047624)	ENSSSCT00000085401	-26
13	21077295	21077862	0.000209493	intron (ENSSSCT00000057643, intron 18 of 19)	ENSSSCT00000021430	39136
4	75646034	75646654	0.000217545	promoter-TSS (ENSSSCT00000058495)	ENSSSCT00000058495	-219
1	31244175	31244411	0.000233952	Intergenic	ENSSSCT00000020420	-30694
13	72195660	72195940	0.000233952	promoter-TSS (ENSSSCT00000088166)	ENSSSCT00000042022	86
14	51289244	51289458	0.000233952	exon (ENSSSCT00000039199, exon 1 of 9)	ENSSSCT00000039199	208
14	54638628	54638936	0.000233952	intron (ENSSSCT00000076682, intron 2 of 31)	ENSSSCT00000076682	13977
14	76511098	76511401	0.000233952	promoter-TSS (ENSSSCT00000011282)	ENSSSCT00000011282	68
2	131856912	131857283	0.000233952	promoter-TSS (ENSSSCT00000015579)	ENSSSCT00000081422	-71
9	33003045	33003313	0.000233952	promoter-TSS (ENSSSCT00000041752)	ENSSSCT00000051028	-97
1	162601783	162602083	0.000235594	intron (ENSSSCT00000054104, intron 2 of 29)	ENSSSCT00000072208	39772
12	3559538	3559784	0.000235594	intron (ENSSSCT00000042234, intron 58 of 82)	ENSSSCT00000076171	59004
13	32195346	32195556	0.000235594	exon (ENSSSCT00000077819, exon 10 of 15)	ENSSSCT00000066828	-10158
15	28651083	28651316	0.000235594	Intergenic	ENSSSCT00000043703	186017
15	33577507	33577710	0.000235594	TTS (ENSSSCT00000044724)	ENSSSCT00000055145	41172
16	70041579	70041879	0.000235594	Intergenic	ENSSSCT00000021150	-68594
17	37202615	37202852	0.000235594	exon (ENSSSCT00000053969, exon 3 of 4)	ENSSSCT00000007953	-12892
3	69206032	69206236	0.000235594	exon (ENSSSCT00000043615, exon 1 of 8)	ENSSSCT00000043615	621
8	53280113	53280364	0.000235594	Intergenic	ENSSSCT00000057049	-57790
13	189295588	189295818	0.000246205	intron (ENSSSCT00000057131, intron 2 of 10)	ENSSSCT00000060835	-1693
8	19413365	19413594	0.000246205	Intergenic	ENSSSCT00000030435	37713
X	88777388	88777587	0.000246205	intron (ENSSSCT00000047406, intron 3 of 33)	ENSSSCT00000013746	179915
13	33664035	33664415	0.000247196	promoter-TSS (ENSSSCT00000012500)	ENSSSCT00000012500	-247
1	268531457	268531768	0.00025151	promoter-TSS (ENSSSCT00000050535)	ENSSSCT00000050535	-140
1	243414810	243415032	0.00025312	exon (ENSSSCT00000039649, exon 1 of 9)	ENSSSCT00000005943	669
5	44558392	44558593	0.00025312	intron (ENSSSCT00000000584, intron 1 of 11)	ENSSSCT00000000584	234
8	29921067	29921266	0.00025312	Intergenic	ENSSSCT00000089272	37380
5	6174826	6175302	0.000273446	promoter-TSS (ENSSSCT00000021363)	ENSSSCT00000086723	212
5	6784504	6784848	0.000273446	promoter-TSS (ENSSSCT00000023268)	ENSSSCT00000023268	-4
7	36920483	36920818	0.000273446	exon (ENSSSCT00000001802, exon 1 of 8)	ENSSSCT00000001808	134
8	6452118	6452607	0.000279592	promoter-TSS (ENSSSCT00000038824)	ENSSSCT00000091220	-16
10	21081491	21081703	0.000287896	intron (ENSSSCT00000045124, intron 7 of 9)	ENSSSCT00000085480	-34754
12	26768683	26768924	0.000287896	exon (ENSSSCT00000088161, exon 4 of 10)	ENSSSCT00000088161	4568
13	110306833	110307032	0.000287896	intron (ENSSSCT00000012861, intron 1 of 27)	ENSSSCT00000066149	-13574
14	35336487	35336686	0.000287896	intron (ENSSSCT00000048207, intron 9 of 12)	ENSSSCT00000020194	-2239
2	79163077	79163276	0.000287896	Intergenic	ENSSSCT00000022836	-19795
3	69067428	69067627	0.000287896	intron (ENSSSCT00000009082, intron 3 of 6)	ENSSSCT00000080705	23814
8	26535617	26535816	0.000287896	Intergenic	ENSSSCT00000009592	-254886
9	91832711	91832935	0.000287896	Intergenic	ENSSSCT00000022993	-11204
1	113084913	113085800	0.000292933	promoter-TSS (ENSSSCT00000052540)	ENSSSCT00000037087	-84
3	25847588	25848188	0.000298731	Intergenic	ENSSSCT00000008616	-21780
10	69177810	69178122	0.000300564	intron (ENSSSCT00000058751, intron 9 of 14)	ENSSSCT00000087917	70248
9	1824563	1824762	0.000300564	intron (ENSSSCT00000081497, intron 2 of 2)	ENSSSCT00000052598	6097
X	113347321	113347667	0.000300564	Intergenic	ENSSSCT00000035277	5774
14	50347078	50347430	0.000307114	Intergenic	ENSSSCT00000054312	-18597
8	20453134	20453395	0.000307114	Intergenic	ENSSSCT00000059551	-3099
3	126220202	126220578	0.000309185	promoter-TSS (ENSSSCT00000035469)	ENSSSCT00000035469	-81
1	159532218	159532440	0.000311491	intron (ENSSSCT00000005408, intron 1 of 1)	ENSSSCT00000005408	1706
11	2449091	2449459	0.000311491	intron (ENSSSCT00000041028, intron 1 of 9)	ENSSSCT00000042692	-6655
12	33817505	33817773	0.000311491	intron (ENSSSCT00000037980, intron 7 of 14)	ENSSSCT00000044888	238567
6	78241628	78241979	0.000311491	exon (ENSSSCT00000075221, exon 1 of 7)	ENSSSCT00000047279	160
6	81073667	81073932	0.000311491	promoter-TSS (ENSSSCT00000061504)	ENSSSCT00000061504	4
8	77237850	77238076	0.000311491	promoter-TSS (ENSSSCT00000009874)	ENSSSCT00000009874	-4
9	37006337	37006622	0.000311491	promoter-TSS (ENSSSCT00000016374)	ENSSSCT00000016374	-83
1	51428454	51428837	0.000318796	Intergenic	ENSSSCT00000021536	-15712
7	8518470	8518822	0.000318796	promoter-TSS (ENSSSCT00000001143)	ENSSSCT00000001143	-699
13	205313871	205314120	0.000319203	promoter-TSS (ENSSSCT00000030786)	ENSSSCT00000078925	-278
16	51907097	51907487	0.000319203	promoter-TSS (ENSSSCT00000032305)	ENSSSCT00000032305	-196
2	69473781	69474017	0.000319203	promoter-TSS (ENSSSCT00000047677)	ENSSSCT00000039073	-132
7	31550494	31550827	0.000319203	promoter-TSS (ENSSSCT00000001727)	ENSSSCT00000050456	-23
16	27772675	27772959	0.000340194	Intergenic	ENSSSCT00000079805	-7252
X	19598316	19598600	0.000340194	Intergenic	ENSSSCT00000082259	21506
6	1448432	1448658	0.000340583	intron (ENSSSCT00000023919, intron 5 of 12)	ENSSSCT00000071793	25460
17	63387447	63387784	0.000345166	Intergenic	ENSSSCT00000037320	-25626
5	17332312	17332652	0.000354902	intron (ENSSSCT00000000252, intron 2 of 11)	ENSSSCT00000068474	2626
7	2176534	2176734	0.000359	Intergenic	ENSSSCT00000080341	5424
17	27807923	27808153	0.000359204	intron (ENSSSCT00000023356, intron 1 of 11)	ENSSSCT00000023356	794
18	48755835	48756083	0.000359204	intron (ENSSSCT00000075140, intron 1 of 7)	ENSSSCT00000075140	332
5	100428860	100429099	0.000359204	promoter-TSS (ENSSSCT00000083135)	ENSSSCT00000059893	225
6	14715543	14715766	0.000359204	intron (ENSSSCT00000003035, intron 1 of 17)	ENSSSCT00000003035	171
9	104522	105374	0.000388889	promoter-TSS (ENSSSCT00000074433)	ENSSSCT00000074433	-212
1	121145878	121146364	0.000389516	promoter-TSS (ENSSSCT00000064891)	ENSSSCT00000050675	-5
3	44022545	44022825	0.000410841	promoter-TSS (ENSSSCT00000044871)	ENSSSCT00000084504	-50
4	88161571	88161773	0.000410841	exon (ENSSSCT00000051570, exon 9 of 12)	ENSSSCT00000006951	11211
6	2595993	2596215	0.000410841	exon (ENSSSCT00000045590, exon 2 of 3)	ENSSSCT00000040450	1232
7	75756164	75756958	0.000422975	exon (ENSSSCT00000002263, exon 1 of 8)	ENSSSCT00000002263	139
1	105958848	105959068	0.00043072	Intergenic	ENSSSCT00000038773	54317
12	39982024	39982255	0.00043072	intron (ENSSSCT00000051594, intron 1 of 6)	ENSSSCT00000066576	7347
13	140018833	140019058	0.00043072	intron (ENSSSCT00000047432, intron 7 of 11)	ENSSSCT00000059128	44360
15	119247916	119248125	0.00043072	Intergenic	ENSSSCT00000086590	-158481
8	111956777	111956976	0.00046	intron (ENSSSCT00000059181, intron 3 of 10)	ENSSSCT00000010001	53204
13	71446645	71446844	0.000460233	exon (ENSSSCT00000028260, exon 8 of 12)	ENSSSCT00000028260	37123
8	38850791	38850990	0.000460233	intron (ENSSSCT00000091528, intron 2 of 2)	ENSSSCT00000091528	18147
9	20167442	20167641	0.000460233	Intergenic	ENSSSCT00000069902	-11190
1	43920376	43920575	0.000464965	Intergenic	ENSSSCT00000082371	-15446
17	24821816	24822015	0.000464965	Intergenic	ENSSSCT00000059554	11706
2	75851329	75851577	0.00047856	intron (ENSSSCT00000088220, intron 13 of 18)	ENSSSCT00000040770	-5901
11	67018780	67019318	0.000479702	promoter-TSS (ENSSSCT00000010426)	ENSSSCT00000010426	-250
11	79027792	79028059	0.000494359	promoter-TSS (ENSSSCT00000064392)	ENSSSCT00000042852	-3
7	10452834	10453168	0.000494359	Intergenic	ENSSSCT00000033515	93790
10	23222245	23222569	0.000515035	promoter-TSS (ENSSSCT00000031167)	ENSSSCT00000031167	-282
12	50728566	50728931	0.000515035	promoter-TSS (ENSSSCT00000048100)	ENSSSCT00000048100	-10
14	138935624	138935889	0.000515035	promoter-TSS (ENSSSCT00000041315)	ENSSSCT00000042984	251
5	12638228	12638623	0.000515035	promoter-TSS (ENSSSCT00000000169)	ENSSSCT00000047006	-63
5	4649104	4649404	0.000515035	promoter-TSS (ENSSSCT00000000023)	ENSSSCT00000000023	71
3	46992543	46992971	0.000516743	promoter-TSS (ENSSSCT00000008909)	ENSSSCT00000008909	-20
6	37193607	37193970	0.000516743	promoter-TSS (ENSSSCT00000050959)	ENSSSCT00000041701	77
2	71365654	71365975	0.000525614	promoter-TSS (ENSSSCT00000025675)	ENSSSCT00000025675	23
6	54590423	54590723	0.000525614	exon (ENSSSCT00000003540, exon 1 of 10)	ENSSSCT00000003540	235
7	38213164	38213381	0.000525614	exon (ENSSSCT00000001852, exon 1 of 7)	ENSSSCT00000001852	209
12	27119900	27120381	0.000526179	promoter-TSS (ENSSSCT00000048912)	ENSSSCT00000048912	-212
11	67550445	67550725	0.000534191	intron (ENSSSCT00000010428, intron 2 of 11)	ENSSSCT00000087053	-25792
14	79464698	79464924	0.000534191	intron (ENSSSCT00000058903, intron 18 of 27)	ENSSSCT00000076479	-265905
17	55217390	55217680	0.000534191	Intergenic	ENSSSCT00000073104	54585
X	94991750	94991988	0.000534191	exon (ENSSSCT00000076708, exon 6 of 6)	ENSSSCT00000068538	18194
13	204711842	204712041	0.000539705	Intergenic	ENSSSCT00000086326	28083
13	65502272	65502519	0.000539705	intron (ENSSSCT00000072818, intron 2 of 21)	ENSSSCT00000072818	12541
15	56830535	56830734	0.000539705	Intergenic	ENSSSCT00000079893	-13750
2	100606004	100606227	0.000539705	intron (ENSSSCT00000015467, intron 11 of 11)	ENSSSCT00000065997	157367
3	126004579	126004791	0.000539705	Intergenic	ENSSSCT00000087865	-73733
3	34401005	34401225	0.000539705	Intergenic	ENSSSCT00000078118	-140754
6	15085671	15085870	0.000539705	intron (ENSSSCT00000060070, intron 12 of 34)	ENSSSCT00000003044	-21388
9	76674363	76674562	0.000539705	Intergenic	ENSSSCT00000028067	-25099
13	125102409	125102608	0.000561191	exon (ENSSSCT00000063945, exon 2 of 2)	ENSSSCT00000063945	3722
13	133689586	133689801	0.000561191	promoter-TSS (ENSSSCT00000030409)	ENSSSCT00000030409	-65
13	151298383	151298663	0.000561191	promoter-TSS (ENSSSCT00000085312)	ENSSSCT00000013066	-31
17	39424485	39424687	0.000561191	intron (ENSSSCT00000060963, intron 1 of 24)	ENSSSCT00000049303	6869
17	58359927	58360126	0.000561191	Intergenic	ENSSSCT00000008225	-13149
2	106555470	106555679	0.000561191	exon (ENSSSCT00000015491, exon 1 of 3)	ENSSSCT00000074212	205
3	111919603	111919803	0.000561191	promoter-TSS (ENSSSCT00000050248)	ENSSSCT00000023065	243
3	45513298	45513497	0.000561191	intron (ENSSSCT00000057327, intron 2 of 18)	ENSSSCT00000086735	24990
3	54775504	54775757	0.000561191	promoter-TSS (ENSSSCT00000041618)	ENSSSCT00000041618	-84
8	107517678	107517923	0.000561191	Intergenic	ENSSSCT00000064404	-393173
12	50509373	50509631	0.000589633	exon (ENSSSCT00000019460, exon 3 of 4)	ENSSSCT00000073750	1120
2	61349155	61349430	0.000589633	Intergenic	ENSSSCT00000079414	-8705
9	59282071	59282375	0.000589633	intron (ENSSSCT00000045908, intron 2 of 7)	ENSSSCT00000085089	213218
13	90971207	90971845	0.000597096	promoter-TSS (ENSSSCT00000036924)	ENSSSCT00000036924	-115
11	50883525	50883901	0.000604937	Intergenic	ENSSSCT00000059820	-96939
2	2318195	2318452	0.000604937	Intergenic	ENSSSCT00000064885	-32469
2	5212572	5212801	0.000604937	intron (ENSSSCT00000060820, intron 12 of 18)	ENSSSCT00000047647	4734
6	49178606	49179107	0.0006546	promoter-TSS (ENSSSCT00000046878)	ENSSSCT00000046008	-443
10	68756876	68757077	0.00066477	Intergenic	ENSSSCT00000051140	-13187
18	7179851	7180050	0.00066477	intron (ENSSSCT00000017934, intron 1 of 39)	ENSSSCT00000025803	4950
5	78415210	78415409	0.00066477	Intergenic	ENSSSCT00000047570	-34385
6	84866849	84867048	0.00066477	Intergenic	ENSSSCT00000060129	-8966
X	118534376	118534605	0.00066477	intron (ENSSSCT00000024012, intron 2 of 2)	ENSSSCT00000024012	32889
10	39875191	39876039	0.000684741	Intergenic	ENSSSCT00000087611	-3028
18	47169424	47169964	0.000706794	promoter-TSS (ENSSSCT00000018195)	ENSSSCT00000018195	-172
14	129742130	129742419	0.000718806	promoter-TSS (ENSSSCT00000011689)	ENSSSCT00000011689	16
14	29068239	29068562	0.000718806	promoter-TSS (ENSSSCT00000064314)	ENSSSCT00000010705	-30
14	99929345	99929574	0.000718806	promoter-TSS (ENSSSCT00000073618)	ENSSSCT00000073618	11
18	52466017	52466253	0.000718806	intron (ENSSSCT00000018248, intron 2 of 14)	ENSSSCT00000047336	-17245
2	66262432	66262693	0.000718806	exon (ENSSSCT00000015001, exon 1 of 3)	ENSSSCT00000015001	138
3	70696381	70696594	0.000718806	Intergenic	ENSSSCT00000069968	-85580
8	47702660	47702943	0.000718806	promoter-TSS (ENSSSCT00000009719)	ENSSSCT00000009719	-53
9	39655381	39655769	0.000719057	promoter-TSS (ENSSSCT00000079652)	ENSSSCT00000079652	-146
2	75550689	75550971	0.00072791	promoter-TSS (ENSSSCT00000073677)	ENSSSCT00000073677	-901
3	40256914	40257234	0.00072791	promoter-TSS (ENSSSCT00000086940)	ENSSSCT00000008787	-93
16	68349932	68350536	0.000764245	promoter-TSS (ENSSSCT00000018582)	ENSSSCT00000052940	26
1	42911162	42911361	0.000785864	Intergenic	ENSSSCT00000070607	-13710
10	62303777	62304049	0.000785864	intron (ENSSSCT00000076015, intron 2 of 6)	ENSSSCT00000090785	79450
12	20662081	20662280	0.000785864	intron (ENSSSCT00000074678, intron 1 of 8)	ENSSSCT00000074678	3298
13	144647495	144647697	0.000785864	intron (ENSSSCT00000069685, intron 3 of 7)	ENSSSCT00000040414	-189310
15	78872938	78873176	0.000785864	intron (ENSSSCT00000089992, intron 1 of 28)	ENSSSCT00000089992	21878
3	2791333	2791540	0.000785864	Intergenic	ENSSSCT00000091563	-22892
4	109096710	109096930	0.000785864	promoter-TSS (ENSSSCT00000007444)	ENSSSCT00000007444	-406
4	14203890	14204159	0.000785864	Intergenic	ENSSSCT00000076520	32926
7	5457134	5457333	0.000785864	Intergenic	ENSSSCT00000080230	-66614
7	89130816	89131015	0.000785864	exon (ENSSSCT00000002539, exon 12 of 12)	ENSSSCT00000063812	36846
7	92364511	92364710	0.000785864	Intergenic	ENSSSCT00000087749	-7325
9	106436698	106436913	0.000785864	Intergenic	ENSSSCT00000086274	108248
X	14058462	14058661	0.000785864	intron (ENSSSCT00000032786, intron 2 of 8)	ENSSSCT00000013290	-38756
16	71275978	71276506	0.000815381	promoter-TSS (ENSSSCT00000059335)	ENSSSCT00000059335	-164
8	76481635	76482050	0.000815381	promoter-TSS (ENSSSCT00000078597)	ENSSSCT00000078597	-3
13	159134427	159134679	0.000815993	intron (ENSSSCT00000036967, intron 5 of 6)	ENSSSCT00000074836	57436
15	15740958	15741192	0.000815993	Intergenic	ENSSSCT00000064879	-69553
15	56003159	56003404	0.000815993	intron (ENSSSCT00000026451, intron 2 of 2)	ENSSSCT00000087353	854
17	10624695	10625033	0.000815993	promoter-TSS (ENSSSCT00000080650)	ENSSSCT00000068949	452
3	121480696	121480944	0.000815993	Intergenic	ENSSSCT00000075075	-16966
6	75445953	75446234	0.000815993	promoter-TSS (ENSSSCT00000084593)	ENSSSCT00000032385	-8
9	6960501	6960703	0.000815993	intron (ENSSSCT00000038988, intron 2 of 17)	ENSSSCT00000073742	21217
4	129395470	129395885	0.000832866	promoter-TSS (ENSSSCT00000050084)	ENSSSCT00000007592	-94
3	43552422	43553504	0.000841748	intron (ENSSSCT00000045315, intron 3 of 3)	ENSSSCT00000090388	-8870
13	107017864	107018320	0.000859192	Intergenic	ENSSSCT00000048128	-122906
13	45527031	45527372	0.000859192	exon (ENSSSCT00000012577, exon 1 of 9)	ENSSSCT00000012577	130
2	116256895	116257212	0.000859192	promoter-TSS (ENSSSCT00000077301)	ENSSSCT00000074639	-12
12	42115274	42115473	0.000859371	Intergenic	ENSSSCT00000019295	-4994
13	96643245	96643444	0.000859371	promoter-TSS (ENSSSCT00000076089)	ENSSSCT00000076089	-65
15	65431534	65431733	0.000859371	promoter-TSS (ENSSSCT00000091313)	ENSSSCT00000076213	-126
15	96313896	96314095	0.000859371	promoter-TSS (ENSSSCT00000050906)	ENSSSCT00000050906	92
3	32138676	32138919	0.000860717	intron (ENSSSCT00000073728, intron 1 of 19)	ENSSSCT00000073728	1789
3	46901623	46902011	0.000860717	promoter-TSS (ENSSSCT00000055229)	ENSSSCT00000055229	23
6	47638830	47639180	0.000860717	promoter-TSS (ENSSSCT00000028591)	ENSSSCT00000028591	-118
7	58998636	58998934	0.000860717	promoter-TSS (ENSSSCT00000082441)	ENSSSCT00000002134	-104
15	17207168	17207367	0.000865	Intergenic	ENSSSCT00000088020	-16974
3	64032213	64032425	0.000865038	intron (ENSSSCT00000025211, intron 3 of 18)	ENSSSCT00000053585	-20501
7	104009181	104009637	0.000890453	promoter-TSS (ENSSSCT00000087026)	ENSSSCT00000077598	-95
17	30350944	30351525	0.000899033	promoter-TSS (ENSSSCT00000007789)	ENSSSCT00000007789	-300
6	49272828	49273147	0.000910629	intron (ENSSSCT00000046198, intron 19 of 20)	ENSSSCT00000025796	-7176
2	62184742	62185191	0.000918746	intron (ENSSSCT00000080221, intron 1 of 15)	ENSSSCT00000058689	126
10	41804490	41804748	0.000945612	promoter-TSS (ENSSSCT00000083650)	ENSSSCT00000083650	-901
11	8834752	8835051	0.000945612	intron (ENSSSCT00000025780, intron 13 of 28)	ENSSSCT00000069004	28949
14	72938188	72938416	0.000945612	intron (ENSSSCT00000071348, intron 31 of 34)	ENSSSCT00000038273	-64815
3	629162	629361	0.000945612	intron (ENSSSCT00000083458, intron 2 of 11)	ENSSSCT00000083458	5176
5	21395440	21395664	0.000945612	intron (ENSSSCT00000065108, intron 1 of 3)	ENSSSCT00000000402	245
2	6367623	6367948	0.000979123	intron (ENSSSCT00000014169, intron 9 of 19)	ENSSSCT00000079929	5460
1	17341308	17341507	0.0010088	intron (ENSSSCT00000031199, intron 7 of 16)	ENSSSCT00000031199	61060
11	17848741	17849011	0.0010088	promoter-TSS (ENSSSCT00000043570)	ENSSSCT00000043570	24
13	18775888	18776087	0.0010088	intron (ENSSSCT00000054666, intron 1 of 3)	ENSSSCT00000054666	14542
3	73098416	73098615	0.0010088	intron (ENSSSCT00000084855, intron 3 of 3)	ENSSSCT00000084855	1155
4	35838781	35838980	0.0010088	intron (ENSSSCT00000072688, intron 5 of 6)	ENSSSCT00000068849	-59264
5	74672735	74672943	0.0010088	promoter-TSS (ENSSSCT00000063436)	ENSSSCT00000063436	-102
7	76547241	76547465	0.0010088	intron (ENSSSCT00000026772, intron 4 of 8)	ENSSSCT00000058705	-3990
8	4095664	4095870	0.0010088	intron (ENSSSCT00000032549, intron 1 of 1)	ENSSSCT00000032549	292
9	99251531	99251766	0.0010088	promoter-TSS (ENSSSCT00000031885)	ENSSSCT00000031885	-66
X	29797567	29797774	0.0010088	Intergenic	ENSSSCT00000072501	114010
14	10062116	10062348	0.00101	intron (ENSSSCT00000087313, intron 1 of 2)	ENSSSCT00000080711	-2730
1	263548075	263548300	0.00101368	Intergenic	ENSSSCT00000087768	74754
1	37169128	37169327	0.00101368	intron (ENSSSCT00000004667, intron 2 of 17)	ENSSSCT00000027938	24741
10	22587286	22587485	0.00101368	intron (ENSSSCT00000050323, intron 8 of 10)	ENSSSCT00000082745	-1698
10	48667589	48667800	0.00101368	Intergenic	ENSSSCT00000077596	65968
11	64272428	64272627	0.00101368	intron (ENSSSCT00000032528, intron 1 of 29)	ENSSSCT00000037963	36864
12	20364157	20364356	0.00101368	Intergenic	ENSSSCT00000037200	-8220
15	75202094	75202294	0.00101368	intron (ENSSSCT00000060525, intron 8 of 8)	ENSSSCT00000068724	-81731
18	30898439	30898672	0.00101368	Intergenic	ENSSSCT00000021790	-36128
2	119500517	119500716	0.00101368	intron (ENSSSCT00000084841, intron 4 of 5)	ENSSSCT00000023333	-25826
2	96426495	96426694	0.00101368	intron (ENSSSCT00000056775, intron 2 of 3)	ENSSSCT00000073141	28635
4	78614286	78614485	0.00101368	intron (ENSSSCT00000086808, intron 9 of 14)	ENSSSCT00000048327	70265
8	84744076	84744275	0.00101368	Intergenic	ENSSSCT00000009911	-67597
1	254249757	254250009	0.00101682	Intergenic	ENSSSCT00000006027	41734
16	71501383	71501707	0.00101682	exon (ENSSSCT00000018600, exon 17 of 27)	ENSSSCT00000018600	32585
17	51181030	51181236	0.00101682	intron (ENSSSCT00000075928, intron 4 of 9)	ENSSSCT00000043704	-6417
4	34998310	34998572	0.00101682	intron (ENSSSCT00000033719, intron 2 of 8)	ENSSSCT00000066808	68602
6	71978306	71978505	0.00101682	exon (ENSSSCT00000051774, exon 2 of 3)	ENSSSCT00000003810	3242
7	4686826	4687061	0.00101682	Intergenic	ENSSSCT00000001115	-1058
1	263444021	263444297	0.00102055	Intergenic	ENSSSCT00000006450	-3740
4	103581366	103581787	0.00102055	intron (ENSSSCT00000073364, intron 7 of 7)	ENSSSCT00000069141	17139
6	69777538	69777737	0.00102055	intron (ENSSSCT00000044089, intron 2 of 4)	ENSSSCT00000044089	56831
13	109029360	109029878	0.0010781	promoter-TSS (ENSSSCT00000012857)	ENSSSCT00000012857	-333
14	55056747	55057140	0.00113671	promoter-TSS (ENSSSCT00000011111)	ENSSSCT00000083897	-112
6	97324341	97324713	0.00114	promoter-TSS (ENSSSCT00000080447)	ENSSSCT00000039541	-200
18	9150103	9150737	0.00123126	exon (ENSSSCT00000017959, exon 1 of 4)	ENSSSCT00000017959	109
1	118401212	118401411	0.00123229	Intergenic	ENSSSCT00000087319	33344
1	243153869	243154068	0.00123229	Intergenic	ENSSSCT00000061821	-12550
12	11018509	11018708	0.00123229	promoter-TSS (ENSSSCT00000035633)	ENSSSCT00000035633	33
13	139730216	139730415	0.00123229	promoter-TSS (ENSSSCT00000072815)	ENSSSCT00000049423	186
14	118629260	118629499	0.00123229	intron (ENSSSCT00000057420, intron 1 of 4)	ENSSSCT00000086298	107
2	5784255	5784457	0.00123229	intron (ENSSSCT00000062687, intron 2 of 4)	ENSSSCT00000059106	16102
2	80990946	80991145	0.00123229	intron (ENSSSCT00000035770, intron 8 of 29)	ENSSSCT00000069870	20045
5	3833161	3833360	0.00123229	Intergenic	ENSSSCT00000023423	-35030
5	88104637	88104843	0.00123229	promoter-TSS (ENSSSCT00000000984)	ENSSSCT00000000984	2
9	101693095	101693294	0.00123229	intron (ENSSSCT00000051208, intron 3 of 21)	ENSSSCT00000067088	79363
15	105970233	105970591	0.001242	promoter-TSS (ENSSSCT00000076560)	ENSSSCT00000076560	-15
15	467743	468218	0.001242	promoter-TSS (ENSSSCT00000047745)	ENSSSCT00000047745	-15
1	31185121	31185385	0.00125236	intron (ENSSSCT00000080051, intron 1 of 12)	ENSSSCT00000080051	264
13	6905039	6905238	0.00125236	promoter-TSS (ENSSSCT00000045035)	ENSSSCT00000045035	-210
14	126882512	126882711	0.00125236	intron (ENSSSCT00000079731, intron 5 of 10)	ENSSSCT00000058601	16583
2	6903267	6903498	0.00125236	intron (ENSSSCT00000048416, intron 1 of 2)	ENSSSCT00000048416	163
3	125352088	125352291	0.00125236	promoter-TSS (ENSSSCT00000080848)	ENSSSCT00000080848	-930
5	13579930	13580243	0.00125236	promoter-TSS (ENSSSCT00000055709)	ENSSSCT00000084155	-50
8	136659166	136659391	0.00125236	intron (ENSSSCT00000073704, intron 1 of 2)	ENSSSCT00000073704	1822
4	6920418	6920914	0.00129169	intron (ENSSSCT00000066818, intron 1 of 1)	ENSSSCT00000066818	16771
8	80304777	80305202	0.00132374	intron (ENSSSCT00000072641, intron 2 of 8)	ENSSSCT00000032998	1822
12	1219643	1219884	0.00133428	promoter-TSS (ENSSSCT00000056667)	ENSSSCT00000055000	-8
14	10383287	10383601	0.00133428	Intergenic	ENSSSCT00000010592	-44056
2	1625636	1625873	0.00133428	promoter-TSS (ENSSSCT00000052819)	ENSSSCT00000052819	18
2	44740004	44740433	0.00133428	promoter-TSS (ENSSSCT00000066532)	ENSSSCT00000066532	43
3	16393774	16394064	0.00133428	promoter-TSS (ENSSSCT00000038052)	ENSSSCT00000090192	-78
3	1902916	1903198	0.00133428	promoter-TSS (ENSSSCT00000052196)	ENSSSCT00000053404	-21
5	21626195	21626443	0.00133428	intron (ENSSSCT00000061313, intron 2 of 7)	ENSSSCT00000061313	1557
6	49358092	49358348	0.00133428	intron (ENSSSCT00000003346, intron 2 of 5)	ENSSSCT00000073641	-2575
7	103768182	103768598	0.00133428	promoter-TSS (ENSSSCT00000061359)	ENSSSCT00000058429	67
10	51620986	51621682	0.00134968	promoter-TSS (ENSSSCT00000012122)	ENSSSCT00000012122	-218
14	50325197	50325579	0.00134968	exon (ENSSSCT00000011050, exon 1 of 1)	ENSSSCT00000011050	459
1	256131296	256131848	0.00135028	Intergenic	ENSSSCT00000091494	-86256
1	180830073	180830311	0.00138414	promoter-TSS (ENSSSCT00000005541)	ENSSSCT00000005541	51
12	47859799	47860031	0.00138414	exon (ENSSSCT00000032386, exon 2 of 18)	ENSSSCT00000090317	360
17	3988878	3989138	0.00138414	Intergenic	ENSSSCT00000059695	-49282
17	43963096	43963334	0.00138414	promoter-TSS (ENSSSCT00000040153)	ENSSSCT00000040153	-223
3	87108531	87108792	0.00138414	intron (ENSSSCT00000069614, intron 1 of 4)	ENSSSCT00000069614	330
4	62139830	62140168	0.00138414	promoter-TSS (ENSSSCT00000051111)	ENSSSCT00000006773	-161
7	2379100	2379410	0.00138414	intron (ENSSSCT00000001094, intron 1 of 19)	ENSSSCT00000050974	-3247
9	103179322	103179551	0.00138414	promoter-TSS (ENSSSCT00000023341)	ENSSSCT00000072147	-67
3	17107774	17108195	0.00138782	exon (ENSSSCT00000081012, exon 1 of 7)	ENSSSCT00000081012	381
12	14571452	14572001	0.00139194	promoter-TSS (ENSSSCT00000089829)	ENSSSCT00000089829	-120
2	4788268	4788750	0.00139194	promoter-TSS (ENSSSCT00000088855)	ENSSSCT00000075463	97
4	95766687	95767082	0.00139194	intron (ENSSSCT00000048640, intron 6 of 15)	ENSSSCT00000048640	7811
6	48002286	48002645	0.00139847	promoter-TSS (ENSSSCT00000089479)	ENSSSCT00000072934	-247
13	100133029	100133310	0.00140108	promoter-TSS (ENSSSCT00000033919)	ENSSSCT00000033919	-201
14	132532281	132532595	0.00140108	exon (ENSSSCT00000049711, exon 1 of 7)	ENSSSCT00000049711	203
15	121265566	121265804	0.00140108	promoter-TSS (ENSSSCT00000017652)	ENSSSCT00000039143	-52
2	33805914	33806224	0.00140108	intron (ENSSSCT00000049311, intron 3 of 26)	ENSSSCT00000049311	99000
5	68000079	68000409	0.00140108	promoter-TSS (ENSSSCT00000038423)	ENSSSCT00000038423	-860
6	81239377	81239724	0.00140108	promoter-TSS (ENSSSCT00000026348)	ENSSSCT00000026348	-415
1	268465765	268466015	0.00142515	promoter-TSS (ENSSSCT00000062690)	ENSSSCT00000006192	-101
11	15751613	15751965	0.00142515	promoter-TSS (ENSSSCT00000010275)	ENSSSCT00000010275	-12
11	4689766	4690050	0.00142515	promoter-TSS (ENSSSCT00000010190)	ENSSSCT00000010190	-476
11	75545038	75545276	0.00142515	intron (ENSSSCT00000010458, intron 1 of 1)	ENSSSCT00000010458	2534
12	18142668	18142931	0.00142515	promoter-TSS (ENSSSCT00000072146)	ENSSSCT00000072146	-13
12	39926802	39927059	0.00142515	promoter-TSS (ENSSSCT00000019278)	ENSSSCT00000019278	12
2	75146734	75146996	0.00142515	promoter-TSS (ENSSSCT00000014728)	ENSSSCT00000066430	-28
3	47704743	47705015	0.00142515	promoter-TSS (ENSSSCT00000008914)	ENSSSCT00000008914	8
16	51792352	51792588	0.00143	intron (ENSSSCT00000024674, intron 1 of 10)	ENSSSCT00000024674	4678
10	8267948	8268147	0.00143027	intron (ENSSSCT00000083731, intron 2 of 4)	ENSSSCT00000083731	4417
11	51289961	51290230	0.00143027	Intergenic	ENSSSCT00000064978	104426
12	52805180	52805379	0.00143027	exon (ENSSSCT00000029425, exon 30 of 32)	ENSSSCT00000029425	25447
13	18539185	18539384	0.00143027	intron (ENSSSCT00000012300, intron 2 of 10)	ENSSSCT00000059524	18722
13	197081165	197081386	0.00143027	intron (ENSSSCT00000039442, intron 2 of 6)	ENSSSCT00000039442	11966
13	33320905	33321110	0.00143027	intron (ENSSSCT00000052076, intron 4 of 51)	ENSSSCT00000080612	55162
13	54157711	54157958	0.00143027	intron (ENSSSCT00000012605, intron 5 of 10)	ENSSSCT00000073805	22917
15	133722956	133723155	0.00143027	intron (ENSSSCT00000085118, intron 9 of 13)	ENSSSCT00000017752	18047
16	26456425	26456624	0.00143027	Intergenic	ENSSSCT00000077103	-9903
16	61729802	61730028	0.00143027	Intergenic	ENSSSCT00000018538	-5658
2	149477978	149478177	0.00143027	intron (ENSSSCT00000039398, intron 2 of 3)	ENSSSCT00000039398	10367
2	57390547	57390755	0.00143027	Intergenic	ENSSSCT00000052004	-9813
5	81502250	81502449	0.00143027	Intergenic	ENSSSCT00000052277	-27492
6	155147517	155147736	0.00143027	intron (ENSSSCT00000004242, intron 2 of 12)	ENSSSCT00000004242	83800
7	35748026	35748225	0.00143027	intron (ENSSSCT00000001777, intron 2 of 2)	ENSSSCT00000057054	5386
7	89295325	89295524	0.00143027	intron (ENSSSCT00000043782, intron 2 of 14)	ENSSSCT00000055552	83875
8	131061507	131061706	0.00143027	Intergenic	ENSSSCT00000010093	-2674
9	118900363	118900602	0.00143027	intron (ENSSSCT00000068877, intron 1 of 21)	ENSSSCT00000079439	68119
9	129542742	129542941	0.00143027	intron (ENSSSCT00000041639, intron 5 of 5)	ENSSSCT00000041639	38138
13	167895560	167896331	0.00144217	promoter-TSS (ENSSSCT00000037851)	ENSSSCT00000037851	-52
12	5193915	5194144	0.00147514	exon (ENSSSCT00000057893, exon 10 of 19)	ENSSSCT00000026568	14650
6	63244703	63245037	0.00155805	Intergenic	ENSSSCT00000088246	-18867
17	33670907	33671276	0.00157748	Intergenic	ENSSSCT00000085166	-13801
2	72780644	72781065	0.00157748	promoter-TSS (ENSSSCT00000014781)	ENSSSCT00000047241	-93
17	46764934	46765183	0.0015906	Intergenic	ENSSSCT00000008066	-2195
5	48890707	48890906	0.00159877	intron (ENSSSCT00000026706, intron 6 of 10)	ENSSSCT00000087245	43233
8	73502344	73502546	0.00159877	promoter-TSS (ENSSSCT00000065756)	ENSSSCT00000065756	-219
1	118756903	118757102	0.0016	Intergenic	ENSSSCT00000070797	-142507
12	45174620	45175000	0.00160676	promoter-TSS (ENSSSCT00000090043)	ENSSSCT00000090043	-269
2	77249289	77249591	0.00160676	promoter-TSS (ENSSSCT00000014673)	ENSSSCT00000014673	-113
13	137918225	137918515	0.00161132	intron (ENSSSCT00000043999, intron 1 of 11)	ENSSSCT00000021629	2573
6	127819173	127819372	0.00161132	Intergenic	ENSSSCT00000006356	-10924
9	3181432	3181631	0.00161132	Intergenic	ENSSSCT00000047703	-21673
10	43928653	43928852	0.0016353	intron (ENSSSCT00000062209, intron 1 of 7)	ENSSSCT00000062209	657
3	24260587	24260786	0.0016353	intron (ENSSSCT00000043695, intron 24 of 25)	ENSSSCT00000008595	-31854
12	17946495	17946713	0.00166628	intron (ENSSSCT00000063247, intron 5 of 13)	ENSSSCT00000019134	-6959
13	61730494	61730779	0.00166628	exon (ENSSSCT00000039200, exon 11 of 11)	ENSSSCT00000039200	26987
14	79864166	79864428	0.00166628	intron (ENSSSCT00000056413, intron 1 of 27)	ENSSSCT00000076479	133581
3	116140321	116140572	0.00166628	Intergenic	ENSSSCT00000085425	36410
3	121365203	121365402	0.00166628	Intergenic	ENSSSCT00000069395	91516
3	20107101	20107328	0.00166628	Intergenic	ENSSSCT00000084767	-44639
3	20315418	20315653	0.00166628	Intergenic	ENSSSCT00000021057	135161
6	62763835	62764121	0.00166628	intron (ENSSSCT00000039252, intron 3 of 3)	ENSSSCT00000031894	5949
7	69571540	69571871	0.00166628	intron (ENSSSCT00000059670, intron 1 of 17)	ENSSSCT00000059670	43795
7	92865198	92865437	0.00166628	intron (ENSSSCT00000002567, intron 1 of 8)	ENSSSCT00000079649	17141
X	118159938	118160200	0.00166628	intron (ENSSSCT00000077746, intron 2 of 3)	ENSSSCT00000089584	-33401
X	124204201	124204435	0.00166628	promoter-TSS (ENSSSCT00000022521)	ENSSSCT00000022521	-229
1	183792613	183792842	0.00167	promoter-TSS (ENSSSCT00000057404)	ENSSSCT00000057404	24
11	27363243	27363473	0.00171123	Intergenic	ENSSSCT00000020839	213471
X	123088500	123088699	0.00171123	promoter-TSS (ENSSSCT00000022634)	ENSSSCT00000022634	-626
11	289156	289355	0.00174371	TTS (ENSSSCT00000042283)	ENSSSCT00000074228	67900
12	14764407	14764694	0.00174371	promoter-TSS (ENSSSCT00000074258)	ENSSSCT00000074258	42
2	144756013	144756214	0.00174371	intron (ENSSSCT00000048485, intron 20 of 20)	ENSSSCT00000091634	37233
4	4665256	4665493	0.00174371	Intergenic	ENSSSCT00000068569	-166699
6	36172980	36173195	0.00174371	intron (ENSSSCT00000003142, intron 6 of 6)	ENSSSCT00000003142	51052
9	5297460	5297729	0.00174371	Intergenic	ENSSSCT00000016108	-9015
X	34952668	34952941	0.00174371	intron (ENSSSCT00000077850, intron 2 of 7)	ENSSSCT00000073196	62717
15	140255892	140256167	0.0017639	promoter-TSS (ENSSSCT00000048311)	ENSSSCT00000056114	-137
1	107689877	107690120	0.00180853	promoter-TSS (ENSSSCT00000046925)	ENSSSCT00000063162	-67
1	50803857	50804072	0.00180853	intron (ENSSSCT00000004726, intron 1 of 11)	ENSSSCT00000050145	22269
11	64294302	64294501	0.00180853	intron (ENSSSCT00000032528, intron 1 of 29)	ENSSSCT00000037963	14990
12	51718864	51719107	0.00180853	intron (ENSSSCT00000019473, intron 1 of 18)	ENSSSCT00000019473	1197
13	121237066	121237267	0.00180853	intron (ENSSSCT00000055495, intron 14 of 25)	ENSSSCT00000044554	26444
13	35640695	35640894	0.00180853	intron (ENSSSCT00000088208, intron 3 of 47)	ENSSSCT00000085788	72040
14	48204564	48204763	0.00180853	promoter-TSS (ENSSSCT00000088712)	ENSSSCT00000010987	-93
15	138158457	138158682	0.00180853	Intergenic	ENSSSCT00000017798	-70072
15	20104636	20104835	0.00180853	promoter-TSS (ENSSSCT00000017110)	ENSSSCT00000090441	-111
15	45763302	45763501	0.00180853	promoter-TSS (ENSSSCT00000047174)	ENSSSCT00000064876	349
17	28357494	28357693	0.00180853	intron (ENSSSCT00000078635, intron 24 of 25)	ENSSSCT00000087578	241123
2	140330860	140331086	0.00180853	promoter-TSS (ENSSSCT00000046624)	ENSSSCT00000046624	15
3	72945876	72946075	0.00180853	intron (ENSSSCT00000074048, intron 17 of 17)	ENSSSCT00000074532	-37161
6	149748206	149748432	0.00180853	promoter-TSS (ENSSSCT00000088488)	ENSSSCT00000088488	-101
6	48406153	48406352	0.00180853	promoter-TSS (ENSSSCT00000037756)	ENSSSCT00000037756	-124
7	33236773	33236972	0.00180853	intron (ENSSSCT00000001762, intron 1 of 16)	ENSSSCT00000001762	32258
9	2609334	2609570	0.00180853	intron (ENSSSCT00000015950, intron 7 of 11)	ENSSSCT00000026080	5858
16	23767935	23768384	0.00184782	intron (ENSSSCT00000062781, intron 8 of 28)	ENSSSCT00000065899	-20800
18	51361764	51362282	0.00184782	exon (ENSSSCT00000018240, exon 1 of 7)	ENSSSCT00000018240	155
14	102392987	102393507	0.00188746	Intergenic	ENSSSCT00000073437	35974
1	262061452	262061651	0.00190719	intron (ENSSSCT00000050566, intron 8 of 11)	ENSSSCT00000055541	-51502
11	15904635	15904834	0.00190719	intron (ENSSSCT00000057665, intron 2 of 22)	ENSSSCT00000089179	-17709
12	160984	161183	0.00190719	Intergenic	ENSSSCT00000071760	-9262
13	144272237	144272436	0.00190719	intron (ENSSSCT00000067328, intron 6 of 6)	ENSSSCT00000025516	-132194
14	138392553	138392752	0.00190719	Intergenic	ENSSSCT00000073455	-50817
2	21079990	21080189	0.00190719	Intergenic	ENSSSCT00000081058	-170059
3	24288946	24289149	0.00190719	intron (ENSSSCT00000044621, intron 30 of 31)	ENSSSCT00000008595	-60215
4	45183193	45183392	0.00190719	Intergenic	ENSSSCT00000082685	-212994
6	60526916	60527115	0.00190719	TTS (ENSSSCT00000078290)	ENSSSCT00000078290	3190
9	28021236	28021435	0.00190719	intron (ENSSSCT00000062330, intron 2 of 4)	ENSSSCT00000016332	-46912
9	76510906	76511105	0.00190719	Intergenic	ENSSSCT00000070150	24075
17	62006153	62006549	0.00192983	intron (ENSSSCT00000051674, intron 1 of 3)	ENSSSCT00000051674	17239
3	76728991	76729390	0.00195008	promoter-TSS (ENSSSCT00000076472)	ENSSSCT00000076472	20
5	53691115	53691599	0.00195008	exon (ENSSSCT00000089424, exon 1 of 8)	ENSSSCT00000071537	174
3	17904880	17905331	0.00204918	exon (ENSSSCT00000046330, exon 3 of 3)	ENSSSCT00000046330	10242
5	40197092	40197810	0.00205133	Intergenic	ENSSSCT00000029447	225565
6	53065202	53065802	0.00206306	promoter-TSS (ENSSSCT00000026006)	ENSSSCT00000049575	157
2	136170725	136170987	0.00209192	intron (ENSSSCT00000074041, intron 1 of 1)	ENSSSCT00000074041	24558
6	83543484	83543913	0.00211519	promoter-TSS (ENSSSCT00000028111)	ENSSSCT00000041960	-82
10	43097225	43097563	0.00212375	Intergenic	ENSSSCT00000071398	30634
12	31723558	31723916	0.00212375	promoter-TSS (ENSSSCT00000055244)	ENSSSCT00000055244	-11
14	73323495	73323791	0.00212375	promoter-TSS (ENSSSCT00000059458)	ENSSSCT00000059458	1
2	27684821	27685252	0.00212375	promoter-TSS (ENSSSCT00000014538)	ENSSSCT00000014538	-500
5	17399977	17400205	0.00212375	intron (ENSSSCT00000059252, intron 3 of 8)	ENSSSCT00000059252	14701
6	52877011	52877293	0.00212375	promoter-TSS (ENSSSCT00000003448)	ENSSSCT00000003448	38
7	21835383	21835600	0.00217	intron (ENSSSCT00000022990, intron 2 of 4)	ENSSSCT00000042816	50915
11	33072520	33072767	0.00217165	Intergenic	ENSSSCT00000047877	-77806
12	36068795	36068994	0.00217165	Intergenic	ENSSSCT00000020150	3627
13	3993165	3993417	0.00217165	intron (ENSSSCT00000051393, intron 1 of 5)	ENSSSCT00000051393	456
13	65721356	65721705	0.00217165	promoter-TSS (ENSSSCT00000074709)	ENSSSCT00000012632	17
14	124399990	124400198	0.00217165	promoter-TSS (ENSSSCT00000011646)	ENSSSCT00000011646	-95
17	47723208	47723445	0.00217165	intron (ENSSSCT00000029861, intron 3 of 5)	ENSSSCT00000055313	-11477
2	42257104	42257342	0.00217165	exon (ENSSSCT00000049473, exon 10 of 28)	ENSSSCT00000090279	28166
2	74455721	74455944	0.00217165	promoter-TSS (ENSSSCT00000057652)	ENSSSCT00000070367	49
3	17710857	17711066	0.00217165	Intergenic	ENSSSCT00000008537	-8196
5	41859341	41859543	0.00217165	intron (ENSSSCT00000039923, intron 1 of 17)	ENSSSCT00000051863	19526
6	4479784	4479997	0.00217165	promoter-TSS (ENSSSCT00000002967)	ENSSSCT00000039094	-42
9	28407210	28407461	0.00217165	promoter-TSS (ENSSSCT00000054856)	ENSSSCT00000054856	-18
6	54250069	54250471	0.00218596	promoter-TSS (ENSSSCT00000058830)	ENSSSCT00000044392	-9
9	139506033	139506277	0.00224778	Intergenic	ENSSSCT00000087700	89183
2	134092761	134093097	0.00226605	intron (ENSSSCT00000060769, intron 1 of 19)	ENSSSCT00000015591	442
6	137575519	137575837	0.00226605	promoter-TSS (ENSSSCT00000070971)	ENSSSCT00000070971	-159
6	56610728	56611049	0.00226605	exon (ENSSSCT00000059412, exon 1 of 5)	ENSSSCT00000059412	219
7	121068970	121069169	0.00226605	intron (ENSSSCT00000002790, intron 1 of 2)	ENSSSCT00000037582	-7075
5	39904924	39905262	0.00227664	Intergenic	ENSSSCT00000029484	-160448
3	15943257	15943739	0.00228695	intron (ENSSSCT00000044023, intron 15 of 15)	ENSSSCT00000008475	10367
1	124585937	124586137	0.00228761	Intergenic	ENSSSCT00000074609	21728
14	15718823	15719036	0.00228761	intron (ENSSSCT00000010634, intron 1 of 6)	ENSSSCT00000075801	228
16	42139672	42139884	0.00228761	Intergenic	ENSSSCT00000080083	-86511
16	51469889	51470088	0.00228761	Intergenic	ENSSSCT00000033376	11968
18	18147612	18147842	0.00228761	exon (ENSSSCT00000018020, exon 1 of 1)	ENSSSCT00000018020	603
2	89840044	89840243	0.00228761	intron (ENSSSCT00000015433, intron 1 of 6)	ENSSSCT00000015433	131
4	82794141	82794340	0.00228761	promoter-TSS (ENSSSCT00000076275)	ENSSSCT00000059290	400
7	50163662	50163861	0.00228761	intron (ENSSSCT00000002005, intron 7 of 22)	ENSSSCT00000002005	20328
8	97458137	97458336	0.00228761	Intergenic	ENSSSCT00000068576	-115433
1	128083972	128084177	0.0023344	promoter-TSS (ENSSSCT00000052259)	ENSSSCT00000059846	7
13	100252941	100253206	0.0023344	promoter-TSS (ENSSSCT00000084925)	ENSSSCT00000046911	-3
13	137775291	137775538	0.0023344	intron (ENSSSCT00000040798, intron 3 of 7)	ENSSSCT00000012987	34904
15	87378924	87379251	0.0023344	exon (ENSSSCT00000063031, exon 4 of 20)	ENSSSCT00000056735	101
16	64720985	64721230	0.0023344	intron (ENSSSCT00000018559, intron 11 of 14)	ENSSSCT00000067808	-139868
16	65776234	65776436	0.0023344	exon (ENSSSCT00000018565, exon 11 of 23)	ENSSSCT00000077792	37022
17	35291875	35292094	0.0023344	Intergenic	ENSSSCT00000064936	-23980
2	80246929	80247164	0.0023344	promoter-TSS (ENSSSCT00000058459)	ENSSSCT00000058459	-101
3	38040562	38040761	0.0023344	Intergenic	ENSSSCT00000053529	-7467
3	78031734	78031969	0.0023344	promoter-TSS (ENSSSCT00000063992)	ENSSSCT00000063992	-120
5	36273507	36273839	0.0023344	promoter-TSS (ENSSSCT00000051182)	ENSSSCT00000085462	480
5	80530991	80531208	0.0023344	promoter-TSS (ENSSSCT00000047341)	ENSSSCT00000000926	-94
6	14942711	14942944	0.0023344	promoter-TSS (ENSSSCT00000003043)	ENSSSCT00000071452	-106
8	127128412	127128687	0.0023344	promoter-TSS (ENSSSCT00000090941)	ENSSSCT00000090941	-274
9	133214053	133214252	0.0023344	promoter-TSS (ENSSSCT00000046423)	ENSSSCT00000046423	55
9	66249693	66249969	0.0023344	exon (ENSSSCT00000026414, exon 1 of 10)	ENSSSCT00000026414	153
X	37080100	37080360	0.0023344	promoter-TSS (ENSSSCT00000023085)	ENSSSCT00000023085	-45
11	571988	572220	0.00234921	promoter-TSS (ENSSSCT00000010490)	ENSSSCT00000010490	-14
12	6116428	6116702	0.00234921	promoter-TSS (ENSSSCT00000072506)	ENSSSCT00000072506	-41
13	133182858	133183146	0.00234921	promoter-TSS (ENSSSCT00000073124)	ENSSSCT00000073124	-589
14	12490638	12490966	0.00234921	intron (ENSSSCT00000064732, intron 1 of 7)	ENSSSCT00000047787	53287
18	42652100	42652415	0.00234921	promoter-TSS (ENSSSCT00000048117)	ENSSSCT00000048117	-450
5	64278524	64278723	0.00234921	promoter-TSS (ENSSSCT00000000768)	ENSSSCT00000074386	-154
6	169221312	169221551	0.00234921	promoter-TSS (ENSSSCT00000076505)	ENSSSCT00000076505	-68
6	19969273	19969580	0.00234921	promoter-TSS (ENSSSCT00000003105)	ENSSSCT00000003105	-79
6	47475869	47476152	0.00234921	promoter-TSS (ENSSSCT00000003286)	ENSSSCT00000003287	-169
6	98950873	98951243	0.00234921	Intergenic	ENSSSCT00000004081	-98482
7	121720804	121721015	0.00234921	Intergenic	ENSSSCT00000088347	-2788
1	271986117	271986375	0.00237329	Intergenic	ENSSSCT00000077019	-21723
1	52869984	52870384	0.00237329	intron (ENSSSCT00000073994, intron 9 of 11)	ENSSSCT00000080062	80629
2	7454929	7455213	0.00237329	Intergenic	ENSSSCT00000038860	-23679
16	51457716	51458026	0.00237971	promoter-TSS (ENSSSCT00000081005)	ENSSSCT00000033376	-149
3	28578354	28578680	0.00237971	promoter-TSS (ENSSSCT00000076189)	ENSSSCT00000076189	-67
6	65150638	65150993	0.00237971	promoter-TSS (ENSSSCT00000072622)	ENSSSCT00000075531	-88
13	17533938	17534271	0.00240712	promoter-TSS (ENSSSCT00000044659)	ENSSSCT00000087643	-67
18	5928861	5929248	0.00240712	promoter-TSS (ENSSSCT00000058907)	ENSSSCT00000058907	-170
3	54930657	54930966	0.00240712	promoter-TSS (ENSSSCT00000008960)	ENSSSCT00000008959	-35
6	88986962	88987326	0.00240712	promoter-TSS (ENSSSCT00000041552)	ENSSSCT00000041552	27
10	24974033	24974695	0.00241516	promoter-TSS (ENSSSCT00000073896)	ENSSSCT00000073896	-564
2	1642539	1642868	0.00256176	promoter-TSS (ENSSSCT00000066358)	ENSSSCT00000066358	-310
1	136039512	136039731	0.00259515	Intergenic	ENSSSCT00000091035	21962
1	92935204	92935403	0.00259515	Intergenic	ENSSSCT00000063541	16750
11	49088718	49088917	0.00259515	TTS (ENSSSCT00000010382)	ENSSSCT00000010382	11245
13	1709130	1709329	0.00259515	Intergenic	ENSSSCT00000051930	-21788
13	184496347	184496550	0.00259515	Intergenic	ENSSSCT00000060851	126440
13	74731171	74731370	0.00259515	Intergenic	ENSSSCT00000019842	15395
13	7650179	7650378	0.00259515	Intergenic	ENSSSCT00000066447	-69418
14	13739980	13740194	0.00259515	intron (ENSSSCT00000078924, intron 5 of 6)	ENSSSCT00000010620	-6678
14	2938895	2939103	0.00259515	intron (ENSSSCT00000010515, intron 1 of 8)	ENSSSCT00000010515	96242
14	92637438	92637637	0.00259515	Intergenic	ENSSSCT00000084176	37472
15	32561644	32561858	0.00259515	intron (ENSSSCT00000046863, intron 3 of 5)	ENSSSCT00000046863	31028
15	34960039	34960262	0.00259515	intron (ENSSSCT00000087531, intron 4 of 63)	ENSSSCT00000087531	62773
15	975446	975662	0.00259515	Intergenic	ENSSSCT00000069955	-9963
16	38133336	38133535	0.00259515	intron (ENSSSCT00000051425, intron 3 of 16)	ENSSSCT00000073220	30711
17	46238339	46238538	0.00259515	intron (ENSSSCT00000023856, intron 9 of 12)	ENSSSCT00000008062	-17819
2	117313860	117314059	0.00259515	intron (ENSSSCT00000025962, intron 2 of 22)	ENSSSCT00000025962	77364
3	63697715	63697914	0.00259515	intron (ENSSSCT00000025211, intron 7 of 18)	ENSSSCT00000025495	110315
4	97340938	97341149	0.00259515	Intergenic	ENSSSCT00000007248	-7978
5	71424190	71424447	0.00259515	intron (ENSSSCT00000000848, intron 4 of 9)	ENSSSCT00000072405	151538
6	144608246	144608492	0.00259515	Intergenic	ENSSSCT00000075120	-3399
6	42497450	42497656	0.00259515	Intergenic	ENSSSCT00000085291	13785
7	40626277	40626476	0.00259515	Intergenic	ENSSSCT00000088843	181571
7	49158428	49158627	0.00259515	Intergenic	ENSSSCT00000089483	16070
7	74140824	74141023	0.00259515	Intergenic	ENSSSCT00000087987	-85440
X	20928029	20928228	0.00259515	intron (ENSSSCT00000027952, intron 34 of 35)	ENSSSCT00000022053	115519
15	15325299	15325526	0.00263363	Intergenic	ENSSSCT00000085227	107076
5	22447452	22447696	0.00263363	intron (ENSSSCT00000076647, intron 2 of 8)	ENSSSCT00000076647	11864
12	7819640	7820142	0.00265975	intron (ENSSSCT00000087114, intron 1 of 10)	ENSSSCT00000054077	-19776
15	31140492	31140966	0.00267137	promoter-TSS (ENSSSCT00000038232)	ENSSSCT00000038232	-397
5	63951032	63951370	0.00267137	promoter-TSS (ENSSSCT00000051298)	ENSSSCT00000000752	-475
11	7545011	7545449	0.00271884	promoter-TSS (ENSSSCT00000010225)	ENSSSCT00000010225	-263
2	74414206	74414536	0.00271884	promoter-TSS (ENSSSCT00000014755)	ENSSSCT00000014755	-94
12	14261413	14261936	0.00275522	exon (ENSSSCT00000059620, exon 1 of 2)	ENSSSCT00000059620	902
4	124009588	124009997	0.00275522	promoter-TSS (ENSSSCT00000060895)	ENSSSCT00000037498	-24
3	4587814	4588207	0.00277149	exon (ENSSSCT00000054297, exon 4 of 5)	ENSSSCT00000054297	3496
11	14927076	14927399	0.00285024	Intergenic	ENSSSCT00000084420	-8045
11	2651519	2651725	0.00285024	Intergenic	ENSSSCT00000041413	98824
12	1491223	1491422	0.00285024	intron (ENSSSCT00000061515, intron 6 of 15)	ENSSSCT00000061515	10033
14	140245068	140245338	0.00285024	Intergenic	ENSSSCT00000051884	-90640
14	32320072	32320288	0.00285024	intron (ENSSSCT00000010775, intron 1 of 22)	ENSSSCT00000010775	8429
6	98300633	98300867	0.00285024	intron (ENSSSCT00000082358, intron 5 of 7)	ENSSSCT00000087321	-26802
7	112916179	112916446	0.00285024	Intergenic	ENSSSCT00000071247	-3105
16	8237	9827	0.00286326	Intergenic	ENSSSCT00000022727	-34321
12	36943097	36943311	0.00292097	intron (ENSSSCT00000083993, intron 22 of 22)	ENSSSCT00000030019	-4239
12	54697338	54697566	0.00292097	intron (ENSSSCT00000063861, intron 4 of 13)	ENSSSCT00000063861	17395
13	63031403	63031728	0.00292097	Intergenic	ENSSSCT00000044234	-286531
14	130128520	130128761	0.00292097	Intergenic	ENSSSCT00000069722	-147999
15	65280340	65280548	0.00292097	intron (ENSSSCT00000063743, intron 12 of 15)	ENSSSCT00000041783	-149865
16	50099405	50099633	0.00292097	exon (ENSSSCT00000084950, exon 2 of 2)	ENSSSCT00000084950	9572
18	37247416	37247621	0.00292097	Intergenic	ENSSSCT00000081716	13418
3	60967236	60967460	0.00292097	Intergenic	ENSSSCT00000020975	-513664
3	8843889	8844088	0.00292097	Intergenic	ENSSSCT00000054309	9646
4	122965391	122965618	0.00292097	Intergenic	ENSSSCT00000084899	-12247
4	4486650	4486901	0.00292097	intron (ENSSSCT00000059362, intron 2 of 18)	ENSSSCT00000059362	112385
4	60718869	60719093	0.00292097	Intergenic	ENSSSCT00000054884	-81891
5	55780798	55780997	0.00292097	Intergenic	ENSSSCT00000088564	7688
5	91541089	91541313	0.00292097	Intergenic	ENSSSCT00000070605	-41839
6	165757319	165757523	0.00292097	exon (ENSSSCT00000037351, exon 16 of 20)	ENSSSCT00000027507	-11492
6	33942096	33942295	0.00292097	Intergenic	ENSSSCT00000073306	166247
6	90718066	90718362	0.00292097	Intergenic	ENSSSCT00000080152	44710
7	89765720	89765961	0.00292097	exon (ENSSSCT00000044593, exon 2 of 7)	ENSSSCT00000045021	4117
9	100615868	100616085	0.00292097	Intergenic	ENSSSCT00000085781	230432
9	10970964	10971163	0.00292097	intron (ENSSSCT00000067346, intron 3 of 16)	ENSSSCT00000016225	15249
9	40775284	40775532	0.00292097	intron (ENSSSCT00000034200, intron 1 of 18)	ENSSSCT00000065349	54153
X	66188772	66188991	0.00292097	Intergenic	ENSSSCT00000013620	-576185
1	17734255	17734460	0.00297172	Intergenic	ENSSSCT00000075707	32471
1	260347651	260347870	0.00297172	Intergenic	ENSSSCT00000082390	33565
14	134935165	134935432	0.00297172	Intergenic	ENSSSCT00000070887	21457
14	141393963	141394167	0.00297172	promoter-TSS (ENSSSCT00000048270)	ENSSSCT00000048270	87
15	36129416	36129730	0.00297172	Intergenic	ENSSSCT00000083040	-20039
18	16699083	16699282	0.00297172	intron (ENSSSCT00000047876, intron 13 of 41)	ENSSSCT00000038950	200195
2	81308646	81308882	0.00297172	intron (ENSSSCT00000055561, intron 31 of 31)	ENSSSCT00000015353	-6604
2	88078147	88078424	0.00297172	intron (ENSSSCT00000043586, intron 7 of 9)	ENSSSCT00000083652	-31980
4	112188858	112189139	0.00297172	intron (ENSSSCT00000028041, intron 26 of 27)	ENSSSCT00000074334	45425
5	62420234	62420525	0.00297172	Intergenic	ENSSSCT00000073778	-17638
8	75656381	75656589	0.00297172	Intergenic	ENSSSCT00000009864	-11455
9	48700173	48700396	0.00297172	Intergenic	ENSSSCT00000016501	190202
16	51210553	51211039	0.00299774	intron (ENSSSCT00000049310, intron 3 of 10)	ENSSSCT00000051879	-24023
18	37948755	37949155	0.00299774	promoter-TSS (ENSSSCT00000039729)	ENSSSCT00000042203	-296
7	53020339	53020898	0.00299774	intron (ENSSSCT00000002033, intron 4 of 40)	ENSSSCT00000051912	61900
15	110874351	110874716	0.00304096	exon (ENSSSCT00000079627, exon 1 of 9)	ENSSSCT00000031210	241
2	10614082	10614513	0.00304096	promoter-TSS (ENSSSCT00000032280)	ENSSSCT00000032280	-156
2	8354846	8355169	0.00304096	promoter-TSS (ENSSSCT00000050958)	ENSSSCT00000014266	-109
8	31134105	31134506	0.00304096	promoter-TSS (ENSSSCT00000047810)	ENSSSCT00000029818	15
8	96924789	96925083	0.00304096	promoter-TSS (ENSSSCT00000074096)	ENSSSCT00000009940	-9
5	40190825	40191108	0.00306068	Intergenic	ENSSSCT00000029447	232050
6	10328390	10328820	0.00312699	intron (ENSSSCT00000089348, intron 6 of 10)	ENSSSCT00000061527	-76321
18	9581160	9581685	0.00314703	promoter-TSS (ENSSSCT00000017965)	ENSSSCT00000017965	38
3	86179937	86180414	0.00314703	promoter-TSS (ENSSSCT00000077786)	ENSSSCT00000059418	39
6	88530002	88530444	0.00314703	promoter-TSS (ENSSSCT00000028289)	ENSSSCT00000028289	-164
9	8198978	8199524	0.00314703	promoter-TSS (ENSSSCT00000048524)	ENSSSCT00000079270	-152
1	225042252	225042610	0.00317792	promoter-TSS (ENSSSCT00000005795)	ENSSSCT00000049032	-856
12	52749859	52750197	0.00317792	TTS (ENSSSCT00000064953)	ENSSSCT00000029953	555
13	26108172	26108661	0.00317792	exon (ENSSSCT00000031101, exon 2 of 4)	ENSSSCT00000056387	-1773
1	191350099	191350430	0.00317848	Intergenic	ENSSSCT00000005627	28265
2	7390722	7391257	0.00318654	promoter-TSS (ENSSSCT00000059278)	ENSSSCT00000046089	-75
6	83089586	83090150	0.00318654	promoter-TSS (ENSSSCT00000026086)	ENSSSCT00000067780	-120
15	59312969	59313404	0.00321837	intron (ENSSSCT00000069886, intron 1 of 19)	ENSSSCT00000069886	694
12	14881626	14882230	0.00322695	promoter-TSS (ENSSSCT00000018811)	ENSSSCT00000086540	5
8	1216807	1217165	0.00322695	promoter-TSS (ENSSSCT00000027138)	ENSSSCT00000027138	-261
1	10233050	10233249	0.00323162	Intergenic	ENSSSCT00000004493	-5202
1	17137927	17138134	0.00323162	exon (ENSSSCT00000081067, exon 2 of 9)	ENSSSCT00000024450	347
1	74078748	74078947	0.00323162	promoter-TSS (ENSSSCT00000057333)	ENSSSCT00000057333	-265
10	725378	725577	0.00323162	promoter-TSS (ENSSSCT00000057180)	ENSSSCT00000057180	-12
11	67947478	67947677	0.00323162	intron (ENSSSCT00000065095, intron 4 of 55)	ENSSSCT00000042343	1836
13	138151484	138151707	0.00323162	promoter-TSS (ENSSSCT00000069891)	ENSSSCT00000052238	48
13	40356914	40357134	0.00323162	intron (ENSSSCT00000044053, intron 1 of 4)	ENSSSCT00000044053	12737
14	448332	448598	0.00323162	Intergenic	ENSSSCT00000089087	14440
14	46874894	46875093	0.00323162	promoter-TSS (ENSSSCT00000045628)	ENSSSCT00000010951	-39
14	89778656	89778855	0.00323162	intron (ENSSSCT00000044740, intron 5 of 6)	ENSSSCT00000011371	-23711
15	48656270	48656490	0.00323162	intron (ENSSSCT00000083533, intron 7 of 7)	ENSSSCT00000017235	6104
3	96872108	96872339	0.00323162	promoter-TSS (ENSSSCT00000009261)	ENSSSCT00000009261	69
4	16101193	16101425	0.00323162	Intergenic	ENSSSCT00000006567	-5621
4	5428323	5428522	0.00323162	Intergenic	ENSSSCT00000087070	30159
7	121376175	121376374	0.00323162	intron (ENSSSCT00000041419, intron 6 of 8)	ENSSSCT00000056632	41798
7	61108447	61108646	0.00323162	exon (ENSSSCT00000002164, exon 2 of 4)	ENSSSCT00000002164	153
7	65600146	65600345	0.00323162	Intergenic	ENSSSCT00000074245	-85581
8	29489583	29489782	0.00323162	intron (ENSSSCT00000090290, intron 6 of 19)	ENSSSCT00000081837	6358
8	8926461	8926660	0.00323162	intron (ENSSSCT00000024451, intron 9 of 10)	ENSSSCT00000059086	198660
9	124141791	124141990	0.00323162	promoter-TSS (ENSSSCT00000034683)	ENSSSCT00000034683	-77
12	53438936	53439158	0.00331187	intron (ENSSSCT00000027166, intron 5 of 6)	ENSSSCT00000027166	15076
17	63467473	63467748	0.00331187	Intergenic	ENSSSCT00000037320	-105621
1	5465200	5465620	0.00335696	promoter-TSS (ENSSSCT00000057322)	ENSSSCT00000075359	-101
1	74180865	74181295	0.00335696	promoter-TSS (ENSSSCT00000004845)	ENSSSCT00000004845	4
12	43032584	43032869	0.00335696	promoter-TSS (ENSSSCT00000038476)	ENSSSCT00000043030	-82
13	32106810	32107226	0.00335696	promoter-TSS (ENSSSCT00000077819)	ENSSSCT00000012462	-59
17	31705164	31705458	0.00335696	promoter-TSS (ENSSSCT00000090024)	ENSSSCT00000090024	-94
18	47297999	47298327	0.00335696	promoter-TSS (ENSSSCT00000090659)	ENSSSCT00000090659	-165
2	74134596	74134845	0.00335696	promoter-TSS (ENSSSCT00000054763)	ENSSSCT00000030752	-23
8	33729298	33729612	0.00335696	Intergenic	ENSSSCT00000079011	-14077
2	135283465	135284108	0.00342766	promoter-TSS (ENSSSCT00000025744)	ENSSSCT00000025744	-107
3	92227431	92227898	0.00350149	promoter-TSS (ENSSSCT00000056003)	ENSSSCT00000056003	27
6	98254213	98254666	0.00350149	promoter-TSS (ENSSSCT00000073065)	ENSSSCT00000061774	-151
1	84077025	84077231	0.00359365	Intergenic	ENSSSCT00000088585	96314
10	47840344	47840548	0.00359365	intron (ENSSSCT00000062939, intron 2 of 23)	ENSSSCT00000085983	-78421
7	21606229	21606428	0.00359365	intron (ENSSSCT00000061257, intron 1 of 1)	ENSSSCT00000050449	10450
8	137405533	137405732	0.00359365	intron (ENSSSCT00000037853, intron 2 of 5)	ENSSSCT00000066717	-55137
X	16176013	16176212	0.00359365	intron (ENSSSCT00000035066, intron 2 of 18)	ENSSSCT00000035066	3062
1	75170301	75170696	0.00363963	promoter-TSS (ENSSSCT00000077503)	ENSSSCT00000082801	-119
2	144929667	144929887	0.00363963	intron (ENSSSCT00000044530, intron 2 of 9)	ENSSSCT00000049496	1260
2	16772054	16772266	0.00363963	promoter-TSS (ENSSSCT00000078007)	ENSSSCT00000014497	-48
4	93733743	93734027	0.00363963	promoter-TSS (ENSSSCT00000007106)	ENSSSCT00000045139	-32
6	37943907	37944267	0.00363963	promoter-TSS (ENSSSCT00000023228)	ENSSSCT00000040826	-40
6	74809309	74809550	0.00363963	promoter-TSS (ENSSSCT00000087169)	ENSSSCT00000003847	4
6	92349864	92350163	0.00363963	promoter-TSS (ENSSSCT00000004032)	ENSSSCT00000004032	-60
7	27206585	27206847	0.00363963	intron (ENSSSCT00000072248, intron 1 of 3)	ENSSSCT00000072248	577
7	68143318	68143596	0.00363963	Intergenic	ENSSSCT00000032499	37231
8	118202591	118202894	0.00363963	promoter-TSS (ENSSSCT00000065206)	ENSSSCT00000010039	-298
13	179913840	179914312	0.0036478	promoter-TSS (ENSSSCT00000069075)	ENSSSCT00000069075	63
7	13466300	13466686	0.0036478	promoter-TSS (ENSSSCT00000062257)	ENSSSCT00000044984	11
17	28679206	28679657	0.00370455	promoter-TSS (ENSSSCT00000064011)	ENSSSCT00000057736	-200
7	114573738	114574352	0.00370455	promoter-TSS (ENSSSCT00000089312)	ENSSSCT00000089312	-39
9	17297265	17297832	0.00370455	promoter-TSS (ENSSSCT00000016256)	ENSSSCT00000043941	-313
10	24944412	24944680	0.00372012	exon (ENSSSCT00000078081, exon 1 of 1)	ENSSSCT00000078081	692
1	109826077	109826310	0.00374551	exon (ENSSSCT00000056300, exon 1 of 1)	ENSSSCT00000056300	212
10	18302919	18303163	0.00374551	intron (ENSSSCT00000032490, intron 10 of 11)	ENSSSCT00000038187	248091
10	46647106	46647308	0.00374551	promoter-TSS (ENSSSCT00000022429)	ENSSSCT00000022429	27
13	182227966	182228179	0.00374551	promoter-TSS (ENSSSCT00000077168)	ENSSSCT00000013145	-101
15	47046361	47046602	0.00374551	exon (ENSSSCT00000060249, exon 2 of 12)	ENSSSCT00000060249	212
16	68359273	68359547	0.00374551	promoter-TSS (ENSSSCT00000018583)	ENSSSCT00000018583	91
17	26120179	26120378	0.00374551	promoter-TSS (ENSSSCT00000064166)	ENSSSCT00000078543	69
18	54615144	54615366	0.00374551	Intergenic	ENSSSCT00000068275	-14201
18	6443614	6443862	0.00374551	intron (ENSSSCT00000038872, intron 1 of 2)	ENSSSCT00000052261	-6218
2	138288328	138288545	0.00374551	intron (ENSSSCT00000067368, intron 1 of 5)	ENSSSCT00000036284	302
2	61062854	61063053	0.00374551	promoter-TSS (ENSSSCT00000015139)	ENSSSCT00000015139	-68
2	88903017	88903274	0.00374551	intron (ENSSSCT00000072280, intron 2 of 12)	ENSSSCT00000015423	58324
3	114250356	114250555	0.00374551	promoter-TSS (ENSSSCT00000047116)	ENSSSCT00000047116	-159
3	67611081	67611348	0.00374551	promoter-TSS (ENSSSCT00000081767)	ENSSSCT00000081767	88
4	119255632	119255864	0.00374551	exon (ENSSSCT00000007531, exon 1 of 8)	ENSSSCT00000052944	129
5	46574574	46574807	0.00374551	intron (ENSSSCT00000029783, intron 1 of 13)	ENSSSCT00000029783	57883
7	46945979	46946178	0.00374551	intron (ENSSSCT00000032492, intron 2 of 8)	ENSSSCT00000049196	-13128
8	123504256	123504465	0.00374551	intron (ENSSSCT00000066901, intron 1 of 2)	ENSSSCT00000066901	3740
9	41480863	41481115	0.00374551	promoter-TSS (ENSSSCT00000043342)	ENSSSCT00000065055	-4
9	78218554	78218810	0.00374551	exon (ENSSSCT00000016718, exon 1 of 8)	ENSSSCT00000016718	376
18	55407634	55407866	0.00376047	intron (ENSSSCT00000058623, intron 9 of 27)	ENSSSCT00000084209	-87157
1	269676114	269676375	0.00379026	intron (ENSSSCT00000067721, intron 1 of 1)	ENSSSCT00000072132	-44667
7	78476419	78476761	0.00379026	exon (ENSSSCT00000002394, exon 3 of 6)	ENSSSCT00000002394	6251
10	40741716	40741916	0.00384619	promoter-TSS (ENSSSCT00000085015)	ENSSSCT00000085015	-27
14	37582664	37582990	0.00384619	promoter-TSS (ENSSSCT00000010813)	ENSSSCT00000010813	5
16	4062956	4063283	0.00384619	promoter-TSS (ENSSSCT00000090714)	ENSSSCT00000090714	48
2	80367921	80368152	0.00384619	exon (ENSSSCT00000015332, exon 2 of 11)	ENSSSCT00000015332	375
2	82304081	82304309	0.00384619	Intergenic	ENSSSCT00000090243	-15601
3	111747923	111748220	0.00384619	promoter-TSS (ENSSSCT00000056355)	ENSSSCT00000089652	-43
3	81285710	81286039	0.00384619	exon (ENSSSCT00000039117, exon 4 of 5)	ENSSSCT00000039117	81743
4	90214901	90215176	0.00384619	promoter-TSS (ENSSSCT00000061610)	ENSSSCT00000061610	-33
5	15347436	15347775	0.00384619	promoter-TSS (ENSSSCT00000000212)	ENSSSCT00000042119	-28
5	68167745	68168039	0.00384619	promoter-TSS (ENSSSCT00000000818)	ENSSSCT00000000818	-220
6	167642358	167642627	0.00384619	promoter-TSS (ENSSSCT00000026209)	ENSSSCT00000026209	-183
6	44670296	44670516	0.00384619	intron (ENSSSCT00000067987, intron 4 of 5)	ENSSSCT00000071887	1702
6	84467430	84467708	0.00384619	promoter-TSS (ENSSSCT00000085400)	ENSSSCT00000038891	-165
7	2446239	2446457	0.00384619	promoter-TSS (ENSSSCT00000001092)	ENSSSCT00000001092	-72
7	46185212	46185541	0.00384619	promoter-TSS (ENSSSCT00000061228)	ENSSSCT00000088813	96
9	12065451	12065754	0.00384619	promoter-TSS (ENSSSCT00000016234)	ENSSSCT00000016234	56
9	27812172	27812436	0.00384619	promoter-TSS (ENSSSCT00000016328)	ENSSSCT00000016328	-82
9	66316044	66316318	0.00384619	promoter-TSS (ENSSSCT00000028838)	ENSSSCT00000028838	-94
14	89620887	89621563	0.00391177	intron (ENSSSCT00000011368, intron 7 of 7)	ENSSSCT00000011367	-43922
14	30792770	30792973	0.00391208	promoter-TSS (ENSSSCT00000010744)	ENSSSCT00000010744	-128
15	95248398	95248619	0.00391208	promoter-TSS (ENSSSCT00000026187)	ENSSSCT00000069352	-129
2	69029668	69029885	0.00391208	promoter-TSS (ENSSSCT00000038267)	ENSSSCT00000038267	-142
3	10609802	10610084	0.00391208	promoter-TSS (ENSSSCT00000061936)	ENSSSCT00000061936	88
3	58575033	58575316	0.00391208	promoter-TSS (ENSSSCT00000041504)	ENSSSCT00000030815	-9
6	13011666	13011870	0.00391208	promoter-TSS (ENSSSCT00000079660)	ENSSSCT00000079660	-92
6	1703235	1703472	0.00391208	intron (ENSSSCT00000002944, intron 3 of 6)	ENSSSCT00000019747	-36470
6	17854642	17854841	0.00391208	intron (ENSSSCT00000058839, intron 19 of 21)	ENSSSCT00000064379	-1730
6	42574653	42574852	0.00391208	exon (ENSSSCT00000051611, exon 1 of 3)	ENSSSCT00000051611	681
6	72579391	72579590	0.00391208	intron (ENSSSCT00000003817, intron 2 of 6)	ENSSSCT00000076092	19055
6	81722327	81722591	0.00391208	promoter-TSS (ENSSSCT00000053990)	ENSSSCT00000054366	433
8	20254849	20255072	0.00391208	promoter-TSS (ENSSSCT00000047454)	ENSSSCT00000047454	19
8	39408634	39408859	0.00391208	Intergenic	ENSSSCT00000067652	117724
9	8840137	8840339	0.00391208	exon (ENSSSCT00000030806, exon 1 of 2)	ENSSSCT00000030806	1117
6	64206867	64207237	0.00400907	intron (ENSSSCT00000048902, intron 1 of 8)	ENSSSCT00000048902	19023
13	140831	141247	0.00407225	Intergenic	ENSSSCT00000085232	148431
13	197161861	197162151	0.00408043	promoter-TSS (ENSSSCT00000063351)	ENSSSCT00000075153	-108
2	75098565	75098802	0.00408043	promoter-TSS (ENSSSCT00000057853)	ENSSSCT00000045156	-126
11	76751822	76752207	0.00409953	Intergenic	ENSSSCT00000081541	78391
2	77211960	77212159	0.00416106	promoter-TSS (ENSSSCT00000049144)	ENSSSCT00000014676	-189
5	48508405	48508777	0.00416106	promoter-TSS (ENSSSCT00000042185)	ENSSSCT00000042185	-199
7	38216267	38216598	0.00416106	intron (ENSSSCT00000001852, intron 2 of 6)	ENSSSCT00000001852	3369
11	25064561	25064760	0.00425174	promoter-TSS (ENSSSCT00000055668)	ENSSSCT00000055668	4
12	11031964	11032163	0.00425174	intron (ENSSSCT00000033236, intron 2 of 41)	ENSSSCT00000035633	-13422
2	52134588	52134787	0.00425174	Intergenic	ENSSSCT00000039000	-42257
6	130107786	130107985	0.00425174	Intergenic	ENSSSCT00000086011	-26677
12	32891636	32891910	0.00427273	exon (ENSSSCT00000048427, exon 1 of 1)	ENSSSCT00000048427	452
14	86766695	86766910	0.00427273	intron (ENSSSCT00000011333, intron 6 of 15)	ENSSSCT00000070290	-56703
3	59167707	59167935	0.00427273	intron (ENSSSCT00000038133, intron 1 of 5)	ENSSSCT00000043308	699
3	67531432	67531732	0.00427273	intron (ENSSSCT00000073230, intron 2 of 2)	ENSSSCT00000077021	13194
6	44280126	44280554	0.00427273	intron (ENSSSCT00000042052, intron 4 of 7)	ENSSSCT00000042052	39083
6	83933627	83933827	0.00427273	intron (ENSSSCT00000044862, intron 13 of 20)	ENSSSCT00000089337	13790
5	90234864	90235091	0.00440162	intron (ENSSSCT00000078953, intron 19 of 29)	ENSSSCT00000078953	66735
14	7344251	7344481	0.00442759	TTS (ENSSSCT00000029798)	ENSSSCT00000029798	14918
15	135523490	135523819	0.00442759	intron (ENSSSCT00000060683, intron 2 of 21)	ENSSSCT00000017770	-29115
3	42667222	42667497	0.00442759	intron (ENSSSCT00000056501, intron 1 of 4)	ENSSSCT00000056501	5643
6	38774518	38774794	0.00442759	Intergenic	ENSSSCT00000047125	-137762
6	144943787	144944276	0.00450185	promoter-TSS (ENSSSCT00000064872)	ENSSSCT00000064872	2
10	19046074	19046734	0.00454256	promoter-TSS (ENSSSCT00000071325)	ENSSSCT00000071325	24
1	120291208	120291430	0.00469124	intron (ENSSSCT00000056758, intron 35 of 41)	ENSSSCT00000063778	-76348
1	139739520	139739719	0.00469124	intron (ENSSSCT00000037748, intron 2 of 2)	ENSSSCT00000081610	-34395
1	35696619	35696818	0.00469124	promoter-TSS (ENSSSCT00000061940)	ENSSSCT00000048885	-347
1	80121356	80121555	0.00469124	intron (ENSSSCT00000004898, intron 2 of 5)	ENSSSCT00000004898	122342
11	15141080	15141322	0.00469124	exon (ENSSSCT00000073814, exon 1 of 2)	ENSSSCT00000073814	2024
11	66948865	66949093	0.00469124	Intergenic	ENSSSCT00000053863	-12261
12	20426948	20427147	0.00469124	intron (ENSSSCT00000018944, intron 1 of 23)	ENSSSCT00000018944	19528
12	7491709	7491908	0.00469124	Intergenic	ENSSSCT00000070730	-83836
13	28548121	28548320	0.00469124	intron (ENSSSCT00000076874, intron 3 of 18)	ENSSSCT00000078345	19252
13	57037413	57037612	0.00469124	Intergenic	ENSSSCT00000020982	-128761
14	109644974	109645173	0.00469124	TTS (ENSSSCT00000090169)	ENSSSCT00000090169	5436
14	124737678	124737877	0.00469124	Intergenic	ENSSSCT00000084382	15828
15	101601182	101601409	0.00469124	promoter-TSS (ENSSSCT00000017510)	ENSSSCT00000079887	-342
15	19640479	19640684	0.00469124	intron (ENSSSCT00000017107, intron 1 of 1)	ENSSSCT00000040367	117753
15	39713093	39713296	0.00469124	intron (ENSSSCT00000017173, intron 1 of 8)	ENSSSCT00000017173	302
15	92596369	92596568	0.00469124	Intergenic	ENSSSCT00000090859	-25631
16	1036909	1037108	0.00469124	intron (ENSSSCT00000079807, intron 3 of 22)	ENSSSCT00000055921	69471
16	23900635	23900834	0.00469124	intron (ENSSSCT00000062781, intron 4 of 28)	ENSSSCT00000089392	-140833
18	6664995	6665194	0.00469124	intron (ENSSSCT00000076054, intron 2 of 3)	ENSSSCT00000076054	25442
3	111396410	111396609	0.00469124	intron (ENSSSCT00000056657, intron 7 of 7)	ENSSSCT00000042508	42198
4	69420885	69421084	0.00469124	Intergenic	ENSSSCT00000079158	24316
6	126224488	126224687	0.00469124	Intergenic	ENSSSCT00000044988	-140889
6	2137272	2137471	0.00469124	Intergenic	ENSSSCT00000083945	-5395
8	131874077	131874276	0.00469124	intron (ENSSSCT00000073192, intron 2 of 8)	ENSSSCT00000010103	-13953
9	116170794	116170993	0.00469124	intron (ENSSSCT00000050920, intron 4 of 4)	ENSSSCT00000050920	21475
9	50532064	50532263	0.00469124	intron (ENSSSCT00000028370, intron 9 of 13)	ENSSSCT00000051882	-7535
1	184378935	184379287	0.00470756	promoter-TSS (ENSSSCT00000089298)	ENSSSCT00000084286	11
10	68565867	68566166	0.00470756	promoter-TSS (ENSSSCT00000023947)	ENSSSCT00000023947	-10
13	196925472	196925791	0.00470756	promoter-TSS (ENSSSCT00000086524)	ENSSSCT00000086524	-73
15	95513254	95513603	0.00470756	promoter-TSS (ENSSSCT00000017481)	ENSSSCT00000066240	48
2	135539066	135539479	0.00470756	intron (ENSSSCT00000015616, intron 9 of 16)	ENSSSCT00000015617	3195
4	93926379	93926605	0.00470756	intron (ENSSSCT00000007115, intron 3 of 14)	ENSSSCT00000058700	-15628
5	74880980	74881337	0.00470756	promoter-TSS (ENSSSCT00000000865)	ENSSSCT00000045088	7
1	164753071	164753271	0.00471279	exon (ENSSSCT00000082631, exon 2 of 2)	ENSSSCT00000076341	1236
1	75538324	75538550	0.00471279	intron (ENSSSCT00000004874, intron 5 of 6)	ENSSSCT00000053925	10325
10	11861073	11861349	0.00471279	exon (ENSSSCT00000086083, exon 2 of 3)	ENSSSCT00000086083	1071
14	140703101	140703316	0.00471279	promoter-TSS (ENSSSCT00000074017)	ENSSSCT00000074017	-192
14	32627819	32628055	0.00471279	intron (ENSSSCT00000010777, intron 1 of 7)	ENSSSCT00000010777	4629
16	71297479	71297680	0.00471279	intron (ENSSSCT00000038847, intron 1 of 3)	ENSSSCT00000059335	-21501
17	60015733	60016005	0.00471279	Intergenic	ENSSSCT00000072634	21527
2	130336448	130336763	0.00471279	exon (ENSSSCT00000052114, exon 6 of 25)	ENSSSCT00000015573	-107012
2	2427088	2427319	0.00471279	intron (ENSSSCT00000085606, intron 5 of 7)	ENSSSCT00000085606	15247
3	105084264	105084573	0.00471279	Intergenic	ENSSSCT00000068605	366669
4	104151750	104151951	0.00471279	exon (ENSSSCT00000088892, exon 8 of 13)	ENSSSCT00000007383	-18033
4	8834762	8834961	0.00471279	intron (ENSSSCT00000006536, intron 1 of 14)	ENSSSCT00000030500	-160491
6	121302336	121302535	0.00471279	intron (ENSSSCT00000062256, intron 1 of 13)	ENSSSCT00000063081	78415
6	34548507	34548706	0.00471279	exon (ENSSSCT00000031919, exon 5 of 21)	ENSSSCT00000031919	15545
6	40725469	40725670	0.00471279	intron (ENSSSCT00000052961, intron 6 of 6)	ENSSSCT00000090077	55108
2	27421139	27421587	0.00473635	intron (ENSSSCT00000083438, intron 1 of 21)	ENSSSCT00000085434	-54812
1	127237974	127238508	0.00474107	promoter-TSS (ENSSSCT00000079989)	ENSSSCT00000079989	24
13	146229851	146230229	0.00474107	promoter-TSS (ENSSSCT00000013042)	ENSSSCT00000013042	-124
4	98733815	98734183	0.00474107	promoter-TSS (ENSSSCT00000049663)	ENSSSCT00000064242	297
8	1038968	1039288	0.00474107	promoter-TSS (ENSSSCT00000091592)	ENSSSCT00000091592	-1
17	63386874	63387330	0.00480456	Intergenic	ENSSSCT00000037320	-25113
9	7202453	7202796	0.00494515	promoter-TSS (ENSSSCT00000082229)	ENSSSCT00000066369	-832
1	164155407	164155652	0.00502963	intron (ENSSSCT00000052344, intron 1 of 24)	ENSSSCT00000064802	-20873
1	33444603	33444827	0.00502963	Intergenic	ENSSSCT00000004645	-25682
13	198145650	198145865	0.00502963	intron (ENSSSCT00000042623, intron 1 of 7)	ENSSSCT00000091514	-7055
14	132091017	132091218	0.00502963	intron (ENSSSCT00000011709, intron 4 of 9)	ENSSSCT00000072215	-40892
16	77927197	77927398	0.00502963	Intergenic	ENSSSCT00000085739	-80438
3	42936348	42936638	0.00502963	intron (ENSSSCT00000044353, intron 12 of 19)	ENSSSCT00000036891	-52141
5	26867589	26867808	0.00502963	Intergenic	ENSSSCT00000086922	38667
8	75402376	75402616	0.00502963	Intergenic	ENSSSCT00000071009	18518
9	52564941	52565140	0.00502963	intron (ENSSSCT00000016577, intron 2 of 9)	ENSSSCT00000016577	20987
8	110201751	110201999	0.00503	exon (ENSSSCT00000049808, exon 1 of 1)	ENSSSCT00000049808	714
8	130347770	130348001	0.00503	exon (ENSSSCT00000010082, exon 31 of 31)	ENSSSCT00000010083	-16681
1	146912678	146912877	0.00509006	Intergenic	ENSSSCT00000067692	-143361
1	253988141	253988340	0.00509006	intron (ENSSSCT00000022931, intron 2 of 5)	ENSSSCT00000022931	12267
11	67501349	67501548	0.00509006	intron (ENSSSCT00000010428, intron 3 of 11)	ENSSSCT00000088191	23308
13	136678065	136678265	0.00509006	intron (ENSSSCT00000012981, intron 3 of 29)	ENSSSCT00000038993	-124931
15	118040961	118041195	0.00509006	Intergenic	ENSSSCT00000070425	-63622
15	347327	347526	0.00509006	intron (ENSSSCT00000051892, intron 2 of 13)	ENSSSCT00000086508	-2162
16	52662258	52662457	0.00509006	Intergenic	ENSSSCT00000076120	-41868
2	11689399	11689598	0.00509006	promoter-TSS (ENSSSCT00000014338)	ENSSSCT00000014338	-37
2	117742872	117743083	0.00509006	exon (ENSSSCT00000079868, exon 3 of 3)	ENSSSCT00000079868	4116
3	115164947	115165178	0.00509006	intron (ENSSSCT00000044456, intron 1 of 13)	ENSSSCT00000009404	12405
3	57062340	57062539	0.00509006	Intergenic	ENSSSCT00000009477	-56051
4	11764556	11764755	0.00509006	intron (ENSSSCT00000071968, intron 1 of 1)	ENSSSCT00000080071	-81631
6	102364305	102364505	0.00509006	intron (ENSSSCT00000056736, intron 1 of 14)	ENSSSCT00000056736	31002
6	21011870	21012104	0.00509006	intron (ENSSSCT00000077828, intron 1 of 1)	ENSSSCT00000077828	34323
7	120292519	120292781	0.00509006	intron (ENSSSCT00000080767, intron 1 of 3)	ENSSSCT00000088847	3087
8	118689404	118689610	0.00509006	Intergenic	ENSSSCT00000040082	84105
8	39077062	39077261	0.00509006	Intergenic	ENSSSCT00000009667	71586
9	135812745	135813013	0.00509006	exon (ENSSSCT00000081633, exon 1 of 1)	ENSSSCT00000081633	788
9	2329942	2330141	0.00509006	promoter-TSS (ENSSSCT00000085481)	ENSSSCT00000085481	-216
9	76583563	76583818	0.00509006	intron (ENSSSCT00000079357, intron 2 of 2)	ENSSSCT00000087785	21329
9	90980481	90980680	0.00509006	intron (ENSSSCT00000055333, intron 24 of 28)	ENSSSCT00000040966	-29348
2	5745142	5745584	0.00511686	promoter-TSS (ENSSSCT00000053522)	ENSSSCT00000014136	-101
6	120669916	120670331	0.00511686	promoter-TSS (ENSSSCT00000048090)	ENSSSCT00000028255	-95
7	86124385	86124781	0.00511686	promoter-TSS (ENSSSCT00000089316)	ENSSSCT00000081970	-157
3	5630856	5631150	0.00514516	Intergenic	ENSSSCT00000086795	-41567
14	139670066	139670377	0.00517944	Intergenic	ENSSSCT00000078783	-18896
15	32663272	32663580	0.00517944	intron (ENSSSCT00000017146, intron 1 of 14)	ENSSSCT00000081001	63185
6	9960695	9961032	0.00517944	intron (ENSSSCT00000002989, intron 8 of 9)	ENSSSCT00000022076	-24847
3	71180564	71180941	0.00518	intron (ENSSSCT00000078536, intron 13 of 57)	ENSSSCT00000069871	57016
14	24341458	24341866	0.00526683	promoter-TSS (ENSSSCT00000010686)	ENSSSCT00000045895	104
14	72555417	72555688	0.00526683	TTS (ENSSSCT00000040027)	ENSSSCT00000073552	-3304
2	140324342	140324615	0.00526683	promoter-TSS (ENSSSCT00000073980)	ENSSSCT00000073980	-53
6	43933585	43934003	0.00526683	promoter-TSS (ENSSSCT00000003173)	ENSSSCT00000058743	7
7	111536330	111536702	0.00526683	Intergenic	ENSSSCT00000039356	-84623
8	121409485	121409798	0.00526683	promoter-TSS (ENSSSCT00000032198)	ENSSSCT00000069845	-90
1	169596403	169596885	0.00532175	promoter-TSS (ENSSSCT00000036741)	ENSSSCT00000005491	-8
8	3828255	3828644	0.00532175	promoter-TSS (ENSSSCT00000038401)	ENSSSCT00000029880	-231
9	114916594	114917113	0.00532175	promoter-TSS (ENSSSCT00000083132)	ENSSSCT00000016869	-2
5	3468692	3469123	0.00539057	Intergenic	ENSSSCT00000067695	6053
10	17559383	17559826	0.00548775	intron (ENSSSCT00000011901, intron 1 of 5)	ENSSSCT00000085981	249
10	48939347	48939703	0.00548775	promoter-TSS (ENSSSCT00000050059)	ENSSSCT00000012105	15
7	65302694	65303074	0.00548775	Intergenic	ENSSSCT00000088173	-11444
11	35870790	35871613	0.00555574	Intergenic	ENSSSCT00000020524	-119213
1	268894163	268894372	0.00575158	promoter-TSS (ENSSSCT00000006215)	ENSSSCT00000006215	-9
15	110363388	110363587	0.00575158	intron (ENSSSCT00000031970, intron 2 of 4)	ENSSSCT00000064987	15818
15	120224561	120224760	0.00575158	intron (ENSSSCT00000017622, intron 1 of 1)	ENSSSCT00000017622	2287
15	130939577	130939794	0.00575158	promoter-TSS (ENSSSCT00000037953)	ENSSSCT00000037953	-110
15	57388939	57389138	0.00575158	intron (ENSSSCT00000057190, intron 3 of 6)	ENSSSCT00000057190	29750
18	37708617	37708816	0.00575158	promoter-TSS (ENSSSCT00000057595)	ENSSSCT00000057595	-141
2	16343918	16344117	0.00575158	promoter-TSS (ENSSSCT00000061805)	ENSSSCT00000051529	-122
2	82101437	82101707	0.00575158	intron (ENSSSCT00000073706, intron 1 of 23)	ENSSSCT00000083762	191
3	110474437	110474637	0.00575158	promoter-TSS (ENSSSCT00000075259)	ENSSSCT00000009345	190
3	47470553	47470752	0.00575158	promoter-TSS (ENSSSCT00000008912)	ENSSSCT00000008912	-54
3	6442268	6442467	0.00575158	promoter-TSS (ENSSSCT00000054479)	ENSSSCT00000054479	-24
3	9127329	9127528	0.00575158	intron (ENSSSCT00000008419, intron 3 of 13)	ENSSSCT00000008421	71028
6	13187522	13187721	0.00575158	intron (ENSSSCT00000045770, intron 1 of 20)	ENSSSCT00000058633	194
7	15643740	15643939	0.00575158	promoter-TSS (ENSSSCT00000001173)	ENSSSCT00000001173	-147
9	124847408	124847607	0.00575158	promoter-TSS (ENSSSCT00000086994)	ENSSSCT00000016950	601
14	73296459	73296726	0.005802	promoter-TSS (ENSSSCT00000087502)	ENSSSCT00000087502	7
15	101373900	101374134	0.005802	promoter-TSS (ENSSSCT00000083792)	ENSSSCT00000083792	-62
17	26381097	26381366	0.005802	promoter-TSS (ENSSSCT00000066853)	ENSSSCT00000065326	4
2	66370674	66371000	0.005802	Intergenic	ENSSSCT00000014994	41793
3	7571784	7572103	0.005802	promoter-TSS (ENSSSCT00000068672)	ENSSSCT00000068672	40
4	3061545	3061808	0.005802	Intergenic	ENSSSCT00000006514	-3560
6	71253515	71253761	0.005802	promoter-TSS (ENSSSCT00000070520)	ENSSSCT00000029896	-130
7	1656758	1656996	0.005802	promoter-TSS (ENSSSCT00000031472)	ENSSSCT00000001102	435
14	108822662	108823044	0.00600007	promoter-TSS (ENSSSCT00000049238)	ENSSSCT00000049238	41
18	20653529	20653926	0.00600007	promoter-TSS (ENSSSCT00000087594)	ENSSSCT00000088115	-137
2	51036499	51036793	0.0060054	Intergenic	ENSSSCT00000085487	62296
2	71060283	71060637	0.0060054	Intergenic	ENSSSCT00000014849	-12210
2	77340151	77340350	0.0060054	intron (ENSSSCT00000056058, intron 4 of 6)	ENSSSCT00000089963	246
5	985864	986100	0.0060054	Intergenic	ENSSSCT00000075590	-18361
5	76876548	76877030	0.00604455	promoter-TSS (ENSSSCT00000000875)	ENSSSCT00000045668	-166
9	49986794	49987431	0.00604455	promoter-TSS (ENSSSCT00000016508)	ENSSSCT00000016506	-14
7	36410374	36410799	0.0062438	promoter-TSS (ENSSSCT00000001792)	ENSSSCT00000001792	91
10	68528667	68528937	0.00625038	promoter-TSS (ENSSSCT00000040160)	ENSSSCT00000048504	-121
13	180570774	180571128	0.00625038	promoter-TSS (ENSSSCT00000022689)	ENSSSCT00000082618	-18
13	2840775	2841073	0.00625038	promoter-TSS (ENSSSCT00000076462)	ENSSSCT00000030048	-22
17	41479444	41479659	0.00625038	promoter-TSS (ENSSSCT00000073972)	ENSSSCT00000073972	3
2	135305887	135306125	0.00625038	exon (ENSSSCT00000075742, exon 1 of 19)	ENSSSCT00000067403	154
2	39032728	39033045	0.00625038	promoter-TSS (ENSSSCT00000078387)	ENSSSCT00000078387	30
2	39828986	39829256	0.00625038	intron (ENSSSCT00000027648, intron 1 of 37)	ENSSSCT00000020414	2106
3	101957626	101957921	0.00625038	promoter-TSS (ENSSSCT00000041304)	ENSSSCT00000041304	96
4	101521645	101521893	0.00625038	promoter-TSS (ENSSSCT00000007359)	ENSSSCT00000007359	3
5	28880346	28880827	0.00628777	promoter-TSS (ENSSSCT00000040775)	ENSSSCT00000062705	37
6	47289849	47290227	0.00628777	exon (ENSSSCT00000049361, exon 1 of 7)	ENSSSCT00000049361	152
7	12117068	12117554	0.00628777	promoter-TSS (ENSSSCT00000001158)	ENSSSCT00000001158	71
12	27526456	27526811	0.00632038	promoter-TSS (ENSSSCT00000083012)	ENSSSCT00000083012	14
3	77293443	77293761	0.00632038	promoter-TSS (ENSSSCT00000075959)	ENSSSCT00000075959	94
4	95746580	95746804	0.00632038	promoter-TSS (ENSSSCT00000051089)	ENSSSCT00000051089	-748
8	38241278	38241612	0.00632038	promoter-TSS (ENSSSCT00000009651)	ENSSSCT00000075155	-153
1	28566084	28566510	0.00639736	promoter-TSS (ENSSSCT00000004605)	ENSSSCT00000060523	31
4	80190655	80191004	0.00639736	promoter-TSS (ENSSSCT00000042869)	ENSSSCT00000059279	-174
4	122956923	122957122	0.00642	Intergenic	ENSSSCT00000084899	-3765
1	158861699	158861898	0.00642047	exon (ENSSSCT00000038015, exon 1 of 17)	ENSSSCT00000090801	308
1	86164007	86164223	0.00642047	exon (ENSSSCT00000037914, exon 1 of 5)	ENSSSCT00000037914	218
10	19171015	19171254	0.00642047	intron (ENSSSCT00000011908, intron 3 of 5)	ENSSSCT00000085368	17344
10	28449291	28449490	0.00642047	intron (ENSSSCT00000084572, intron 3 of 5)	ENSSSCT00000069193	-6052
11	36040023	36040243	0.00642047	Intergenic	ENSSSCT00000020524	49719
11	602420	602639	0.00642047	intron (ENSSSCT00000063264, intron 4 of 7)	ENSSSCT00000063264	14326
12	47644737	47644936	0.00642047	intron (ENSSSCT00000043537, intron 1 of 6)	ENSSSCT00000040818	354
13	109662275	109662481	0.00642047	intron (ENSSSCT00000030826, intron 25 of 30)	ENSSSCT00000077905	-38591
13	157491013	157491285	0.00642047	promoter-TSS (ENSSSCT00000061429)	ENSSSCT00000061429	56
14	45924936	45925149	0.00642047	promoter-TSS (ENSSSCT00000026589)	ENSSSCT00000026589	-15
14	48275977	48276206	0.00642047	intron (ENSSSCT00000060735, intron 6 of 22)	ENSSSCT00000060735	10214
16	64081892	64082116	0.00642047	Intergenic	ENSSSCT00000084893	38287
17	35415635	35415834	0.00642047	promoter-TSS (ENSSSCT00000007909)	ENSSSCT00000007909	-375
2	145037510	145037709	0.00642047	intron (ENSSSCT00000077320, intron 1 of 2)	ENSSSCT00000077320	5341
2	15368983	15369182	0.00642047	promoter-TSS (ENSSSCT00000052671)	ENSSSCT00000052671	-227
2	40310467	40310672	0.00642047	promoter-TSS (ENSSSCT00000029801)	ENSSSCT00000029801	-181
2	65938718	65938917	0.00642047	promoter-TSS (ENSSSCT00000015025)	ENSSSCT00000015025	-57
2	78496791	78496990	0.00642047	exon (ENSSSCT00000015304, exon 14 of 14)	ENSSSCT00000015306	-18534
3	22586705	22586915	0.00642047	promoter-TSS (ENSSSCT00000042596)	ENSSSCT00000073346	-8
4	111293524	111293763	0.00642047	intron (ENSSSCT00000071683, intron 1 of 18)	ENSSSCT00000088337	-9700
5	39181183	39181382	0.00642047	Intergenic	ENSSSCT00000090337	-32224
5	86405414	86405673	0.00642047	intron (ENSSSCT00000074121, intron 3 of 4)	ENSSSCT00000047792	-75059
6	160298780	160299006	0.00642047	promoter-TSS (ENSSSCT00000004282)	ENSSSCT00000004282	-230
7	50118808	50119011	0.00642047	promoter-TSS (ENSSSCT00000002003)	ENSSSCT00000002003	-280
8	5890617	5890820	0.00642047	promoter-TSS (ENSSSCT00000026563)	ENSSSCT00000026563	-46
8	90171982	90172244	0.00642047	Intergenic	ENSSSCT00000090154	-370120
9	101414502	101414702	0.00642047	intron (ENSSSCT00000050948, intron 2 of 21)	ENSSSCT00000051208	-45330
14	21800677	21801143	0.00649445	intron (ENSSSCT00000079497, intron 1 of 6)	ENSSSCT00000062984	45768
1	198758373	198758600	0.00650978	Intergenic	ENSSSCT00000058045	48863
1	64459727	64460035	0.00650978	promoter-TSS (ENSSSCT00000004800)	ENSSSCT00000004800	27
12	23434758	23434968	0.00650978	promoter-TSS (ENSSSCT00000041415)	ENSSSCT00000041415	-539
14	94094679	94094907	0.00650978	promoter-TSS (ENSSSCT00000028498)	ENSSSCT00000074516	-89
15	15923528	15923786	0.00650978	promoter-TSS (ENSSSCT00000054881)	ENSSSCT00000054881	-24
16	30771811	30772056	0.00650978	Intergenic	ENSSSCT00000080459	99066
2	68677842	68678051	0.00650978	promoter-TSS (ENSSSCT00000056514)	ENSSSCT00000055150	146
2	79511912	79512160	0.00650978	promoter-TSS (ENSSSCT00000051858)	ENSSSCT00000051858	-11
3	113229228	113229427	0.00650978	promoter-TSS (ENSSSCT00000065664)	ENSSSCT00000066423	75
3	44433462	44433733	0.00650978	intron (ENSSSCT00000069125, intron 4 of 19)	ENSSSCT00000069125	20716
4	51701259	51701478	0.00650978	Intergenic	ENSSSCT00000006741	-72464
6	159854775	159854979	0.00650978	intron (ENSSSCT00000023805, intron 1 of 24)	ENSSSCT00000049292	281
6	55412488	55412687	0.00650978	promoter-TSS (ENSSSCT00000068011)	ENSSSCT00000068011	-590
7	47640910	47641131	0.00650978	promoter-TSS (ENSSSCT00000001963)	ENSSSCT00000067395	-142
8	4031186	4031420	0.00650978	Intergenic	ENSSSCT00000032549	64756
9	102782358	102782616	0.00650978	intron (ENSSSCT00000054468, intron 3 of 6)	ENSSSCT00000054468	3014
9	2141226	2141425	0.00650978	promoter-TSS (ENSSSCT00000042506)	ENSSSCT00000042506	73
18	4969191	4969687	0.00657554	Intergenic	ENSSSCT00000017889	11637
7	29694316	29694867	0.00657554	promoter-TSS (ENSSSCT00000001683)	ENSSSCT00000001683	-197
17	36669470	36669669	0.00677922	Intergenic	ENSSSCT00000056408	-12171
5	71547628	71547827	0.00677922	intron (ENSSSCT00000000848, intron 3 of 9)	ENSSSCT00000072405	28129
6	136806050	136806263	0.00677922	intron (ENSSSCT00000028573, intron 3 of 4)	ENSSSCT00000072443	47776
13	63497246	63497682	0.00679	intron (ENSSSCT00000044234, intron 2 of 3)	ENSSSCT00000056930	-98856
1	272711091	272711348	0.00679368	exon (ENSSSCT00000006308, exon 4 of 8)	ENSSSCT00000076747	8047
14	40109042	40109323	0.00679368	intron (ENSSSCT00000061580, intron 4 of 9)	ENSSSCT00000078379	23293
5	39802829	39803045	0.00679368	Intergenic	ENSSSCT00000029484	-58292
1	146335894	146336164	0.00687631	intron (ENSSSCT00000069916, intron 2 of 2)	ENSSSCT00000060511	56382
1	239975191	239975454	0.00687631	intron (ENSSSCT00000005915, intron 2 of 12)	ENSSSCT00000005915	25596
1	243532978	243533337	0.00687631	Intergenic	ENSSSCT00000077567	49167
13	124880236	124880533	0.00687631	Intergenic	ENSSSCT00000074151	20121
14	28806371	28806588	0.00687631	intron (ENSSSCT00000010703, intron 37 of 46)	ENSSSCT00000075968	25110
17	14919681	14919890	0.00687631	intron (ENSSSCT00000007715, intron 4 of 14)	ENSSSCT00000068606	-22217
18	8255233	8255539	0.00687631	intron (ENSSSCT00000017955, intron 8 of 8)	ENSSSCT00000017955	49862
3	12299409	12299682	0.00687631	intron (ENSSSCT00000085268, intron 6 of 8)	ENSSSCT00000087708	259449
3	5138372	5138602	0.00687631	intron (ENSSSCT00000077078, intron 11 of 14)	ENSSSCT00000089045	-6140
4	84313731	84314060	0.00687631	Intergenic	ENSSSCT00000048534	16721
5	43033851	43034229	0.00687631	Intergenic	ENSSSCT00000025036	-9166
9	42335231	42335613	0.00687631	Intergenic	ENSSSCT00000023761	131745
9	9920567	9920833	0.00687631	Intergenic	ENSSSCT00000060524	-17000
9	122870940	122871200	0.00688	Intergenic	ENSSSCT00000069303	-60738
1	143540744	143540974	0.00702083	promoter-TSS (ENSSSCT00000032440)	ENSSSCT00000032440	-296
13	131260335	131260673	0.00702083	Intergenic	ENSSSCT00000085282	-28471
13	157272490	157272854	0.00702083	promoter-TSS (ENSSSCT00000084999)	ENSSSCT00000077383	17
13	64933430	64933705	0.00702083	promoter-TSS (ENSSSCT00000012628)	ENSSSCT00000012628	41
14	58119295	58119628	0.00702083	promoter-TSS (ENSSSCT00000060292)	ENSSSCT00000058727	71
4	72881982	72882376	0.00702083	promoter-TSS (ENSSSCT00000006829)	ENSSSCT00000072229	-32
8	80115230	80115488	0.00717431	Intergenic	ENSSSCT00000060351	-175356
9	54035478	54035724	0.00720932	intron (ENSSSCT00000039943, intron 1 of 16)	ENSSSCT00000039943	27879
12	2285549	2285865	0.0072309	promoter-TSS (ENSSSCT00000071254)	ENSSSCT00000071254	39
12	61186104	61186367	0.0072309	promoter-TSS (ENSSSCT00000063871)	ENSSSCT00000045042	-106
13	24347478	24347906	0.0072309	promoter-TSS (ENSSSCT00000012337)	ENSSSCT00000085155	32
13	49090301	49090698	0.0072309	promoter-TSS (ENSSSCT00000056249)	ENSSSCT00000012586	-31
14	36063164	36063509	0.0072309	promoter-TSS (ENSSSCT00000010812)	ENSSSCT00000039293	-731
18	17987694	17988052	0.0072309	promoter-TSS (ENSSSCT00000089741)	ENSSSCT00000089741	-149
4	98062189	98062461	0.0072309	promoter-TSS (ENSSSCT00000065188)	ENSSSCT00000065188	69
5	89673401	89673740	0.0072309	promoter-TSS (ENSSSCT00000000992)	ENSSSCT00000000992	-3
6	48918120	48918340	0.0072309	promoter-TSS (ENSSSCT00000064439)	ENSSSCT00000064439	-48
12	24224058	24224416	0.00742393	promoter-TSS (ENSSSCT00000075347)	ENSSSCT00000075347	-19
13	200695377	200695776	0.00742393	promoter-TSS (ENSSSCT00000072556)	ENSSSCT00000072556	-70
13	71892429	71892854	0.00742393	promoter-TSS (ENSSSCT00000072661)	ENSSSCT00000072661	37
7	64507766	64508120	0.00742393	promoter-TSS (ENSSSCT00000002184)	ENSSSCT00000002184	-73
8	104886140	104886628	0.00742393	promoter-TSS (ENSSSCT00000032140)	ENSSSCT00000032140	97
9	6319211	6319589	0.00742393	promoter-TSS (ENSSSCT00000069256)	ENSSSCT00000040252	-128
16	27957115	27957613	0.00744245	promoter-TSS (ENSSSCT00000018376)	ENSSSCT00000065975	-170
6	158338220	158338694	0.00744245	promoter-TSS (ENSSSCT00000083319)	ENSSSCT00000084604	-153
2	61128071	61128602	0.00749866	intron (ENSSSCT00000015137, intron 5 of 9)	ENSSSCT00000056256	-10709
13	132431349	132431714	0.00758271	promoter-TSS (ENSSSCT00000065924)	ENSSSCT00000054180	-89
5	11365341	11365758	0.00758271	promoter-TSS (ENSSSCT00000024385)	ENSSSCT00000024385	-49
9	93462660	93463181	0.0075923	intron (ENSSSCT00000051661, intron 1 of 19)	ENSSSCT00000053118	109
13	159191933	159192197	0.00773004	promoter-TSS (ENSSSCT00000013098)	ENSSSCT00000013098	42
13	205181376	205181578	0.00773004	intron (ENSSSCT00000085205, intron 21 of 24)	ENSSSCT00000013217	-28470
13	29211027	29211235	0.00773004	Intergenic	ENSSSCT00000012397	22829
15	24896006	24896273	0.00773004	promoter-TSS (ENSSSCT00000057987)	ENSSSCT00000060340	-311
15	7466188	7466478	0.00773004	intron (ENSSSCT00000088846, intron 4 of 11)	ENSSSCT00000070357	2567
17	25547046	25547256	0.00773004	Intergenic	ENSSSCT00000071806	-133951
3	21330309	21330564	0.00773004	Intergenic	ENSSSCT00000087658	135143
3	42741733	42741969	0.00773004	intron (ENSSSCT00000062625, intron 2 of 27)	ENSSSCT00000062625	30619
4	56538174	56538378	0.00773004	intron (ENSSSCT00000056357, intron 1 of 6)	ENSSSCT00000067903	-10913
5	88971498	88971823	0.00773004	intron (ENSSSCT00000085407, intron 9 of 29)	ENSSSCT00000074514	-12565
7	47528914	47529274	0.00773004	intron (ENSSSCT00000001962, intron 1 of 24)	ENSSSCT00000001962	133
8	88027594	88027847	0.00773004	Intergenic	ENSSSCT00000083283	-34378
9	139383222	139383488	0.00773004	intron (ENSSSCT00000076610, intron 3 of 29)	ENSSSCT00000087700	-33617
9	69321359	69321566	0.00773004	intron (ENSSSCT00000016671, intron 1 of 3)	ENSSSCT00000020127	112309
7	24610722	24611215	0.00774795	intron (ENSSSCT00000007742, intron 3 of 10)	ENSSSCT00000040613	19698
6	67605407	67605966	0.00775635	promoter-TSS (ENSSSCT00000046591)	ENSSSCT00000046591	-176
7	86123959	86124158	0.00790875	promoter-TSS (ENSSSCT00000089316)	ENSSSCT00000082554	137
13	177288610	177288952	0.00792736	Intergenic	ENSSSCT00000073990	-13087
X	42999413	42999684	0.00803335	promoter-TSS (ENSSSCT00000024309)	ENSSSCT00000024309	-972
X	46094344	46094663	0.00803335	exon (ENSSSCT00000071272, exon 1 of 14)	ENSSSCT00000071272	314
1	189923224	189923591	0.00819227	promoter-TSS (ENSSSCT00000068709)	ENSSSCT00000052719	35
11	74267175	74267523	0.00819227	promoter-TSS (ENSSSCT00000010454)	ENSSSCT00000079262	18
14	121305353	121305760	0.00819227	promoter-TSS (ENSSSCT00000082647)	ENSSSCT00000085252	-73
14	49332832	49333109	0.00819227	promoter-TSS (ENSSSCT00000045731)	ENSSSCT00000065898	13
16	47284545	47284867	0.00819227	promoter-TSS (ENSSSCT00000029407)	ENSSSCT00000029407	-12
4	90393368	90393615	0.00819227	promoter-TSS (ENSSSCT00000007005)	ENSSSCT00000051482	-133
6	106314946	106315272	0.00819227	promoter-TSS (ENSSSCT00000029907)	ENSSSCT00000026467	-165
6	1545872	1546094	0.00819227	promoter-TSS (ENSSSCT00000068191)	ENSSSCT00000068191	43
7	30307921	30308244	0.00819227	Intergenic	ENSSSCT00000051102	-12372
9	56798486	56798897	0.00819227	promoter-TSS (ENSSSCT00000061256)	ENSSSCT00000060720	-136
1	65835605	65835808	0.00819731	exon (ENSSSCT00000067486, exon 2 of 2)	ENSSSCT00000067486	1523
12	35573254	35573484	0.00819731	promoter-TSS (ENSSSCT00000049123)	ENSSSCT00000049123	-126
12	59158949	59159256	0.00819731	promoter-TSS (ENSSSCT00000088854)	ENSSSCT00000088854	-107
12	61308218	61308485	0.00819731	promoter-TSS (ENSSSCT00000038619)	ENSSSCT00000038619	-81
13	18995254	18995509	0.00819731	exon (ENSSSCT00000046869, exon 1 of 7)	ENSSSCT00000046869	227
13	71852649	71852955	0.00819731	promoter-TSS (ENSSSCT00000043009)	ENSSSCT00000073226	-118
13	90640561	90640936	0.00819731	promoter-TSS (ENSSSCT00000030003)	ENSSSCT00000012818	-110
14	88988547	88988894	0.00819731	promoter-TSS (ENSSSCT00000036610)	ENSSSCT00000042018	-229
15	7685870	7686170	0.00819731	promoter-TSS (ENSSSCT00000038661)	ENSSSCT00000017069	32
17	37447225	37447472	0.00819731	promoter-TSS (ENSSSCT00000051775)	ENSSSCT00000046368	-766
5	66067181	66067497	0.00819731	promoter-TSS (ENSSSCT00000028356)	ENSSSCT00000028356	38
6	153212956	153213277	0.00819731	promoter-TSS (ENSSSCT00000060043)	ENSSSCT00000060043	9
6	97359568	97359779	0.00819731	intron (ENSSSCT00000031272, intron 5 of 11)	ENSSSCT00000027299	34946
9	6981854	6982095	0.00819731	promoter-TSS (ENSSSCT00000047450)	ENSSSCT00000063520	-82
18	50684400	50684980	0.00825	promoter-TSS (ENSSSCT00000040939)	ENSSSCT00000040939	-173
5	40195761	40196561	0.00831771	Intergenic	ENSSSCT00000029447	226855
1	151184055	151184254	0.00844175	Intergenic	ENSSSCT00000026784	209887
1	247766331	247766531	0.00844175	intron (ENSSSCT00000080067, intron 2 of 3)	ENSSSCT00000074333	-2692
1	7223972	7224171	0.00844175	Intergenic	ENSSSCT00000020364	-6573
1	86708328	86708527	0.00844175	Intergenic	ENSSSCT00000088292	16322
13	35975359	35975572	0.00844175	intron (ENSSSCT00000012537, intron 2 of 28)	ENSSSCT00000012537	11676
13	90214529	90214728	0.00844175	Intergenic	ENSSSCT00000079291	-30886
14	60334524	60334723	0.00844175	intron (ENSSSCT00000011154, intron 7 of 12)	ENSSSCT00000011155	-18843
15	11790669	11790915	0.00844175	Intergenic	ENSSSCT00000071826	123318
15	44491678	44491877	0.00844175	intron (ENSSSCT00000063276, intron 2 of 6)	ENSSSCT00000063276	564
16	67541352	67541551	0.00844175	Intergenic	ENSSSCT00000088691	-10580
16	788476	788675	0.00844175	intron (ENSSSCT00000071584, intron 4 of 15)	ENSSSCT00000020403	64233
17	24042704	24042909	0.00844175	intron (ENSSSCT00000025218, intron 6 of 17)	ENSSSCT00000032097	-432291
2	65676548	65676747	0.00844175	intron (ENSSSCT00000069649, intron 3 of 5)	ENSSSCT00000042437	-45161
3	28583922	28584121	0.00844175	exon (ENSSSCT00000049926, exon 8 of 9)	ENSSSCT00000076189	5437
4	64339885	64340084	0.00844175	Intergenic	ENSSSCT00000079461	54037
5	90936505	90936704	0.00844175	intron (ENSSSCT00000044658, intron 5 of 10)	ENSSSCT00000088922	-52990
7	28660727	28660926	0.00844175	exon (ENSSSCT00000045885, exon 4 of 4)	ENSSSCT00000045885	19665
8	63674375	63674574	0.00844175	Intergenic	ENSSSCT00000027663	-69740
9	37591622	37591854	0.00844175	Intergenic	ENSSSCT00000043434	-21570
9	53851962	53852161	0.00844175	intron (ENSSSCT00000039943, intron 1 of 16)	ENSSSCT00000050766	-187989
9	68983277	68983489	0.00844175	promoter-TSS (ENSSSCT00000016671)	ENSSSCT00000016671	-643
9	8761792	8761991	0.00844175	promoter-TSS (ENSSSCT00000055213)	ENSSSCT00000016190	-182
X	19912910	19913143	0.00844175	intron (ENSSSCT00000080423, intron 1 of 15)	ENSSSCT00000013315	5126
X	49047055	49047254	0.00844175	Intergenic	ENSSSCT00000082041	-30477
1	103023449	103023648	0.00844705	intron (ENSSSCT00000049593, intron 26 of 28)	ENSSSCT00000066511	-255861
1	145399491	145399731	0.00844705	Intergenic	ENSSSCT00000070358	39864
1	250239723	250239922	0.00844705	intron (ENSSSCT00000005990, intron 23 of 26)	ENSSSCT00000052792	-19106
1	64295397	64295687	0.00844705	intron (ENSSSCT00000045175, intron 9 of 9)	ENSSSCT00000004800	164366
1	76458393	76458717	0.00844705	intron (ENSSSCT00000004862, intron 1 of 7)	ENSSSCT00000004862	9021
10	8552093	8552305	0.00844705	intron (ENSSSCT00000081009, intron 1 of 1)	ENSSSCT00000074186	305
12	57791165	57791404	0.00844705	Intergenic	ENSSSCT00000081496	-21282
13	125781724	125782023	0.00844705	promoter-TSS (ENSSSCT00000071984)	ENSSSCT00000060974	-598
13	197245024	197245257	0.00844705	intron (ENSSSCT00000030581, intron 1 of 11)	ENSSSCT00000084385	3237
13	26385590	26385867	0.00844705	Intergenic	ENSSSCT00000046213	-29982
13	38708102	38708322	0.00844705	intron (ENSSSCT00000022976, intron 2 of 10)	ENSSSCT00000057110	-51083
15	17955522	17955762	0.00844705	Intergenic	ENSSSCT00000055235	-36698
15	23470183	23470382	0.00844705	promoter-TSS (ENSSSCT00000017113)	ENSSSCT00000017113	-237
15	36886317	36886563	0.00844705	Intergenic	ENSSSCT00000069850	25678
17	13159021	13159275	0.00844705	intron (ENSSSCT00000007703, intron 10 of 15)	ENSSSCT00000028117	154599
17	63355010	63355233	0.00844705	Intergenic	ENSSSCT00000037320	6868
18	47186063	47186272	0.00844705	Intergenic	ENSSSCT00000018195	16301
2	60286701	60286900	0.00844705	Intergenic	ENSSSCT00000087860	-10829
2	62316008	62316207	0.00844705	exon (ENSSSCT00000039815, exon 6 of 21)	ENSSSCT00000077067	-21097
3	16012639	16012871	0.00844705	exon (ENSSSCT00000089284, exon 16 of 16)	ENSSSCT00000008475	-58890
3	37928449	37928648	0.00844705	intron (ENSSSCT00000008707, intron 1 of 27)	ENSSSCT00000076668	394
3	86110804	86111003	0.00844705	Intergenic	ENSSSCT00000041425	-69144
5	2233615	2233835	0.00844705	Intergenic	ENSSSCT00000083633	207175
6	146273284	146273508	0.00844705	intron (ENSSSCT00000047592, intron 5 of 14)	ENSSSCT00000069874	29460
6	18663836	18664035	0.00844705	intron (ENSSSCT00000031974, intron 2 of 2)	ENSSSCT00000047886	-2631
6	38588683	38588898	0.00844705	Intergenic	ENSSSCT00000088372	-23780
6	7690775	7690993	0.00844705	exon (ENSSSCT00000077505, exon 2 of 2)	ENSSSCT00000077505	7062
6	86671662	86671881	0.00844705	Intergenic	ENSSSCT00000074166	-67886
7	54412998	54413232	0.00844705	Intergenic	ENSSSCT00000064359	-36473
2	12381850	12382064	0.00862146	intron (ENSSSCT00000026680, intron 4 of 6)	ENSSSCT00000026680	16759
11	70920715	70921017	0.00867037	Intergenic	ENSSSCT00000082783	-5556
17	13561957	13562317	0.00871956	Intergenic	ENSSSCT00000073741	41388
16	35151668	35152051	0.00875695	promoter-TSS (ENSSSCT00000034013)	ENSSSCT00000034013	-65
17	61553670	61553963	0.00875695	promoter-TSS (ENSSSCT00000062294)	ENSSSCT00000038192	104
11	18517837	18518328	0.00879091	promoter-TSS (ENSSSCT00000086085)	ENSSSCT00000086085	20
3	69602947	69603351	0.00879091	Intergenic	ENSSSCT00000024958	-26818
1	104062875	104063131	0.00880966	exon (ENSSSCT00000077955, exon 4 of 4)	ENSSSCT00000077955	20004
1	194351432	194351662	0.00880966	promoter-TSS (ENSSSCT00000039849)	ENSSSCT00000089451	328
1	43315146	43315345	0.00880966	intron (ENSSSCT00000069234, intron 1 of 1)	ENSSSCT00000072888	-77400
10	26428700	26428899	0.00880966	Intergenic	ENSSSCT00000042428	-164624
11	2096492	2096709	0.00880966	Intergenic	ENSSSCT00000082478	42841
11	41327667	41327899	0.00880966	Intergenic	ENSSSCT00000091012	59159
11	68445506	68445705	0.00880966	intron (ENSSSCT00000074169, intron 10 of 17)	ENSSSCT00000041400	-15254
13	146870022	146870236	0.00880966	intron (ENSSSCT00000084810, intron 5 of 6)	ENSSSCT00000062362	-31912
13	7537809	7538025	0.00880966	Intergenic	ENSSSCT00000066447	-181779
14	112472319	112472518	0.00880966	intron (ENSSSCT00000069725, intron 2 of 12)	ENSSSCT00000074019	5379
14	3455300	3455499	0.00880966	intron (ENSSSCT00000052127, intron 13 of 22)	ENSSSCT00000052127	159928
17	60108009	60108208	0.00880966	Intergenic	ENSSSCT00000075486	-20988
4	126033215	126033414	0.00880966	exon (ENSSSCT00000007572, exon 3 of 4)	ENSSSCT00000007572	4504
4	8750488	8750702	0.00880966	intron (ENSSSCT00000006536, intron 1 of 14)	ENSSSCT00000006536	80419
5	94943578	94943777	0.00880966	Intergenic	ENSSSCT00000068783	-55514
6	110472176	110472399	0.00880966	Intergenic	ENSSSCT00000065907	314716
6	1627588	1627797	0.00880966	intron (ENSSSCT00000072930, intron 1 of 11)	ENSSSCT00000072930	557
6	97656832	97657070	0.00880966	intron (ENSSSCT00000085005, intron 1 of 54)	ENSSSCT00000083168	13585
8	100387437	100387719	0.00880966	Intergenic	ENSSSCT00000088962	-148947
8	15316349	15316561	0.00880966	intron (ENSSSCT00000088796, intron 2 of 7)	ENSSSCT00000090748	-4048
9	91643693	91643908	0.00880966	Intergenic	ENSSSCT00000089143	7826
X	26962635	26962834	0.00880966	Intergenic	ENSSSCT00000013367	-7085
X	64890802	64891004	0.00880966	Intergenic	ENSSSCT00000074063	-15094
X	67079763	67080037	0.00880966	intron (ENSSSCT00000013621, intron 5 of 5)	ENSSSCT00000013621	53189
X	85278590	85278817	0.00880966	Intergenic	ENSSSCT00000054771	-149621
8	11818351	11818550	0.00881	intron (ENSSSCT00000052909, intron 2 of 7)	ENSSSCT00000072466	-18507
12	5208476	5208915	0.00887638	promoter-TSS (ENSSSCT00000026568)	ENSSSCT00000026568	-16
15	132174116	132174435	0.0090099	promoter-TSS (ENSSSCT00000017723)	ENSSSCT00000017723	-55
10	29439700	29440314	0.00902842	promoter-TSS (ENSSSCT00000045685)	ENSSSCT00000045685	-138
11	7320653	7321146	0.00902842	promoter-TSS (ENSSSCT00000027994)	ENSSSCT00000046065	-58
8	140061	140464	0.00902842	promoter-TSS (ENSSSCT00000082128)	ENSSSCT00000030851	-184
1	57654452	57654795	0.00917386	promoter-TSS (ENSSSCT00000004780)	ENSSSCT00000004780	-52
13	121813443	121813716	0.00917386	promoter-TSS (ENSSSCT00000076428)	ENSSSCT00000076428	59
14	128749034	128749311	0.00917386	promoter-TSS (ENSSSCT00000066905)	ENSSSCT00000084720	-152
3	125751786	125752012	0.00917386	promoter-TSS (ENSSSCT00000009445)	ENSSSCT00000009445	-71
4	67465404	67465659	0.00917386	promoter-TSS (ENSSSCT00000035957)	ENSSSCT00000035957	-483
5	16372897	16373204	0.00917386	promoter-TSS (ENSSSCT00000082380)	ENSSSCT00000082380	-1
5	23233783	23234061	0.00917386	intron (ENSSSCT00000000489, intron 1 of 6)	ENSSSCT00000000489	7108
7	59452125	59452373	0.00917386	promoter-TSS (ENSSSCT00000082589)	ENSSSCT00000082589	73
9	116109746	116110008	0.00917386	promoter-TSS (ENSSSCT00000078152)	ENSSSCT00000057043	-105
9	63396566	63396771	0.00922376	Intergenic	ENSSSCT00000023918	-223560
9	121767011	121767261	0.00943	Intergenic	ENSSSCT00000074953	-12660
1	142194322	142194530	0.00943408	Intergenic	ENSSSCT00000090643	16449
12	9192938	9193172	0.00943408	Intergenic	ENSSSCT00000080691	456943
13	129784432	129784740	0.00943408	intron (ENSSSCT00000090805, intron 1 of 4)	ENSSSCT00000071230	32880
15	15986700	15987043	0.00943408	Intergenic	ENSSSCT00000075694	-30354
6	45360615	45360862	0.00943408	TTS (ENSSSCT00000071390)	ENSSSCT00000071390	2821
6	77651904	77652123	0.00943408	exon (ENSSSCT00000089773, exon 2 of 36)	ENSSSCT00000089773	441
7	36760748	36760953	0.00943408	exon (ENSSSCT00000039661, exon 3 of 18)	ENSSSCT00000001800	207
10	24952753	24953888	0.00945177	exon (ENSSSCT00000078694, exon 1 of 3)	ENSSSCT00000079233	1936
12	22264964	22265186	0.00952342	intron (ENSSSCT00000058463, intron 1 of 8)	ENSSSCT00000058463	1418
12	52418976	52419198	0.00952342	TTS (ENSSSCT00000019512)	ENSSSCT00000019511	103
15	44886330	44886649	0.00952342	promoter-TSS (ENSSSCT00000017180)	ENSSSCT00000017180	-201
3	45201071	45201323	0.00952342	exon (ENSSSCT00000023378, exon 1 of 4)	ENSSSCT00000023378	527
6	129635499	129635836	0.00952342	promoter-TSS (ENSSSCT00000065913)	ENSSSCT00000065913	-150
14	139834260	139834693	0.00968488	intron (ENSSSCT00000043189, intron 4 of 11)	ENSSSCT00000043189	120175
5	40083812	40084119	0.0098448	Intergenic	ENSSSCT00000029447	339051
3	17743815	17744220	0.00985471	Intergenic	ENSSSCT00000085041	-1295
6	60759063	60759679	0.00985471	promoter-TSS (ENSSSCT00000030766)	ENSSSCT00000030766	-137

## Sheet: Gene Symble
Gene symble
A2M
AAK1
ABCA5
ABCB10
ABCD3
ABHD18
ABI1
ACADM
ACAP2
ACER3
ACO1
ACOD1
ACOT9
ACOXL
ACSS3
ACTR2
ACTR3
ACTR8
ACVR1B
ADAM19
ADAMTS18
ADAMTS2
ADAMTS20
ADAP1
ADCY7
ADRB1
AEBP2
AFF1
AFF4
AGA
AGAP1
AGTPBP1
AHI1
AKAP8L
AKIRIN1
ALDOB
ANKRD16
ANKZF1
ANLN
ANO3
AP2B1
APLP2
APPL2
AQP11
ARFGEF1
ARGLU1
ARHGAP26
ARHGEF3
ARID1B
ARID3B
ARL5A
ARMC10
ARMC5
ARPC5
ARPP21
ASTN1
ATAD2B
ATG4A
ATL2
ATP23
AXL
B3GNT3
B9D2
BAG2
BANP
BARHL2
BCAS3
BCAT1
BCL11A
BCL11B
BCL2L1
BFAR
BICDL1
BIRC3
BLOC1S4
BMPR2
BOLL
BPIFA2
BRD4
BSN
BSPRY
BTG1
BTG3
BTRC
C20orf27
C20orf85
C2CD2
CACNA1D
CACNB4
CACUL1
CALR3
CAMK2B
CAMTA1
CAPRIN2
CASC4
CASP3
CASTOR1
CAVIN1
CC2D1B
CCDC138
CCDC148
CCDC82
CCDC9
CCNYL1
CCT3
CD81
CDADC1
CDC25C
CDC42EP2
CDHR2
CDK5RAP3
CDKN2AIP
CDKN3
CELF4
CEMIP2
CENPJ
CEP57L1
CEP95
CERS4
CERS6
CFAP20
CFAP299
CFAP61
CGGBP1
CHERP
CHI3L2
CHKA
CHRNB1
CHST1
CHSY1
CKAP2
CLEC16A
CLPB
CMSS1
CNOT8
CNST
COL13A1
COL26A1
COL4A6
COL5A1
COLEC11
COMMD3
COP1
CORO2A
COX20
CREBRF
CRK
CRTAP
CRYM
CRYZL1
CSMD1
CSNK1G1
CTNND2
CUX2
CYCS
CYLC1
CYP2B22
CYP4V2
DAB1
DARS2
DBI
DBNDD2
DCAF8
DCC
DCTD
DCTN5
DCTPP1
DDB2
DDX59
DEGS2
DENND11
DENND4B
DGUOK
DHODH
DHRS3
DHX9
DIP2B
DIP2C
DLGAP1
DMTF1
DMXL2
DNAH17
DNER
DNM2
DNMT1
DOCK3
DOCK7
DOCK9
DPP10
DPP9
DSCAM
DTYMK
DUSP1
DUSP11
DYNC1LI1
DYSF
EBF1
EBF3
ECH1
ECI2
EDEM1
EEA1
EEFSEC
EEPD1
EGFR
EIF4A3
EIF4E
EIF4EBP2
EIF4ENIF1
EIF5B
EIF6
ELK4
ELOVL4
ELOVL5
ELOVL6
EPB41L4A
EPB41L4B
EPC2
EPOP
ERLIN2
ERO1B
ESYT1
EVI5L
EXD2
EXPH5
EXTL3
FAM102A
FAM126A
FAM135B
FAM160A1
FAM162A
FAM168B
FAM172A
FAM174A
FAM185A
FAM53C
FAM76A
FAM76B
FAR2
FAT2
FAXDC2
FBRS
FBXO21
FBXO39
FBXO42
FCGRT
FCHO2
FGF12
FGF16
FGGY
FILIP1L
FKBP5
FNIP1
FOXF1
FOXP4
FRAS1
FRMD4A
FSTL4
FTHL17
FUT8
FZR1
G3BP1
GABPA
GABRA1
GADD45A
GAP43
GATAD2B
GATB
GCLC
GDPD5
GFI1B
GGT6
GIMAP4
GLCCI1
GLE1
GLG1
GLI3
GLP2R
GLS
GLYR1
GNA13
GNAL
GNAQ
GOLGA7
GPBP1L1
GPI
GPR135
GPR156
GPR39
GPR68
GRID1
GRIN3A
GRK2
GRM7
GSAP
GTDC1
GTPBP4
GTPBP8
GYS1
HACD1
HACL1
HECA
HGS
HIC2
HIP1R
HIPK3
HIVEP1
HK3
HMG20B
HMGCS1
HNRNPR
HPCAL1
HPGD
HS3ST5
HSDL1
HSP90B1
HSPA12A
HSPA4
HSPA8
HSPB11
HSPBAP1
HSPE1
HTRA1
ICAM2
IFI6
IFNAR1
IFT52
IFT57
IGSF3
IGSF8
IL6ST
IMMT
IPO5
IQCE
IQGAP1
IQSEC2
IREB2
ISOC1
ITFG1
ITPRID2
ITPRIPL1
JMY
JPT2
KCNG2
KCNIP3
KCNIP4
KCNMA1
KCNQ3
KCNQ5
KCTD7
KDM7A
KDSR
KHDRBS1
KIAA0355
KIAA0408
KIAA1549L
KIAA2013
KIFC1
KIRREL3
KLF13
KLF14
KLF7
KLHDC4
KLHL29
KLHL32
KLHL33
KPNA4
KRAS
LARS2
LDB2
LIFR
LIG4
LIMA1
LIPT2
LMCD1
LMNA
LPP
LRFN2
LRRC20
LSAMP
LSM14B
LTBR
LUZP1
MACROD2
MAGI2
MAML2
MAN1C1
MAP2K6
MAP3K8
MAPK8
MBOAT1
MCF2L2
MCM6
MCMBP
MDGA1
MDM2
MED13L
MEDAG
MEGF11
MERTK
MFSD4A
MIDN
MITF
MLF2
MLLT1
MMD
MMS22L
MOGAT2
MPND
MPPE1
MPRIP
MRPL16
MRPL19
MSI2
MT1A
MTMR3
MTR
MVB12A
MXD4
MYLIP
MYLK
MYO1D
MYO9A
N4BP1
NABP1
NABP2
NACC1
NAV2
NCALD
NCAM1
NCBP2
NCL
NCOA1
NCOA7
NCOR2
NDUFB2
NDUFB4
NEDD4L
NEK7
NELFA
NEMP2
NEUROG2
NFKBIA
NFKBIZ
NFYA
NHS
NINJ1
NMT2
NOG
NOS1AP
NR1D1
NR3C1
NR3C2
NR4A1
NRDC
NRIP1
NRP2
NTSR1
NUB1
NUDT19
NUP153
NYX
OGDH
OPCML
OR51S1
OSBPL3
OSTM1
OTUD1
OTUD3
OTULIN
PABPN1
PAQR8
PBX1
PCF11
PCGF3
PCMTD1
PCNP
PDCD4
PDE2A
PDE4B
PDE4D
PDIA6
PDIK1L
PDPR
PDS5A
PGAM1
PGAP2
PGBD2
PGM2L1
PGP
PHF12
PHF21A
PHLPP1
PHLPP2
PIEZO2
PIK3CB
PIM2
PITPNA
PKD2
PKNOX2
PKP4
PLCL2
PLD1
PLEKHA7
PLXNA4
PLXNC1
PMFBP1
PMS2
PNRC1
PNRC2
POLA1
POLDIP3
POLR2E
POMT2
PPFIBP2
PPID
PPM1G
PPP1CB
PPP1R21
PPP1R3B
PPP1R3C
PRDM15
PRDM4
PRKACB
PRKD1
PRKN
PRMT3
PROX1
PRPF4B
PRRG3
PRSS55
PSD3
PSMA1
PSMC4
PSMD6
PSMD8
PSPC1
PSTK
PTGIS
PYGM
QRICH2
QSOX1
R3HDML
RAB28
RAB2A
RAB31
RAB5A
RAB6A
RAB7A
RABEP1
RAD52
RALGAPA2
RALY
RAPGEF4
RAPGEF5
RASA3
RASGEF1C
RBKS
RBM14
RBM15B
RCAN1
REV1
RIC8B
RIN2
RMND5B
RNASEK
RNF152
ROCK1
ROCK2
ROR2
RPN1
RPRD2
RPS6KA1
RPS6KA5
RRBP1
RRN3
RRP15
RSAD1
RSC1A1
RTL6
RTN4
RYR2
SACS
SAG
SAMD4B
SAP130
SART1
SASH1
SCAF11
SCARF1
SEC24D
SEC61A2
SEC62
SEC63
SEL1L
SEMA3C
SERF2
SERINC5
SERTAD2
SH2B3
SH3GL1
SH3GLB1
SH3KBP1
SH3PXD2B
SHQ1
SIAH2
SIMC1
SIPA1L2
SKI
SKIL
SLAIN2
SLC22A16
SLC25A25
SLC29A3
SLC2A13
SLC30A5
SLC38A10
SLC38A6
SLC39A11
SLC7A5
SLTM
SMAD5
SMAP1
SMYD3
SND1
SNRNP25
SNTG1
SNX7
SOCS4
SON
SPATS2
SPIDR
SPINK6
SPOCK3
SPRYD7
SPSB1
SREBF2
SRF
SRGAP3
SRM
SS18L2
SSBP2
ssc-mir-30a
SSR1
ST18
ST6GALNAC3
STARD4
STARD5
STARD7
STAT3
STAU2
STIM2
STK11
STK17A
STK17B
STK24
STK38L
STOML1
STT3B
STX18
STX2
STX7
STXBP3
SUCLG2
SUCO
SUMO2
SUOX
SUZ12
SYT9
TANGO6
TBC1D1
TBC1D19
TBK1
TBX1
TBX3
TCERG1L
TDRD6
TEX2
TFAP4
TFEB
THEM5
THOP1
THRAP3
THUMPD3
TIGAR
TIPRL
TM9SF2
TMC3
TMED5
TMED9
TMEM131L
TMEM150A
TMEM160
TMEM185B
TMEM50B
TNIK
TOB1
TPD52
TPGS2
TPRG1L
TRAF3IP3
TRAF6
TRAPPC9
TRDC
TRIM71
TRIM9
TRIP12
TRIR
TRMT6
TRPM7
TRPV5
TSC22D2
TSHR
TSPAN15
TSSC4
TTBK2
TTC28
TTC3
TTLL11
TWF1
UBALD2
UBE2D2
UBE2D3
UBE2D4
UBR4
UBTD2
UBXN11
UCHL5
UGP2
UNG
USF3
USP12
USP22
USP25
USP28
UST
UTP18
VAPA
VAT1L
VAV3
VEZT
VIL1
VIRMA
VPS35
VPS37C
VPS41
VPS72
VSTM2L
VSTM4
VTCN1
VWA8
WAPL
WDR1
WDR25
WDR37
WDR61
WDR66
WDTC1
WNK1
WNK2
WRNIP1
YPEL2
ZBTB14
ZBTB24
ZBTB37
ZCCHC9
ZDHHC13
ZDHHC20
ZHX1
ZHX3
ZKSCAN5
ZMYND11
ZNF135
ZNF143
ZNF169
ZNF202
ZNF217
ZNF331
ZNF341
ZNF385C
ZNF454
ZNF536
ZNF664
ZNF697
ZNF771
ZNF804B
ZNF853
ZNRF2
ZSCAN29
ZSWIM8
