# Supplementary material for: Chromatin accessibility landscape of stromal subpopulations reveals distinct metabolic and inflammatory features of porcine subcutaneous and visceral adipose tissue
Source: PeerJ. 2022 May 24;10:e13250. doi: 10.7717/peerj.13250 (PMC9138157; doi:10.7717/peerj.13250)
Supplement: Supplemental Information 4 [file peerj-10-13250-s004.xlsx]

## Sheet: Peaks of SAT
Chromosome	Start site	End site
1	21479	22554
1	23130	24737
1	185098	187699
1	193839	194973
1	288882	291122
1	374616	375929
1	487865	488227
1	540262	541625
1	557032	558218
1	577688	578974
1	630328	631619
1	648430	649709
1	650219	651120
1	651434	652373
1	671515	673064
1	710404	712697
1	748600	749940
1	759921	761566
1	765939	767917
1	776088	778987
1	794763	797780
1	802065	802842
1	803136	804052
1	825335	827721
1	848435	858172
1	863614	864668
1	865348	866366
1	891502	891803
1	892232	893364
1	897820	901313
1	1379677	1380292
1	1380712	1382714
1	1492213	1493577
1	1521954	1522455
1	1544239	1547135
1	1548708	1551002
1	1697196	1698530
1	1698871	1700162
1	1725507	1726355
1	1756162	1760674
1	1767658	1772102
1	1774413	1778112
1	1833697	1837218
1	1849057	1851315
1	1930981	1932746
1	1937077	1938547
1	1994247	1998125
1	2001300	2007470
1	2033248	2034000
1	2061775	2064452
1	2065211	2067886
1	2080426	2083390
1	2084165	2085421
1	2088911	2089863
1	2090121	2091080
1	2094592	2097466
1	2119992	2121203
1	2145242	2147479
1	2164126	2164389
1	2168564	2168983
1	2253022	2254664
1	2257234	2258108
1	2283438	2284065
1	2298399	2298752
1	2361003	2362084
1	2372570	2374638
1	2526425	2526934
1	2541495	2542943
1	2544849	2548237
1	2555267	2556559
1	2566127	2567801
1	2575785	2578496
1	4243946	4245760
1	4246050	4250871
1	4382605	4384345
1	4572444	4575569
1	4596516	4602439
1	4881529	4885566
1	4890578	4896112
1	4915061	4918290
1	4930622	4935179
1	4938265	4938703
1	4945064	4945484
1	4945953	4949906
1	5022944	5023702
1	5032485	5033839
1	5034143	5034594
1	5058335	5059284
1	5059555	5060212
1	5086763	5089668
1	5103392	5104228
1	5464376	5466168
1	5866103	5866654
1	6735891	6736742
1	6771283	6773812
1	6965460	6966388
1	6995925	6997698
1	7137573	7138098
1	7206665	7207332
1	7419091	7421389
1	7421654	7423795
1	7446502	7448163
1	7459295	7460398
1	7470751	7473441
1	7589105	7591474
1	7611606	7613208
1	7650086	7652315
1	7658231	7661807
1	7662071	7663150
1	7665376	7666472
1	7669026	7670262
1	7678589	7680701
1	8160847	8161906
1	8193806	8196122
1	8198421	8199762
1	8202741	8204147
1	8207765	8213031
1	8243403	8244561
1	8273069	8273476
1	8329809	8330351
1	8331574	8333578
1	8347680	8350143
1	8361188	8366475
1	8370259	8371617
1	8372976	8373615
1	8375329	8376582
1	8402825	8405577
1	8405698	8406456
1	8420906	8423934
1	8446886	8447785
1	8543639	8544803
1	8554478	8556908
1	8608944	8610217
1	8889928	8892171
1	8934211	8936456
1	8947533	8949179
1	9035823	9037281
1	9045701	9049251
1	9049490	9050804
1	9076533	9077536
1	9090337	9094715
1	9104895	9110535
1	9129940	9131501
1	9149583	9152012
1	9194808	9196429
1	9221427	9223726
1	9229091	9231727
1	9234463	9240194
1	9254430	9256566
1	9256813	9260493
1	9261329	9262738
1	9264411	9265246
1	9273549	9276251
1	9276691	9277228
1	9280679	9294034
1	9307703	9312983
1	9313322	9315046
1	9328279	9331562
1	9448069	9453226
1	9455729	9456416
1	9500445	9502489
1	9502679	9503284
1	9618875	9622086
1	9667456	9668460
1	9730178	9731034
1	9765282	9766779
1	9880760	9882592
1	9895440	9896169
1	9906631	9909534
1	9953099	9954454
1	9990538	9996097
1	10025695	10027623
1	10054382	10055242
1	10083547	10084969
1	10134661	10136461
1	10221444	10223796
1	10224208	10228574
1	10232526	10233717
1	10309825	10313214
1	10352956	10355643
1	10675151	10675891
1	11530427	11531154
1	11532086	11532907
1	11565549	11567558
1	11885550	11886950
1	12119460	12120216
1	12120516	12123515
1	12296718	12299103
1	12569931	12573396
1	13340262	13340959
1	13445424	13447290
1	13466225	13467245
1	13666124	13667161
1	13714966	13716645
1	13954659	13957130
1	14017348	14020035
1	14028324	14029854
1	14038237	14039637
1	14258808	14260576
1	14260979	14261342
1	14398084	14398625
1	14402157	14402970
1	14490671	14492150
1	14600847	14602137
1	14607856	14608890
1	14703256	14704645
1	14743250	14745402
1	14749460	14752160
1	14752793	14754688
1	14760749	14762122
1	14769675	14770315
1	14775257	14775836
1	14781077	14782159
1	14794001	14796568
1	14865647	14868340
1	14929339	14931657
1	15002511	15003247
1	15015852	15017962
1	15140020	15142862
1	15175421	15178525
1	15213188	15214647
1	15329450	15330046
1	15399426	15400390
1	15410599	15412012
1	15586647	15587770
1	15614356	15615237
1	15615489	15616628
1	15640537	15641739
1	15676912	15677465
1	15807946	15808724
1	16007697	16008181
1	16100198	16100678
1	16116907	16118081
1	16118326	16119660
1	16138360	16140244
1	16248275	16250234
1	16251265	16252410
1	16274395	16275983
1	16330321	16332508
1	16380822	16383056
1	16400521	16402251
1	16460553	16461362
1	16462730	16466046
1	16473868	16474994
1	16480464	16484094
1	16485775	16487339
1	16494122	16495610
1	16609645	16612611
1	16680281	16681668
1	17124512	17125112
1	17136455	17139314
1	17252569	17255429
1	17339612	17341679
1	17342236	17342680
1	17346381	17348839
1	17349726	17353506
1	17356551	17359790
1	17366099	17367262
1	17393532	17396709
1	17397114	17406081
1	17412629	17413172
1	17448341	17453057
1	17455141	17455735
1	17474908	17476131
1	17477967	17481724
1	17482368	17486569
1	17489612	17491627
1	17492074	17495821
1	17496166	17497586
1	17509523	17513156
1	17558497	17559886
1	17572336	17576020
1	17842718	17843277
1	18511785	18514229
1	18845319	18846511
1	19035481	19036157
1	19038512	19041004
1	19095287	19098721
1	19612929	19614237
1	19755541	19757533
1	19805193	19807597
1	20923140	20925192
1	20926658	20927879
1	20940016	20940538
1	20941458	20945675
1	20978685	20983796
1	20984555	20987995
1	20988231	20991171
1	21015971	21017379
1	21046333	21049718
1	21111945	21115444
1	21158022	21160460
1	21191993	21192617
1	21230102	21232185
1	21264995	21267212
1	21303311	21305128
1	21305262	21305739
1	21380105	21382689
1	21429363	21431400
1	21517398	21518975
1	21528750	21530619
1	21546466	21548775
1	21554292	21554917
1	21555222	21558711
1	21558991	21559423
1	21559698	21564204
1	21564605	21565429
1	21566500	21567071
1	21574726	21577366
1	21675251	21675797
1	21721989	21723351
1	21741253	21744026
1	21800967	21802396
1	22157561	22158400
1	22163630	22166154
1	22238148	22243867
1	22251443	22252870
1	22259813	22262334
1	22265835	22266426
1	22328427	22329530
1	22341820	22343200
1	22367621	22371103
1	22692543	22693339
1	22787013	22788688
1	22788904	22789765
1	22800453	22802506
1	22923063	22924528
1	23974471	23975322
1	24052077	24053601
1	24152620	24153636
1	24159250	24160176
1	24816447	24817147
1	25009287	25009966
1	25153146	25158909
1	25202103	25206628
1	25226940	25230210
1	25280037	25280560
1	25280794	25281952
1	25295620	25296976
1	25361715	25364685
1	25375524	25376379
1	25446055	25447740
1	25480144	25482762
1	25621583	25622890
1	25639047	25641317
1	25662746	25664286
1	25735388	25737353
1	25835655	25837867
1	25861921	25863776
1	25877814	25881564
1	25896000	25896843
1	26010238	26011745
1	26440011	26441720
1	26481286	26489734
1	26489987	26491004
1	26492766	26493406
1	26498780	26500572
1	26504540	26506681
1	26509647	26511390
1	26512275	26512812
1	26524403	26525956
1	26528385	26532110
1	26556493	26559342
1	26567579	26568652
1	26616458	26618725
1	26620477	26622066
1	26625251	26626327
1	26641977	26644709
1	26644971	26645803
1	26647940	26650933
1	26651254	26659079
1	26963157	26963593
1	26981560	26982804
1	27009406	27010129
1	27016913	27019077
1	27027560	27033279
1	27033528	27041342
1	27065186	27066732
1	27106254	27108029
1	27191688	27192284
1	27193181	27193986
1	27345368	27346683
1	27379566	27382611
1	27386563	27388242
1	27396046	27396826
1	27404674	27405666
1	27414470	27416096
1	27429153	27431542
1	27869432	27870215
1	27870714	27873288
1	27907815	27908595
1	28114551	28115769
1	28246090	28249868
1	28271212	28272201
1	28301113	28303655
1	28339472	28340053
1	28423505	28424331
1	28427881	28428413
1	28564942	28567168
1	28968429	28969524
1	29101451	29102812
1	29108610	29110962
1	29128139	29130998
1	29152750	29154195
1	29154970	29155573
1	29206862	29209480
1	29229485	29230700
1	29258983	29260484
1	29275061	29276847
1	29288244	29288701
1	29594218	29594730
1	29610535	29612006
1	29612229	29613314
1	29625738	29627162
1	29669553	29670935
1	29696050	29697932
1	29743963	29748735
1	29748969	29750380
1	29835996	29836562
1	29920656	29921027
1	29935584	29937931
1	30856964	30857674
1	30922522	30924806
1	30933385	30935618
1	30958940	30959626
1	31184448	31186220
1	31202485	31203180
1	31512333	31515317
1	31515612	31519005
1	31667163	31667783
1	31673035	31676045
1	31795717	31797717
1	31817969	31818386
1	31824476	31826089
1	31828015	31830118
1	31871983	31872830
1	31924819	31925734
1	31959411	31960786
1	32360549	32362381
1	32417325	32420035
1	32426215	32426641
1	32433194	32435582
1	32460624	32464051
1	32465185	32465961
1	32481407	32485038
1	32486489	32487447
1	32488676	32489494
1	32496125	32497436
1	32506477	32508809
1	32512893	32514915
1	32516451	32517185
1	32525918	32527171
1	32527526	32528767
1	32529383	32529700
1	32564108	32564726
1	32670080	32672901
1	32674673	32675387
1	33261133	33261942
1	33316516	33319719
1	33442693	33443280
1	33583337	33586486
1	33587003	33589183
1	33594479	33596177
1	33603836	33608037
1	33608329	33610343
1	33610826	33612796
1	33613918	33615833
1	33616435	33617991
1	33619629	33620167
1	33620912	33621785
1	33630945	33633031
1	33636309	33637619
1	33653792	33655412
1	33655681	33656414
1	33657380	33658634
1	33659232	33659918
1	34057534	34058880
1	34126066	34127126
1	34134219	34135200
1	34135628	34137547
1	34138372	34139161
1	34357837	34360279
1	34692520	34695979
1	35197856	35198356
1	35756857	35759969
1	35852493	35853958
1	35925249	35927392
1	36064061	36067789
1	36695411	36696443
1	37001347	37002680
1	37023021	37025235
1	37054831	37055366
1	37131338	37133823
1	37146710	37147711
1	37168587	37170285
1	37170593	37172895
1	37192374	37195509
1	37201935	37203735
1	37640604	37641420
1	37781121	37781761
1	37859781	37860289
1	37908813	37913710
1	37968078	37970697
1	39073126	39073740
1	39837115	39838589
1	39866104	39869663
1	39872649	39873294
1	39926330	39926781
1	40022009	40023474
1	40098827	40100643
1	40179148	40181080
1	40471885	40473526
1	40627643	40628699
1	40998651	41002102
1	41057312	41058453
1	42586414	42587361
1	42635279	42636455
1	42671407	42672310
1	42724034	42725850
1	42728235	42733614
1	42737868	42739463
1	43171355	43173521
1	43213449	43215742
1	43255264	43255727
1	43280489	43283724
1	43285057	43285840
1	43300511	43301716
1	43329832	43330581
1	43333368	43335488
1	43338847	43341456
1	43359620	43360969
1	43392104	43393932
1	43607381	43608115
1	44183957	44186653
1	44238429	44240553
1	44302613	44303504
1	44372557	44374197
1	44710936	44711812
1	44938149	44939287
1	44939905	44940980
1	45169038	45172301
1	45218853	45220678
1	48044869	48045641
1	48059836	48060208
1	49976535	49978442
1	50045349	50046162
1	50578781	50580776
1	50721238	50722571
1	50780988	50782398
1	51254728	51255185
1	51255534	51256285
1	51267136	51268978
1	51269398	51270297
1	51293600	51295218
1	51296401	51297464
1	51311550	51315737
1	51395947	51397559
1	51427517	51429248
1	51451401	51451963
1	52434138	52436626
1	52438975	52440145
1	53097513	53098353
1	53441601	53442824
1	53865201	53867402
1	54400197	54401419
1	54545690	54548136
1	54595507	54598922
1	54632531	54634576
1	55614261	55615737
1	55616968	55619650
1	55753784	55754651
1	55859473	55860989
1	55981278	55983089
1	56066536	56070871
1	56092089	56093211
1	56093492	56094838
1	56113161	56115005
1	56188449	56189095
1	56295505	56296075
1	57061009	57063821
1	57080245	57081153
1	57097531	57101165
1	57126941	57131324
1	57165097	57166234
1	57188194	57189510
1	57363078	57366274
1	57423272	57424528
1	57437802	57438785
1	57654026	57655142
1	57825128	57826903
1	57833368	57834957
1	58200337	58205083
1	58279484	58282394
1	58343665	58344092
1	58344403	58345302
1	58547001	58548175
1	58569266	58570424
1	62887300	62888683
1	63638510	63639595
1	63973083	63974382
1	64044272	64045697
1	64077958	64079439
1	64459164	64461316
1	65934948	65936183
1	66308392	66309917
1	66345762	66346773
1	66380729	66382753
1	66454130	66455159
1	66459915	66460669
1	66498274	66499717
1	67656219	67657853
1	71104038	71105094
1	71635409	71636849
1	71706451	71707509
1	72011537	72011891
1	72019270	72019881
1	72020212	72020976
1	72026814	72028131
1	72042425	72044382
1	72097245	72100008
1	72100505	72101925
1	72103924	72104790
1	72106390	72108852
1	72109929	72111052
1	72131661	72132752
1	72139128	72140021
1	72140355	72141234
1	72145800	72147315
1	72198637	72200453
1	72209092	72210946
1	72212554	72215037
1	72219283	72220944
1	72221185	72223394
1	72310163	72315639
1	72320477	72321270
1	72321504	72325016
1	72385317	72386586
1	72519487	72521007
1	72699151	72701671
1	72706250	72708791
1	72814823	72816506
1	73160843	73163368
1	73213091	73215257
1	73215612	73217382
1	73219840	73222242
1	73282588	73283157
1	73509477	73511424
1	73548132	73550886
1	73840968	73841788
1	73882932	73885465
1	73887247	73888128
1	73889429	73890116
1	73919748	73922749
1	73932177	73932706
1	73964117	73968823
1	73982234	73983270
1	74077111	74079935
1	74179780	74181967
1	74347807	74350174
1	74367066	74368555
1	74625746	74631378
1	74633235	74637384
1	74653469	74664958
1	74665326	74667588
1	74682593	74684191
1	74708207	74710123
1	74715528	74718728
1	74719851	74723155
1	74723419	74731472
1	74739282	74742132
1	74752405	74753775
1	74760614	74762556
1	74772226	74775509
1	74887804	74889436
1	74963104	74968606
1	74969362	74975754
1	74989616	74991353
1	74992588	74994929
1	74996363	74999775
1	75010304	75015667
1	75015993	75017886
1	75018284	75018676
1	75069710	75071119
1	75075725	75080217
1	75096861	75099910
1	75144958	75145565
1	75168883	75171453
1	75320279	75322982
1	75323303	75323811
1	75325732	75327217
1	75328740	75331453
1	75343013	75343458
1	75362150	75362699
1	75363445	75364292
1	75408486	75410618
1	75415148	75420438
1	75420787	75422252
1	75456411	75459278
1	75507741	75509657
1	75520040	75524534
1	75547435	75549506
1	75693697	75694990
1	76179065	76181964
1	76297647	76300403
1	76301546	76302962
1	76330108	76334614
1	76335938	76337493
1	76337978	76342131
1	76365279	76368849
1	76534759	76535314
1	76787054	76787396
1	76791866	76794185
1	76838886	76841752
1	76896291	76897484
1	76916630	76918064
1	77158366	77160436
1	77166952	77167579
1	77398372	77402795
1	77403136	77404375
1	77468330	77470183
1	77470668	77471614
1	77504469	77505596
1	77511364	77516005
1	77522111	77523790
1	77534286	77536814
1	77537103	77542042
1	77585973	77592998
1	77596825	77602726
1	77604633	77609517
1	77609793	77611080
1	77628717	77629370
1	77647972	77649395
1	77651663	77654556
1	77656415	77658055
1	77664373	77669180
1	77669505	77670294
1	77672321	77673312
1	77753215	77756867
1	77757238	77758944
1	77763777	77766189
1	77766446	77768316
1	77768667	77769733
1	77774588	77775467
1	77778699	77780593
1	77781089	77782459
1	77784600	77786352
1	77808231	77810636
1	77940623	77942476
1	77945830	77947413
1	77955162	77960354
1	77960911	77965190
1	77965461	77965974
1	77966316	77967490
1	77969812	77970695
1	77971085	77972632
1	77973102	77973944
1	77980291	77987359
1	77995906	77999085
1	78047928	78048673
1	78192403	78197126
1	78202272	78204401
1	78204824	78206425
1	78207337	78209035
1	78212691	78216735
1	78217027	78225257
1	78225317	78225878
1	79380342	79381247
1	79424643	79425608
1	79498398	79499789
1	79563337	79564357
1	79564665	79566629
1	79619526	79621569
1	79631820	79633749
1	79656149	79657793
1	79682330	79684221
1	79686691	79687484
1	79687838	79690410
1	79690426	79691459
1	79727989	79734194
1	79734556	79735523
1	79735731	79738281
1	79750261	79751883
1	79785624	79793351
1	79818246	79819414
1	79824152	79825143
1	79831765	79832519
1	79832738	79833598
1	79900339	79902199
1	81745747	81746659
1	81766632	81768801
1	81830685	81831525
1	81892080	81893607
1	81908164	81909997
1	81930916	81932009
1	81933506	81936375
1	81970094	81971703
1	81972262	81973784
1	81976633	81978119
1	81996297	81999557
1	82001597	82002540
1	82004574	82006382
1	82019872	82021518
1	82021856	82023337
1	82084852	82087615
1	82088325	82089510
1	82090134	82091057
1	82108755	82111531
1	82124068	82126024
1	82160543	82163026
1	82799142	82800862
1	83002545	83004470
1	83136608	83137524
1	83140157	83141750
1	83269747	83270650
1	83849136	83851543
1	83972499	83975434
1	84062291	84063471
1	84100223	84103469
1	84137654	84138181
1	84170055	84171550
1	84172508	84173742
1	84218720	84222484
1	84236716	84237538
1	84237974	84239089
1	84258107	84259546
1	84260232	84261308
1	84381679	84381954
1	84445107	84445831
1	84450985	84453239
1	84465462	84466301
1	84528996	84529593
1	84543763	84548213
1	85620977	85621449
1	85885034	85885940
1	86016690	86017475
1	86125053	86126126
1	86480813	86482078
1	86607100	86608580
1	86840385	86841933
1	86953980	86956156
1	87023634	87024443
1	87115193	87119481
1	87270548	87271504
1	87328905	87330322
1	89094177	89095074
1	90136881	90138515
1	90298570	90301315
1	90426610	90430781
1	90433767	90436776
1	90499304	90502141
1	90504528	90505637
1	90649705	90652925
1	90662160	90669033
1	90695724	90697427
1	90743328	90746733
1	90747371	90748813
1	91558104	91558446
1	91859107	91859554
1	92230898	92231938
1	92240173	92242051
1	92286009	92287706
1	92343524	92348254
1	92350559	92353343
1	92417816	92418900
1	92420348	92424087
1	92471655	92472533
1	92483098	92484133
1	94294643	94296920
1	94416152	94417497
1	94442419	94443164
1	94619216	94620095
1	94717596	94718692
1	95206150	95206542
1	95615978	95617260
1	95726952	95728144
1	95749643	95751569
1	95756249	95756940
1	95808300	95811093
1	95940230	95941133
1	96544470	96546482
1	96728363	96729907
1	96762685	96764529
1	97361981	97365305
1	97509863	97512369
1	97600945	97602867
1	97604627	97605730
1	97606014	97606487
1	97606791	97608113
1	97641371	97642422
1	97734308	97735543
1	97757743	97758807
1	98014480	98016490
1	98133006	98135861
1	98174913	98176365
1	98189327	98190831
1	98250706	98251246
1	98262752	98263585
1	98374092	98377641
1	98383640	98385302
1	98395496	98396506
1	98396742	98397399
1	98418428	98420974
1	98432131	98434224
1	98434469	98435570
1	98480098	98480775
1	98488414	98489959
1	98491381	98491813
1	98514375	98518001
1	98519946	98522132
1	98522476	98523565
1	98526518	98527415
1	98538433	98545156
1	98568413	98569781
1	98674670	98675348
1	98675578	98676275
1	98676529	98678135
1	98988016	98988342
1	99023464	99025158
1	99042189	99043782
1	99046895	99048455
1	99128251	99128923
1	99133896	99135079
1	99140138	99141637
1	99143347	99143959
1	99219186	99220344
1	99226702	99229139
1	99229461	99231615
1	99243653	99244116
1	99244552	99245163
1	99261898	99262836
1	99309535	99312637
1	99430490	99431777
1	99809610	99810311
1	99915996	99917875
1	99939037	99941265
1	99975347	99976762
1	100418974	100421403
1	100422394	100423830
1	100424335	100425242
1	100514320	100515625
1	100527423	100528288
1	100561445	100562836
1	100573491	100575251
1	100697385	100701189
1	103672467	103673619
1	103751143	103752877
1	103785564	103786889
1	103787124	103787773
1	103793450	103796997
1	103860806	103862221
1	104474007	104474736
1	104731451	104733146
1	104733469	104736033
1	104736410	104738290
1	104762625	104763359
1	104811327	104819441
1	104832018	104833760
1	104893983	104897873
1	104898439	104899219
1	104911794	104917433
1	104943369	104944457
1	104967847	104969934
1	105003633	105006653
1	105073916	105080613
1	105082156	105082906
1	105237396	105238323
1	105291239	105292464
1	105327054	105328852
1	105723846	105725005
1	105848661	105849257
1	105853533	105854173
1	105854428	105855173
1	106011963	106014499
1	106035355	106037747
1	106897437	106898926
1	106927304	106929269
1	106932441	106934430
1	106966828	106968477
1	106970209	106971322
1	107010783	107013297
1	107153514	107154179
1	107159192	107160899
1	107161156	107166214
1	107166551	107170677
1	107176261	107176836
1	107178228	107210295
1	107217240	107219998
1	107258398	107260203
1	107324461	107326838
1	107327132	107329688
1	107330002	107333627
1	107402703	107405482
1	107472389	107474111
1	107535349	107536188
1	107536877	107537298
1	107544194	107545920
1	107547762	107548517
1	107581534	107584027
1	107589262	107589852
1	107654032	107655248
1	107688432	107689801
1	107690067	107691329
1	107885816	107887970
1	107900478	107901246
1	107901548	107902969
1	107939644	107940763
1	107948952	107952540
1	107996946	107997827
1	108142165	108143511
1	108147250	108148131
1	108205391	108207416
1	108408460	108411732
1	108513995	108517577
1	108524203	108525160
1	108648795	108649590
1	108657705	108661233
1	108662340	108663756
1	108670696	108671965
1	108673924	108675794
1	108676131	108676638
1	108684815	108685487
1	108703583	108705961
1	108732241	108732991
1	108733327	108733859
1	108762348	108763728
1	108770141	108770537
1	108784789	108785350
1	108793389	108794949
1	108795333	108798769
1	108799044	108801570
1	108808058	108809750
1	108809895	108823034
1	108830885	108832020
1	108833339	108841641
1	108861515	108863911
1	108865207	108868133
1	108880382	108882889
1	108923317	108925068
1	108973641	108974632
1	109009795	109012181
1	109014068	109016903
1	109160852	109163067
1	109184686	109185681
1	109201711	109203510
1	109243620	109244116
1	109374701	109375781
1	109500509	109503850
1	109559174	109562170
1	109586198	109586675
1	109590789	109593025
1	109611162	109613883
1	109626745	109629408
1	109677686	109680972
1	109806803	109807460
1	109921369	109922708
1	109929854	109932670
1	109936154	109937892
1	109938141	109941121
1	110718502	110720151
1	110790126	110793199
1	110849646	110851255
1	111155827	111157072
1	111316035	111316740
1	111374678	111377157
1	111488990	111491276
1	111558197	111560480
1	111569589	111570582
1	111573687	111576510
1	111586367	111596862
1	111604993	111607098
1	111608245	111609610
1	111612396	111615163
1	112343360	112345116
1	112371183	112371957
1	112396263	112397101
1	112419714	112420565
1	112433556	112434239
1	112471513	112472504
1	112484468	112485236
1	112520673	112521468
1	112524308	112526970
1	112539322	112541574
1	112616740	112617851
1	112620052	112621649
1	112677155	112680811
1	112721937	112722266
1	112734898	112735463
1	112736299	112737070
1	112738353	112739059
1	112745493	112747745
1	112749003	112750391
1	112750637	112754602
1	112803481	112804622
1	112804943	112805836
1	112806120	112807778
1	112892463	112894713
1	112942354	112943214
1	113057605	113060512
1	113084440	113086810
1	113257622	113259300
1	113288398	113291036
1	113333413	113334738
1	113450337	113451190
1	113451529	113452212
1	113540202	113540796
1	113556774	113559204
1	113602622	113605086
1	113849555	113850516
1	113851528	113852634
1	114180723	114181702
1	114236073	114236418
1	114265820	114267646
1	114598298	114599351
1	114979433	114985107
1	115054687	115057206
1	115077782	115079651
1	115120459	115120865
1	115219517	115221614
1	115606869	115608365
1	115731956	115732493
1	115732742	115735575
1	115941413	115942884
1	116131808	116132553
1	116292457	116294017
1	116332348	116332728
1	116448109	116450921
1	116451902	116453018
1	116518810	116520569
1	116532294	116533908
1	116560193	116561638
1	116611769	116613109
1	118968587	118970410
1	119020154	119023684
1	119050014	119053088
1	119133790	119135733
1	119165302	119167100
1	119189458	119190059
1	119217447	119219147
1	119219351	119220979
1	119221902	119222669
1	119360977	119362885
1	119363669	119364764
1	119545305	119546518
1	119757407	119760194
1	119804060	119806149
1	119912920	119914492
1	119924561	119927928
1	119930414	119933701
1	119945959	119949201
1	120025833	120027110
1	120137610	120139020
1	120163701	120164173
1	120945086	120947119
1	121067284	121069317
1	121145142	121147586
1	121224436	121226935
1	121374979	121376907
1	121412233	121415897
1	121524557	121525367
1	121528130	121528781
1	121578849	121579389
1	121655033	121656767
1	121690455	121691243
1	121723056	121724273
1	121724617	121726888
1	121865642	121870791
1	121876365	121877348
1	121879715	121882533
1	122000286	122000637
1	122138069	122141377
1	122234874	122238416
1	122241820	122242464
1	122271193	122272378
1	122272622	122275055
1	122275746	122278623
1	122525612	122527047
1	122541764	122543217
1	122633600	122634900
1	122811249	122812763
1	122876257	122877303
1	123100975	123104455
1	123296292	123297023
1	123357120	123358642
1	123362488	123363614
1	123364550	123365549
1	123399741	123402822
1	123403090	123404246
1	123460834	123462985
1	123600786	123601698
1	124040860	124044563
1	126117507	126118795
1	126127014	126130588
1	126134330	126137823
1	126183936	126185791
1	126227730	126228128
1	126236034	126238137
1	126290781	126295464
1	126307508	126308002
1	126323219	126323734
1	126333867	126336076
1	126344676	126345136
1	126361242	126363920
1	126397811	126398885
1	126541079	126543481
1	126549018	126550810
1	126569791	126572706
1	126643067	126644171
1	126699961	126701157
1	126824557	126826753
1	126844069	126845424
1	126871674	126872708
1	126889919	126891479
1	126901107	126903673
1	127017935	127020154
1	127124120	127126428
1	127237331	127239244
1	127317773	127318415
1	127366855	127367858
1	127739096	127742507
1	127758657	127761093
1	127764152	127768686
1	127780770	127781731
1	127813032	127815239
1	127865361	127866354
1	127915779	127917964
1	127928973	127931536
1	127932060	127932643
1	127933122	127934210
1	127935937	127938656
1	127958003	127959355
1	128083222	128085258
1	128124970	128126830
1	128185022	128185748
1	128201370	128202240
1	128268357	128270293
1	128305000	128306402
1	128331149	128332748
1	128488711	128490787
1	128640279	128642926
1	128768318	128769315
1	128774880	128776009
1	128789045	128790290
1	128799272	128800065
1	128807476	128810389
1	128838362	128840433
1	128885820	128889785
1	128893360	128894769
1	128946662	128947176
1	129005890	129006343
1	129008597	129009846
1	129010951	129014856
1	129096789	129099453
1	129143847	129145250
1	129373894	129378824
1	129380113	129384044
1	129391237	129391737
1	129400549	129405840
1	129419706	129425604
1	129425908	129427144
1	129427432	129433576
1	129436172	129436891
1	129437129	129438371
1	129441340	129443980
1	129445988	129447564
1	129460309	129460632
1	129522642	129523502
1	129532535	129534297
1	129557210	129558384
1	129558638	129560674
1	129586899	129589238
1	129695372	129698053
1	129755894	129756364
1	129758606	129759203
1	129761907	129763430
1	129781340	129785082
1	129828111	129829370
1	129838121	129839195
1	129874381	129876491
1	129941666	129943366
1	129967662	129968987
1	130035011	130036264
1	130036510	130036959
1	130064219	130066580
1	130111470	130113663
1	130198888	130199463
1	130199777	130203237
1	130304538	130305424
1	130306829	130310379
1	130351373	130352491
1	130373066	130377495
1	130384173	130388228
1	130405871	130408634
1	130416934	130420474
1	130515852	130517296
1	130562289	130564438
1	130573903	130575129
1	130639530	130640844
1	130746154	130747445
1	130752538	130753941
1	130845484	130847717
1	130872077	130874625
1	130909761	130911577
1	130929068	130929707
1	130939515	130940908
1	130974204	130977218
1	130991253	130993839
1	131004253	131006769
1	131032854	131035047
1	131038407	131039939
1	131065910	131067049
1	131143951	131144627
1	131171536	131173530
1	131177581	131185154
1	131187345	131189708
1	131203783	131204306
1	131204927	131207599
1	131211487	131213563
1	131220057	131220368
1	131230825	131231585
1	131241003	131242538
1	131354197	131356106
1	131364391	131366501
1	131391899	131393112
1	131743807	131748391
1	131808635	131809296
1	132166809	132167743
1	132457748	132458114
1	132519993	132520627
1	132667616	132669383
1	132701813	132703487
1	132818335	132819506
1	132882730	132887829
1	133012194	133012757
1	133013788	133018894
1	133020879	133023169
1	133050877	133053351
1	133058457	133059534
1	133119123	133121503
1	133149150	133152776
1	133203205	133204642
1	133207544	133209811
1	133238111	133240584
1	133273110	133274866
1	133444588	133445784
1	134002772	134004357
1	134012003	134013347
1	134013622	134019347
1	134362453	134363001
1	134537634	134538963
1	135131074	135132677
1	135422809	135423811
1	135424108	135425420
1	135576440	135578823
1	135889058	135889853
1	136120632	136121742
1	136135871	136136626
1	136496459	136498302
1	137008131	137009616
1	137118168	137120281
1	137120631	137122137
1	137489574	137492193
1	137503712	137506183
1	137658713	137659277
1	137688147	137691841
1	137782229	137783587
1	137824826	137826644
1	137855730	137856897
1	137996577	137999528
1	138144476	138145864
1	138166401	138167746
1	138189151	138189953
1	138209299	138210520
1	138233898	138234813
1	138235060	138236403
1	138242849	138247995
1	138254107	138260484
1	138279439	138287676
1	138313141	138313647
1	138330947	138331379
1	138336871	138343836
1	138566596	138568042
1	138737676	138738714
1	138981470	138984300
1	139014156	139015465
1	139019266	139019871
1	139041813	139042521
1	139043539	139044697
1	139045349	139045915
1	139068274	139068718
1	139190178	139191189
1	139191436	139192418
1	139238531	139238908
1	139240244	139242189
1	139242830	139244413
1	139261559	139264340
1	139264541	139265803
1	139270146	139271728
1	139299889	139300364
1	139301431	139303352
1	139319235	139323428
1	139336993	139337675
1	139346756	139348304
1	139348663	139350235
1	139450847	139452413
1	139492712	139497543
1	139497827	139500113
1	139501524	139505044
1	139506463	139508456
1	139517522	139521658
1	139541555	139542554
1	139548992	139550238
1	139559529	139560086
1	139581197	139581709
1	139582001	139583049
1	139636702	139638367
1	139719790	139720741
1	139726392	139726827
1	139726996	139728018
1	139728342	139730442
1	139789133	139790795
1	139793854	139797152
1	139800108	139802412
1	139802694	139805569
1	139835798	139837933
1	141310356	141311335
1	141442637	141444651
1	141493279	141497989
1	141560935	141561347
1	141561816	141563595
1	141563720	141564137
1	141571701	141572020
1	141577509	141580116
1	141886155	141888516
1	143413540	143419414
1	143420764	143421168
1	143454653	143460837
1	143494091	143494703
1	143500684	143512952
1	143513661	143535145
1	143535998	143542519
1	143593815	143594384
1	143598593	143601078
1	143627119	143629852
1	143632316	143635945
1	143648857	143649396
1	143649994	143651569
1	143744535	143745229
1	143788983	143789750
1	143804035	143804643
1	143804877	143805699
1	143824334	143825935
1	143866695	143868850
1	143960819	143962063
1	143992471	143994187
1	144473094	144474826
1	145058358	145061084
1	145137606	145138247
1	145358852	145360711
1	145363742	145364472
1	145367037	145367788
1	145507963	145508525
1	145527897	145528269
1	145706526	145708669
1	145810180	145812522
1	145835225	145836948
1	145837607	145844437
1	145878342	145881032
1	145914967	145917618
1	145918056	145919436
1	145933260	145933905
1	145954126	145958042
1	145996597	146004696
1	146006673	146011138
1	146015488	146018648
1	146220754	146222563
1	147458362	147459341
1	147568019	147571935
1	147573518	147578158
1	147578667	147582279
1	147582576	147583573
1	147591053	147594143
1	147598002	147599793
1	147610958	147613572
1	147616814	147618380
1	147621406	147621865
1	147622193	147622792
1	147623330	147624170
1	147659668	147663232
1	147665171	147667456
1	147671864	147678125
1	147780273	147783161
1	147796361	147796998
1	147808688	147811318
1	147817697	147820610
1	147829922	147832822
1	147833051	147834218
1	147834740	147835370
1	147843023	147843817
1	147895117	147897114
1	147957176	147958567
1	147962976	147964917
1	147982524	147989648
1	148006364	148007541
1	148007892	148009179
1	148009951	148010457
1	148022843	148025200
1	148028472	148029389
1	148061326	148065728
1	148197568	148198537
1	148198819	148199904
1	148200330	148200894
1	148946600	148949282
1	148975505	148976229
1	148983814	148989857
1	148990831	148992798
1	149506847	149508123
1	149516102	149517966
1	149579008	149584974
1	149736822	149738738
1	149855103	149857260
1	149917476	149918096
1	149945888	149946536
1	152635192	152637120
1	152688947	152690175
1	153987599	153988956
1	154918542	154920617
1	157828501	157828831
1	157833922	157837696
1	157853121	157854375
1	157854529	157855447
1	158051341	158051884
1	158094428	158095282
1	158096554	158097015
1	158232407	158234258
1	158261629	158261980
1	158287524	158289927
1	158313745	158316204
1	158334948	158339909
1	158374064	158374584
1	158386193	158387381
1	158406422	158409771
1	158413179	158416802
1	158417027	158417732
1	158435477	158437485
1	158457142	158458061
1	158465960	158467756
1	158469435	158469855
1	158479358	158487345
1	158498030	158504613
1	158505489	158506379
1	158685002	158687554
1	158736966	158738355
1	158860057	158862655
1	158862905	158863497
1	158948869	158949640
1	159018277	159019450
1	159019774	159024484
1	159037633	159039856
1	159043467	159045374
1	159094243	159096418
1	159132952	159134471
1	159141554	159144784
1	159177859	159184346
1	159184622	159188186
1	159316654	159318581
1	159529385	159532638
1	159551943	159552807
1	159571078	159572075
1	159574838	159575457
1	159577954	159578801
1	159809363	159810447
1	160023717	160025353
1	161176087	161177461
1	161177675	161180560
1	161186774	161189659
1	161198730	161200101
1	161201565	161204068
1	161320445	161321089
1	161321322	161321771
1	161387139	161387661
1	161606511	161608028
1	161768510	161769729
1	161897691	161899354
1	161906351	161907217
1	161948344	161951867
1	161953396	161954535
1	161956451	161958534
1	161976343	161979193
1	161979634	161982274
1	161982718	161985280
1	162058429	162062524
1	162089870	162090287
1	162144121	162146103
1	162259558	162260402
1	162260687	162261561
1	162511294	162512120
1	162520903	162521703
1	162734986	162737080
1	162935660	162938429
1	162951428	162953060
1	162964635	162965233
1	163019917	163020340
1	163102745	163104606
1	163168758	163170971
1	163220333	163222962
1	163234877	163239901
1	163250763	163253239
1	163292695	163294194
1	163318410	163321132
1	163326024	163328796
1	163334193	163336618
1	163369712	163370752
1	163428794	163430443
1	163434805	163436345
1	163516360	163518244
1	163525307	163527039
1	163602227	163604122
1	163788281	163791743
1	163801275	163805747
1	163814391	163815845
1	163817135	163818106
1	163857009	163860435
1	163898360	163899550
1	164194533	164195165
1	164274858	164275526
1	164309694	164311819
1	164368346	164369572
1	164374071	164375509
1	164381321	164383486
1	164427632	164428688
1	164442093	164444122
1	164473959	164475782
1	164479110	164482541
1	164542026	164543022
1	164579825	164582751
1	164585359	164586802
1	164654279	164662662
1	164663021	164663914
1	164665248	164668649
1	164697797	164700279
1	164708286	164710137
1	164710385	164712252
1	164713753	164718347
1	164718994	164720971
1	164725821	164728099
1	164731180	164733790
1	164752766	164755209
1	164755450	164755988
1	164771997	164772459
1	164772735	164773780
1	164781902	164784836
1	164790269	164791812
1	164834593	164835712
1	164960666	164961315
1	164962727	164964984
1	164965114	164966890
1	164980770	164982220
1	164984827	164987410
1	164996546	165002648
1	165005216	165008241
1	165008492	165010322
1	165012386	165013498
1	165015024	165015802
1	165016172	165022661
1	165025353	165027390
1	165034733	165036130
1	165036445	165038940
1	165043794	165044824
1	165050036	165061108
1	165071677	165075294
1	165077749	165081511
1	165082137	165084915
1	165094061	165099886
1	165110904	165120879
1	165122116	165126112
1	165130795	165132022
1	165134352	165135075
1	165135646	165137163
1	165137394	165140286
1	165181731	165182317
1	165192020	165193473
1	165436183	165438017
1	165457388	165459243
1	165762756	165764230
1	165766076	165768704
1	165774898	165775876
1	165782603	165783478
1	165809582	165810349
1	165957043	165958609
1	166093117	166094291
1	166094772	166097895
1	166098164	166101010
1	166106492	166109289
1	166111100	166113043
1	166124809	166128955
1	166147615	166148623
1	166161600	166163973
1	166310345	166310823
1	166367571	166368274
1	166428334	166429851
1	166443663	166444203
1	166464687	166467614
1	166483957	166484705
1	166495524	166498890
1	166509873	166511344
1	166527968	166529323
1	166533804	166535258
1	166535736	166536772
1	166539804	166540447
1	166569778	166571294
1	166605811	166607802
1	166696278	166702093
1	166924367	166926057
1	166936976	166938264
1	166942104	166945036
1	166952438	166953227
1	166975713	166977279
1	167007290	167009433
1	167154204	167155418
1	167222358	167224231
1	167239262	167240861
1	167295424	167297568
1	167300839	167301393
1	167304447	167304831
1	167421828	167423376
1	167423559	167424656
1	167431314	167434227
1	167501458	167504477
1	167505415	167506737
1	167522838	167523426
1	167523948	167524950
1	167525327	167527866
1	167528859	167530814
1	167532181	167534892
1	167536833	167538720
1	167598028	167600171
1	167853025	167857753
1	167866377	167868005
1	167868433	167870554
1	167914558	167915186
1	167944041	167945526
1	168014312	168015224
1	168072240	168073607
1	168074152	168075216
1	168075519	168076173
1	168211157	168214659
1	168214911	168217829
1	168218064	168221924
1	168224205	168224745
1	168226071	168227990
1	168242006	168242751
1	168451680	168453376
1	168477045	168477851
1	168480657	168481629
1	168504685	168510012
1	168510859	168515608
1	168527685	168532199
1	168552663	168554047
1	168751218	168752037
1	169592154	169592854
1	169595181	169598919
1	169615724	169616388
1	169670675	169672519
1	169675332	169676872
1	169721871	169723442
1	169724625	169726618
1	169800735	169803154
1	169883422	169884847
1	169913135	169917412
1	171905515	171906149
1	175145466	175147453
1	175197236	175199880
1	175284715	175286403
1	175331629	175334567
1	175446789	175449551
1	179455865	179457648
1	179461152	179462794
1	179476794	179479602
1	179488989	179491250
1	179529334	179530511
1	179539578	179541479
1	179610314	179613075
1	179670109	179671387
1	179685201	179686460
1	179686838	179688602
1	179696898	179698824
1	179711532	179715560
1	179726617	179729696
1	179751582	179753264
1	179771804	179773847
1	179782027	179785539
1	179786929	179788645
1	179788909	179793074
1	179793591	179794853
1	179795145	179797656
1	179806757	179812783
1	179815437	179818831
1	179821404	179823901
1	179827273	179831007
1	179834437	179834976
1	179840483	179843369
1	179851097	179852487
1	179853756	179854487
1	179866008	179868747
1	179883255	179885644
1	179887628	179888120
1	179891331	179893754
1	179906234	179907807
1	180013275	180016384
1	180067842	180072185
1	180093627	180097274
1	180144623	180145778
1	180298386	180299965
1	180432041	180435163
1	180581393	180581922
1	180591424	180593744
1	180620319	180622380
1	180642517	180642907
1	180702694	180705231
1	180933402	180934815
1	180984880	180986159
1	180988208	180991739
1	181025119	181029755
1	181031529	181033879
1	181034190	181036486
1	181073289	181074380
1	181074717	181077762
1	181087608	181088747
1	181093278	181097276
1	181097612	181098611
1	181108381	181109368
1	181337779	181340932
1	181427796	181428543
1	181439491	181441102
1	181498934	181500499
1	181501303	181501871
1	181502244	181504843
1	181510615	181511848
1	181515293	181518891
1	181529201	181530925
1	181563457	181565636
1	181576398	181576876
1	181590273	181592875
1	181652140	181652746
1	181653031	181655340
1	181680845	181682137
1	181707596	181708299
1	181771329	181773885
1	181786486	181787310
1	181830893	181831300
1	181893062	181894470
1	181920242	181920567
1	181994712	181997680
1	182030024	182032038
1	182035455	182038155
1	182202185	182202908
1	182203270	182204641
1	182311285	182312118
1	182316506	182319931
1	182327454	182330216
1	182357363	182359145
1	182422289	182424085
1	182604040	182606954
1	182646020	182646909
1	182752752	182754844
1	182882597	182883365
1	183417815	183420516
1	183827977	183829134
1	183861339	183864116
1	183865193	183868654
1	183876277	183878542
1	183914316	183917970
1	183931702	183932029
1	183962725	183963066
1	183978355	183981018
1	183996928	183997787
1	184000522	184002100
1	184002498	184005926
1	184006597	184007052
1	184023169	184024113
1	184025208	184026505
1	184026851	184028317
1	184028690	184032254
1	184032597	184033197
1	184255594	184257777
1	184377618	184380537
1	184400662	184402869
1	184421331	184424128
1	184439915	184444283
1	184444780	184459999
1	184474240	184474639
1	184478244	184480557
1	184480725	184483085
1	184483572	184484111
1	184484243	184485156
1	184485388	184487391
1	184550118	184551170
1	184583462	184586141
1	184599250	184601421
1	184665093	184665656
1	184676835	184677633
1	184742864	184744892
1	184880662	184882846
1	185397277	185399348
1	185420353	185421029
1	185492358	185493195
1	185821058	185823239
1	186429233	186430839
1	186529151	186531389
1	187306568	187309171
1	187337945	187340665
1	187342367	187344881
1	187375193	187377716
1	187384013	187385057
1	187385299	187387041
1	187474695	187475486
1	187503440	187505323
1	187718322	187720976
1	187762612	187763422
1	187783565	187785736
1	188242805	188243784
1	188334475	188337529
1	188382307	188383341
1	188388043	188388472
1	188390942	188397932
1	188416904	188417549
1	188430584	188433451
1	188437435	188437927
1	188456925	188459635
1	188471682	188473910
1	188481585	188484961
1	188485265	188489875
1	188494213	188495379
1	188511268	188514455
1	188540270	188543267
1	188580965	188582907
1	188597616	188599669
1	189109672	189111525
1	189149529	189150001
1	189169161	189171037
1	189247850	189250300
1	189549558	189550189
1	189612747	189613661
1	189621503	189625024
1	189631425	189633037
1	189680665	189682560
1	189689962	189691286
1	189922531	189925028
1	190123647	190124180
1	190161426	190164812
1	190165131	190168157
1	190168419	190172212
1	190205622	190209214
1	190268422	190269172
1	190348833	190354420
1	190392934	190393482
1	190399231	190399839
1	190440786	190442766
1	190514275	190517039
1	190624097	190626954
1	190656172	190656956
1	190676995	190678510
1	190685505	190688625
1	190735601	190736270
1	191192971	191196520
1	191210374	191211907
1	191263387	191264078
1	191320987	191322517
1	192079308	192079774
1	194238830	194239383
1	194239836	194243372
1	194245158	194249044
1	194263265	194264744
1	194349694	194353607
1	194438570	194440701
1	194503288	194506188
1	194778618	194779171
1	194803490	194807561
1	194828040	194830450
1	194841777	194842875
1	194843115	194845455
1	194848405	194849278
1	196034010	196034733
1	196039523	196040927
1	196046008	196047452
1	196050784	196052438
1	196173125	196174405
1	196175812	196178292
1	196229166	196230279
1	197308565	197310188
1	200647481	200648368
1	200772971	200775039
1	200932862	200934880
1	201278342	201279403
1	201292452	201293120
1	201302169	201302586
1	201343412	201344393
1	201412890	201413237
1	201423549	201424597
[truncated: 27,951 more rows]

## Sheet: Peaks of VAT
Chromosome	Start site	End site
1	21531	24473
1	185042	188258
1	193841	194835
1	198265	200952
1	216876	218632
1	289279	291067
1	340341	340688
1	373744	376508
1	389706	392645
1	393440	395403
1	426217	428921
1	475158	476485
1	487727	488287
1	507894	510570
1	539932	541842
1	555416	556277
1	556930	558167
1	577625	579185
1	671510	673030
1	776684	778622
1	803257	803786
1	825005	825805
1	826331	827919
1	848829	853621
1	853954	857301
1	857561	858263
1	865056	866157
1	890701	891156
1	892289	893428
1	897389	901592
1	910901	913278
1	1492161	1493366
1	1495396	1496460
1	1592925	1594706
1	1696921	1698530
1	1698856	1700007
1	1725318	1727010
1	1728246	1730683
1	1752130	1758088
1	1765681	1772222
1	1773930	1778306
1	1807691	1810831
1	1815494	1816635
1	1849191	1851239
1	1930138	1932807
1	1933392	1934751
1	1937175	1937879
1	1939449	1939943
1	1995282	1997939
1	2004146	2005469
1	2005755	2008352
1	2012564	2013120
1	2034352	2034754
1	2039273	2040061
1	2061850	2062418
1	2062658	2064422
1	2065148	2068818
1	2080286	2083397
1	2083912	2085194
1	2090153	2090836
1	2095244	2095672
1	2096127	2096968
1	2119971	2121212
1	2145242	2147528
1	2148696	2149227
1	2159410	2160049
1	2164090	2164537
1	2176053	2177400
1	2249872	2250254
1	2253276	2254565
1	2327826	2328342
1	2328574	2329141
1	2361171	2362134
1	2371759	2372306
1	2372469	2373415
1	2373663	2374482
1	2375067	2375624
1	2541486	2542511
1	2566430	2567809
1	2575781	2578199
1	2825989	2828951
1	2881971	2882437
1	3119581	3122539
1	3401545	3401886
1	4243883	4245829
1	4246131	4250945
1	4380991	4384654
1	4572647	4575407
1	4598687	4602702
1	4624652	4625231
1	4879362	4881022
1	4881503	4885120
1	4889728	4890546
1	4890674	4896071
1	4896461	4896904
1	4916225	4918185
1	4918635	4919038
1	4920077	4921028
1	4929994	4933518
1	4936307	4937624
1	4945923	4949923
1	4950172	4951735
1	4951999	4953127
1	4953405	4954439
1	5023048	5024062
1	5031395	5033732
1	5034158	5035852
1	5057823	5058918
1	5059509	5060121
1	5086612	5089592
1	5098623	5101304
1	5101829	5103111
1	5103531	5104095
1	5464314	5466377
1	6771251	6773848
1	6961152	6963380
1	6964955	6966758
1	6995982	6997765
1	7049163	7049847
1	7417763	7421299
1	7421530	7423682
1	7427864	7428751
1	7432827	7433638
1	7438746	7442114
1	7446514	7448335
1	7459348	7460365
1	7470847	7473472
1	7507560	7508475
1	7554117	7555048
1	7588790	7591447
1	7611768	7613498
1	7648241	7648904
1	7649908	7652246
1	7658546	7662009
1	7665380	7667358
1	7678302	7680766
1	7681050	7682009
1	7682262	7683222
1	8105974	8107324
1	8160427	8162305
1	8164507	8165100
1	8165597	8167652
1	8189665	8190292
1	8191341	8197802
1	8198294	8199835
1	8200424	8201262
1	8202607	8205499
1	8208143	8213490
1	8243464	8244632
1	8331610	8332731
1	8347286	8350520
1	8361258	8366599
1	8368504	8369223
1	8369619	8371604
1	8372229	8372791
1	8374904	8376477
1	8385364	8385870
1	8386146	8386640
1	8402729	8406639
1	8407486	8408516
1	8423390	8424086
1	8447236	8447940
1	8543633	8544597
1	8554105	8556889
1	8609036	8610541
1	8889951	8892147
1	8934168	8936771
1	8947517	8948352
1	9047553	9049290
1	9049522	9050781
1	9076931	9077334
1	9079756	9080332
1	9080584	9081062
1	9082059	9082366
1	9090251	9094800
1	9103394	9104359
1	9104899	9106150
1	9107666	9109976
1	9130725	9131336
1	9194806	9196226
1	9196892	9198115
1	9207290	9207829
1	9208405	9209371
1	9221370	9223753
1	9235488	9240869
1	9248814	9250477
1	9251390	9252350
1	9254431	9260540
1	9261328	9262699
1	9273678	9277050
1	9280736	9282165
1	9282435	9285560
1	9285815	9294080
1	9295412	9298117
1	9307869	9308488
1	9309074	9309887
1	9310182	9311855
1	9449171	9449728
1	9618861	9622184
1	9667319	9668625
1	9730144	9731037
1	9765356	9766669
1	9880562	9882803
1	9898227	9898620
1	9906778	9909559
1	9911583	9912812
1	9952948	9955130
1	9990220	9991907
1	9992049	9996258
1	10025628	10027721
1	10134569	10136560
1	10211903	10212400
1	10221385	10223808
1	10224650	10228587
1	10229858	10230591
1	10232473	10233841
1	10309924	10313237
1	10353539	10354844
1	11400950	11401620
1	11565516	11567278
1	11885751	11887019
1	12119656	12123472
1	12173064	12174124
1	12296845	12299073
1	12369314	12370357
1	12439050	12440011
1	12476040	12476839
1	12568900	12569640
1	12569883	12570867
1	12570958	12572859
1	13340276	13341126
1	13445451	13447186
1	13465836	13467249
1	13714982	13716738
1	13722897	13723660
1	13954620	13956903
1	13970217	13970822
1	14017543	14019984
1	14028228	14029457
1	14038191	14039572
1	14219805	14220521
1	14490679	14491182
1	14600887	14602375
1	14742078	14743901
1	14744151	14745503
1	14745768	14746578
1	14749542	14752112
1	14752940	14754876
1	14775172	14775822
1	14781854	14782135
1	14793835	14795407
1	14795702	14796481
1	14865527	14868839
1	14928971	14931772
1	15015977	15017932
1	15124979	15125875
1	15139936	15140520
1	15140875	15142596
1	15175513	15178593
1	15180720	15188658
1	15188821	15192129
1	15328531	15330346
1	15397955	15400210
1	15439322	15440172
1	15489072	15491138
1	15491424	15493783
1	15585351	15588463
1	15640714	15642473
1	15648559	15649340
1	15987073	15987839
1	16007645	16008162
1	16021746	16022691
1	16043237	16043794
1	16100185	16100780
1	16116791	16118080
1	16118317	16119658
1	16138299	16140295
1	16161585	16162338
1	16248236	16250228
1	16251157	16252379
1	16274405	16276328
1	16330248	16331884
1	16380844	16383003
1	16400431	16402309
1	16453840	16454782
1	16462834	16466050
1	16466489	16466807
1	16467079	16468844
1	16471261	16471581
1	16480085	16482697
1	16483087	16483845
1	16484686	16485977
1	16486180	16486806
1	16487037	16487541
1	16609544	16612663
1	16648194	16650128
1	16678314	16678763
1	16679954	16681464
1	17136508	17139238
1	17248665	17249962
1	17251121	17251578
1	17252683	17256325
1	17351575	17352174
1	17352540	17353076
1	17394037	17396176
1	17398153	17406500
1	17448532	17450491
1	17450794	17451450
1	17451793	17453010
1	17459944	17460777
1	17465788	17466980
1	17472788	17474192
1	17475500	17476132
1	17477877	17481823
1	17482471	17485503
1	17489517	17490753
1	17490990	17491651
1	17491974	17492988
1	17493174	17495869
1	17495884	17496372
1	17508051	17514337
1	17574678	17576128
1	18289130	18289823
1	18511919	18514205
1	18845107	18847241
1	19035351	19036111
1	19095486	19098707
1	19612182	19612643
1	19612960	19614254
1	19755394	19757568
1	19805584	19807817
1	20881639	20882408
1	20920433	20921268
1	20923166	20925559
1	20925789	20929757
1	20930190	20930771
1	20941455	20946518
1	20956668	20958404
1	20976526	20984306
1	20984583	20991158
1	21015879	21017804
1	21046131	21049885
1	21111037	21115649
1	21116826	21117315
1	21157918	21160362
1	21190482	21191515
1	21230098	21232077
1	21265132	21267629
1	21303592	21305416
1	21429064	21431202
1	21510596	21513471
1	21513794	21515172
1	21515336	21520163
1	21521441	21525363
1	21527818	21530786
1	21544990	21550027
1	21550338	21551615
1	21552070	21552784
1	21553078	21558704
1	21558921	21566262
1	21566542	21568416
1	21573770	21577367
1	21678935	21680812
1	21722063	21723240
1	21741535	21743862
1	21800891	21802818
1	21855155	21855985
1	22162886	22166078
1	22180640	22181758
1	22238531	22244284
1	22259216	22261070
1	22300062	22301293
1	22340765	22343046
1	22692734	22694094
1	22698923	22699258
1	22787518	22788535
1	22800390	22803000
1	22922900	22924352
1	23974518	23975739
1	24151478	24154496
1	24159186	24159959
1	24530858	24532306
1	24813851	24814942
1	24884635	24885482
1	25152861	25160540
1	25200983	25203646
1	25203885	25206682
1	25207121	25207659
1	25226731	25230285
1	25279711	25281695
1	25295439	25297207
1	25361155	25364821
1	25445857	25447661
1	25480133	25482601
1	25483783	25485601
1	25498632	25500305
1	25500648	25501764
1	25621409	25622986
1	25638950	25641973
1	25643830	25644716
1	25662790	25664291
1	25735216	25737435
1	25835213	25837764
1	25848476	25848790
1	25851964	25852569
1	25860773	25861591
1	25862207	25863831
1	25868873	25869895
1	25871209	25872083
1	25877754	25880417
1	25880614	25881660
1	25895640	25897461
1	26010156	26011707
1	26255458	26255783
1	26301157	26301700
1	26392988	26393753
1	26432587	26433911
1	26439972	26441931
1	26462513	26464221
1	26481538	26483151
1	26483487	26486435
1	26486683	26492512
1	26492749	26494371
1	26498741	26500574
1	26500799	26506766
1	26506919	26512894
1	26522609	26523261
1	26527143	26532400
1	26553776	26558522
1	26564207	26565466
1	26609203	26610611
1	26616067	26618583
1	26619808	26621535
1	26625018	26626245
1	26643187	26644616
1	26644978	26645752
1	26646174	26646686
1	26647802	26651011
1	26651241	26657980
1	26681311	26682318
1	26692086	26692744
1	26699726	26700208
1	26981334	26982868
1	26985486	26988698
1	26988995	26990528
1	27017571	27019038
1	27023863	27025441
1	27025828	27033245
1	27033504	27041406
1	27057403	27057785
1	27065485	27067235
1	27069093	27070052
1	27105949	27108357
1	27250373	27251759
1	27345462	27346629
1	27379629	27383422
1	27385943	27388323
1	27397984	27399819
1	27400997	27401483
1	27404600	27405679
1	27413305	27416852
1	27431767	27432419
1	27446771	27447398
1	27460655	27461478
1	27571046	27572225
1	27606471	27606930
1	27869433	27870224
1	27870453	27873517
1	27875958	27876401
1	27907797	27908572
1	28045929	28048811
1	28052202	28053173
1	28055945	28060114
1	28070453	28072911
1	28112064	28116982
1	28246128	28249888
1	28270188	28272668
1	28300938	28304161
1	28423748	28424311
1	28426974	28428528
1	28564827	28567316
1	28854129	28855414
1	28855783	28857301
1	28931136	28932050
1	28968175	28969654
1	29101504	29103008
1	29108502	29111013
1	29152529	29154568
1	29154996	29155599
1	29206939	29208033
1	29208262	29209218
1	29228717	29230766
1	29259750	29260453
1	29277005	29278489
1	29288132	29289085
1	29289716	29290195
1	29309719	29310250
1	29397978	29398676
1	29414085	29414857
1	29525522	29526233
1	29542622	29542963
1	29547036	29547851
1	29572003	29574086
1	29574376	29578187
1	29592604	29592973
1	29593107	29594934
1	29604755	29605372
1	29606871	29607453
1	29610013	29614367
1	29625574	29627942
1	29645608	29645923
1	29669767	29670934
1	29671158	29672936
1	29697336	29698337
1	29743894	29751166
1	29836006	29836528
1	29854933	29855621
1	29890035	29890618
1	29935714	29938137
1	30855707	30856315
1	30856886	30857768
1	30922504	30924806
1	30925101	30925424
1	30933471	30935514
1	30936540	30937314
1	30937528	30938376
1	30963700	30964260
1	30983197	30983668
1	31184555	31186123
1	31211727	31212284
1	31511938	31515277
1	31515626	31516361
1	31516724	31519981
1	31583563	31585018
1	31665992	31667678
1	31674316	31675921
1	31795717	31797636
1	31810269	31810901
1	31816188	31817117
1	31819178	31821652
1	31824471	31826149
1	31826391	31830093
1	31834771	31835797
1	31863691	31864126
1	31868912	31869567
1	31869988	31871399
1	31871627	31872355
1	31890028	31891520
1	31959123	31960758
1	32154750	32156456
1	32185897	32188296
1	32245451	32246614
1	32246833	32247645
1	32253990	32254680
1	32281177	32281516
1	32360525	32362531
1	32386999	32387478
1	32387934	32388368
1	32417662	32419960
1	32461054	32463305
1	32476541	32478225
1	32496267	32497997
1	32512006	32512709
1	32525976	32526815
1	32527418	32530668
1	32531352	32532039
1	32564182	32564657
1	33316912	33319277
1	33505991	33506654
1	33583352	33586699
1	33586957	33590829
1	33592774	33593576
1	33594170	33595278
1	33599453	33601245
1	33603862	33604874
1	33605009	33610598
1	33610766	33612550
1	33614512	33618249
1	33618959	33619340
1	33619579	33619920
1	33620371	33621827
1	33629156	33633209
1	33636115	33637606
1	33638422	33638852
1	33639760	33641013
1	33642233	33642857
1	33646774	33647452
1	33654313	33656269
1	33657476	33657916
1	33658181	33658690
1	34359019	34359527
1	34692659	34695516
1	34695976	34697582
1	35852281	35853959
1	35924840	35928408
1	36066630	36066870
1	36067079	36067701
1	36695335	36696574
1	37001128	37002885
1	37022751	37025525
1	37042209	37045366
1	37054701	37055432
1	37067700	37070645
1	37130757	37132356
1	37132583	37134213
1	37168563	37169548
1	37185502	37186090
1	37187705	37189030
1	37192300	37195480
1	37201314	37203687
1	37205174	37205647
1	37230788	37231240
1	37231656	37232243
1	37232428	37233245
1	37640597	37641807
1	37667850	37668330
1	37761223	37761764
1	37780828	37781775
1	37885934	37886511
1	37886672	37887402
1	37887631	37890395
1	37903966	37904504
1	37909415	37914610
1	37967974	37970216
1	39836459	39836849
1	39837097	39838633
1	39859936	39860782
1	39866837	39869618
1	39870070	39870869
1	39872705	39873330
1	39888795	39889775
1	39890111	39890924
1	39926054	39926801
1	40021810	40023079
1	40098864	40100484
1	40179128	40181128
1	40731325	40733178
1	40998562	41002149
1	41057047	41058651
1	42723944	42726464
1	42728196	42734690
1	42737749	42738276
1	42914694	42915194
1	42922264	42923979
1	43171506	43172451
1	43212901	43214820
1	43255123	43255993
1	43259510	43260265
1	43260600	43261900
1	43273685	43274967
1	43279846	43283765
1	43290488	43290990
1	43299178	43300146
1	43300575	43302004
1	43308700	43309895
1	43311001	43312334
1	43332262	43336465
1	43336740	43337792
1	43338164	43343165
1	43358109	43361080
1	43374816	43375964
1	43391969	43394003
1	43600660	43601635
1	44057095	44057889
1	44183088	44183730
1	44183921	44186828
1	44238220	44240477
1	44302629	44303557
1	44337489	44337965
1	44372268	44374289
1	44938151	44938950
1	44939783	44941038
1	45169234	45172036
1	45218165	45220690
1	49976982	49978520
1	50045565	50046114
1	50578820	50580751
1	50643786	50644319
1	50721145	50722662
1	50781016	50782929
1	50907001	50907687
1	50908180	50909078
1	50911517	50912043
1	50917974	50918461
1	50921140	50922226
1	51232167	51232739
1	51254694	51256757
1	51261379	51262520
1	51267298	51267655
1	51267839	51269139
1	51269407	51270418
1	51293487	51294059
1	51294392	51295385
1	51296391	51297200
1	51303211	51304695
1	51311859	51315303
1	51427425	51429263
1	51479829	51482127
1	51484092	51487142
1	51505045	51505755
1	52433585	52436717
1	52491998	52492512
1	52896562	52897277
1	53097596	53098422
1	53256399	53257490
1	53441693	53443172
1	53865072	53867278
1	53868657	53869853
1	53875506	53876209
1	54400255	54400999
1	54545477	54548162
1	54596189	54598999
1	54632340	54634344
1	55613945	55615806
1	55616550	55619816
1	55753851	55754626
1	55821514	55822044
1	55859242	55860937
1	55981184	55982746
1	56066429	56067436
1	56067883	56070989
1	56092000	56093192
1	56093469	56094930
1	56112996	56114350
1	56115976	56116428
1	56177503	56178983
1	56188444	56189022
1	56491807	56492943
1	57060787	57063839
1	57079526	57079845
1	57097256	57099951
1	57110550	57111349
1	57126822	57130937
1	57165032	57166284
1	57188700	57189547
1	57363024	57365814
1	57423069	57424351
1	57437749	57438832
1	57654186	57655229
1	57825066	57827036
1	57833283	57835025
1	57950711	57952513
1	57952821	57953269
1	57960208	57961097
1	57990252	57990959
1	58001978	58002941
1	58003707	58005065
1	58005442	58008215
1	58200318	58202714
1	58202988	58205422
1	58270283	58270932
1	58279416	58282928
1	58343544	58344059
1	58344435	58345711
1	58346325	58347868
1	58546943	58548204
1	58569056	58570421
1	62887324	62888671
1	63638501	63639698
1	63973047	63974421
1	64044223	64045470
1	64078078	64079733
1	64459112	64461394
1	65934944	65936134
1	66308420	66309867
1	66345672	66346706
1	66380592	66382966
1	66454071	66455396
1	66460027	66461160
1	66497820	66499734
1	66513788	66514229
1	66515515	66516247
1	67655831	67657961
1	71103882	71105172
1	71359850	71360705
1	71399633	71400349
1	71635390	71636918
1	71658199	71658794
1	72011225	72011897
1	72020224	72020983
1	72026585	72028089
1	72041798	72044556
1	72052892	72053904
1	72060085	72060944
1	72062805	72064681
1	72066195	72068959
1	72069226	72070453
1	72086661	72087240
1	72097296	72100100
1	72100538	72102392
1	72104069	72104928
1	72105206	72105877
1	72106301	72108907
1	72109211	72109683
1	72110127	72111424
1	72111757	72112403
1	72131627	72132748
1	72139098	72139992
1	72140407	72142208
1	72146010	72147729
1	72197536	72200366
1	72209128	72210942
1	72212086	72214273
1	72219480	72223366
1	72255628	72256423
1	72310353	72315026
1	72322625	72325100
1	72354154	72354530
1	72385234	72386563
1	72519302	72521161
1	72552593	72553110
1	72698541	72702576
1	72705632	72706850
1	72707117	72708019
1	72741730	72743355
1	72814871	72816334
1	73124350	73125270
1	73160701	73163849
1	73164500	73165907
1	73213181	73215295
1	73216008	73216467
1	73216756	73217651
1	73220014	73222334
1	73509526	73511559
1	73548557	73550746
1	73733813	73734650
1	73820613	73821669
1	73827280	73828250
1	73841171	73842476
1	73882962	73885436
1	73888564	73889365
1	73965894	73966411
1	73982192	73983507
1	74077043	74079925
1	74179528	74181615
1	74242585	74243235
1	74347428	74350197
1	74366914	74368506
1	74610343	74611084
1	74625772	74631429
1	74635457	74637506
1	74653465	74662710
1	74663821	74666583
1	74675789	74677203
1	74682780	74683393
1	74683616	74684352
1	74697908	74699006
1	74708017	74711707
1	74717911	74718646
1	74721078	74723829
1	74725013	74731292
1	74743970	74744545
1	74750066	74751747
1	74752081	74754028
1	74760707	74762460
1	74764701	74765598
1	74772756	74775442
1	74923711	74924419
1	74963789	74964455
1	74964530	74968509
1	74970332	74971377
1	74971809	74974706
1	74988492	74989309
1	74990415	74991084
1	74992529	74993850
1	74994224	74995694
1	74998543	74999527
1	75010417	75013027
1	75014653	75015007
1	75071160	75072200
1	75076535	75079637
1	75139034	75139594
1	75148035	75150469
1	75163257	75163757
1	75168987	75171473
1	75229188	75230525
1	75320290	75322916
1	75323276	75323790
1	75330371	75331496
1	75342531	75343391
1	75408293	75410255
1	75414884	75419377
1	75419631	75420466
1	75420826	75422388
1	75455353	75455798
1	75456357	75459434
1	75507862	75510945
1	75520475	75524633
1	75546940	75549553
1	75693166	75694937
1	76179231	76182522
1	76186928	76187403
1	76298473	76299895
1	76367264	76369080
1	76791870	76794607
1	76838859	76842003
1	76895922	76897813
1	76916634	76918244
1	76998024	76999054
1	77158523	77160151
1	77333446	77334237
1	77398405	77403601
1	77511365	77515572
1	77530211	77531073
1	77535765	77536815
1	77537202	77542092
1	77588938	77589719
1	77601094	77602692
1	77604893	77611440
1	77626138	77626957
1	77628613	77629145
1	77630188	77632436
1	77634537	77636612
1	77651660	77656244
1	77656372	77658000
1	77661296	77661847
1	77662690	77670330
1	77672089	77673574
1	77690555	77691811
1	77706552	77707477
1	77733417	77734569
1	77752733	77756866
1	77757134	77758591
1	77763370	77769752
1	77785000	77786465
1	77786911	77790577
1	77808357	77810965
1	77920890	77921230
1	77941700	77942504
1	77945651	77946966
1	77961619	77964229
1	77965378	77967608
1	77968299	77969125
1	77980105	77981586
1	77996801	77998263
1	78047859	78048841
1	78217044	78218345
1	78218589	78225490
1	79424642	79426532
1	79498224	79499549
1	79534133	79534643
1	79563442	79564269
1	79564605	79566892
1	79569264	79570847
1	79632613	79633565
1	79657943	79658715
1	79659117	79660576
1	79668329	79668726
1	79683787	79684158
1	79686860	79689700
1	79698382	79698983
1	79729039	79732825
1	79734629	79735717
1	79785508	79789358
1	79789836	79793832
1	79817940	79819431
1	79824445	79825246
1	79831817	79832454
1	79836852	79837546
1	79900396	79902399
1	81745620	81746634
1	81766813	81768689
1	81892153	81893261
1	81908251	81910133
1	81933765	81934948
1	81935034	81935856
1	81972378	81973733
1	81975546	81976316
1	81976785	81977703
1	81996421	81998677
1	82004614	82005374
1	82008622	82009070
1	82083410	82083906
1	82084241	82087668
1	82088485	82089041
1	82108130	82109838
1	82125880	82127028
1	82131786	82132306
1	82160229	82163193
1	82799481	82800895
1	83002577	83004580
1	83136529	83137449
1	83140172	83141558
1	83849090	83851311
1	83972474	83974616
1	84172771	84173591
1	84217218	84217721
1	84217905	84218990
1	84219940	84220990
1	84221253	84222076
1	84236833	84237589
1	84258043	84259596
1	84391669	84393104
1	84451176	84453621
1	84465528	84466770
1	84525588	84526335
1	84543886	84547056
1	86016606	86018264
1	86124817	86126250
1	86163347	86164825
1	86480819	86482081
1	86607219	86607720
1	86607979	86608593
1	86954674	86956084
1	87023861	87024547
1	87115176	87119772
1	87270328	87271589
1	87329038	87330197
1	90136688	90138481
1	90298617	90301161
1	90426489	90430451
1	90432714	90437108
1	90495364	90496754
1	90497072	90507381
1	90649738	90652181
1	90663036	90664834
1	90666660	90668923
1	90695805	90697461
1	90743518	90746177
1	92240236	92242009
1	92285961	92287668
1	92327756	92328248
1	92343205	92347241
1	92350579	92353463
1	92417755	92419630
1	92420079	92423486
1	92423573	92424322
1	92471812	92472776
1	92482870	92484265
1	94294734	94296585
1	95616075	95617461
1	95685590	95686538
1	95726936	95728435
1	95749583	95751621
1	95755852	95757002
1	95808297	95810609
1	95940601	95941298
1	95961300	95962250
1	96544376	96546619
1	96566851	96567534
1	96728360	96730440
1	96762417	96764552
1	97342526	97343311
1	97361936	97366078
1	97371165	97371638
1	97371694	97372494
1	97509735	97513725
1	97601242	97603118
1	97604619	97605705
1	97606812	97608375
1	97611642	97612775
1	97613871	97615033
1	97734662	97735585
1	98015236	98015910
1	98132997	98135739
1	98374557	98378418
1	98383468	98385295
1	98393335	98393841
1	98395557	98396970
1	98408302	98409415
1	98417655	98419193
1	98419493	98421435
1	98431909	98435541
1	98461787	98463538
1	98479979	98480926
1	98488377	98489789
1	98490879	98491203
1	98496081	98497053
1	98515223	98518326
1	98518605	98522755
1	98524727	98528819
1	98532909	98533526
1	98535481	98537086
1	98539341	98545057
1	98546519	98547675
1	98568328	98569692
1	99023261	99025098
1	99028005	99028373
1	99032218	99032772
1	99042315	99043861
1	99047233	99048891
1	99142164	99142687
1	99226828	99228955
1	99229810	99230455
1	99243882	99244685
1	99262266	99262929
1	99309457	99312671
1	99809357	99810264
1	99817845	99818175
1	99899312	99901432
1	99915967	99917816
1	99938963	99941500
1	99975028	99976739
1	100418963	100421430
1	100422497	100425045
1	100514205	100515632
1	100562242	100562806
1	100573465	100575179
1	100639252	100640279
1	100655891	100656736
1	100697210	100701608
1	103672374	103673615
1	103750927	103753058
1	103789644	103791098
1	103793425	103796914
1	103860700	103862584
1	104473871	104474713
1	104730100	104739676
1	104811866	104819294
1	104823946	104825457
1	104832052	104835014
1	104842300	104842867
1	104893935	104895358
1	104909644	104917612
1	104965216	104965655
1	104966816	104970256
1	104992724	104996960
1	104997614	104998226
1	105000569	105010923
1	105072467	105080763
1	105237097	105239345
1	105291689	105292582
1	106011740	106014200
1	106034867	106037352
1	106038338	106038797
1	106046723	106047393
1	106047774	106050282
1	106050584	106052062
1	106892112	106892990
1	106897283	106899151
1	106927218	106929635
1	106932446	106934382
1	106966999	106968394
1	106970616	106971292
1	107010450	107013003
1	107138621	107139351
1	107153030	107154161
1	107159349	107160899
1	107161177	107170667
1	107174256	107175324
1	107178046	107190222
1	107191854	107193105
1	107193396	107201788
1	107202045	107204436
1	107204719	107210405
1	107216100	107218564
1	107258195	107260172
1	107304969	107306194
1	107311368	107313834
1	107324038	107336215
1	107402444	107406242
1	107544808	107546758
1	107581719	107584152
1	107653754	107655206
1	107688970	107691247
1	107747509	107747920
1	107885873	107886469
1	107886702	107887956
1	107896871	107898140
1	107938636	107940943
1	107948809	107952515
1	107996992	107998660
1	108031012	108031703
1	108065132	108065809
1	108105607	108106549
1	108128648	108129329
1	108130447	108132635
1	108133022	108133442
1	108133715	108134551
1	108146582	108148943
1	108205338	108207498
1	108408453	108411720
1	108513825	108518750
1	108524296	108525306
1	108629150	108629581
1	108648901	108649500
1	108762629	108763726
1	108784871	108785610
1	108795149	108796603
1	108796672	108798774
1	108799083	108801553
1	108808454	108813597
1	108814791	108815909
1	108816091	108819106
1	108819533	108821671
1	108833399	108834116
1	108834574	108841641
1	108846022	108846655
1	108861299	108863371
1	108864701	108868099
1	108880420	108882860
1	108923269	108925106
1	108972505	108974637
1	109008740	109013228
1	109013504	109017097
1	109158745	109160393
1	109160652	109164408
1	109184963	109185626
1	109500589	109501626
1	109501852	109504013
1	109559256	109560812
1	109677845	109680986
1	109724341	109725635
1	109921321	109922764
1	109929804	109933670
1	109936215	109937889
1	109939010	109940822
1	110718660	110719890
1	111216703	111217109
1	111374477	111377404
1	111488993	111491240
1	111569499	111573126
1	111573631	111576680
1	111586146	111596315
1	111605028	111606458
1	111612455	111615035
1	111886980	111887774
1	112343269	112345568
1	112371047	112371960
1	112396108	112397968
1	112418886	112424499
1	112425784	112435242
1	112468396	112469195
1	112470089	112473154
1	112484103	112485052
1	112517973	112520250
1	112520614	112522369
1	112524251	112526629
1	112527460	112528462
1	112538798	112542026
1	112620023	112621503
1	112651690	112652956
1	112657612	112658212
1	112676998	112680718
1	112698497	112698986
1	112734879	112735800
1	112738190	112739194
1	112741092	112741412
1	112745539	112747861
1	112749059	112750528
1	112751447	112754522
1	112791253	112792324
1	112803690	112804579
1	112805136	112805851
1	112806139	112807679
1	112811083	112811723
1	112813164	112814755
1	112893422	112894815
1	112942340	112943389
1	113057775	113060434
1	113084330	113087443
1	113257115	113259344
1	113288425	113288864
1	113289178	113291076
1	113450459	113453207
1	113465222	113466100
1	113489622	113492004
1	113507793	113509983
1	113555675	113559836
1	113573583	113574989
1	113602507	113604885
1	113835068	113836609
1	113837471	113837883
1	113848039	113848852
1	113851185	113852919
1	113932639	113933899
1	114067025	114067692
1	114068765	114069476
1	114180785	114181648
1	114265796	114267600
1	114362217	114364120
1	114598353	114599432
1	114669155	114669707
1	114787142	114787653
1	114943927	114945896
1	114978460	114983696
1	114983959	114986153
1	115019090	115019840
1	115054667	115057196
1	115077683	115080053
1	115219170	115221994
1	115471934	115472860
1	115606821	115608407
1	115710392	115710718
1	115732794	115735513
1	115941281	115945113
1	116131701	116132870
1	116292545	116294104
1	116332138	116332857
1	116448162	116450961
1	116451906	116452659
1	116453313	116454383
1	116518300	116520894
1	116532249	116533993
1	116560101	116561012
1	116611513	116613578
1	118897933	118898950
1	118968508	118970181
1	118970563	118971249
1	119020191	119023655
1	119050228	119053097
1	119133954	119136469
1	119165142	119167015
1	119218459	119220473
1	119221251	119222022
1	119360963	119362299
1	119363104	119364843
1	119545246	119546920
1	119757949	119760286
1	119804221	119805890
1	119917544	119919550
1	119923241	119927838
1	119946665	119949016
1	120008808	120009627
1	120025766	120027325
1	120137789	120138954
1	120806928	120808164
1	120944935	120947081
1	121067183	121069367
1	121145248	121147891
1	121223830	121226244
1	121226503	121226882
1	121375188	121377297
1	121411913	121415884
1	121524339	121525601
1	121578663	121579333
1	121653359	121657206
1	121660233	121660662
1	121690454	121692253
1	121720942	121721597
1	121722653	121726914
1	121728462	121729123
1	121866567	121867996
1	121921865	121923147
1	122138162	122140330
1	122525855	122527102
1	122541552	122543327
1	122633368	122635715
1	122726071	122727175
1	122811325	122812607
1	122876271	122877480
1	123100776	123104866
1	123314381	123315398
1	123460835	123463122
1	123600574	123601747
1	124041164	124045526
1	126116952	126118978
1	126127721	126130949
1	126133884	126137913
1	126172564	126173700
1	126174024	126174936
1	126183877	126185881
1	126236230	126238271
1	126288929	126289474
1	126292804	126293534
1	126294701	126295483
1	126307388	126308270
1	126321722	126322771
1	126322864	126323813
1	126333500	126336044
1	126361403	126363262
1	126471117	126471975
1	126541039	126543498
1	126549055	126550863
1	126570023	126572369
1	126617220	126618378
1	126643430	126644234
1	126700147	126701207
1	126824590	126826882
1	126844070	126845401
1	126871611	126872784
1	126889986	126892545
1	126901187	126903593
1	127018054	127020131
1	127123895	127126539
1	127237441	127239377
1	127367056	127367677
1	127739146	127742569
1	127758987	127761690
1	127764234	127768587
1	127780579	127781897
1	127812602	127815398
1	127865471	127866428
1	127929347	127931298
1	127936383	127937892
1	127958033	127959309
1	128082683	128085556
1	128125082	128126922
1	128268379	128270339
1	128304958	128306704
1	128331112	128333243
1	128488896	128490579
1	128640211	128642862
1	128768218	128769449
1	128776605	128779203
1	128789142	128790152
1	128798493	128800492
1	128806895	128810411
1	128816690	128817440
1	128838114	128840475
1	128868959	128871855
1	128881265	128882661
1	128882922	128884091
1	128885891	128886905
1	128887227	128889577
1	128893368	128894637
1	129011036	129014862
1	129097124	129099637
1	129143840	129145061
1	129169245	129170154
1	129363107	129364138
1	129373566	129377751
1	129380191	129382802
1	129383026	129383422
1	129391364	129392421
1	129403147	129405908
1	129419911	129420768
1	129421023	129425595
1	129425949	129426875
1	129427317	129428902
1	129429248	129433145
1	129434175	129437850
1	129441559	129443160
1	129443267	129444063
1	129522561	129524022
1	129532258	129534258
1	129551126	129551970
1	129553939	129555677
1	129556083	129560939
1	129586831	129589335
1	129589656	129590053
1	129695487	129698096
1	129762210	129763317
1	129782346	129784775
1	129800484	129801090
1	129827878	129829768
1	129838163	129839276
1	129874263	129876409
1	129941542	129943325
1	129967662	129969083
1	130035265	130036211
1	130036487	130037064
1	130064052	130066668
1	130111289	130113988
1	130200071	130203306
1	130252749	130253749
1	130309056	130309864
1	130362927	130363763
1	130373001	130376686
1	130376931	130377516
1	130384330	130388249
1	130394554	130400266
1	130405146	130408683
1	130417202	130420655
1	130443528	130444169
1	130473530	130474137
1	130515811	130517312
1	130562554	130564509
1	130574285	130575232
1	130639611	130640827
1	130746089	130747558
1	130752248	130754135
1	130804089	130805200
1	130843600	130844896
1	130846044	130847984
1	130871992	130874692
1	130877837	130879046
1	130909663	130910669
1	130929018	130929958
1	130939432	130940960
1	130974230	130977069
1	130990682	130993797
1	131003902	131006696
1	131027596	131028276
1	131028872	131029276
1	131033211	131035325
1	131038327	131039374
1	131065749	131067108
1	131143853	131144620
1	131160182	131162198
1	131171290	131173704
1	131177487	131182755
1	131183225	131185054
1	131187452	131189209
1	131190390	131192029
1	131205099	131207652
1	131211305	131213585
1	131219555	131220534
1	131230859	131232302
1	131240820	131242422
1	131353519	131356567
1	131364336	131366445
1	131391649	131392582
1	131744844	131749122
1	131851781	131854252
1	131871880	131872354
1	132161332	132163171
1	132166998	132167753
1	132667876	132669134
1	132701851	132703483
1	132725332	132725748
1	132726086	132726715
1	132818353	132819591
1	132854206	132855024
1	132882764	132885686
1	132885827	132886542
1	132886888	132887886
1	133008393	133008815
1	133013676	133017137
1	133017324	133018819
1	133058270	133059417
1	133097680	133098474
1	133119179	133121495
1	133148456	133150280
1	133150301	133153753
1	133187287	133188114
1	133203170	133204638
1	133207689	133209829
1	133236418	133237715
1	133238094	133241270
1	133444167	133445835
1	133458216	133458800
1	134013272	134019844
1	134537108	134538901
1	135575595	135578955
1	136120624	136121950
1	136135531	136136785
1	136496389	136498258
1	137008142	137009472
1	137118344	137120306
1	137120638	137121481
1	137281140	137282110
1	137476654	137478023
1	137489210	137490874
1	137503738	137506441
1	137526910	137530135
1	137554170	137554552
1	137632354	137632903
1	137636094	137637290
1	137658446	137663212
1	137688583	137691788
1	137692337	137692825
1	137782179	137783309
1	137824841	137826842
1	137855718	137856719
1	137996419	138000203
1	138166988	138167868
1	138242793	138245571
1	138246208	138248030
1	138253725	138255698
1	138256386	138259477
1	138259695	138260253
1	138280224	138285108
1	138285418	138287698
1	138288256	138289761
1	138336968	138338695
1	138338829	138343471
1	138566606	138568061
1	138981487	138982001
1	138982611	138984324
1	138984492	138984895
1	139001834	139002516
1	139014040	139015486
1	139031350	139032639
1	139041908	139042349
1	139042615	139043213
1	139043718	139044692
1	139045379	139046760
1	139190337	139191227
1	139191771	139192527
1	139196752	139197501
1	139197823	139198387
1	139198955	139199393
1	139241495	139244627
1	139260741	139265861
1	139269044	139272706
1	139347492	139348401
1	139432779	139434833
1	139450886	139452485
1	139493846	139495571
1	139499378	139500122
1	139500471	139503912
1	139506705	139507651
1	139541668	139542370
1	139547941	139549677
1	139552382	139553121
1	139558038	139560167
1	139621279	139621887
1	139636688	139639108
1	139654342	139655385
1	139719594	139721467
1	139727070	139729331
1	139757751	139759309
1	139767308	139768527
1	139792447	139792882
1	139793796	139795492
1	139795721	139797617
1	139799900	139801179
1	139801811	139805548
1	139835549	139838192
1	141310328	141311421
1	141442661	141444738
1	141493069	141496561
1	141496815	141497977
1	141519211	141520158
1	141560935	141561489
1	141563273	141564324
1	141571744	141572931
1	141576229	141581096
1	141886018	141888567
1	143108531	143109855
1	143413040	143419429
1	143420520	143421220
1	143442060	143443123
1	143449650	143450381
1	143455053	143460580
1	143503774	143508321
1	143508422	143522854
1	143523077	143534777
1	143537038	143542541
1	143593811	143594431
1	143598473	143601589
1	143633048	143636259
1	143648725	143649411
1	143649855	143652013
1	143652344	143652822
1	143653376	143654618
1	143723168	143724154
1	143866855	143868963
1	143960843	143962023
1	143992332	143994255
1	144445408	144446175
1	144472970	144474813
1	145058470	145061026
1	145135815	145136433
1	145302311	145302785
1	145358921	145360749
1	145507968	145508506
1	145508791	145509451
1	145548856	145550589
1	145560500	145561964
1	145706391	145708852
1	145810428	145812588
1	145824928	145825450
1	145835168	145836805
1	145837957	145844359
1	145878956	145880345
1	145894894	145898761
1	145908583	145909997
1	145914844	145918709
1	145953734	145955383
1	145955797	145956624
1	145985995	145988926
1	145994822	146004666
1	146006598	146011198
1	146014209	146019142
1	146220696	146223263
1	146718916	146721689
1	147567991	147571899
1	147572156	147581450
1	147581778	147583644
1	147585638	147587937
1	147590977	147596043
1	147597233	147599774
1	147603545	147604434
1	147608497	147609739
1	147611454	147615756
1	147616387	147618389
1	147618669	147619583
1	147620037	147624195
1	147624392	147624701
1	147624930	147626729
1	147659649	147662097
1	147662471	147664520
1	147671107	147680096
1	147780402	147783869
1	147796366	147797059
1	147810625	147811279
1	147817618	147818183
1	147818524	147819613
1	147819869	147820817
1	147823052	147824036
1	147830881	147834383
1	147892716	147894479
1	147894794	147897159
1	147957336	147958562
1	147963051	147964601
1	147982751	147986196
1	147986503	147990367
1	147992593	147995341
1	148006425	148007352
1	148008611	148009104
1	148009913	148011472
1	148022502	148023349
1	148023668	148025510
1	148026888	148028614
1	148045704	148046750
1	148060923	148063363
1	148063509	148064674
1	148948057	148950666
1	148969365	148969803
1	148983770	148989773
1	148990855	148992636
1	149506283	149506699
1	149506916	149508641
1	149516059	149518035
1	149579078	149580329
1	149580782	149584864
1	149736833	149738906
1	149855129	149857402
1	152635201	152637291
1	152688861	152690310
1	153987479	153988928
1	154918504	154920078
1	157832623	157837992
1	157853530	157854163
1	157854599	157854993
1	158094550	158095831
1	158232516	158234302
1	158287780	158289800
1	158313762	158314583
1	158315005	158315905
1	158334911	158339966
1	158412707	158416867
1	158439825	158440136
1	158453622	158455988
1	158469289	158469894
1	158470211	158471011
1	158481731	158484752
1	158485375	158487348
1	158498104	158500080
1	158506125	158506481
1	158511230	158512029
1	158641128	158641859
1	158684059	158687447
1	158724441	158725227
1	158735899	158738503
1	158740159	158740623
1	158742338	158743362
1	158743881	158747859
1	158788567	158789045
1	158859680	158862520
1	158862900	158863864
1	158948750	158950020
1	159011410	159012207
1	159018250	159024488
1	159037690	159040566
1	159040944	159045746
1	159058991	159059403
1	159077265	159078901
1	159087144	159088205
1	159093715	159096365
1	159098978	159101586
1	159115968	159118022
1	159124397	159124868
1	159133097	159134153
1	159141630	159144938
1	159156918	159158370
1	159176499	159177161
1	159177496	159184612
1	159184898	159187958
1	159195580	159196823
1	159218214	159219479
1	159219817	159221039
1	159221863	159222273
1	159225390	159226024
1	159316531	159318768
1	159529243	159532309
1	159551641	159552687
1	159575186	159575464
1	159577557	159578713
1	159588341	159588781
1	159632932	159634009
1	161177740	161180443
1	161186679	161189888
1	161194837	161195473
1	161198153	161200194
1	161201157	161204161
1	161320365	161321068
1	161560083	161560683
1	161606238	161608050
1	161768411	161769758
1	161942128	161944541
1	161944872	161955145
1	161955962	161959116
1	161974191	161982208
1	161982746	161985565
1	162057070	162064053
1	162143826	162145971
1	162259047	162261618
1	162263831	162265104
1	162265424	162267541
1	162267587	162268397
1	162273294	162273773
1	162278992	162280002
1	162335451	162337545
1	162338604	162339960
1	162340088	162342028
1	162492142	162492531
1	162735018	162737125
1	162935406	162937983
1	162962531	162966629
1	163102758	163104243
1	163168611	163170998
1	163219773	163223438
1	163282159	163283855
1	163315775	163321218
1	163325811	163328527
1	163334061	163335692
1	163335939	163338540
1	163340481	163341177
1	163369717	163370742
1	163390934	163392589
1	163434504	163436341
1	163516440	163518303
1	163525416	163526786
1	163602063	163604342
1	163788539	163791652
1	163798839	163799721
1	163800954	163805955
1	163811944	163814093
1	163814378	163815894
1	163816608	163818225
1	163823976	163825515
1	163857074	163860867
1	163899031	163899517
1	164309553	164311872
1	164368440	164369737
1	164374470	164375612
1	164381169	164383630
1	164400415	164402500
1	164404466	164406144
1	164441544	164443418
1	164449454	164451645
1	164456076	164458985
1	164469496	164470555
1	164473924	164475967
1	164480111	164482430
1	164577958	164579175
1	164580110	164581981
1	164583263	164586976
1	164592979	164593654
1	164618947	164619804
1	164654294	164662432
1	164662663	164663939
1	164666240	164667537
1	164667746	164668534
1	164669930	164671080
1	164673231	164674540
1	164683090	164685562
1	164687736	164688961
1	164689232	164691770
1	164692002	164694696
1	164694871	164697548
1	164697788	164703220
1	164703611	164705647
1	164705881	164707517
1	164708271	164713415
1	164713683	164721151
1	164725703	164730855
1	164731102	164734257
1	164742480	164743078
1	164751526	164752450
1	164752752	164755471
1	164770586	164771199
1	164771852	164772332
1	164781894	164784267
1	164790264	164791745
1	164792676	164794931
1	164834359	164835531
1	164955698	164957350
1	164962048	164962686
1	164962803	164964394
1	164964665	164965516
1	164965930	164967053
1	164973953	164975987
1	164977607	164978454
1	164978743	164980404
1	164981015	164982266
1	164985736	164988146
1	164996392	165000974
1	165006393	165008859
1	165012102	165013065
1	165016830	165017810
1	165024808	165027440
1	165031753	165033241
1	165036501	165040602
1	165049981	165051952
1	165053970	165061190
1	165062752	165063624
1	165071580	165074483
1	165078531	165081579
1	165082268	165084849
1	165085489	165087364
1	165088869	165090366
1	165094046	165097870
1	165103377	165103996
1	165105428	165109281
1	165112461	165120659
1	165121563	165122311
1	165122528	165126293
1	165129811	165132008
1	165132475	165135411
1	165135621	165139385
1	165181632	165182427
1	165191815	165193581
1	165436175	165438322
1	165457140	165459306
1	165462345	165462904
1	165756912	165758048
1	165762688	165764250
1	165766626	165768706
1	165774775	165775881
1	165782412	165783418
1	165809655	165810328
1	165858606	165859901
1	165957058	165958565
1	166093391	166094196
1	166096621	166097871
1	166098496	166100978
1	166103087	166103542
1	166105758	166106115
1	166107009	166108781
1	166111052	166113626
1	166124975	166128293
1	166129544	166129878
1	166147607	166148758
1	166161625	166164010
1	166309433	166311192
1	166368686	166369402
1	166429055	166429965
1	166464648	166469173
1	166532095	166535281
1	166535789	166536735
1	166543379	166544485
1	166569311	166573818
1	166582545	166586488
1	166588841	166590030
1	166605649	166612026
1	166672581	166676484
1	166696717	166702095
1	166936911	166938480
1	166942547	166943556
1	166943708	166945167
1	166945786	166946296
1	167007272	167009403
1	167154258	167155398
1	167160041	167161979
1	167162563	167163358
1	167222442	167224246
1	167239268	167240940
1	167295313	167297264
1	167301037	167302218
1	167305594	167306052
1	167307283	167308187
1	167317362	167317748
1	167406710	167407273
1	167407631	167408500
1	167413930	167415081
1	167415933	167416486
1	167431194	167435063
1	167435556	167436664
1	167497985	167504853
1	167505276	167508529
1	167522864	167523603
1	167523902	167525361
1	167525626	167528430
1	167529274	167530603
1	167531985	167535841
1	167536120	167539150
1	167595086	167597805
1	167598016	167600604
1	167852982	167857685
1	167858238	167859581
1	167864415	167865029
1	167866362	167869024
1	167869439	167870462
1	167889645	167890927
1	167891796	167892899
1	167944215	167945428
1	167958254	167959512
1	167993666	167995076
1	167995495	167996954
1	168002392	168002896
1	168011725	168016449
1	168185247	168185938
1	168200249	168202574
1	168207501	168208462
1	168211590	168214661
1	168214929	168222312
1	168222922	168223788
1	168224191	168225166
1	168225839	168228845
1	168239987	168241512
1	168241785	168244414
1	168451555	168453554
1	168484750	168489784
1	168513728	168515584
1	168528178	168532521
[truncated: 34,032 more rows]

## Sheet: Differential peaks
Chromosome	Start site	End site	P-Value
4	101917541	101925468	3.92276e-10
13	87743724	87749519	4.75453e-10
16	77696092	77700926	5.27046e-10
13	87756194	87760916	4.47489e-09
4	101925875	101928892	5.2738e-09
13	87726804	87730617	7.42399e-09
18	31886857	31892668	2.49345e-08
13	87731203	87733679	4.54167e-08
4	58219529	58222283	8.84111e-08
7	31454168	31463968	2.03564e-07
9	88278254	88285620	2.11508e-07
12	26380537	26393938	2.93823e-07
15	138239241	138245773	4.6115e-07
4	93383385	93389600	4.8205e-07
15	24401441	24408089	5.94196e-07
4	101899920	101903661	6.58929e-07
15	24408498	24414785	6.61887e-07
2	45055276	45056877	9.91737e-07
16	79499982	79503618	1.05701e-06
15	23792143	23794096	1.43455e-06
5	91748551	91755093	1.54122e-06
15	124912391	124919340	1.74418e-06
6	31044094	31048010	1.7531e-06
5	91676980	91683586	1.91046e-06
15	119032912	119037221	1.97824e-06
3	72958963	72962763	2.05273e-06
1	648431	649709	2.14648e-06
4	80493164	80504303	2.16061e-06
1	759922	761566	2.17596e-06
7	14085215	14090950	2.67714e-06
1	73964118	73968823	3.02892e-06
12	26404543	26411022	3.60274e-06
14	44867404	44870986	3.91474e-06
11	4288848	4292691	4.04551e-06
1	274060405	274065206	4.08256e-06
14	106751811	106759431	4.8321e-06
14	106766880	106778190	4.99679e-06
15	81957578	81962441	5.08764e-06
15	138226240	138233446	5.61606e-06
3	39754512	39761592	5.83013e-06
3	38735522	38737967	5.93476e-06
8	132670048	132672268	5.94544e-06
4	75507306	75510490	6.03017e-06
12	3156414	3162384	6.15118e-06
2	66030796	66042823	6.23856e-06
6	40752200	40754796	6.27989e-06
16	28775249	28779061	6.93375e-06
1	794764	797780	7.1282e-06
3	27456727	27461869	7.56007e-06
11	78914847	78920174	7.57621e-06
17	51526740	51532400	7.6482e-06
1	269884730	269888542	7.71126e-06
14	63764872	63766160	7.71127e-06
12	26414144	26419846	8.67424e-06
6	25931571	25935786	8.84704e-06
4	36562543	36568802	9.14231e-06
12	26394442	26399258	9.25126e-06
2	73877994	73883650	9.26784e-06
9	74143792	74147693	1.0769e-05
15	130397229	130399665	1.10835e-05
12	11456043	11457689	1.12144e-05
1	267729378	267735874	1.26835e-05
7	40338272	40341958	1.34246e-05
8	135078768	135079688	1.45676e-05
5	53039926	53043227	1.52077e-05
15	67164461	67166469	1.52817e-05
4	58350911	58352321	1.53855e-05
4	58216950	58217850	1.57084e-05
3	18398469	18405048	1.59065e-05
5	91770299	91774030	1.64222e-05
13	199391374	199395000	1.64417e-05
3	119516154	119518969	1.64661e-05
1	710405	712697	1.70281e-05
2	65987214	66003115	1.72164e-05
4	59576396	59581188	1.72164e-05
13	147202983	147212126	1.74231e-05
3	27294281	27298141	1.77986e-05
12	11453516	11455301	1.83854e-05
6	13724568	13734960	1.86883e-05
1	273942052	273948899	1.94063e-05
14	106789949	106795220	1.97921e-05
16	78305964	78306988	2.00967e-05
11	44184717	44188916	2.05335e-05
4	68197532	68203210	2.09624e-05
13	46465685	46474843	2.10665e-05
1	53868658	53869853	2.13996e-05
7	26800789	26803323	2.33871e-05
2	70739583	70743587	2.34417e-05
1	267600584	267606214	2.43439e-05
15	138233676	138237462	2.48866e-05
1	2825990	2828951	2.5054e-05
15	128228204	128231725	2.51037e-05
1	9328280	9331562	2.57171e-05
7	31451193	31453924	2.86649e-05
1	77585974	77592998	2.8769e-05
4	117476934	117483277	2.91333e-05
1	273981368	273986643	2.94202e-05
13	54901445	54905342	3.02786e-05
1	268688355	268693476	3.05718e-05
7	59211730	59213559	3.12708e-05
12	47965880	47968269	3.27005e-05
8	133499255	133502538	3.27651e-05
9	45519301	45522872	3.35504e-05
18	45399576	45400467	3.36585e-05
5	22933275	22937865	3.39334e-05
6	30511808	30516367	3.40326e-05
7	64537294	64544357	3.42197e-05
3	96852574	96857768	3.45792e-05
4	89249432	89254878	3.5091e-05
15	93575888	93578599	3.53043e-05
18	44388372	44392341	3.61862e-05
3	75473871	75477300	3.68833e-05
2	28410606	28413358	3.75129e-05
14	89375569	89380449	3.77749e-05
3	32068891	32072405	3.88375e-05
15	31002265	31005813	3.92567e-05
6	51973556	51979954	4.02978e-05
1	17349727	17353506	4.0683e-05
6	73017913	73021872	4.07224e-05
13	206506401	206511476	4.1046e-05
9	10142127	10147884	4.12116e-05
3	75393228	75394315	4.13155e-05
9	64969909	64971332	4.15014e-05
8	12360424	12365321	4.17109e-05
16	74929830	74932825	4.27675e-05
5	32312188	32314121	4.39798e-05
3	72669298	72672000	4.41431e-05
2	45052072	45053636	4.46806e-05
2	175540	180358	4.49007e-05
6	75613355	75616285	4.50894e-05
1	76337979	76342131	4.57992e-05
2	65960956	65966056	4.59813e-05
10	30499134	30499936	4.6199e-05
9	7252466	7256766	4.73227e-05
6	40745864	40749182	4.77437e-05
10	28706424	28709660	4.85223e-05
17	52159774	52163459	4.87275e-05
15	124986352	124987758	4.91049e-05
13	177511027	177512408	4.94487e-05
16	46231075	46240246	4.97814e-05
4	16518413	16522514	4.98005e-05
7	111910284	111914131	5.0434e-05
1	254052947	254058758	5.04626e-05
2	45057334	45058477	5.06842e-05
7	120767262	120772472	5.18192e-05
12	60938282	60941069	5.22235e-05
17	35487189	35492557	5.24655e-05
13	199400729	199404887	5.32017e-05
14	42189468	42194742	5.46468e-05
4	59240725	59242289	5.50974e-05
13	202705996	202712237	5.59115e-05
15	119622942	119624199	5.59671e-05
13	126671312	126674170	5.77993e-05
3	32094913	32098463	5.83611e-05
15	137138102	137146710	5.84301e-05
6	140777277	140782423	5.89093e-05
9	10730713	10735104	5.94752e-05
6	134775623	134777321	5.96856e-05
4	101682744	101685236	5.97084e-05
9	124383793	124386851	6.0034e-05
5	91626285	91628165	6.07528e-05
11	69921302	69923163	6.08319e-05
12	11459164	11462044	6.12216e-05
16	65383142	65383808	6.13941e-05
1	166509874	166511344	6.14842e-05
2	85956690	85958913	6.1913e-05
12	48322583	48332896	6.20686e-05
13	109810398	109812229	6.21712e-05
9	50091012	50094574	6.33906e-05
12	11466767	11469456	6.39846e-05
5	7023043	7027185	6.4046e-05
1	21380106	21382689	6.42041e-05
6	76103430	76111096	6.43511e-05
7	31470721	31474526	6.47401e-05
9	114776759	114783384	6.56116e-05
6	13676749	13692962	6.64169e-05
9	92032931	92040698	6.6635e-05
12	26399533	26402529	6.68794e-05
1	205923212	205927444	6.80796e-05
6	69808077	69812479	6.81195e-05
13	8143046	8144817	6.83503e-05
14	31909102	31913127	6.86772e-05
17	9450737	9461362	6.93893e-05
9	57287479	57291649	7.03933e-05
13	199073856	199078879	7.05103e-05
9	47320302	47325491	7.0614e-05
14	111446733	111449778	7.09923e-05
15	70391056	70395112	7.1438e-05
16	46147868	46152396	7.20592e-05
4	102644401	102645711	7.21593e-05
2	151575347	151586562	7.22438e-05
1	267205562	267207155	7.43978e-05
2	141506286	141511430	7.49746e-05
12	53911871	53915291	7.56844e-05
15	124984109	124986092	7.62971e-05
13	191645281	191647006	7.70041e-05
1	238823454	238827192	7.71114e-05
13	29518411	29520732	7.7825e-05
12	46814734	46818757	7.89324e-05
13	21703167	21705960	7.92515e-05
4	38563152	38563831	8.08314e-05
12	11301785	11306157	8.13866e-05
17	9487351	9489895	8.2062e-05
18	41788276	41790027	8.33967e-05
16	77694290	77695171	8.39443e-05
6	146690605	146692800	8.46041e-05
7	31464199	31470445	8.9417e-05
3	2022141	2028179	8.95294e-05
3	132362520	132372004	8.95682e-05
7	59135367	59141048	9.01738e-05
16	51016953	51018270	9.0776e-05
6	63821250	63824625	9.21633e-05
14	140764168	140767612	9.2809e-05
13	90573936	90576907	9.29942e-05
3	17511756	17516695	9.52852e-05
1	1380713	1382714	9.55019e-05
13	81912063	81917761	9.66823e-05
16	61463875	61465621	9.76236e-05
12	26456960	26461892	9.79244e-05
2	157223	159856	9.83819e-05
8	40962995	40971353	9.83844e-05
13	87754009	87754888	0.000106995
14	54596623	54599955	0.000107209
14	61792190	61795182	0.000107211
13	70836951	70844197	0.000108292
15	137097184	137105373	0.000108467
11	4279578	4281888	0.000109574
2	3835502	3839506	0.000109679
6	170161328	170164965	0.000110014
13	26467769	26469962	0.000110286
6	151242780	151248521	0.000110356
3	72674047	72677062	0.000110832
12	3182016	3185683	0.000111125
7	49972739	49976864	0.000112044
2	45297444	45299831	0.000113679
6	3883146	3884413	0.000114013
1	90662161	90669033	0.000116246
5	67203911	67205157	0.000116515
9	139334414	139337752	0.000117757
18	41794227	41796391	0.000118074
8	100900868	100902958	0.000119763
15	137001422	137006933	0.00012015
14	89737491	89739592	0.00012107
7	57653064	57657972	0.000122076
15	118876897	118878368	0.000122197
9	114532233	114535732	0.000122834
12	11604200	11608521	0.000123964
18	16767869	16770976	0.000124471
3	126634987	126636684	0.000128829
9	10808401	10817275	0.000129239
1	163234878	163239901	0.000130201
7	51841542	51846185	0.000130794
12	53821459	53822075	0.000130975
12	11223727	11228314	0.000132701
14	127649308	127653455	0.000132869
4	59570245	59572759	0.000135456
6	30084570	30089232	0.000135838
12	26447631	26450090	0.000136318
3	94436195	94447391	0.000137174
12	48206482	48210818	0.000139367
15	138250700	138252162	0.000140024
6	74912527	74917680	0.000141305
2	69610141	69616059	0.000142272
13	81991555	81993082	0.000142625
12	11526752	11530111	0.000142639
15	136884815	136887682	0.000143112
4	80543183	80544004	0.000143915
16	24707836	24714319	0.000144636
17	9461641	9471352	0.00014653
5	91791792	91793615	0.00014797
6	28045260	28056349	0.000149204
1	94294644	94296920	0.000149347
1	165016173	165022661	0.00014982
18	39662715	39665379	0.000153209
13	48024328	48027374	0.000154862
1	389707	392645	0.00015571
8	136436447	136439619	0.000156121
4	58896415	58905803	0.000156234
1	77955163	77960354	0.000157574
6	147318206	147322856	0.000158527
5	91623717	91625902	0.000163026
1	269892523	269898149	0.00016439
11	78931238	78934019	0.000166154
9	103049529	103053731	0.00016676
2	81201207	81202273	0.000167575
17	39149574	39154283	0.000173552
9	100845645	100848734	0.000174291
9	57126664	57132668	0.00017447
4	8531601	8533286	0.000175009
18	25876180	25877515	0.00017548
13	206466058	206471125	0.000176648
15	137020370	137024526	0.000176863
3	39853998	39868080	0.000179678
16	46876862	46877908	0.000180221
15	139762891	139769914	0.000180272
14	54613457	54619996	0.000180687
14	4222170	4223580	0.000181427
1	261725421	261741064	0.000181893
4	38457567	38467424	0.000182578
2	150570243	150577869	0.000182661
9	10772420	10782997	0.000182764
6	84174690	84181325	0.000182869
1	190161427	190164812	0.000184694
1	17356552	17359790	0.000189148
2	125605962	125608567	0.000189166
4	68177846	68180294	0.000191521
1	274000082	274005474	0.000191659
2	87346229	87353649	0.000193029
13	158063309	158064745	0.000193064
6	62780546	62782320	0.000194335
13	132177261	132183488	0.000195893
1	189621504	189625024	0.000196553
10	57365389	57371359	0.000196714
9	74172839	74176695	0.000197058
6	158431882	158433967	0.000198215
12	45404559	45409524	0.000200836
6	28108440	28115647	0.000201651
7	85940697	85943843	0.000201752
15	92122499	92126665	0.000205261
3	497760	502321	0.000207468
6	51363304	51379193	0.000207664
15	138238035	138238971	0.000207936
15	7663271	7664504	0.000208059
7	57998588	58003333	0.000208189
13	70855849	70858618	0.000208199
15	138358548	138361410	0.000209444
13	158013456	158015014	0.000209614
3	111466851	111472016	0.000210506
11	10053050	10053812	0.000211784
6	160628627	160635976	0.000213169
5	81774856	81778948	0.000214897
13	9433889	9436261	0.000215761
6	6733169	6739654	0.00021976
15	93285488	93287953	0.000220158
3	2876957	2877971	0.000220809
14	62047378	62048831	0.000221155
1	166672582	166676484	0.000221162
8	18794372	18798115	0.000221423
11	10056176	10059054	0.00022325
15	130330154	130333455	0.000225218
6	170293590	170295479	0.000225683
15	2203553	2209749	0.000227049
7	117437815	117440515	0.000229148
6	49148571	49149008	0.000230353
12	27051835	27054735	0.000231096
2	66043151	66047970	0.000232759
13	197432012	197435861	0.000232881
7	89364735	89367319	0.00023476
14	44858531	44861069	0.000234829
9	46519630	46527711	0.000237232
1	748601	749940	0.000237698
18	16713537	16714101	0.000238353
2	72980700	72997302	0.000240145
10	41894700	41896976	0.000240273
2	28409031	28409930	0.000240848
3	70960798	70962178	0.000242957
5	47685561	47692501	0.000243041
2	88253882	88256124	0.000243966
6	47139592	47144284	0.000244753
15	124949936	124952117	0.000247001
4	102660152	102661994	0.000247077
14	46372234	46375820	0.000247328
6	3842566	3845604	0.000247871
2	41218343	41222358	0.00024814
13	112849997	112851726	0.000249148
6	54069909	54073858	0.000249775
5	19207090	19210744	0.000250468
2	46979825	46981575	0.000250604
13	97008811	97016600	0.000254078
2	124199016	124201460	0.000254659
3	37453340	37457518	0.000255491
1	220753780	220757284	0.000272675
6	63913700	63918013	0.00027337
18	39694525	39695834	0.000273949
13	70851087	70855203	0.000274608
12	48232080	48235266	0.000274609
1	1544240	1547135	0.000275144
4	108646434	108649060	0.000275209
1	129781341	129785082	0.000276874
13	145493202	145495558	0.000277068
13	47932668	47935688	0.000277985
5	27361494	27364235	0.000283209
3	4132634	4140460	0.000284827
6	3584516	3589255	0.000285971
1	17366100	17367262	0.000286
3	101811505	101814102	0.000286156
5	60544113	60550934	0.000286228
14	124026062	124028487	0.000288278
1	267633133	267636673	0.000288397
12	40806419	40815921	0.000291824
4	93938868	93951619	0.000292937
18	41802491	41802962	0.000293229
1	73919749	73922749	0.000297409
14	81719398	81728194	0.00030239
13	87750017	87750480	0.000304006
14	15717460	15720233	0.000304185
3	46608730	46610921	0.000305144
14	55297166	55302699	0.000305996
2	98240665	98242249	0.000308871
10	65956216	65959587	0.000310253
14	74244021	74247955	0.000310399
11	64293775	64296268	0.000312017
10	45656217	45656923	0.000313111
7	11451689	11456117	0.000318198
12	46887680	46894224	0.000320948
1	167413931	167415081	0.000322315
6	79889848	79892444	0.000324289
18	16691270	16692624	0.000325188
5	91618283	91622027	0.000325362
2	144323943	144333258	0.000329529
18	9991586	9993306	0.000333685
7	113509604	113512572	0.000334998
4	127156471	127158694	0.000336334
17	52135200	52138587	0.000336796
13	23858797	23866602	0.000338729
7	99146605	99147907	0.000339337
2	4599523	4603145	0.000341669
16	79546070	79551368	0.000343651
13	2511740	2518596	0.000347065
3	70761344	70764890	0.000347195
14	59642567	59644274	0.000347243
7	111726862	111727735	0.000347665
9	114097315	114099322	0.000348477
8	17944936	17946173	0.000348879
1	180988209	180991739	0.000349401
6	49304461	49312912	0.000349712
9	124834554	124836157	0.000350026
15	56192591	56194556	0.000351483
5	5826551	5830522	0.000352941
9	118627243	118628760	0.000354431
15	38724406	38728015	0.000354465
14	72523659	72534105	0.00035514
11	52005587	52009416	0.000356179
15	25220276	25221706	0.000356427
14	101351662	101353869	0.000357214
6	107289659	107290383	0.000357952
10	27719033	27723885	0.000358049
11	22857392	22859614	0.000358645
1	76330109	76334614	0.00035914
5	96786150	96787404	0.000360202
6	3939611	3944571	0.00036267
4	58222737	58223592	0.000363256
9	42101005	42104958	0.000364134
15	119618883	119620727	0.000365849
7	71710425	71711449	0.00036701
9	51990139	51993311	0.000368399
3	37963931	37972706	0.000370998
10	28709950	28713884	0.000371227
6	51637275	51638808	0.000372963
17	62435523	62437228	0.000373459
1	9448070	9453226	0.000373735
17	49479712	49486293	0.000374044
12	11289661	11296777	0.000375481
13	38775035	38780942	0.000375773
7	116731126	116733500	0.000376824
6	79438028	79441745	0.000377092
4	38434039	38436823	0.000377094
2	432523	440263	0.000377251
17	30813868	30819468	0.000378947
8	108723992	108728031	0.000379891
10	43256742	43257915	0.000379903
7	65557035	65559409	0.000382944
16	24704096	24707213	0.000383009
6	159121805	159125293	0.000383206
15	76901667	76902653	0.00038541
1	74963105	74968606	0.000385802
1	9307704	9312983	0.00038616
1	121879716	121882533	0.000386537
14	53608695	53611540	0.000389293
13	140596986	140602587	0.000389887
9	74150638	74154236	0.000393547
16	52618631	52622002	0.000395039
8	32559493	32561669	0.000397028
13	207491198	207492687	0.000400049
2	45058797	45059674	0.000400362
6	72451478	72455149	0.000401071
15	75282821	75285113	0.0004016
11	14963868	14966996	0.000402547
10	41853107	41856018	0.000403232
15	92120693	92122244	0.000406295
9	2077634	2083668	0.000406617
2	144041960	144042863	0.000407433
6	158454873	158456497	0.00040925
6	6829662	6837387	0.000413135
10	56564471	56566744	0.000415876
15	139551035	139553870	0.000416156
6	1348572	1351064	0.000417484
2	136538004	136538690	0.00041837
5	90057	94840	0.000420231
7	13978848	13981393	0.000422498
1	79727990	79734194	0.000423604
13	133469646	133473084	0.000426001
15	80727600	80730391	0.00042727
5	32318672	32320000	0.000427506
15	138270229	138270918	0.00042793
7	111990481	111992590	0.000429537
6	73225327	73228154	0.000429847
15	93755400	93759531	0.000430201
9	53099171	53101514	0.000431366
3	111293875	111299217	0.000431402
1	261804191	261806783	0.000431877
3	39847458	39852953	0.000436024
12	58170889	58173249	0.000436621
10	28507071	28511989	0.00043697
13	145235222	145239133	0.000437712
13	21706255	21709458	0.000438329
13	132540563	132543737	0.000441354
12	10389455	10391506	0.00044494
15	93953542	93956816	0.000446761
1	159098979	159101586	0.000446869
17	20395064	20396633	0.00044835
12	45832728	45837950	0.000449987
5	19263292	19267444	0.000450392
13	147191621	147195515	0.000452312
6	156769196	156769840	0.000453917
13	10853017	10854951	0.000455096
14	129213421	129222484	0.000458571
1	190355824	190362474	0.000459737
14	35838013	35842796	0.000460951
8	70151108	70154684	0.000462909
12	3232074	3238835	0.00046404
13	33088076	33092932	0.000465008
12	48301263	48308019	0.00046545
1	194848406	194849278	0.000465809
2	117652079	117653819	0.000468296
7	55382635	55387929	0.000468705
13	23826118	23829353	0.000470554
2	147157443	147159893	0.000471399
7	41580369	41581109	0.000472949
5	4960422	4961865	0.000475822
1	238814350	238816572	0.00047757
1	135889059	135889853	0.000480813
15	119518539	119521099	0.000481389
2	69895265	69899425	0.000481636
9	103062310	103064954	0.000481724
8	39795143	39796545	0.000482875
9	74081127	74083933	0.000484104
12	3252736	3258377	0.000484157
1	110790127	110793199	0.000484826
2	144341077	144346629	0.00048493
12	758738	767260	0.000486325
14	1442323	1444611	0.000486501
1	76297648	76300403	0.000487448
10	54672945	54677955	0.000488167
7	49350194	49352553	0.000490807
15	130370529	130373215	0.000492044
15	70006489	70008619	0.000492508
12	46872716	46881174	0.000497611
3	27469895	27473421	0.000498566
6	157084436	157086645	0.000502068
17	34355263	34358119	0.000511977
9	20495589	20498913	0.000514344
1	77980106	77987359	0.000516789
16	24662890	24665860	0.000517163
18	29930290	29936589	0.000518679
1	190415938	190417848	0.000519555
15	93452015	93455588	0.000520506
4	39013938	39015898	0.000521321
13	153190059	153192291	0.000526282
15	48193225	48193937	0.000527369
2	62328764	62331877	0.000528078
3	17937842	17938829	0.000529122
5	52736858	52739315	0.000530243
9	28023514	28028798	0.000531716
1	159132953	159134471	0.000531884
13	177966407	177967533	0.000536449
2	39989912	39992563	0.000539255
1	271287161	271288355	0.000539334
1	650220	651120	0.000545743
18	42099849	42105362	0.00054913
3	111472302	111479142	0.000549688
5	67118477	67119670	0.000550609
1	32506478	32508809	0.000550908
3	110622921	110628373	0.000551681
7	35159404	35163598	0.00055398
2	16605575	16622617	0.000555243
5	11330137	11333483	0.000556088
15	136540780	136544141	0.000558727
1	273790092	273796241	0.00056066
13	202712471	202716422	0.000564419
2	79277656	79281410	0.000565476
3	16589434	16593887	0.0005693
1	139517523	139521658	0.000570207
12	60388709	60398543	0.000570286
7	92333079	92337787	0.000571561
18	10074721	10078478	0.000571645
1	77596826	77602726	0.000572881
7	19839603	19841393	0.000572985
14	89785708	89790263	0.000574188
16	33140010	33141423	0.000577417
4	101914441	101915806	0.00058213
2	15025619	15030402	0.000582185
16	74305677	74307158	0.000582391
8	10695760	10697934	0.000582797
6	69834816	69839199	0.000583058
15	106813971	106815502	0.000586076
9	13816943	13821005	0.000586559
2	25193132	25194468	0.00058795
9	134968132	134979133	0.000588657
11	19117296	19122600	0.000589146
13	131385161	131385863	0.000593613
5	96790886	96791456	0.000596204
14	107024233	107026768	0.000598647
1	2544850	2548237	0.000598968
1	34135629	34137547	0.000604686
5	420628	422986	0.000605694
6	15910956	15913549	0.000605864
15	105791037	105792575	0.000606535
1	58346326	58347868	0.000609163
2	227605	232737	0.000609716
2	2057127	2063188	0.000609892
6	29959405	29963351	0.000612899
1	223360392	223361296	0.000615665
4	3054841	3062579	0.000617131
12	18178405	18180159	0.000617425
10	45657302	45658262	0.000622678
9	57257272	57259945	0.000623114
3	111479379	111492198	0.000623417
7	11521197	11524614	0.000623682
15	110536891	110540544	0.000625865
18	41786749	41787931	0.000626831
7	88019713	88033211	0.000631052
12	215559	225104	0.000631889
13	98137262	98138674	0.000632434
14	11348699	11350586	0.000633112
13	88934683	88937066	0.000637213
11	52366300	52369086	0.000637838
1	198266	200952	0.000640939
3	88432234	88435074	0.000641766
1	75010305	75015667	0.000642154
5	24708748	24717876	0.000642983
4	96113405	96115642	0.000644968
11	78936599	78939619	0.000646331
1	160023718	160025353	0.000650315
7	99055264	99057554	0.000651314
4	92974088	92975855	0.000654293
9	47314635	47320082	0.00065661
1	507895	510570	0.000657102
11	10706986	10708645	0.000658112
3	101818337	101822524	0.000661387
17	5278189	5279979	0.00066159
10	41310768	41313959	0.000666992
14	106786892	106789561	0.000669668
16	41292946	41296879	0.000669748
12	45428155	45430745	0.00067122
4	127115963	127120090	0.000671645
7	27167436	27169890	0.000672488
5	27332219	27335762	0.000681169
6	63629354	63638466	0.000681825
8	40448106	40450839	0.000682781
15	138335809	138338397	0.000685309
13	122472972	122475867	0.000685924
7	87249460	87251933	0.000687646
3	97525790	97537493	0.000689637
7	26820653	26821481	0.000691922
1	223443386	223444383	0.000693034
1	267548870	267554905	0.000695615
7	38696935	38699894	0.000695971
14	120904844	120908238	0.000703379
17	61931937	61937699	0.000705347
2	131914218	131914891	0.000706924
9	139474930	139478555	0.000707435
1	118897934	118898950	0.000709823
11	78336090	78339949	0.000713127
6	32631258	32631678	0.000717351
9	27595567	27597464	0.0007174
16	51749592	51756543	0.000718937
14	1483406	1485104	0.000719073
4	16272584	16273649	0.000724888
17	26051751	26053551	0.000726995
13	157185001	157189231	0.00072869
3	111406604	111408565	0.000730901
1	1807692	1810831	0.000732186
16	48470456	48473799	0.000740966
1	109611163	109613883	0.000742458
6	59463407	59464944	0.000743062
1	168011726	168016449	0.000744516
6	50537556	50538907	0.000748586
5	92844354	92844931	0.000754593
13	136710671	136714477	0.000756362
3	106548514	106550237	0.000760129
6	76125557	76131317	0.000761352
2	59280507	59287593	0.000762407
16	46431814	46438951	0.000762577
6	151218116	151227447	0.000762625
13	181297741	181301314	0.000763658
13	132753703	132757836	0.00076694
11	14302874	14307931	0.000773096
2	66049115	66052073	0.000774037
11	76977237	76980183	0.000780261
3	119570912	119571943	0.000788411
6	79917046	79921585	0.000791182
5	6134474	6135544	0.000791198
6	30507921	30509888	0.000793837
5	2780720	2782371	0.000794963
17	51534708	51539924	0.000801343
17	35492958	35495285	0.000802394
12	10959229	10963111	0.000803969
15	137132384	137136616	0.000804342
7	120270078	120272113	0.000806055
4	68161772	68162703	0.000808346
6	52275528	52279011	0.000809236
5	15228564	15231689	0.000813723
7	14100450	14102220	0.000818781
14	15059782	15066538	0.000819702
13	66746403	66748348	0.000820469
2	74280021	74287572	0.000820579
11	13083414	13085007	0.000821292
1	273245663	273247152	0.000821711
13	135577768	135583716	0.000824142
17	35238345	35239690	0.000829392
14	89289357	89293235	0.000829516
12	11462654	11464551	0.000829785
1	181031530	181033879	0.000832844
3	40668594	40671582	0.000833938
6	27826292	27827490	0.000835202
9	47354672	47362170	0.000836706
6	55225817	55226888	0.000838498
5	27302569	27304622	0.000840695
7	56377609	56382338	0.000843449
17	48558235	48563798	0.000844043
4	27921572	27923523	0.000845339
7	11910399	11913911	0.000846731
3	86114230	86121657	0.000848116
14	121290088	121296236	0.000849599
1	179734826	179739045	0.000850556
3	4167993	4174449	0.000851947
5	27367112	27369510	0.000852448
1	17572337	17576128	0.000857301
4	109325567	109330442	0.000861053
14	138917498	138928204	0.000861179
16	24687192	24688627	0.000862752
7	16688210	16689758	0.000863977
8	87515354	87519403	0.000869142
2	1901722	1903632	0.000869249
8	47042518	47045637	0.000870482
15	67201972	67203560	0.000871953
1	138279440	138287698	0.000872506
1	28112065	28116982	0.000872636
15	61140524	61142141	0.000877609
3	2073528	2075512	0.000878706
15	7798805	7800206	0.000878953
3	75618643	75623159	0.00087937
13	54257179	54258406	0.00088005
13	69086704	69089405	0.000884345
1	268231608	268233226	0.000892224
8	72788206	72792172	0.000893956
3	49408993	49412317	0.000894841
2	18372258	18374911	0.000899262
15	80006920	80010837	0.000899305
7	31528789	31529908	0.000902654
1	271529641	271533166	0.000902846
17	32022318	32027475	0.000904939
13	17470849	17472622	0.000909608
11	8243864	8244998	0.000910277
15	81962686	81964948	0.000911305
9	139217536	139219758	0.000913029
14	51461630	51466896	0.000916631
4	16315587	16319921	0.000917718
16	71346232	71352457	0.00091847
15	135568577	135570981	0.00091972
11	785707	786956	0.000920826
5	32316914	32318356	0.000921797
10	43258155	43259949	0.000922046
18	14337869	14341951	0.00092214
15	7012473	7014511	0.000923822
12	23782181	23785624	0.000926744
9	10529310	10531533	0.00092955
6	169597249	169600386	0.000930609
13	38781201	38788931	0.000932352
12	24878716	24880242	0.000935604
13	140664722	140668431	0.000935934
6	99898822	99901209	0.000937695
9	137652769	137653917	0.000938074
17	35218621	35220954	0.000940359
2	115914186	115915588	0.000946995
12	18315721	18317544	0.000949429
14	114754060	114764202	0.00095033
16	32804139	32809198	0.000951872
17	1557292	1562347	0.000952422
5	19239830	19245396	0.000953289
12	19176947	19178422	0.000954136
12	48269223	48281298	0.000955006
15	118984511	118986507	0.000955137
1	74715529	74718728	0.000963797
15	136935556	136940307	0.000967073
5	18827895	18830164	0.000967906
3	27279924	27280634	0.000970239
11	15048057	15056930	0.000970918
4	944981	947042	0.000974512
16	46774742	46775744	0.00097517
18	14322716	14325311	0.000978601
13	11395871	11398252	0.000978924
12	20439038	20440522	0.000980792
1	158742339	158743362	0.000986512
6	150799606	150801513	0.000991177
12	48161554	48165139	0.000991394
5	23179458	23186730	0.000992149
15	67542182	67547691	0.000992569
5	46480761	46483177	0.000994032
13	81990103	81991195	0.000994711
3	125016098	125021696	0.000995996
4	38490523	38492663	0.000996257
12	24834917	24837543	0.000997241
13	197924737	197926205	0.000997767
6	147278775	147281148	0.00100564
1	206067975	206069579	0.00101222
6	49095706	49098347	0.00101244
3	113441443	113442670	0.00101245
6	47168715	47170610	0.00101892
1	273782157	273786694	0.00102212
12	60256992	60259102	0.00102534
3	94375244	94379592	0.0010269
2	1270782	1289225	0.00102872
12	18173255	18175756	0.00102926
11	4373577	4375862	0.00103211
1	34357838	34360279	0.00103216
6	97316532	97319206	0.00103263
14	59651456	59653466	0.00103412
6	39768146	39774678	0.00103475
9	9329169	9330050	0.00103821
3	27360296	27363202	0.00104005
14	47878268	47885910	0.00104013
18	55958632	55960432	0.00104234
4	107977929	107984168	0.00104489
1	121865643	121870791	0.00104919
10	32208944	32212550	0.00105056
9	107703314	107707535	0.00105069
17	34780196	34783932	0.00105078
6	3848620	3858213	0.00105331
14	113136934	113138694	0.00105423
6	79935854	79943265	0.00105891
13	132531656	132536854	0.00105912
16	24403594	24405995	0.00106729
1	183778672	183780512	0.00106885
2	60336707	60343848	0.00107193
5	24113259	24117964	0.00107228
3	17499400	17503067	0.00107425
13	180857774	180859168	0.0010748
17	34340461	34342617	0.00107619
4	59572989	59575788	0.00107687
7	21281066	21281438	0.00107728
14	29805343	29807893	0.00107766
2	49891792	49903106	0.00108021
2	142038508	142044407	0.00108074
5	3931870	3933456	0.00108107
14	74631207	74636710	0.00108524
2	144399157	144405196	0.0010875
3	119565826	119566776	0.00109023
7	83847671	83848654	0.0010978
9	17142351	17144731	0.00109812
15	93898361	93901063	0.00110161
11	16262686	16266830	0.00110382
1	190168420	190172212	0.00110482
1	162338605	162339960	0.00110544
10	66467056	66480114	0.00110673
3	31558092	31566813	0.00110762
7	92321105	92332502	0.00111267
1	181034191	181036486	0.00111699
1	28045930	28048811	0.00111832
1	17346382	17348839	0.00111976
1	274045564	274046717	0.00112144
3	86586958	86592543	0.00112326
1	270636155	270637845	0.00112367
7	55378209	55381857	0.00112422
2	150565596	150567697	0.00112426
14	129197826	129208299	0.00112459
16	51785340	51789809	0.0011249
6	68995693	69003253	0.00112544
6	13608324	13611262	0.00113032
1	40471886	40473526	0.00113754
14	107053055	107060260	0.00113967
1	108733328	108733859	0.00113967
6	63919798	63922677	0.00114147
13	55869465	55870074	0.00114169
14	106761537	106764959	0.00114423
9	131157119	131160619	0.00114525
17	33595658	33598522	0.00114528
9	74123982	74125440	0.00114852
12	58701946	58709497	0.00114983
5	62217544	62220622	0.00115084
10	66462896	66466836	0.00115097
15	93483306	93486098	0.0011526
15	60163453	60167580	0.00115472
14	29527983	29530438	0.0011566
14	7486378	7488293	0.00116052
12	58863311	58869557	0.00116341
6	7061558	7063320	0.00116635
4	89233972	89235406	0.00116954
3	32024396	32026094	0.00117066
14	31048730	31050941	0.00117274
6	59630037	59634628	0.00117277
7	29065534	29070694	0.00117399
15	118728752	118729936	0.00117479
17	44319335	44320246	0.00117866
13	119987920	119988586	0.00118065
9	17188467	17189217	0.00118172
5	93261946	93263252	0.00118315
9	114742024	114745703	0.00118653
11	7140288	7145876	0.00118757
17	47111446	47116197	0.001192
17	38394064	38398929	0.0011947
17	35264247	35268249	0.00119654
10	66387144	66390940	0.00119973
15	60053579	60055938	0.00120338
18	42015666	42018772	0.00120503
6	58272512	58273540	0.00120716
15	6192209	6193846	0.00120741
8	33372788	33374514	0.00121152
1	273932779	273939996	0.00121205
1	84100224	84103469	0.001215
17	5191531	5192939	0.00121673
8	70137960	70149807	0.00121755
5	14357973	14364527	0.00121776
4	36641490	36644624	0.00122071
15	76763177	76763488	0.00122249
13	34953235	34960209	0.0012238
3	111065950	111072805	0.00122611
3	42241554	42245143	0.0012267
3	4929715	4936061	0.00122931
5	3919275	3923464	0.00123048
7	88200914	88203992	0.00123164
1	15180721	15188658	0.00123235
6	72079930	72080833	0.00123458
5	8925282	8930144	0.00123536
6	49946669	49948517	0.00123633
2	143155796	143159798	0.00123993
9	139342060	139344297	0.00124065
3	79715052	79717728	0.00124942
5	91556534	91558557	0.00125009
13	75491396	75496784	0.00125022
2	144213966	144216629	0.00125106
9	126635575	126636541	0.00125159
9	67003552	67005632	0.00125324
6	67340430	67343591	0.00125554
5	91683892	91688007	0.00125579
7	40279891	40281963	0.00125712
14	140776898	140779711	0.00125929
11	67895523	67900711	0.00126471
17	62722203	62730006	0.00127016
17	47655908	47666340	0.00127123
3	113666900	113668612	0.0012717
4	117261169	117262680	0.00127281
9	3448052	3456004	0.00128087
3	117661401	117666258	0.00128158
7	31478588	31480538	0.00128221
7	46711328	46712897	0.00128339
3	119519275	119521257	0.00128357
4	101073532	101076325	0.00128593
2	33330137	33331385	0.00128604
15	110533215	110536663	0.00128855
6	84743423	84749271	0.00128876
9	124391314	124392584	0.00128911
7	64555994	64570649	0.00129017
3	1706817	1710174	0.00129667
6	12392114	12396698	0.00130022
1	112470090	112473154	0.00130076
6	164277801	164279652	0.00130326
5	88508551	88510587	0.00130395
14	42215616	42219240	0.00131035
8	55090010	55090429	0.00131186
1	181074718	181077762	0.0013148
17	51386585	51395258	0.00131703
7	116753189	116758497	0.00132036
6	76133397	76136182	0.00132206
14	6226831	6229578	0.00132334
14	11013465	11016552	0.0013249
3	71098924	71101349	0.00133435
13	207103043	207108815	0.00134974
17	35232558	35234897	0.00135431
6	37443181	37444514	0.00135662
1	267467768	267468841	0.00135767
9	64938168	64942983	0.0013617
10	42944456	42948334	0.00136323
12	45852108	45855675	0.00136354
13	47966761	47968274	0.00136515
11	14971544	14976600	0.00136767
15	30437194	30439072	0.00137021
5	22945175	22946496	0.00137378
13	55940608	55944004	0.00137813
12	11497334	11499992	0.00138764
13	11101604	11104925	0.00138884
13	68293481	68295943	0.00139057
16	48271726	48275122	0.00139148
2	77601715	77605809	0.0013928
5	14338250	14352557	0.00139286
2	61476149	61477423	0.00140158
16	46394719	46396732	0.0014023
13	70185448	70187423	0.00140315
8	82969887	82972158	0.00140548
9	88288377	88292123	0.00140797
6	135011045	135012018	0.00140965
1	76335939	76337493	0.00140996
1	243189060	243190584	0.00141327
2	61338481	61352423	0.00141465
5	11905354	11906926	0.00142887
14	114537990	114539341	0.00143113
6	62739213	62740851	0.00143251
16	45043501	45046995	0.00143339
12	60700136	60701447	0.00143504
13	145360085	145368102	0.00143662
1	223445781	223448884	0.0014381
13	140603804	140606307	0.00143935
12	45409848	45412358	0.00143984
13	124310560	124310916	0.00144007
2	3807976	3816486	0.00144707
15	129863967	129866968	0.00145077
7	34839320	34842022	0.00145086
14	137660718	137664530	0.00145345
7	2562973	2565063	0.00145703
1	108662341	108663756	0.00145891
8	30599715	30602070	0.0014628
14	7171851	7173570	0.00146335
14	129196472	129197579	0.00146355
15	94130206	94132561	0.00146399
X	41759203	41760731	0.00146745
13	43720193	43721570	0.00147751
1	83269748	83270650	0.00147868
9	27007183	27008140	0.00148124
15	93556933	93564811	0.00148183
11	15682004	15683163	0.00148503
3	27430456	27432690	0.00148524
3	16362938	16366983	0.00148615
5	34863086	34865744	0.00148839
17	34768747	34772121	0.00148843
1	149945889	149946536	0.0014999
18	54358650	54359883	0.00150204
9	123922972	123926886	0.00150559
3	46900239	46902994	0.0015141
2	65978972	65983621	0.00151623
13	152001808	152005462	0.00152241
9	48666115	48669289	0.00152243
12	46782178	46784098	0.00152252
5	41793140	41795582	0.00152271
1	77960912	77965190	0.00152774
16	60267977	60274889	0.00152919
6	150688853	150692083	0.0015393
9	57361837	57366137	0.00154476
7	49345159	49347745	0.00154977
16	45668866	45672121	0.00155011
9	124820641	124828203	0.00155045
13	3512036	3519971	0.00155213
2	144240724	144242378	0.00156188
10	16429622	16432609	0.00156193
1	10083548	10084969	0.00156967
10	41317740	41320554	0.00157281
4	118468248	118471501	0.00157668
14	138930328	138935934	0.00157989
14	6881017	6884634	0.00158056
10	23895284	23898003	0.00158225
4	1342905	1345689	0.00158843
7	112874923	112876171	0.00159234
7	1404192	1406279	0.0015953
3	52471453	52472177	0.00159871
6	43576132	43578365	0.00160309
1	273991025	273994922	0.00160393
4	40028940	40030323	0.00160421
13	180808504	180814322	0.00160529
13	8567183	8569783	0.00160687
13	139873367	139875892	0.00160907
15	136893242	136897983	0.00160982
7	34935328	34936561	0.00161
15	138187741	138188385	0.00161046
6	51817594	51823790	0.00161217
13	4226211	4232441	0.00161466
4	111901152	111905249	0.00161618
16	24803953	24807635	0.00162088
13	148001564	148003224	0.00162166
4	126972223	126980831	0.00162366
13	130903652	130905182	0.00162745
7	57651335	57652448	0.0016336
3	119327729	119329540	0.0016353
6	66930667	66931952	0.00163668
12	1959848	1960742	0.00163815
16	32125540	32127775	0.00163937
14	53565909	53568034	0.00164335
8	135634216	135635370	0.0016515
3	27483482	27488014	0.00165233
8	10693825	10695515	0.0016532
3	57316387	57318293	0.0016545
5	69175423	69177064	0.00165657
15	131138517	131139511	0.00165823
1	274065611	274067551	0.00165922
5	64445218	64448561	0.00166177
6	84786767	84793609	0.00166599
1	158479359	158487348	0.00166685
5	62220992	62222718	0.00166779
7	91943865	91948746	0.00166968
14	132074131	132076208	0.00167534
9	10453106	10456732	0.00167628
3	37957666	37961341	0.00167664
9	49107006	49112233	0.00167772
13	21799671	21800546	0.00168867
2	5485420	5487725	0.00169096
14	133665410	133667406	0.00169225
7	117358343	117360079	0.00169348
6	47102322	47104703	0.00169451
9	71329770	71331856	0.00169955
12	23129302	23130762	0.0017004
9	7491363	7493386	0.00170344
18	44711371	44713033	0.00170632
7	53852520	53858248	0.00170938
11	17730405	17733694	0.00171039
7	21434331	21435614	0.00171409
X	44382646	44384437	0.00172129
9	123579264	123586313	0.00172365
9	52075840	52088285	0.00172642
15	92086512	92089482	0.00172819
18	48439754	48441568	0.00172921
1	267585448	267589543	0.00173357
14	6373092	6379120	0.00174048
7	117354813	117357837	0.00174844
10	66716240	66716930	0.00174907
13	132546969	132549189	0.00174976
9	58346253	58347857	0.00175406
3	42308618	42315050	0.00175443
3	108930008	108931073	0.00176205
12	7662127	7664909	0.00176926
4	36524078	36525958	0.00177277
15	109166626	109167620	0.0017736
16	27544369	27549686	0.00177408
6	98898913	98902156	0.00177832
1	167431195	167435063	0.00177922
17	41191180	41194556	0.0017794
7	112241159	112242633	0.00178021
5	56279506	56285591	0.00179019
14	29817178	29818889	0.00179114
16	26066707	26068115	0.00179797
8	10595397	10595796	0.00180228
13	146172066	146175048	0.0018025
8	40313132	40318344	0.00180638
7	98687580	98691423	0.00180656
16	47189889	47191691	0.00180801
12	14664654	14668807	0.00180895
2	147289030	147292794	0.00181262
14	137629540	137630585	0.00181303
12	48214130	48216994	0.00181599
18	42166139	42168047	0.00181716
2	136322985	136324513	0.00182007
6	1208654	1210198	0.00182007
15	93411489	93416109	0.00182399
1	75414885	75420466	0.00182509
3	46864061	46873074	0.00182636
12	1194159	1200516	0.00182917
13	29523568	29524594	0.00182981
15	60215690	60218464	0.00182982
3	77317270	77320082	0.00183171
13	68216143	68224356	0.00183189
1	273237206	273239613	0.0018369
4	96090429	96100316	0.00183983
13	199455275	199457531	0.00184184
5	60241954	60244042	0.00184371
4	8351919	8354334	0.0018486
2	151213134	151215025	0.00184886
10	16150266	16154107	0.00185008
2	71023258	71025593	0.00185069
6	47537129	47542002	0.00185288
8	67872390	67874596	0.00185406
3	29173643	29177005	0.00185546
1	135131075	135132677	0.00185655
1	108732242	108732991	0.00185675
7	74949130	74959571	0.00185825
2	119915954	119917598	0.00185827
5	18317093	18333992	0.00185966
13	69721458	69725092	0.00186162
5	19258061	19260968	0.00186239
7	120765960	120767001	0.00187616
4	59581515	59583690	0.00187647
4	72769670	72770610	0.00187711
9	130925269	130926875	0.00188203
8	40400884	40402494	0.00188227
15	67786990	67791220	0.0018842
7	116723790	116726040	0.00188498
3	39840894	39842729	0.00188653
1	15410600	15412012	0.00188905
6	62047113	62048367	0.00189384
9	106997934	107001217	0.00189759
1	190422726	190425512	0.00190745
6	2435416	2436439	0.00191171
15	136544447	136547188	0.0019131
14	49132030	49133070	0.0019145
5	11280519	11282226	0.00191638
10	16140551	16141381	0.00192473
15	130385272	130387897	0.00192899
1	273853196	273855193	0.00193042
14	24167145	24168759	0.00193177
17	62860774	62861963	0.00193715
13	34382995	34387767	0.00193753
5	3373279	3374946	0.00193812
4	127008188	127011902	0.00193967
10	39169695	39171465	0.00193978
6	153285883	153286472	0.00194126
16	64668322	64674227	0.00195556
7	118473738	118475094	0.00195752
11	7543679	7549800	0.00195843
5	62224246	62226591	0.00195992
12	25904158	25907085	0.00196547
7	11962568	11963759	0.0019689
18	38981474	38985064	0.00197596
9	20046183	20051838	0.00197692
14	28480865	28485260	0.00198606
14	4204618	4209291	0.00198764
7	40356554	40359700	0.00198877
17	35268694	35272204	0.00199046
17	61946878	61948864	0.00199076
7	95504911	95505773	0.00199156
17	51398488	51404124	0.00199424
1	29574377	29578187	0.00199876
9	10444131	10445940	0.00200389
3	93654156	93657218	0.00200496
3	111028501	111029829	0.00200594
7	20742140	20745553	0.00200639
12	22247628	22256227	0.00200859
1	15615490	15616628	0.00201078
14	32117497	32121550	0.00201189
1	9035824	9037281	0.00201764
11	22056634	22058614	0.00201814
7	29803309	29806791	0.00202188
1	143652345	143652822	0.00202532
14	67152528	67162605	0.00202638
5	32077664	32078852	0.00203018
7	112428511	112429724	0.00203487
12	25088308	25093007	0.00203494
17	58566076	58567819	0.00203662
9	9774666	9786797	0.00203892
4	12291469	12298927	0.00204144
6	3777597	3778889	0.00204333
1	158498031	158504613	0.00204513
2	84623733	84624603	0.00204571
4	41435455	41437915	0.0020476
5	24550627	24551464	0.00204888
12	16095259	16097851	0.00205126
18	37899915	37906075	0.00205135
1	76534760	76535314	0.00206012
17	62862295	62879508	0.00206237
1	184478245	184480557	0.00206291
2	69571591	69574242	0.00206462
12	45842836	45844469	0.00206859
5	14306041	14307949	0.00207138
1	259236412	259237073	0.00207492
14	65563288	65569323	0.00207653
9	126522281	126525965	0.00208228
4	130590245	130591545	0.00208235
2	72949902	72951699	0.00208306
13	181058320	181059617	0.00208407
7	55364557	55370035	0.00208865
14	89278437	89287019	0.00209118
7	56382602	56390541	0.00209304
10	66207278	66212919	0.0020951
12	4976424	4981630	0.00209582
7	98153105	98155681	0.00209607
10	8304694	8309253	0.00209756
4	105475986	105477417	0.00209988
2	85379917	85382706	0.00210076
1	261722966	261724988	0.00210799
16	71549972	71552496	0.00210955
12	20871153	20872211	0.00211017
14	74248213	74250395	0.00211027
13	122266935	122269330	0.00211719
5	7009201	7011249	0.00211818
9	132764069	132764726	0.00211982
4	129598209	129601570	0.00212072
11	20944480	20952639	0.00212121
7	65135265	65139915	0.00212267
2	8172216	8176585	0.00212408
12	11610580	11612270	0.00212546
3	75044153	75045115	0.00212862
3	127199477	127199862	0.00213595
6	64469504	64470480	0.00213857
1	130306830	130310379	0.00213863
14	1447782	1449142	0.00213982
8	28340689	28341697	0.00213983
13	126647291	126649863	0.00214396
4	16479501	16483674	0.00215005
7	92362496	92368154	0.00215029
1	112425785	112435242	0.00215849
13	207643909	207645739	0.00216025
4	14486916	14491302	0.00216074
3	72883713	72888805	0.00216564
13	196875436	196882201	0.00216769
12	19295554	19297023	0.00217957
16	46277384	46278851	0.00218109
13	196065222	196069569	0.00218333
3	86059941	86065810	0.00218357
16	51343167	51359510	0.002186
6	51962402	51966098	0.00219066
6	47456553	47456972	0.00219079
1	2001301	2008352	0.00219138
18	5695775	5698657	0.00219389
13	181347760	181349286	0.00219424
13	121925858	121928023	0.00219448
6	30075524	30078616	0.00219458
4	106563401	106570368	0.0021975
14	38800006	38801340	0.00220014
6	55339911	55341814	0.00220572
7	46345622	46349035	0.00220735
15	130393898	130395961	0.00221228
6	62832366	62834519	0.00221403
15	93893068	93897781	0.00222702
12	4822498	4830876	0.00223769
11	52352250	52354428	0.00223911
6	6562294	6564253	0.00223996
2	89528615	89530283	0.00224618
6	9744467	9747660	0.00224798
9	124838252	124839640	0.00225312
4	68163740	68165292	0.00225674
15	45608782	45610995	0.0022573
6	97312297	97313659	0.00226427
1	267576461	267577797	0.00226456
12	60788567	60790534	0.00226709
1	180093628	180097274	0.00226807
10	56532809	56538404	0.00226823
7	32307348	32310909	0.00226829
7	49961518	49962949	0.00226886
13	8145142	8146004	0.00226938
13	45785273	45789571	0.00227907
3	71202810	71206389	0.00227987
1	261653888	261656172	0.00228267
2	4123873	4127928	0.00228339
15	59693538	59698557	0.0022851
15	60127630	60130385	0.00228523
11	25302127	25304790	0.00228788
1	37067701	37070645	0.00228809
4	35834956	35836576	0.00228856
12	11612605	11615702	0.00229263
7	56374541	56377035	0.00229496
2	49153003	49155203	0.00229639
7	7845015	7847279	0.00230047
16	46100701	46104798	0.00230325
9	13865818	13867209	0.00230435
2	143266825	143271881	0.00231186
7	24177557	24180261	0.00231387
13	124982742	124983335	0.0023156
2	9573269	9577783	0.00231738
2	85514265	85516849	0.00231769
7	34834431	34835875	0.00232019
9	139169172	139170970	0.002324
7	57658810	57660514	0.00233246
13	145254011	145254813	0.00233907
1	85885035	85885940	0.00234042
12	7651800	7655797	0.00234196
1	15188822	15192129	0.0023461
3	55767099	55770571	0.00234797
11	5701079	5702376	0.00235178
14	31913353	31914599	0.00235293
4	45825332	45827132	0.00236204
18	37850092	37854975	0.00236667
15	138291044	138292820	0.00236694
2	74599281	74602857	0.00236732
6	69080210	69082712	0.00236768
16	21282916	21286002	0.00236978
14	3001788	3002342	0.00237157
15	1887797	1889062	0.0023757
3	29125735	29135214	0.00237626
6	51160851	51164109	0.00237729
1	188580845	188583265	0.00237857
2	79336304	79338121	0.00238972
18	14308312	14310579	0.00238976
7	64498205	64502923	0.00239194
15	30780178	30783001	0.002394
5	7098616	7103277	0.00239852
11	14793780	14795377	0.00239902
3	71235325	71239264	0.00240574
9	105542275	105546290	0.00240825
15	136913831	136920805	0.0024151
12	11473196	11475855	0.00242246
14	62043957	62046771	0.00242569
1	267727164	267728519	0.00243093
9	115137835	115143143	0.00243168
6	39801196	39805687	0.00244299
15	44912607	44914513	0.00244512
6	51824056	51831115	0.00244624
9	139189547	139191794	0.00244869
6	84759013	84776314	0.00245126
6	68655389	68656202	0.00245293
3	94280776	94281885	0.00245493
1	251024864	251029919	0.00245578
14	62035056	62036927	0.00245756
11	22157998	22160237	0.00245806
5	32092991	32095530	0.00245925
6	86137612	86140577	0.00245958
4	14442765	14443916	0.00246179
7	10076691	10077790	0.00246985
14	112941795	112944556	0.00247619
17	39334121	39335250	0.00247653
16	24826706	24828600	0.00247774
17	62634244	62637627	0.00248058
17	52128727	52132357	0.00248318
12	23772809	23776259	0.00248382
1	78217028	78225878	0.00248593
1	74625747	74631429	0.0024863
15	120809866	120811271	0.0024911
12	20424939	20427524	0.00249174
1	32670081	32672901	0.00249956
4	65670210	65671218	0.00250101
5	15152098	15154365	0.00250284
3	94451836	94460557	0.00250596
14	114401461	114406092	0.00250747
3	38302466	38304830	0.00250781
10	23849294	23855067	0.00250788
12	48178924	48203641	0.00251067
13	3623974	3625585	0.00251156
18	5424011	5427100	0.0025127
1	261333704	261343314	0.00251321
8	130840794	130842007	0.00251363
2	46875633	46878389	0.00251445
2	150600885	150608850	0.00251471
11	9875479	9877296	0.00251666
6	88138536	88140743	0.00251711
6	164929184	164932989	0.00252229
1	265587231	265592593	0.00252773
15	119598402	119598968	0.00253138
6	157148065	157150165	0.00253547
1	209059151	209060393	0.00253632
7	111944065	111944880	0.00253767
9	20726967	20733403	0.00254211
13	207582701	207590598	0.00254836
13	73081788	73086058	0.00254892
2	3139942	3140742	0.0025617
14	89758578	89761113	0.00256199
12	26452649	26456012	0.00256333
10	42016113	42017877	0.00256634
18	39309145	39310261	0.00257403
6	155969058	155971488	0.00257415
5	3925580	3927694	0.00257816
16	27563963	27573679	0.00257941
6	69846683	69850551	0.00258572
1	29128140	29130998	0.00259031
5	2777938	2780107	0.00259135
12	23127085	23129089	0.00259171
3	53489479	53492290	0.00260201
2	108063357	108065893	0.00260565
16	41350168	41354224	0.00260737
4	111921782	111927758	0.00261036
1	86953981	86956156	0.00261172
17	33908825	33913350	0.00261196
6	70198476	70200294	0.00261275
1	139582002	139583049	0.0026132
6	101648896	101650945	0.00261665
7	99254578	99257418	0.00262384
8	99308503	99312044	0.00263119
1	99229462	99231615	0.00263251
2	33458967	33460278	0.00263885
1	223346702	223350348	0.00264543
6	155964740	155968458	0.00264551
5	59527862	59529404	0.00264707
6	110598964	110601181	0.00264873
7	59125118	59128423	0.00265545
15	93479393	93481004	0.00265653
9	66050686	66054661	0.00265855
6	73038071	73038944	0.00266481
6	84704782	84708699	0.00266549
17	8447835	8450778	0.00266672
1	158735900	158738503	0.00267136
17	52957266	52958720	0.00267202
14	114572693	114576834	0.00267276
7	39037641	39038403	0.00267736
13	68282118	68289526	0.00268299
1	147808689	147811318	0.00268674
13	208286473	208294372	0.00268886
14	74637313	74639029	0.00268951
4	701004	702598	0.00269041
7	26781224	26782758	0.00269056
1	179726031	179730694	0.00269456
3	44045371	44046307	0.00269521
7	805997	807059	0.00270282
13	157191535	157196116	0.00270478
13	82643301	82644514	0.00270842
14	75135236	75140664	0.00271206
10	39007648	39008821	0.00271304
13	21701247	21702906	0.00271476
2	143465723	143469093	0.00271847
1	6735892	6736742	0.00271944
1	475159	476485	0.0027211
12	18158928	18161784	0.00272598
1	99899313	99901432	0.00272645
11	52553503	52554581	0.00272798
8	131274159	131276792	0.00273191
15	138574395	138575948	0.0027446
6	3870120	3873029	0.00275008
1	45169039	45172301	0.00275077
9	102893351	102894376	0.00275246
5	7946604	7949133	0.00276332
4	95917394	95926499	0.00276651
9	49160786	49165658	0.00276903
14	120908814	120914243	0.00276941
18	38226978	38228924	0.00277717
2	10015748	10018329	0.0027772
10	66321961	66322863	0.00277759
10	41879577	41880846	0.00277817
2	90296004	90298772	0.00277887
9	77686549	77687424	0.00277927
6	3860729	3862664	0.00278015
9	139353512	139354310	0.00278234
6	13714658	13717244	0.00278463
1	223428447	223429693	0.00278711
6	9739816	9743024	0.00278721
12	2548526	2549796	0.00278727
4	36453194	36454966	0.00278999
3	111427010	111430779	0.00279156
3	54835386	54836865	0.00279366
3	100081037	100083041	0.00279408
1	167993667	167995076	0.00279921
15	68220581	68221167	0.00280427
3	11215404	11220934	0.00280836
7	118047471	118048886	0.00280846
14	76611609	76614485	0.00281143
15	68865169	68866659	0.00281165
14	51705733	51706009	0.00281504
7	112243628	112248678	0.0028181
7	11525723	11532113	0.00282366
6	164867095	164868415	0.00282668
1	181108382	181109368	0.00282829
7	37889560	37891184	0.00283615
12	5853699	5857825	0.00283748
13	86572773	86575257	0.00284401
1	254516612	254518586	0.00285272
9	114106886	114110461	0.00285278
8	32157522	32159130	0.00285341
5	34815725	34819545	0.00285451
14	76392889	76394729	0.0028559
18	2934261	2937346	0.00286576
7	91833279	91836181	0.00286594
18	55737881	55739128	0.00286957
14	47183288	47186331	0.00287224
7	31488478	31489297	0.00287515
5	69016100	69019372	0.0028763
16	27217860	27219825	0.00287713
2	85567094	85569457	0.00287778
5	60132547	60134847	0.00287993
X	35292812	35294672	0.0028811
18	37917147	37919853	0.00288664
13	11357818	11361326	0.00289292
14	43094195	43095478	0.00289598
9	27279577	27282180	0.00289653
2	143442778	143446819	0.00289888
17	20462663	20463910	0.00290013
9	17445591	17447901	0.00290225
17	31003712	31012966	0.00290932
2	126353715	126359196	0.00291498
13	68266131	68266762	0.00291829
5	15690229	15696461	0.00291906
7	89094195	89095257	0.00291966
8	100276193	100277112	0.00292425
9	27998874	28000277	0.00292789
6	49085911	49087216	0.00293033
6	51271293	51272093	0.00293141
12	54831814	54832324	0.00293579
9	88002749	88006386	0.00293603
16	43088814	43089983	0.00293624
3	92108153	92110707	0.00294284
13	34604960	34623306	0.00294644
7	111729525	111730992	0.00297247
12	16730473	16735454	0.0029726
16	71331237	71334061	0.00297434
7	83054463	83056912	0.00297893
13	66108088	66109318	0.00298026
1	181025120	181029755	0.00298392
14	43089289	43092090	0.00298836
15	118919108	118920232	0.00298967
16	24692886	24694301	0.00299382
6	81346044	81352680	0.00300417
6	47325750	47327676	0.00301695
1	130394555	130400266	0.00302461
12	59099060	59101363	0.00303031
9	122679274	122681547	0.00303848
6	66926873	66930411	0.00304001
1	272820944	272824561	0.00304213
2	11717432	11719161	0.00304255
10	41337665	41341419	0.00304466
1	269879271	269883272	0.00304474
13	157002113	157004907	0.00304564
16	71328872	71330549	0.00305693
1	254845391	254850845	0.0030576
8	31638883	31642257	0.00306263
1	98676530	98678135	0.00306273
1	161944873	161955145	0.00306327
17	19588007	19590715	0.00307167
6	6700667	6704533	0.00307374
1	103787125	103787773	0.00308273
14	142375	143722	0.00308393
11	2331418	2334153	0.00308525
2	140438693	140443955	0.00308551
16	51490627	51493029	0.0030875
14	131667122	131667907	0.00308794
8	135636082	135639732	0.0030916
8	131809263	131810796	0.00309224
3	54171755	54174236	0.00309232
17	28028495	28034776	0.00309236
2	143498357	143500120	0.00309305
4	75475992	75478751	0.00310138
11	14436885	14438352	0.00310209
4	43415233	43415953	0.00310946
1	113489623	113492004	0.0031106
10	56507237	56508059	0.0031129
4	87908402	87912661	0.00311632
9	56222167	56224942	0.00311983
8	70131184	70133118	0.00312125
12	60402929	60405091	0.00312843
16	46922146	46923124	0.00312924
5	17229142	17232196	0.00313101
14	41060573	41062335	0.00313278
16	24640840	24649292	0.00313323
1	848436	858263	0.00313784
4	8168115	8169750	0.00314581
17	9447588	9450358	0.0031482
3	28601117	28602339	0.00315223
6	36433997	36437077	0.00315287
7	95982137	95984451	0.00315544
8	30114506	30116129	0.00315867
6	17703973	17705091	0.00315958
6	111147146	111149642	0.00316099
2	151447963	151450725	0.00316237
2	26541788	26544327	0.00317378
3	86617373	86622500	0.00318047
3	27321567	27322398	0.003182
1	187373987	187379593	0.00319033
4	103932873	103934723	0.00319532
15	48817608	48820056	0.00319657
14	47847000	47848756	0.00320495
6	27103654	27113557	0.00320795
1	122272623	122275055	0.0032083
13	84500520	84504793	0.0032141
3	110786438	110792533	0.00321631
2	87343327	87345102	0.0032188
7	98425602	98442125	0.00321909
11	25482921	25488889	0.00322078
6	52841840	52843167	0.00322702
4	89117890	89121588	0.00323076
5	19290231	19295103	0.00323108
1	271284693	271286837	0.003233
18	2850876	2851348	0.0032359
12	60248273	60249117	0.00323901
6	51778584	51782426	0.003241
6	47298350	47304459	0.00324401
1	181590274	181592875	0.00324744
10	43288734	43296324	0.00324967
7	53198628	53201403	0.00325314
15	80033733	80036681	0.00325585
10	16142027	16143831	0.00325792
1	94416153	94417497	0.00325914
5	11733315	11737732	0.00326682
15	110466340	110472261	0.00326867
1	226438367	226439952	0.00327094
7	12292608	12295877	0.00327249
3	9386191	9389771	0.00327475
10	63737918	63738980	0.00328245
11	22854408	22856905	0.00328713
9	33378515	33379915	0.00329374
13	115591886	115593168	0.00329379
12	40822023	40825469	0.00329421
17	10452868	10453247	0.00329471
16	26981114	26983187	0.00329773
6	105930810	105932020	0.00329822
5	49159153	49162113	0.00330055
2	47242418	47246293	0.00330578
14	47194747	47197463	0.003319
10	63072131	63075559	0.00331925
3	37952156	37957399	0.00332365
11	10039528	10042549	0.00332614
16	33282655	33284234	0.0033358
12	15633038	15634012	0.00333586
3	29186389	29189764	0.00334032
6	62622669	62624039	0.00334255
12	1958512	1959602	0.00334869
8	85833143	85834805	0.003359
2	151457820	151460116	0.00335943
4	36493664	36496995	0.00336835
1	190395524	190401826	0.00337141
14	66918779	66921636	0.00337478
12	5684566	5686192	0.00337602
6	65066332	65066796	0.00338083
10	44047881	44050152	0.00338393
5	3942610	3945791	0.00338798
1	94619217	94620095	0.00338836
17	26293807	26295228	0.00339094
14	92106172	92107517	0.00339115
3	113328581	113332513	0.00339324
1	179514102	179515143	0.00339982
3	154083	157037	0.00340133
1	1773931	1778306	0.00340359
12	46337118	46338339	0.0034036
14	134866076	134867588	0.00341504
17	54864581	54867203	0.0034168
17	42904071	42904790	0.00341753
7	121100429	121102909	0.00341842
6	156941322	156942967	0.00341869
1	223807126	223817127	0.00342327
6	17772971	17775217	0.00342983
7	59093369	59105355	0.00343019
10	47846552	47848423	0.00343352
14	76741535	76744042	0.00343642
6	107656520	107657695	0.00343916
7	93152303	93153466	0.00344136
2	78755280	78756464	0.00344772
6	52808093	52817288	0.00344935
16	24694749	24696191	0.00344974
12	44015556	44022145	0.00345067
1	223356272	223358943	0.00345088
14	28075165	28075607	0.00345351
7	34774175	34778082	0.00345452
9	2170713	2171770	0.00345711
4	107951875	107955628	0.00345946
X	51910344	51914379	0.00346531
10	48062658	48065778	0.00346894
6	83576917	83579902	0.00346928
15	138613298	138614747	0.0034764
16	51509145	51520366	0.00348455
3	31764389	31765074	0.00348909
14	38722871	38726034	0.00349069
14	3033481	3036745	0.00349098
16	46923360	46925184	0.00349863
7	49958947	49961207	0.0035003
11	12158332	12158900	0.0035084
6	13740089	13743872	0.00351682
3	102206617	102209103	0.00352333
14	2908388	2910328	0.00353482
17	54961326	54964775	0.00353609
11	7099768	7100769	0.00353866
5	57601972	57603514	0.00354169
3	73888500	73890559	0.00354788
8	70116726	70130788	0.00355567
15	118920760	118921587	0.00355637
17	51211889	51214681	0.00355944
2	75271478	75274945	0.00356112
7	120730059	120731516	0.00356791
10	66404977	66414289	0.00357172
6	45334946	45335708	0.00357467
13	29521271	29523201	0.00357988
1	85620978	85621449	0.00358102
15	48191416	48192964	0.00358489
15	48855189	48859728	0.0035913
7	4019600	4022456	0.00359181
6	153651268	153654519	0.00359302
11	4364904	4365889	0.00359669
4	76859331	76862067	0.00360877
6	105935666	105943135	0.00360899
1	158743882	158747859	0.00361344
6	15949180	15953079	0.0036147
17	52876847	52882317	0.00361806
3	10473607	10478555	0.00361816
2	64885860	64891747	0.00362674
10	41562641	41564660	0.00363759
1	14703257	14704645	0.00363999
15	64401344	64406285	0.00364264
3	58921018	58923846	0.00364372
17	19095583	19097439	0.00364585
6	69759764	69763073	0.00365592
15	45148593	45150322	0.00366085
15	56061444	56064993	0.00366419
6	83580272	83584431	0.00366885
14	15018297	15037527	0.00366992
5	67894977	67903297	0.0036725
3	131745132	131746854	0.00368751
2	79221014	79222904	0.00369645
18	29677927	29683526	0.0037031
12	36885026	36889112	0.00370519
7	4180788	4187813	0.00371179
1	17339613	17341679	0.00371271
14	109890021	109893100	0.003718
3	93256156	93265071	0.00371877
16	50848353	50850978	0.00371911
3	1004976	1006553	0.00372406
3	41058228	41060062	0.00373081
8	130870022	130871303	0.0037312
5	14372007	14374255	0.0037327
12	11373201	11375786	0.0037363
7	98140395	98143600	0.00374008
4	72456566	72461091	0.00374588
X	11953364	11954196	0.00375252
11	76584397	76585937	0.00375278
17	33594229	33594995	0.00375756
7	22228602	22229642	0.00376177
1	194262753	194264905	0.00376435
5	69986084	69990939	0.00376536
3	102089251	102091186	0.00377058
12	47948642	47953250	0.00377065
7	11519421	11520089	0.00377405
12	47816277	47821687	0.00377758
7	95977726	95979806	0.0037852
6	632102	633432	0.00379003
8	100186905	100189489	0.00379441
1	163811945	163814093	0.00379935
3	35295880	35296716	0.00381376
9	139301528	139303363	0.00381519
7	15162991	15163947	0.00381558
6	150982587	150985983	0.00381671
4	7647043	7649065	0.00382167
13	21741708	21744819	0.00382749
12	48167776	48178616	0.00383469
6	54848032	54849406	0.00383617
4	123260560	123262440	0.00384206
2	25780796	25784361	0.00384829
7	120284560	120286504	0.00384995
5	10582925	10585494	0.00385113
6	19223183	19225115	0.00385526
14	114706872	114708254	0.00385652
18	14317343	14320189	0.00385664
6	1259099	1260263	0.00385842
14	6945195	6953520	0.00386477
6	32080657	32087990	0.00386607
1	139319236	139323428	0.00386817
6	36207858	36213925	0.00387075
6	6840722	6843439	0.00387874
6	146689311	146690348	0.00388048
6	34966467	34967324	0.00388101
7	117428426	117429902	0.00388449
4	103865081	103868058	0.003889
13	147145434	147145986	0.00389744
3	106417540	106420691	0.00389802
13	25798910	25800813	0.00391135
12	60125942	60127851	0.00391296
6	78863120	78864395	0.00391425
18	41954691	41956422	0.00391473
12	14313483	14316754	0.00392148
3	1843680	1847137	0.00392935
17	35441814	35445456	0.0039298
4	110408865	110410230	0.00393048
14	72039287	72041316	0.00394283
12	53651604	53654097	0.00394327
13	69233724	69234955	0.0039488
6	146581061	146581798	0.00394998
12	11470223	11472844	0.00395181
4	36569210	36571362	0.00396005
3	52464248	52465877	0.00396288
9	74080270	74080859	0.00397202
1	76365280	76369080	0.0039862
12	5709571	5718116	0.00398698
3	24814736	24815612	0.00398796
12	35051941	35053129	0.00398869
6	34964804	34965563	0.00399165
14	22966992	22970790	0.00399354
9	366531	368906	0.00399914
16	48667545	48674019	0.00400117
16	71995364	72002913	0.00400649
13	74631494	74633472	0.00401299
2	70709784	70711171	0.0040258
12	3986348	3989812	0.00402729
10	47901542	47903342	0.00402804
13	180803289	180805623	0.00402869
1	99133897	99135079	0.00402905
7	40552609	40553407	0.00403136
13	26437661	26439094	0.00403428
3	11362214	11368102	0.00403471
4	96125727	96127595	0.00403877
5	18853622	18854257	0.00404131
3	97409275	97437061	0.00404413
10	28701688	28702774	0.00404471
7	117348248	117350547	0.00404485
10	41868582	41869806	0.00404746
5	100284228	100286636	0.00405106
3	56824309	56824970	0.00405222
16	65699695	65700041	0.00405245
1	159077266	159078901	0.00405332
8	121808441	121809278	0.00405547
7	51837985	51841265	0.00407521
7	98335362	98344868	0.00407821
6	103092331	103093777	0.00408891
15	30865777	30872005	0.00409025
X	515353	517893	0.00409065
5	9243913	9246015	0.00410341
1	112418887	112424499	0.00410411
11	15321819	15331554	0.00410453
9	10102542	10104989	0.00410846
5	17347785	17348987	0.00410933
4	85945376	85948937	0.00411935
6	156509074	156510640	0.00412677
6	79226343	79227782	0.00412986
1	119050015	119053097	0.00412999
1	108657706	108661233	0.00413127
13	97016825	97018327	0.00413761
6	91120232	91121848	0.00414444
2	149968553	149971912	0.00415776
1	127935938	127938656	0.00416164
9	63779521	63782105	0.00416834
7	59220701	59225478	0.00417172
14	61348212	61353798	0.00417581
6	9615678	9616599	0.00417924
2	6860751	6862094	0.00418745
14	113153797	113155679	0.00419283
18	14310889	14313898	0.00419429
9	50072394	50075366	0.00419653
7	56368547	56371708	0.00419683
1	16161586	16162338	0.0041986
14	88124786	88128129	0.00419948
18	53728206	53729321	0.00420301
6	34445497	34445943	0.00420511
1	13954621	13957130	0.00420954
14	38637188	38638930	0.00421404
6	69443301	69445474	0.0042152
3	58815724	58817999	0.00421587
17	39143215	39144982	0.00421625
5	19618117	19626319	0.00421672
1	223444675	223445343	0.00421912
3	3651338	3654417	0.00422931
14	132046552	132050487	0.00423385
7	8051600	8053962	0.00423578
3	130435567	130436319	0.00423873
1	24151479	24154496	0.00424056
3	131707675	131708942	0.00424255
14	89483903	89485009	0.00424377
16	46241307	46243977	0.00424709
3	27489139	27493621	0.00424885
14	123868004	123871821	0.00425184
14	114674580	114677535	0.00425439
1	32433195	32435582	0.00427159
16	51316780	51318033	0.00428093
3	97137995	97142060	0.00429192
9	47330310	47333444	0.00429379
17	30171368	30173173	0.00429858
1	122275747	122278623	0.00429868
2	75850484	75851400	0.00430413
3	57319867	57321244	0.00430898
14	42338222	42339254	0.00431858
15	131115820	131117480	0.00432535
5	70106361	70109588	0.00433279
11	23898161	23898521	0.00433283
14	88702777	88705169	0.0043334
13	110523887	110524425	0.00433425
5	57950338	57952739	0.00433561
13	173647757	173650762	0.00433654
15	68900314	68902717	0.00433702
6	34165483	34168359	0.00433765
12	44615044	44621741	0.00434053
3	77122430	77126351	0.00434371
12	45401714	45404334	0.00434385
2	119651820	119652576	0.00434481
15	60192160	60194498	0.00434705
12	15424413	15427977	0.00435296
11	48958542	48963781	0.00435549
13	68280129	68281450	0.00435668
3	31131327	31134140	0.00435693
14	8226602	8227942	0.00435885
2	9063671	9067477	0.00435987
2	80466925	80468103	0.00436427
5	11935609	11937840	0.00438273
4	98210996	98214282	0.00438568
6	55132927	55135817	0.0043864
2	150104541	150106327	0.00438741
5	11704647	11705541	0.00439162
10	42575756	42578589	0.00440067
15	33368800	33371050	0.00440239
X	88137351	88142441	0.00440665
14	138090345	138094378	0.00441049
1	181427797	181428543	0.00441791
11	64290706	64292023	0.00442356
14	61873623	61874272	0.00442744
5	17180058	17182476	0.00443574
14	54262860	54263791	0.00443688
11	77124430	77129670	0.00444748
12	46823359	46827035	0.0044516
12	33223951	33225302	0.00446943
7	60361398	60362216	0.00447493
4	118437382	118438549	0.00447853
14	15040290	15053352	0.00448536
13	68435917	68443120	0.00448801
3	85760247	85761400	0.00449368
8	28330120	28331504	0.00449943
14	47851218	47858567	0.00450012
12	5003099	5003600	0.00450385
4	36640257	36640908	0.00450504
8	82366465	82372013	0.00450688
3	17098098	17102691	0.00451561
1	273104047	273105503	0.00451594
6	75609369	75610758	0.00453175
1	129363108	129364138	0.00453606
1	29610014	29614367	0.00455327
1	84237975	84239089	0.0045564
7	32686336	32695450	0.00456138
8	70154912	70158948	0.00456386
9	20032170	20043822	0.00457264
17	27976666	27980358	0.00457283
6	1240646	1243623	0.00457578
7	38197413	38198121	0.00458176
12	18741843	18743895	0.00458759
16	74367635	74369456	0.00458766
16	52736136	52738193	0.00458892
4	106547954	106550423	0.00459227
5	41763772	41768800	0.00459534
14	133375645	133376955	0.00459942
3	128835905	128839089	0.00460074
4	36511301	36512694	0.00460177
15	67736009	67738963	0.00460242
12	11452350	11453141	0.00460648
13	131295267	131297770	0.00461012
3	96832102	96834734	0.00461179
13	125589024	125590708	0.00461205
5	30188993	30189944	0.00461415
4	123221785	123222803	0.00461838
9	25970037	25973365	0.00461958
13	132543982	132546626	0.00462106
3	59172541	59183676	0.00463173
1	269741273	269743260	0.00464577
5	14059947	14062507	0.00464762
2	64763754	64767489	0.00465061
4	14150563	14151593	0.00465067
15	137531924	137534012	0.00465323
3	103758616	103761707	0.00465787
6	83585361	83587765	0.00465871
[truncated: 1,163 more rows]

## Sheet: Peak-associated genes
Differential peak-associated genes
AAK1
AARS2
ABCA4
ABCA5
ABCA6
ABCA8
ABCA9
ABCC5
ABCG2
ABHD12
ABI2
ABI3BP
ABL1
ABLIM3
ABR
ACADM
ACAP2
ACCSL
ACE
ACLY
ACO2
ACOT7
ACSS1
ACSS3
ACTN4
ACTR3
ACVR1B
ACVRL1
ADA
ADAM11
ADAM28
ADAM33
ADAMTS10
ADAMTS15
ADAMTS17
ADAMTS2
ADCK2
ADCY2
ADCY9
ADCYAP1R1
ADGRD1
ADGRE5
ADGRV1
ADM
ADRA1A
AEN
AFF1
AGAP1
AGO2
AGT
AGTR1
AKT2
ALAS1
ALPK2
ALX1
AMOTL2
ANGPT4
ANKDD1B
ANKHD1
ANKRD40CL
ANPEP
ANTKMT
ANTXR2
ANXA2
ANXA4
APBB2
APOD
APOE
ARAP1
ARHGAP10
ARHGAP12
ARHGAP22
ARHGAP23
ARHGAP26
ARHGAP27
ARHGAP31
ARHGAP35
ARHGEF10L
ARHGEF3
ARHGEF6
ARID1B
ARID5B
ARL15
ARL2BP
ARL3
ARMC2
ARMC5
ARMH3
ARNT2
ARNTL2
ARPC5
ARSJ
ASAP3
ASB5
ASCC1
ASPA
ASPDH
ATF6
ATOH7
ATP11A
ATP2B2
ATP2B4
ATP6V0D1
ATP6V1A
ATP6V1G1
ATP8B1
ATP8B4
ATP9A
ATXN1
ATXN7L1
AUNIP
B3GNT2
B4GALT5
BABAM2
BACH2
BANP
BAZ1A
BBS9
BBX
BCAR1
BCAS1
BCKDHB
BCL11B
BCL7A
BCO1
BCR
BDKRB2
BFAR
BFSP2
BHLHE41
BICC1
BICRA
BICRAL
BIN3
BLNK
BMP4
BMPER
BNC2
BRD4
C10orf105
C12orf49
C12orf66
C16orf87
C1orf232
C1QTNF1
C1QTNF7
C3orf20
C6
C9orf43
CA12
CA6
CACNA1E
CACNA1H
CALCOCO2
CALD1
CAMK4
CAMTA2
CANT1
CAPN10
CARM1
CARMIL2
CARNMT1
CASP7
CAT
CAV1
CBFA2T3
CBLC
CBX8
CCDC12
CCDC146
CCDC152
CCDC170
CCDC33
CCDC6
CCDC69
CCDC80
CCDC90B
CCDC92
CCL2
CCN5
CCNA1
CCNG2
CCNL1
CCR7
CCT2
CD180
CD248
CD302
CD44
CD53
CD80
CD9
CDC14A
CDC37
CDC42EP4
CDH11
CDH13
CDH20
CDH23
CDH5
CDHR2
CDK13
CDKL1
CDO1
CDON
CDS1
CDX1
CELF2
CENPP
CEP112
CEP170
CERCAM
CERS4
CFAP45
CFAP99
CHD7
CHMP7
CHRNA1
CHRNA4
CIART
CILP
CISH
CITED2
CLCA4
CLDN3
CLEC16A
CLMP
CLU
CLUAP1
CMIP
CMKLR1
CNNM4
CNOT9
CNTFR
CNTN3
COG5
COIL
COL10A1
COL12A1
COL15A1
COL1A1
COL1A2
COL27A1
COL28A1
COL3A1
COL4A2
COL5A1
COL5A2
COL6A1
COL6A3
COL8A2
COLEC12
CORO1C
CORO2B
COX17
CPED1
CPNE8
CPQ
CPXM2
CRABP2
CRCP
CREB3L1
CREB3L3
CREB5
CREM
CRIM1
CRISPLD2
CROCC2
CRPPA
CRTAP
CRTC3
CRY2
CRYM
CSF1R
CSF3
CSNK1D
CSRP1
CTIF
CTNNBIP1
CTSB
CTSS
CTTNBP2NL
CUBN
CUX1
CXCL2
CXCR4
CXXC5
CYB5R3
CYBRD1
CYP27A1
CYP2B22
CYP4V2
CYP7B1
CYTH3
DAAM2
DAB2
DAB2IP
DACH1
DAPK1
DBP
DCLK1
DCN
DCTN2
DDAH1
DDR2
DDX20
DDX21
DDX49
DECR1
DERL1
DHRS1
DIAPH1
DISP1
DLC1
DLGAP1
DLGAP3
DLL1
DLL4
DMRT2
DMRTC2
DNAAF2
DNAJB1
DNAL4
DNASE1L1
DNM2
DNM3
DOCK4
DOCK9
DOT1L
DPF1
DPF3
DPH6
DPYD
DST
DUSP5
DYM
DYNC1I1
DYSF
E4F1
EBF1
EBF2
EBF3
ECE1
ECM2
EDEM2
EEPD1
EFCAB11
EFEMP1
EFHB
EGFLAM
EGFR
EGR1
EGR3
EIF3M
EIF4E3
EIF4G3
ELL
ELMO2
ELN
EMC3
EMID1
EMILIN2
EML1
EMX2
EN1
ENGASE
ENPP2
ENTPD1
EPB41L2
EPB41L3
EPC1
EPHB3
EPS8L2
ERAP2
ERCC3
ERG
ERG28
ERGIC1
ERP27
ESAM
ESR1
ETV3
ETV4
ETV6
EVA1C
EXOC3L1
F2RL2
FADS2
FAH
FAM102B
FAM110D
FAM114A1
FAM117A
FAM160A2
FAM160B2
FAM170B
FAM180B
FAM20A
FAM20C
FAM214A
FAM89A
FAT1
FBL
FBLN1
FBLN2
FBLN5
FBLN7
FBRSL1
FBXL13
FBXL19
FBXO22
FBXO32
FCHSD2
FDFT1
FGD5
FGF1
FGF10
FGF12
FGF18
FGFR1
FGL2
FHL2
FIBIN
FIGN
FIGNL1
FKBP10
FKBP5
FKBPL
FLNC
FLT1
FLVCR2
FMNL2
FNBP1
FNDC3B
FOS
FOSB
FOSL2
FOXC1
FOXK1
FOXN3
FOXO1
FOXP2
FRMD4A
FRMD6
FRRS1
FSCN1
FST
FSTL1
FTL
FUT8
FUZ
FYB1
FYCO1
FYN
FZD1
FZD2
FZD4
G3BP2
GABRG2
GALK2
GALNTL5
GASK1A
GASK1B
GATA2
GATA6
GATAD2A
GATM
GBE1
GCNT2
GCNT3
GGN
GGT5
GHR
GIT1
GKAP1
GLI2
GLI3
GLIPR1
GLIS3
GMDS
GNA12
GNAZ
GNB1
GNGT1
GOLIM4
GP5
GPAT4
GPNMB
GPR135
GPR17
GPR39
GPR4
GPRC5D
GPX3
GRK5
GRWD1
GSN
GSTO2
GSTZ1
GTDC1
GTF2F2
GTF2I
GXYLT2
H1-2
HAAO
HAO2
HCRTR1
HDAC4
HDAC9
HDHD5
HEMK1
HIF3A
HIPK2
HJV
HM13
HMGN3
HNRNPUL1
HOMER1
HOXA10
HOXB9
HOXC4
HOXC6
HOXD1
HOXD3
HPGD
HPSE
HPSE2
HS1BP3
HSPBP1
HSPG2
HSPH1
HTR4
HTRA1
ICA1L
ICK
IFNLR1
IGF1
IGF2BP2
IGFBP2
IGFBP4
IGFBP5
IL10RB
IL12RB1
IL16
IL1R1
IL34
IL7R
ILK
INHBB
INO80
INPP4A
INPP5A
INTS1
INTS3
IPO11
IPPK
IQGAP2
IRF2
IRS1
IRX1
IRX2
IRX3
IRX5
ISCU
ITGA1
ITGA5
ITGA9
ITGB3
ITGB4
ITGB6
ITIH5
ITPR2
ITPRIPL1
ITSN1
JADE1
JAKMIP2
JAML
JARID2
JAZF1
JMJD1C
JPH4
KANK2
KAZN
KCNAB2
KCNE4
KCNJ16
KCNK13
KCNK3
KCNQ1
KCNQ3
KCTD12
KCTD4
KCTD9
KDM4B
KDSR
KERA
KIAA0513
KIAA2012
KIRREL1
KLF6
KLF7
KLHDC2
KLHDC8A
KLHL3
KMT2C
KMT5A
KRBA1
KSR1
L3MBTL3
LAMA3
LAMA4
LAMB1
LAMC1
LAPTM4A
LAPTM4B
LAT2
LDB2
LGALS3
LHFPL2
LHFPL6
LIMCH1
LIMK1
LINC01862
LIPC
LITAF
LMCD1
LMNA
LMNTD1
LMX1A
LMX1B
LNX1
LONP2
LOX
LOXL2
LPAR1
LPIN1
LPP
LRFN3
LRIG1
LRIG3
LRP11
LRP5
LRP6
LRRC10B
LRRC2
LRRC32
LRRC6
LRRC70
LRRC75A
LRRC8C
LRRFIP2
LRRK1
LSP1
LTBP1
LTBP2
LUM
LURAP1L
LVRN
LYRM1
MAB21L3
MAGI2
MAMDC2
MAML2
MAP1A
MAP1B
MAP3K13
MAP3K14
MAP3K4
MAPK10
MAPK11
MARK2
MASP1
MAST4
MAT2B
MBD1
MBP
MCAM
MCF2L2
MCM2
ME3
MED15
MED25
MED9
MEDAG
MEF2D
MEGF6
MEIS1
MEIS2
METTL24
METTL8
MFAP2
MFHAS1
MFSD14B
MGST1
MICAL3
MIF
MINDY4
MIR10A
MIR199A-1
MIR199B
MIR212
MISP
MKNK1
MKX
MLH1
MLIP
MME
MMEL1
MMP14
MMP2
MMP27
MOB3C
MPC2
MPPE1
MRC1
MRC2
MRGPRF
MRPL33
MRPL4
MRPL45
MRTFA
MRTFB
MSMB
MSN
MTHFD1L
MTR
MTUS2
MUL1
MXRA8
MYB
MYH14
MYLK
MYMK
MYO3B
MYOC
MYOM3
MYORG
MYRFL
NAGS
NALCN
NAPSA
NAV1
NAV2
NAV3
NCAPH
NCF2
NCOA7
NDUFAF6
NDUFS2
NECTIN4
NEDD9
NETO2
NEU3
NFATC2
NFIA
NFIC
NFIX
NFKBIA
NFKBIL1
NHLRC3
NIBAN2
NID1
NIPAL2
NISCH
NKX1-2
NME1
NMT1
NOD2
NOL4L
NOLC1
NOS3
NOSTRIN
NOTCH2
NOVA2
NPAS1
NPC1
NPEPPS
NPSR1
NR1D1
NR1I3
NRBP2
NREP
NRROS
NSD3
NSMCE2
NT5DC1
NTM
NUPR1
OAF
ODC1
OLFML2A
OLFML3
OPTN
OSBPL1A
OSBPL5
OSBPL6
OSR1
OTUB2
OXNAD1
P14ARF
P3H4
P4HA1
PACC1
PACSIN3
PAK1
PALLD
PALM2AKAP2
PAPPA2
PARD3
PARD6B
PARP8
PARVA
PARVB
PBX1
PC
PCDH1
PCDH9
PDCD4
PDE2A
PDE3A
PDE4B
PDE7B
PDGFRA
PDGFRL
PDLIM1
PDLIM7
PDPR
PDSS1
PDZRN3
PEBP4
PECAM1
PELI1
PENK
PEX2
PFDN1
PGAP4
PGS1
PHF7
PHLDA2
PHLDB2
PHLPP1
PICALM
PID1
PIK3AP1
PIK3C2B
PIK3R1
PIK3R6
PINK1
PIP4P2
PIR
PITPNM2
PITX3
PKD1
PKD2L1
PLA1A
PLA2G4E
PLAU
PLB1
PLBD1
PLCG2
PLD1
PLEC
PLEK
PLEKHA2
PLEKHA6
PLEKHD1
PLEKHF1
PLEKHG1
PLEKHG5
PLEKHH2
PLEKHM3
PLOD1
PLSCR4
PLVAP
PLXDC1
PLXDC2
PLXNA1
PLXNA2
PLXNA4
PMP22
POC1A
POLI
POLR3H
POPDC2
PPA1
PPAN
PPARA
PPARG
PPARGC1A
PPFIA1
PPFIBP2
PPL
PPM1E
PPM1H
PPP1R13L
PPP1R14A
PPP1R21
PPP2CA
PPP2R1B
PPP2R2A
PPRC1
PPTC7
PRDM2
PRELP
PRICKLE2
PRKACB
PRKAG2
PRKCE
PRKCSH
PRMT8
PRNP
PRPF6
PRR16
PRRX1
PRRX2
PRSS16
PRSS22
PRUNE1
PSAP
PSD3
PTAFR
PTBP3
PTGFR
PTGR1
PTK2B
PTK7
PTP4A1
PTPDC1
PTPN1
PTPN13
PTPN2
PTPN5
PTPRE
PTPRG
PTPRM
PTPRS
PTPRU
PURA
PWWP3A
PXDN
PXYLP1
QDPR
RAB22A
RAB30
RAB3IL1
RAB40B
RAB8B
RAD51B
RAD52
RADIL
RAI1
RALGPS1
RAMP1
RAPGEF1
RAPGEF5
RASAL1
RASGEF1B
RASGRF2
RASGRP4
RASIP1
RASSF3
RBFOX1
RBFOX2
RBFOX3
RBKS
RBM10
RBM47
RBMS1
RCBTB2
REEP3
REM1
RET
REV1
RFC1
RFTN1
RFX2
RGCC
RGMA
RGS10
RGS16
RGS3
RGS6
RGS7BP
RHBDF2
RHOJ
RIN2
RIPK3
RIPOR1
RIPOR2
RIPOR3
RND1
RNF112
RNF114
RNF144B
RNF145
RNF19A
RNF216
ROBO2
ROBO3
ROR2
RORA
RPL15
RPL31
RPL7A
RPRM
RPS6KL1
RPTOR
RPUSD3
RRM1
RSPO3
RSRC1
RTKN
RTN2
RUNDC3A
RUNX2
RXRA
RYR2
S100A5
S100Z
SAMD5
SAP30BP
SARDH
SASH1
SCD
SCD5
SCFD2
SCIMP
SCMH1
SCML4
SCNN1A
SDC2
SDCCAG8
SDHC
SDK1
SELENOP
SELENOV
SEMA3D
SEMA3F
SEMA6B
SEMA7A
SEPTIN1
SEPTIN7
SEPTIN9
SERGEF
SERPINF1
SERPINH1
SERTAD2
SESN1
SESN3
SETBP1
SETD7
SFRP1
SFTPD
SH2D3C
SH3BP5
SH3PXD2A
SH3PXD2B
SH3RF2
SHANK3
SHD
SHE
SHISA3
SHLD1
SHROOM4
SIGIRR
SIRPB2
SIX1
SKI
SLC16A12
SLC16A7
SLC16A9
SLC1A2
SLC1A3
SLC1A7
SLC22A18
SLC22A23
SLC22A7
SLC25A44
SLC27A3
SLC28A1
SLC29A3
SLC35E2B
SLC36A1
SLC43A2
SLC4A1AP
SLC4A4
SLC5A10
SLC6A2
SLC6A6
SLC7A1
SLC7A2
SLC7A7
SLC8A1
SLC8B1
SLC9A8
SLC9A9
SLCO4A1
SLCO5A1
SMAD1
SMAD3
SMAP1
SMG6
SMG9
SMPDL3A
SMTN
SMYD4
SNAI1
SNAI2
SNAP25
SNCAIP
SNORD83A
SNRK
SNRPD1
SNTB2
SNX22
SNX24
SNX29
SNX30
SNX33
SNX6
SNX8
SNX9
SOD3
SORBS1
SOX17
SOX18
SOX5
SP3
SP5
SPARC
SPIDR
SPNS1
SPNS2
SPON1
SPON2
SPRED3
SPRY1
SPRYD3
SPSB1
SPSB4
SPTAN1
SPTBN1
SQSTM1
SRSF3
SS18
SSBP3
ssc-mir-125b-1
ssc-mir-125b-2
ssc-mir-615
ssc-mir-7140
ssc-mir-7141
ssc-mir-9798
ssc-mir-9837
SSTR3
ST7L
STAC3
STAT3
STIM1
STK19
STMN4
STOX2
STX1B
STX3
SUGCT
SULF1
SUN1
SUSD6
SVIL
SYAP1
SYBU
SYN2
SYN3
SYNE2
SYNE3
SYNJ1
SYNJ2
SYNPO
SYT7
TACC2
TAFA1
TAL1
TANC2
TANGO2
TBC1D1
TBC1D20
TBC1D22A
TBC1D2B
TBC1D31
TBC1D5
TBR1
TBX18
TBX2
TBXA2R
TCF23
TCF4
TCF7L2
TCHP
TEAD1
TEAD2
TEAD4
TEF
TENM3
TES
TG
TGFB2
TGFB3
TGFBI
TGFBR3
TGM2
THBS2
THOP1
THPO
THRB
THSD1
THY1
TICAM1
TIMP3
TLN2
TM6SF1
TMBIM6
TMC6
TMCC1
TMCC3
TMED10
TMEM104
TMEM135
TMEM138
TMEM236
TMEM266
TMEM30A
TMEM54
TMEM59L
TMEM61
TMEM82
TMEM92
TNFAIP6
TNFAIP8L1
TNFAIP8L2
TNFRSF11A
TNFRSF9
TNFSF15
TNIK
TNRC6B
TNS1
TNS4
TOM1L2
TOR2A
TP53INP1
TPCN1
TPM1
TPM4
TPPP
TPRG1
TPST1
TPX2
TRAF3IP2
TRAK1
TRAM2
TRAPPC9
TRDMT1
TREML2
TRIB2
TRIM44
TRIP12
TRPC4AP
TRPM3
TSEN54
TSPAN1
TSPAN15
TSPAN5
TSTA3
TTC1
TTC21A
TTC28
TTC7B
TTLL1
TTLL5
TTLL9
TTYH3
TUBB
TULP3
TVP23A
U6
UBE2V2
UBE3D
UBL7
UBOX5
UBTD1
UCK2
UPP1
USP10
USP54
UVRAG
VAC14
VAMP5
VASN
VAV2
VAV3
VCAN
VCL
VDAC1
VGLL3
VPS13D
VPS53
VSIG8
VSTM4
VTN
VWA8
VWF
WASF2
WASF3
WDFY2
WDFY4
WDR24
WDR36
WDR60
WDR70
WEE1
WNT10B
WNT2B
WT1
WWOX
XPO7
XXYLT1
XYLT1
YIPF1
ZBTB20
ZBTB45
ZC2HC1B
ZC3H12D
ZCCHC14
ZCCHC24
ZCCHC4
ZDHHC1
ZDHHC14
ZDHHC18
ZDHHC7
ZEB1
ZFHX3
ZFHX4
ZFYVE1
ZHX2
ZHX3
ZIC1
ZIC4
ZNF184
ZNF274
ZNF385D
ZNF423
ZNF502
ZNF516
ZNF532
ZNF536
ZNF606
ZNF618
ZNF628
ZNF660
ZP4
ZSCAN23

## Sheet: overlapped genes
Gene symble
AAK1
ABCA5
ACADM
ACAP2
ACSS3
ACTR3
ACVR1B
ADAMTS2
AFF1
AGAP1
ARHGAP26
ARHGEF3
ARID1B
ARMC5
ARPC5
BANP
BCL11B
BFAR
BRD4
CDHR2
CERS4
CLEC16A
COL5A1
CRTAP
CRYM
CYP2B22
CYP4V2
DLGAP1
DNM2
DOCK9
DYSF
EBF1
EBF3
EEPD1
EGFR
FGF12
FKBP5
FRMD4A
FUT8
GLI3
GPR135
GPR39
GTDC1
HPGD
HTRA1
ITPRIPL1
KCNQ3
KDSR
KLF7
LDB2
LMCD1
LMNA
LPP
MAGI2
MAML2
MCF2L2
MEDAG
MPPE1
MTR
MYLK
NAV2
NCOA7
NFKBIA
NR1D1
PBX1
PDCD4
PDE2A
PDE4B
PDPR
PHLPP1
PLD1
PLXNA4
PPFIBP2
PPP1R21
PRKACB
PSD3
RAD52
RAPGEF5
RBKS
REV1
RIN2
ROR2
RYR2
SASH1
SERTAD2
SH3PXD2B
SKI
SLC29A3
SMAP1
SPIDR
SPSB1
STAT3
TBC1D1
THOP1
TNIK
TRAPPC9
TRIP12
TSPAN15
TTC28
VAV3
VSTM4
VWA8
ZHX3
ZNF536
