# Supplementary material for: Chromatin accessibility landscape of stromal subpopulations reveals distinct metabolic and inflammatory features of porcine subcutaneous and visceral adipose tissue
Source: PeerJ. 2022 May 24;10:e13250. doi: 10.7717/peerj.13250 (PMC9138157; doi:10.7717/peerj.13250)
Supplement: Supplemental Information 5 [file peerj-10-13250-s005.xlsx]

## Sheet: Overlapped H3K27ac peaks in SAT
Chromosome	Start site	End site	Number of overlapped base
14	81764285	81765164	10
13	74702078	74705068	12
6	59254071	59254826	13
12	18269339	18270775	13
12	18267069	18269068	13
X	46758644	46759478	14
9	75214884	75215796	15
X	37080345	37081130	15
6	452931	455435	16
8	4389946	4392541	16
1	158862905	158863497	18
1	236340123	236342225	20
15	80700530	80701332	20
18	11150182	11151809	20
2	142164823	142165942	21
14	41755957	41757193	22
6	97324689	97325603	24
10	14596032	14596995	25
12	47915915	47918299	25
6	85327252	85328924	26
6	51589770	51591384	27
7	33085187	33085648	27
2	40309793	40310495	28
3	40307241	40308117	29
4	83776776	83777519	29
7	29694838	29695531	29
13	93306909	93312849	30
X	46756688	46758380	30
7	81668453	81669625	31
8	44544402	44545857	32
7	23852938	23854159	33
11	2421927	2422701	33
6	52294511	52295282	34
6	85533510	85535502	34
8	4123132	4124357	34
12	53369912	53376738	34
3	57423986	57426543	35
3	40184767	40186540	37
3	39776841	39777803	39
12	22258604	22265003	39
14	40309281	40310611	39
X	42846604	42847418	40
15	120344047	120345243	42
2	80527552	80528846	43
9	131076975	131077590	44
9	6318597	6319256	45
13	7153325	7154135	45
14	55749402	55750686	45
2	71871252	71871833	47
8	96690950	96692398	47
9	106963907	106965616	47
10	43018269	43018704	47
13	132427420	132431396	47
3	40092632	40093875	48
6	145186753	145188639	48
7	75756910	75757581	48
4	90720692	90722083	49
12	27118159	27119949	49
18	51908199	51909255	52
1	107690067	107691329	53
5	19522566	19523908	56
7	38387605	38388901	56
8	38982621	38984606	57
2	7925235	7926146	58
18	42410855	42411633	58
12	1116330	1121349	59
8	96692732	96695115	60
9	6980514	6981914	60
10	14597334	14598554	61
12	49917775	49918833	61
5	19484185	19486536	62
13	47743561	47744524	65
15	138657785	138658969	66
2	59611898	59612961	67
8	4120856	4122929	67
7	97380868	97381901	69
13	202576262	202576927	69
7	64122419	64123872	70
10	17365589	17366816	70
3	8506908	8511405	73
9	102349002	102349927	73
13	34074696	34075429	75
15	126285963	126287170	76
6	48726710	48728396	77
14	54651430	54652806	77
6	55970547	55972115	78
13	34075661	34077478	78
13	87754008	87754888	79
17	10691672	10693775	79
2	46023706	46025168	80
9	6319508	6320652	81
12	1084396	1085932	81
1	187385299	187387041	82
9	52301928	52302705	83
10	43096668	43097308	83
1	269450346	269455483	84
6	67605881	67606964	85
1	268236394	268237507	86
3	39774846	39776574	86
1	235867818	235869719	87
2	70876756	70877496	87
8	1210132	1216894	87
6	68485116	68487321	88
6	55989304	55991440	89
2	7922880	7924904	91
2	18610664	18611778	91
1	270748526	270749118	92
10	59874532	59875310	93
12	1518553	1519493	93
18	32798235	32799426	94
X	11409165	11409790	94
10	24458664	24459102	95
10	46647212	46648201	96
12	52954710	52956356	96
13	133689703	133691184	98
12	45503858	45506609	99
16	18535364	18537939	99
1	167853025	167857753	100
13	160063986	160064988	100
5	12237739	12242562	101
10	24922754	24923571	101
2	77740675	77743471	102
7	29693589	29694418	102
1	238176315	238177478	104
6	47652726	47655686	104
2	61450782	61452969	105
12	38461752	38462822	105
17	48074396	48076095	105
13	10714582	10716092	106
14	49792296	49793236	106
3	40091739	40092299	107
6	59516999	59518731	107
6	34119577	34121336	109
7	23244849	23245700	109
1	158860057	158862655	110
9	131275537	131276860	110
11	2553995	2554713	110
6	68487580	68492576	111
6	67604396	67605520	113
13	179320612	179321246	115
1	179686838	179688602	116
2	65211944	65213634	119
3	18609950	18610878	119
14	128961955	128963132	119
2	69028166	69029788	120
6	19967685	19969393	120
11	77273128	77273771	120
2	83745269	83746118	121
X	45909720	45910634	121
2	79511582	79512034	122
6	60879583	60881107	122
6	91406596	91408315	122
9	52726830	52728071	123
13	151298540	151299098	123
13	48024327	48027374	126
14	46091954	46093215	126
3	126738770	126740255	128
12	24224288	24225236	128
16	63409869	63410991	128
6	455731	457776	130
5	23040893	23042101	131
5	83935601	83937206	131
1	139191436	139192418	132
7	31313130	31314133	132
12	27120249	27121714	132
5	22389457	22390134	137
6	70241779	70242655	139
1	19612929	19614237	140
3	109194629	109196651	140
12	44403003	44403919	140
6	54786450	54789352	143
6	146986275	146987369	145
12	25969322	25971405	145
14	39578402	39579827	146
17	30351378	30352266	147
2	65371256	65372185	149
12	47912165	47915611	149
2	46025376	46026063	150
6	27538928	27540169	150
15	110919559	110921400	150
18	29363582	29365264	150
1	2541495	2542943	151
11	446981	447944	153
13	39789711	39792992	154
6	70240310	70241524	157
8	70054363	70055176	157
14	77405294	77406687	158
2	76475508	76477239	159
7	8518663	8520760	159
7	55811777	55812568	159
14	29542396	29543538	159
1	265866234	265867157	160
2	61448371	61450464	160
17	10690787	10691388	160
13	123928730	123930186	162
5	21747737	21749102	163
9	105387924	105388943	163
1	267480719	267481842	165
4	75645298	75646199	165
6	83089985	83092923	165
7	61108479	61108990	167
12	52168177	52170395	170
15	126287454	126287875	170
17	40774718	40775503	171
3	72545607	72547455	172
13	26693844	26694488	172
1	253393103	253393940	173
14	46874920	46876502	173
2	5480897	5481750	174
9	122237902	122238847	174
2	74134670	74136186	175
9	109260693	109262032	176
6	55939690	55940985	177
14	16709949	16711242	177
1	161321322	161321771	178
2	89254868	89255849	178
2	18238384	18239295	180
12	15349332	15350994	183
13	25751611	25752362	183
7	112751907	112753359	184
13	30319319	30320580	184
6	89316915	89318103	188
2	142166234	142167662	189
5	18586732	18588265	189
7	42031537	42033421	189
15	110874092	110875482	189
6	47493875	47510400	191
2	7075281	7077328	192
3	39511152	39512749	193
13	61640565	61642286	193
4	111292473	111294044	195
6	8527220	8529018	195
6	72256780	72258193	195
8	4095174	4095859	195
10	25634442	25636040	197
4	15997934	15998907	198
1	4246050	4250871	199
1	4890578	4896112	199
1	10224208	10228574	199
1	10232526	10233717	199
1	17339612	17341679	199
1	19095287	19098721	199
1	21230102	21232185	199
1	25480144	25482762	199
1	27345368	27346683	199
1	35925249	35927392	199
1	55859473	55860989	199
1	57126941	57131324	199
1	73160843	73163368	199
1	74077111	74079935	199
1	74347807	74350174	199
1	74625746	74631378	199
1	75075725	75080217	199
1	119945959	119949201	199
1	126824557	126826753	199
1	127813032	127815239	199
1	130746154	130747445	199
1	130872077	130874625	199
1	139802694	139805569	199
1	145706526	145708669	199
1	149736822	149738738	199
1	158860057	158862655	199
1	161768510	161769729	199
1	165050036	165061108	199
1	175145466	175147453	199
1	179711532	179715560	199
1	180013275	180016384	199
1	181515293	181518891	199
1	182422289	182424085	199
1	185397277	185399348	199
1	222989642	222990613	199
1	237171708	237173661	199
1	238567074	238568747	199
1	239917521	239919581	199
1	263820462	263822535	199
1	268529801	268535458	199
1	269055650	269058072	199
1	269879270	269883272	199
1	272685218	272687730	199
2	6884718	6886995	199
2	12529948	12538395	199
2	13176024	13177572	199
2	15366045	15369718	199
2	16162284	16166804	199
2	16342651	16346954	199
2	26826332	26828197	199
2	57323925	57328385	199
2	58505181	58507451	199
2	60232935	60235965	199
2	60959604	60962303	199
2	61061721	61064443	199
2	64835452	64837555	199
2	65936204	65939472	199
2	69364821	69367414	199
2	73130377	73132076	199
2	76657554	76661961	199
2	77191809	77215067	199
2	78337166	78339400	199
2	79548133	79550775	199
2	80395550	80397692	199
2	82659749	82661437	199
2	85889291	85891962	199
2	85889291	85891962	199
2	89043618	89047411	199
2	89839240	89841324	199
2	105201159	105204493	199
2	116803197	116805424	199
2	129806424	129809448	199
2	131015207	131017595	199
2	133474304	133476383	199
2	136520853	136523921	199
2	136956792	136958553	199
2	142312491	142313994	199
3	6441562	6443539	199
3	10842113	10844987	199
3	11704462	11707934	199
3	19367318	19370065	199
3	38040132	38041994	199
3	43914524	43916766	199
3	47470254	47471311	199
3	52305977	52309394	199
3	55373253	55377422	199
3	55832716	55835039	199
3	56276235	56279354	199
3	57928191	57929826	199
3	86781811	86785410	199
3	87230644	87235032	199
3	98153543	98156751	199
3	107541235	107543979	199
3	113227985	113230100	199
3	114249710	114252192	199
3	126085679	126089018	199
3	127243868	127244873	199
4	14293417	14300020	199
4	14698800	14701798	199
4	16286618	16288090	199
4	35837501	35839361	199
4	36653206	36656474	199
4	38716083	38717976	199
4	39111242	39114282	199
4	56172890	56175534	199
4	57819047	57820377	199
4	75191172	75192978	199
4	77109068	77110821	199
4	82733551	82735002	199
4	82793323	82795465	199
4	83068103	83072329	199
4	89423985	89427568	199
4	90720692	90722083	199
4	94513025	94515815	199
4	94557160	94558807	199
4	94661397	94662845	199
4	95549078	95554921	199
4	100377373	100379524	199
4	100424933	100427270	199
4	108006571	108013913	199
4	112702283	112704021	199
4	122928632	122931464	199
5	756014	759151	199
5	4092911	4097018	199
5	6797988	6800842	199
5	9357421	9358903	199
5	19484185	19486536	199
5	21623220	21628247	199
5	29595788	29598166	199
5	46740186	46741911	199
5	47608418	47609811	199
5	64105409	64106759	199
5	64276513	64280458	199
5	67363235	67364790	199
5	68754786	68757411	199
5	76634062	76639924	199
5	88104019	88105731	199
6	411784	414791	199
6	13186421	13188570	199
6	13320218	13321982	199
6	18334474	18336070	199
6	19372417	19373758	199
6	28427391	28429117	199
6	34666430	34670601	199
6	39372843	39374139	199
6	42573608	42575277	199
6	42968836	42970733	199
6	43926918	43929157	199
6	45496697	45498325	199
6	48405685	48407507	199
6	51363303	51379193	199
6	52701367	52703322	199
6	52711258	52715100	199
6	54476365	54477336	199
6	54527903	54531084	199
6	57256960	57259577	199
6	62967325	62969404	199
6	69255509	69259545	199
6	72576175	72584372	199
6	75649913	75652341	199
6	77453146	77457211	199
6	78010422	78013033	199
6	83822437	83823876	199
6	89344763	89346472	199
6	92412290	92414601	199
6	95810407	95814017	199
6	110121328	110125634	199
6	160910188	160912150	199
7	13845628	13847364	199
7	15642047	15645084	199
7	20997798	21000598	199
7	24046254	24048732	199
7	28764022	28766095	199
7	36384688	36386349	199
7	46244229	46246300	199
7	46944327	46947633	199
7	56082236	56086221	199
7	86121670	86125493	199
7	97738230	97741075	199
7	100509037	100511698	199
7	104188661	104190344	199
7	117675116	117678051	199
8	1197729	1200929	199
8	30191067	30193107	199
8	30757283	30761089	199
8	52464921	52466714	199
8	56035189	56036707	199
8	56230243	56232491	199
8	67492435	67496924	199
8	82367320	82370966	199
8	97012671	97013988	199
8	130664517	130667409	199
8	138877385	138879603	199
9	2140764	2143171	199
9	3074833	3077677	199
9	3441553	3442630	199
9	9736219	9738694	199
9	12276847	12278290	199
9	56747691	56750854	199
9	60629248	60630671	199
9	70461700	70463203	199
9	72183313	72186135	199
9	91577715	91580127	199
9	104855698	104869018	199
9	107454527	107457537	199
9	107745269	107747620	199
9	109327474	109328327	199
9	109383981	109386174	199
9	114201595	114203370	199
9	124140992	124143895	199
9	124846413	124848658	199
9	126170894	126174140	199
9	133210081	133215667	199
10	723958	726458	199
10	13955060	13956851	199
10	17494567	17498444	199
10	24199538	24201130	199
10	38887705	38890317	199
10	41853106	41856018	199
10	48920185	48923245	199
10	53313241	53316524	199
10	65159380	65161895	199
10	66467411	66480046	199
10	66486299	66494006	199
11	1054883	1057063	199
11	5998876	6001302	199
11	8342659	8344189	199
11	8804717	8806487	199
11	14182305	14184858	199
11	17730531	17733428	199
11	25064201	25065684	199
11	25904925	25907080	199
11	64293994	64295274	199
11	67143873	67146325	199
11	67945374	67950903	199
11	68144064	68146576	199
12	5530673	5538796	199
12	11018462	11019713	199
12	18343574	18345497	199
12	20176131	20177475	199
12	20613362	20616170	199
12	20975626	20977794	199
12	25552335	25554724	199
12	36060207	36073922	199
12	38823666	38825987	199
12	42929066	42947205	199
12	43304977	43306288	199
12	47642717	47646071	199
12	51547871	51549109	199
12	51767086	51769143	199
12	52421597	52436827	199
12	52851599	52858399	199
12	60879815	60881830	199
13	6904277	6906854	199
13	12685266	12686566	199
13	19274765	19277320	199
13	24694311	24696043	199
13	30600754	30603214	199
13	31052184	31054107	199
13	31307659	31309844	199
13	53808013	53810319	199
13	59710125	59712277	199
13	61300362	61307010	199
13	81749104	81751799	199
13	81749104	81751799	199
13	82547426	82549616	199
13	83173591	83175671	199
13	96642752	96644552	199
13	100251870	100254491	199
13	100441217	100444460	199
13	106557808	106560022	199
13	108659613	108662156	199
13	110587350	110590941	199
13	124603121	124605099	199
13	132693178	132695666	199
13	139729557	139731480	199
13	140757723	140759991	199
13	167801212	167804551	199
13	190967293	190969567	199
13	195394814	195397708	199
14	7388446	7391484	199
14	10465731	10472984	199
14	14974276	14983946	199
14	30084000	30085836	199
14	30498068	30499611	199
14	31788675	31790255	199
14	35662619	35663915	199
14	39326189	39328280	199
14	45248645	45251423	199
14	48203375	48205875	199
14	48876189	48877240	199
14	50756176	50759897	199
14	55900163	55901765	199
14	56087544	56088424	199
14	56621781	56628225	199
14	61628862	61630493	199
14	66276060	66279307	199
14	71826878	71829057	199
14	72417452	72425385	199
14	75094727	75122674	199
14	81832760	81839260	199
14	89307100	89313879	199
14	90724986	90727462	199
14	103276878	103279911	199
14	103530016	103531809	199
14	109124807	109126155	199
14	111350573	111352679	199
14	112069369	112071068	199
14	113453645	113455706	199
14	114849661	114851771	199
14	129756996	129759232	199
14	132523175	132523914	199
14	135362580	135364525	199
14	138930369	138933332	199
15	20102409	20107306	199
15	25067040	25069140	199
15	45630650	45636645	199
15	45762071	45765141	199
15	65430639	65432818	199
15	74756578	74758634	199
15	80252725	80254568	199
15	81093284	81095040	199
15	84155304	84157451	199
15	88586730	88588592	199
15	96310346	96317251	199
15	101389479	101392354	199
15	110360573	110367080	199
15	134620281	134624790	199
15	137636304	137638266	199
16	5878703	5880333	199
16	30169629	30170712	199
16	39769664	39771687	199
16	50399678	50400366	199
16	51467001	51472170	199
16	51496768	51503555	199
16	69120535	69122246	199
16	71588036	71589572	199
17	15749461	15751641	199
17	22634831	22636167	199
17	26117963	26121400	199
17	26759149	26761119	199
17	28068998	28071622	199
17	35391446	35415851	199
17	38995732	38998312	199
17	47386334	47389441	199
17	48817122	48818375	199
17	51512245	51517433	199
17	58594425	58596422	199
18	1794794	1796282	199
18	6965524	6967157	199
18	10331273	10334861	199
18	14090929	14097199	199
18	33219147	33222583	199
18	37707324	37709180	199
18	45474039	45478287	199
X	12223386	12225707	199
X	59308240	59309822	199
X	82980147	82981224	199
X	88404054	88404794	199
X	106707543	106709129	199
1	66454130	66455159	200
1	130752538	130753941	200
1	272169886	272170848	200
2	151726202	151728469	200
3	46991856	46994967	200
3	110471899	110476205	200
3	111918541	111921889	200
4	64953363	64956526	200
5	64377778	64382289	200
6	141958820	141960529	200
7	117362587	117365971	200
8	135842538	135846831	200
9	21758425	21763878	200
9	55536683	55540749	200
10	40738812	40744832	200
10	50309409	50311981	200
10	54672944	54677679	200
11	21927724	21930770	200
12	758805	767260	200
15	19970792	19972791	200
15	65430639	65432818	200
16	44145300	44147800	200
17	22356691	22358431	200
1	12296718	12299103	201
1	108923317	108925068	201
2	151671322	151672911	201
4	3060401	3062114	201
4	64953363	64956526	201
5	44557732	44559419	201
6	50568338	50570271	201
6	59771685	59776509	201
6	149984165	149985899	201
7	52882644	52883431	201
13	61571314	61573085	201
14	45966742	45968555	201
15	112722650	112724184	201
1	197308565	197310188	202
2	5783068	5785385	202
2	142360125	142362038	202
3	26382757	26383776	202
6	7188481	7190067	202
6	37590066	37593196	202
8	40843947	40847383	202
9	8839728	8841343	202
9	39368495	39370180	202
9	41946520	41948675	202
11	79022386	79027994	202
12	20034503	20036654	202
13	66020125	66022738	202
13	132605240	132608043	202
13	162476735	162479304	202
15	85604919	85605968	202
16	53690607	53700488	202
1	253123350	253125236	203
1	261254800	261257625	203
1	268115750	268117291	203
2	52271157	52272973	203
2	73061865	73064436	203
2	133575400	133578169	203
2	137622390	137624829	203
3	34054581	34055638	203
3	125350272	125355101	203
6	89117396	89120155	203
7	50117732	50119380	203
8	5889850	5891633	203
8	30114505	30116129	203
8	96854823	96856750	203
8	135430180	135433153	203
9	81836768	81839161	203
10	30974205	30977578	203
11	21927724	21930770	203
13	26285635	26286829	203
13	34677978	34680783	203
14	48416893	48419382	203
14	59190667	59193408	203
14	101511978	101513478	203
14	102891130	102892544	203
14	111166261	111167968	203
1	56066536	56070871	204
1	159019774	159024484	204
1	187384013	187385057	204
2	11929360	11931437	204
2	49241904	49244109	204
2	72949901	72951699	204
2	135343359	135347359	204
3	8355438	8361824	204
6	13010960	13013392	204
6	79006370	79009031	204
6	159853958	159855674	204
7	29678892	29682124	204
11	7198709	7201857	204
11	78597539	78602233	204
12	37534518	37537220	204
15	56437321	56439075	204
15	60438480	60441495	204
16	66114749	66115745	204
1	128083222	128085258	205
7	36410594	36411777	205
8	108914028	108917638	205
8	118250404	118252066	205
10	13415248	13417793	205
11	24962855	24965418	205
14	42124564	42130847	205
14	59190667	59193408	205
17	32824970	32826960	205
1	165192020	165193473	206
1	183861339	183864116	206
1	230544649	230545761	206
2	49856518	49859178	206
3	111779812	111783046	206
5	88104019	88105731	206
6	14881104	14884145	206
7	57186139	57188226	206
7	91412580	91414753	206
8	35218091	35220151	206
8	103926728	103928011	206
9	102346916	102348726	206
12	35392550	35394116	206
13	127932880	127934950	206
13	192655409	192658943	206
17	26480056	26482324	206
18	50533333	50534835	206
1	17136455	17139314	207
1	128640279	128642926	207
2	80192689	80195446	207
3	73027466	73030125	207
5	48553446	48556069	207
5	59829540	59832350	207
5	63855286	63860064	207
6	34757827	34759660	207
12	51561571	51563926	207
13	14041593	14043884	207
13	123057742	123059213	207
16	27955335	27957322	207
18	17668430	17671219	207
2	76503137	76524778	208
3	3622048	3623493	208
3	17635162	17635963	208
6	60638748	60640419	208
14	24316761	24318462	208
14	29386689	29388503	208
14	124399279	124402738	208
17	34581515	34583886	208
1	268893789	268894881	209
2	10121168	10122417	209
2	42363165	42365583	209
2	68676715	68678569	209
2	68715825	68717017	209
2	90349584	90352720	209
2	103253715	103257476	209
2	106555337	106556215	209
9	32944589	32947630	209
9	43388444	43392518	209
9	120809379	120811268	209
11	33256791	33260512	209
12	38072751	38075663	209
13	73900074	73901580	209
14	31673213	31676276	209
2	133950360	133952979	210
3	18467218	18468573	210
3	22585869	22587553	210
4	68119254	68120850	210
5	9712982	9718699	210
5	15643476	15646940	210
6	19153057	19155832	210
6	74798427	74799635	210
6	147393177	147397504	210
10	47140007	47142949	210
12	23434303	23436770	210
12	52867561	52870604	210
13	24573888	24576227	210
13	90033003	90036861	210
X	60426655	60428303	210
1	207251631	207253192	211
2	15934782	15936699	211
2	25908404	25913052	211
2	51669806	51672899	211
2	72702435	72704435	211
2	116900083	116902071	211
4	50508009	50510048	211
4	65020780	65021523	211
5	18408323	18411476	211
6	91746571	91748752	211
6	97358617	97360285	211
8	20455201	20458232	211
8	125258557	125260225	211
10	39797588	39798952	211
10	48939492	48941156	211
1	166124809	166128955	212
1	230068547	230070647	212
2	16771448	16773649	212
2	25420827	25424371	212
3	17800623	17802509	212
3	68116134	68118065	212
3	113757583	113759557	212
4	89310030	89312708	212
4	106057364	106059440	212
7	31791175	31797667	212
10	43513815	43521184	212
11	67143873	67146325	212
13	21876849	21879613	212
13	138018404	138020364	212
14	48876189	48877240	212
14	50082374	50084908	212
15	104098058	104099602	212
1	100573491	100575251	213
1	219811121	219817190	213
2	78874037	78877410	213
4	107118405	107121139	213
5	18673363	18675315	213
6	4479502	4481015	213
6	53040563	53047160	213
6	86131082	86132163	213
9	5502074	5504370	213
9	75270361	75275014	213
12	36332512	36335402	213
12	42528610	42529921	213
13	182225893	182228651	213
14	12195936	12198894	213
14	15717459	15720233	213
14	45924211	45925594	213
17	43408744	43414994	213
17	62753751	62754484	213
1	121374979	121376907	214
2	15066081	15068527	214
2	71364918	71365868	214
3	93371087	93374798	214
6	75324561	75327549	214
11	49028389	49032581	214
12	6239813	6242473	214
14	73086714	73089234	214
14	113706710	113708357	214
15	54443651	54446011	214
17	36390052	36392025	214
2	9063670	9067477	215
5	27125460	27127381	215
6	12195022	12196589	215
6	48935851	48949630	215
6	84917884	84921323	215
6	115785211	115787703	215
7	24219028	24233933	215
8	1625563	1628883	215
8	133861303	133863553	215
11	6603580	6605273	215
15	16412823	16415482	215
15	139536271	139538789	215
17	41478668	41479895	215
1	194438570	194440701	216
2	9118717	9121303	216
3	124192787	124197505	216
6	86137611	86140577	216
6	127959803	127961104	216
7	30665695	30667992	216
7	75088735	75090579	216
12	4481160	4490459	216
14	10194217	10197859	216
17	43961469	43964365	216
1	28968429	28969524	217
1	54400197	54401419	217
1	222523886	222526102	217
2	138287286	138289628	217
3	41204855	41210794	217
3	72544095	72545367	217
3	100886247	100889276	217
5	15672979	15675943	217
5	80529543	80532681	217
7	38212250	38218121	217
7	120753416	120756029	217
13	95743531	95745210	217
14	76699549	76702756	217
14	90577488	90583443	217
15	101371636	101375520	217
15	130937318	130940730	217
15	140263994	140265983	217
17	33409896	33412987	217
18	19254729	19256226	217
1	188334475	188337529	218
2	66290540	66291789	218
2	102588722	102592699	218
5	26963874	26966492	218
5	32989122	32990476	218
7	2444956	2447144	218
8	112761552	112763893	218
9	27277120	27279248	218
9	64047049	64055250	218
11	25643399	25644143	218
14	51111481	51113112	218
14	66918778	66921636	218
15	48660348	48663641	218
15	120589210	120591946	218
1	63638510	63639595	219
3	42860157	42864274	219
12	5626537	5630983	219
13	144854617	144855327	219
14	112734161	112736129	219
15	111371775	111373122	219
16	3562856	3566217	219
17	35291155	35292510	219
1	119757407	119760194	220
1	235790150	235791523	220
2	139780861	139783796	220
2	144925806	144932128	220
3	125350272	125355101	220
4	34427526	34433394	220
4	117618600	117620168	220
6	48916065	48921373	220
6	153882127	153883011	220
10	666663	668291	220
11	18296339	18299062	220
13	23864511	23865956	220
13	68545622	68547588	220
14	39884981	39887154	220
14	47542937	47545538	220
14	55449514	55452734	220
15	95512553	95515828	220
1	72310163	72315639	221
2	76677690	76692795	221
5	7141065	7145733	221
6	81629618	81630871	221
7	47640295	47642265	221
9	83417702	83422204	221
13	18556852	18558862	221
13	34681939	34683273	221
13	133380541	133383566	221
14	31944370	31947284	221
14	91104059	91106164	221
15	95247395	95250661	221
16	20522508	20524697	221
18	51923759	51925006	221
X	62186877	62190017	221
1	159529385	159532638	222
2	27768656	27770502	222
2	61036906	61039992	222
3	26759619	26762625	222
4	87742049	87743969	222
6	1545289	1547315	222
6	77706638	77708797	222
6	80033782	80036922	222
7	25070430	25074067	222
12	52416299	52420257	222
14	6638992	6641165	222
14	103870304	103872742	222
16	34857865	34861402	222
18	54282112	54284500	222
18	54613699	54617264	222
1	122633600	122634900	223
1	163220333	163222962	223
2	49228377	49232056	223
2	50810842	50813091	223
2	74454513	74456866	223
2	79728299	79730959	223
2	90261289	90265071	223
2	120482826	120484185	223
3	11215403	11220934	223
3	44147362	44149529	223
3	72792606	72797565	223
6	14714673	14716275	223
6	32069822	32072926	223
6	37942686	37945054	223
6	86091291	86093649	223
7	60692364	60694365	223
7	103759744	103761117	223
8	20254330	20255592	223
10	32180052	32181512	223
10	38970130	38971760	223
12	47684126	47686407	223
12	51968887	51972348	223
13	71559828	71562312	223
13	108435220	108436815	223
13	137249661	137251187	223
13	138150251	138153163	223
16	51208949	51212229	223
16	52003159	52008872	223
2	73885007	73889953	224
3	1719150	1724372	224
3	4642930	4644878	224
3	44326712	44328750	224
4	95743557	95750893	224
4	112702283	112704021	224
5	16013674	16017408	224
6	13445069	13457181	224
6	103963136	103966200	224
7	77718731	77720665	224
12	5203936	5208700	224
13	32444173	32446300	224
14	51468148	51470718	224
14	56540061	56557333	224
17	26810554	26812166	224
1	203681961	203686507	225
3	110471899	110476205	225
6	106787168	106789604	225
9	74276054	74278039	225
10	44957334	44958479	225
13	100924311	100925593	225
13	151428281	151432798	225
14	28724662	28728142	225
14	30022656	30024670	225
14	110804135	110808386	225
17	14174474	14181189	225
17	62594015	62596320	225
1	169800735	169803154	226
2	140329826	140332672	226
3	42632329	42636363	226
3	125750969	125753158	226
4	20642583	20649071	226
4	38913736	38915139	226
4	93922629	93932759	226
5	46822574	46825161	226
6	149746982	149749438	226
6	160297635	160300484	226
6	170761729	170763833	226
7	64807733	64809003	226
8	77237292	77238644	226
9	71348275	71351350	226
9	131425350	131427884	226
13	19509363	19511564	226
14	15018296	15036222	226
14	54742090	54743120	226
8	3795270	3798981	227
8	56082501	56085332	227
9	122579260	122580668	227
13	71885227	71887763	227
13	122186944	122188348	227
14	77784714	77788950	227
15	76006097	76007899	227
15	110373806	110380871	227
16	26707150	26708355	227
1	194503288	194506188	228
2	8917765	8921032	228
5	17397879	17403245	228
5	66320446	66322020	228
6	43815057	43816266	228
9	104906670	104916252	228
9	123759277	123764246	228
14	94094030	94095344	228
16	47409140	47411180	228
1	96728363	96729907	229
1	124040860	124044563	229
4	46910817	46913205	229
4	109784605	109788131	229
5	21494621	21497538	229
6	67431217	67436713	229
6	69834815	69839199	229
7	113147036	113150324	229
9	103178885	103181482	229
14	92278894	92280146	229
14	99927036	99933521	229
15	76107440	76108991	229
17	38339318	38343182	229
1	106897437	106898926	230
1	107581534	107584027	230
1	143535998	143542519	230
1	179455865	179457648	230
2	87141570	87143829	230
6	32012509	32015550	230
6	86091291	86093649	230
12	35572236	35575741	230
12	46460983	46463480	230
14	135041184	135042862	230
17	27806550	27808337	230
1	52434138	52436626	231
1	261405238	261411661	231
2	6900733	6904516	231
2	80366718	80368530	231
3	96315514	96317383	231
3	96871265	96872941	231
5	7621225	7623665	231
6	52876518	52877242	231
7	54655105	54656807	231
7	56539019	56541211	231
8	104559720	104561136	231
12	27003713	27006275	231
14	47983498	47985409	231
X	54961685	54963836	231
2	5253814	5258298	232
2	11876257	11877432	232
2	71271738	71272562	232
2	87497036	87499777	232
3	8154458	8156731	232
3	93852512	93855033	232
3	94253448	94254131	232
3	117771673	117780531	232
4	16099791	16104250	232
4	119253710	119257671	232
5	30484049	30485929	232
6	18644098	18645822	232
6	165618925	165621782	232
9	122632926	122636281	232
11	570287	572886	232
12	47853185	47861964	232
13	106893404	106896294	232
14	6359475	6362004	232
1	74653469	74664958	233
2	69412300	69415885	233
2	77321082	77326344	233
2	143206669	143210980	233
3	6503652	6505530	233
5	5070211	5072348	233
5	46573040	46575379	233
5	65788158	65789412	233
6	57963509	57966226	233
13	131132186	131138005	233
14	124831434	124836072	233
15	119997047	120001957	233
1	108762348	108763728	234
1	230870619	230873070	234
2	4193373	4195181	234
3	58206333	58208103	234
4	83308478	83310632	234
6	79006370	79009031	234
8	4029573	4032381	234
8	67647258	67649315	234
8	121656445	121658741	234
11	79083429	79084912	234
13	158727957	158730064	234
15	101371636	101375520	234
17	25997868	25999803	234
17	39062940	39066766	234
2	6749475	6774138	235
2	80246187	80249298	235
3	7981623	7983175	235
3	78028968	78032646	235
3	103249735	103250781	235
3	111918541	111921889	235
5	18929258	18931138	235
6	49148570	49149008	235
6	54680585	54689468	235
7	52789473	52796085	235
7	65684405	65686845	235
9	99250806	99252659	235
13	189288509	189291384	235
16	79861522	79863462	235
1	57061009	57063821	236
1	255150656	255153404	236
5	9320728	9323871	236
7	52555656	52558872	236
7	76431325	76432657	236
7	100119748	100140203	236
12	3308244	3310709	236
13	34410170	34412951	236
14	87587319	87589964	236
1	159316654	159318581	237
1	248447118	248449908	237
2	1625460	1638696	237
2	60175105	60177590	237
2	75096792	75099528	237
4	99337725	99357315	237
4	129720887	129722543	237
5	30526008	30528104	237
6	28463809	28470917	237
7	121236109	121238798	237
8	56193495	56194977	237
10	24109789	24111214	237
10	28993418	28997238	237
10	30974205	30977578	237
10	49119452	49120956	237
12	3986347	3989671	237
12	53779460	53781992	237
13	96388565	96390740	237
15	54381162	54384994	237
15	77563431	77565536	237
15	104655749	104657456	237
15	131491361	131495122	237
17	47721792	47725686	237
X	51230720	51231727	237
2	135305378	135307305	238
4	84174567	84175605	238
4	93495074	93496842	238
5	4217767	4220344	238
7	1655144	1658516	238
7	19585231	19587233	238
7	49816549	49821078	238
8	29189108	29191514	238
11	75544294	75545525	238
13	65947576	65950102	238
14	47265056	47271236	238
14	76635345	76638348	238
14	87926204	87932561	238
15	121264246	121266728	238
17	43961469	43964365	238
18	50564361	50567622	238
3	77854429	77858908	239
3	118143173	118146359	239
4	95937964	95946064	239
4	111292473	111294044	239
5	100427233	100429205	239
6	32040729	32045820	239
6	48304261	48305908	239
6	49571065	49574807	239
6	108449076	108451897	239
6	164207276	164208508	239
6	169220763	169222503	239
8	86034594	86036487	239
9	6674811	6692838	239
10	24901477	24902636	239
14	22744582	22746720	239
14	76590022	76595154	239
16	25802228	25805358	239
18	9333543	9334820	239
1	180933402	180934815	240
1	267925114	267926259	240
2	13284470	13285755	240
2	40899354	40901298	240
2	77329396	77332175	240
3	9990962	9996643	240
4	98332438	98335118	240
6	147428028	147431493	240
6	153755164	153757341	240
9	64031438	64036310	240
13	23018978	23021978	240
14	34556389	34559910	240
1	109009795	109012181	241
1	129941666	129943366	241
1	149579008	149584974	241
1	161982718	161985280	241
1	231081053	231082984	241
2	3193391	3194987	241
4	96113404	96115642	241
6	74807772	74811643	241
6	79808441	79811600	241
6	164882296	164891444	241
12	1218503	1221036	241
13	82936140	82938252	241
14	39605828	39608198	241
15	47045329	47047355	241
4	34265100	34273709	242
4	89323949	89328694	242
4	109271213	109272717	242
4	130701115	130704000	242
6	118875816	118881000	242
7	25247292	25248396	242
9	60784775	60787384	242
10	16188506	16192874	242
13	98591312	98593435	242
17	41507183	41508697	242
18	44261905	44265577	242
1	115054687	115057206	243
9	116401784	116403529	243
12	51718013	51719612	243
13	71592933	71597234	243
14	65544957	65562720	243
14	99884024	99886430	243
2	76428298	76430137	244
3	10269541	10272495	244
3	126794534	126796966	244
6	20370967	20373557	244
6	165845960	165849690	244
7	117585197	117587716	244
9	53008272	53009594	244
10	64837089	64840575	244
13	39088154	39090925	244
16	44414728	44417394	244
17	19624817	19631397	244
1	7446502	7448163	245
1	270189826	270191399	245
5	6928171	6930586	245
9	90336054	90338254	245
11	18128307	18132870	245
13	72649543	72651579	245
14	22608014	22609019	245
15	56001925	56006750	245
16	5712857	5714598	245
16	64719415	64722931	245
17	46932985	46934452	245
1	106966828	106968477	246
2	48728408	48729701	246
3	22695418	22698933	246
3	113043418	113046170	246
4	41985028	41986305	246
4	98802562	98806918	246
6	71251945	71254148	246
7	112160074	112163058	246
8	137491347	137492175	246
10	25427656	25429346	246
12	53180110	53182323	246
13	25163421	25165907	246
13	206256062	206258847	246
15	64889921	64892909	246
2	73331641	73336233	247
3	762598	764439	247
4	79685778	79688291	247
4	90391639	90394684	247
7	97196996	97198821	247
7	104281821	104283235	247
8	12967143	12969806	247
9	107641607	107643028	247
11	21871531	21873331	247
12	44891893	44894365	247
12	46392371	46393868	247
12	54543311	54544168	247
13	79674498	79675699	247
13	145360337	145368102	247
14	46622933	46624557	247
15	45762071	45765141	247
15	45930973	45934448	247
17	37446418	37449949	247
1	92420348	92424087	248
1	126236034	126238137	248
3	68642597	68644044	248
4	93974588	93977571	248
4	101520227	101523209	248
5	21623220	21628247	248
5	46022339	46023911	248
7	51929344	51930684	248
7	59447511	59453881	248
13	110727536	110730615	248
13	165910213	165911486	248
14	108998954	109000075	248
15	109450961	109453844	248
16	47475917	47479047	248
17	56940690	56942387	248
18	8957260	8959371	248
18	48753975	48756918	248
1	131241003	131242538	249
2	74626178	74628250	249
2	136731616	136736556	249
4	122342992	122344516	249
5	57748891	57750955	249
8	110088521	110089853	249
9	536600	538192	249
9	20288272	20289672	249
9	45309356	45314099	249
12	50727645	50729786	249
13	205312715	205314464	249
14	13335004	13339141	249
1	111374678	111377157	250
1	186529151	186531389	250
1	268461790	268468673	250
2	5355562	5359616	250
3	41570523	41573374	250
3	76899845	76901895	250
4	32700749	32703042	250
6	6254094	6255368	250
9	72359943	72361556	250
11	16046840	16049430	250
12	53369912	53376738	250
14	41356913	41358212	250
17	43708974	43712961	250
1	21800967	21802396	251
3	114604160	114606699	251
4	106563400	106570189	251
5	11365507	11368948	251
5	18265260	18267697	251
6	14480247	14481367	251
6	50440226	50443075	251
6	63443341	63447580	251
6	165823188	165826416	251
7	32999760	33001764	251
7	75179964	75182562	251
9	28405849	28408320	251
12	5563747	5566453	251
13	32707017	32726962	251
1	179711532	179715560	252
1	228140736	228145175	252
2	84379222	84381319	252
3	45198692	45201796	252
4	110694022	110696434	252
8	10990629	10991766	252
9	8211393	8212673	252
9	41480004	41481814	252
12	19786089	19789961	252
13	3991611	3994595	252
13	159133478	159136708	252
14	47334476	47336199	252
17	11817153	11819167	252
18	44984775	44986541	252
1	130515852	130517296	253
2	132207	133421	253
2	14982631	14983991	253
2	61268578	61275065	253
3	54774635	54776548	253
6	17605241	17606782	253
6	51962875	51965531	253
6	165823188	165826416	253
9	100270578	100272922	253
9	130834437	130837527	253
13	199996481	200000313	253
15	105054409	105056284	253
18	54427337	54432000	253
1	43171355	43173521	254
2	141336062	141337776	254
4	3025443	3031885	254
4	98560020	98580212	254
7	53316954	53318197	254
7	88571775	88579570	254
8	71982872	71985348	254
9	108630629	108632221	254
12	23765648	23767324	254
13	24030139	24032238	254
14	38698674	38699776	254
1	26481286	26489734	255
2	26531750	26534689	255
2	143123427	143125839	255
4	67464904	67467202	255
5	47695129	47700210	255
7	114234555	114238754	255
8	43744000	43746947	255
9	19608171	19609607	255
9	130906944	130911508	255
10	23037463	23039872	255
10	46898492	46900775	255
13	18993998	18996635	255
14	109007335	109010553	255
15	78097980	78098895	255
16	68708451	68712053	255
18	18819507	18824270	255
18	19872479	19876655	255
1	239491288	239493818	256
2	74745797	74748620	256
2	136474498	136476846	256
5	43042596	43043906	256
6	18900033	18904224	256
6	49357208	49359745	256
7	40895789	40897338	256
7	75776327	75779333	256
7	109960386	109962129	256
9	78217744	78219793	256
13	201198025	201200171	256
14	114754408	114759311	256
1	113257622	113259300	257
4	34644675	34648780	257
5	88292761	88293822	257
6	28819742	28822058	257
6	166644024	166646678	257
9	6661201	6664792	257
9	57016665	57018957	257
10	52600525	52602184	257
11	25492730	25498066	257
12	39925832	39927527	257
X	36987921	36991805	257
2	126270721	126272831	258
3	16160137	16162727	258
6	96361917	96364234	258
7	23161953	23167295	258
9	102778528	102786722	258
10	56156486	56159662	258
11	22517727	22520376	258
12	31722108	31723816	258
13	50476039	50478122	258
13	97893775	97894708	258
14	34319823	34324059	258
15	15922892	15924598	258
15	132353718	132360863	258
2	98370675	98372310	259
4	95894110	95895662	259
7	13932590	13936365	259
7	75949261	75952689	259
7	77697843	77699778	259
12	3641994	3646650	259
14	61664728	61668874	259
15	3524877	3526753	259
15	60438480	60441495	259
1	201591045	201592861	260
1	216492979	216495732	260
2	45604027	45605928	260
2	113773201	113775946	260
7	96998782	97000501	260
9	88784982	88785896	260
12	20975626	20977794	260
12	52103697	52106269	260
13	90817842	90819426	260
14	12195936	12198894	260
14	129113401	129115033	260
1	252452618	252454667	261
2	66260231	66264249	261
3	87108234	87110597	261
4	99224807	99226395	261
5	27250772	27254269	261
5	63003979	63009525	261
6	27683634	27685995	261
7	31222502	31228197	261
8	20452550	20453880	261
8	131471937	131473784	261
14	105169138	105170291	261
18	40440817	40442336	261
2	51274923	51277580	262
2	75145782	75147514	262
3	7179294	7181501	262
4	108635213	108637058	262
5	22396766	22402819	262
6	49710396	49712192	262
7	27205824	27207452	262
12	18237446	18238729	262
13	10755925	10759382	262
13	71644938	71648163	262
15	135003232	135005818	262
17	39704301	39708377	262
1	217203496	217205630	263
2	62249563	62252608	263
2	81658305	81659625	263
2	90261289	90265071	263
4	3060401	3062114	263
6	142515685	142517466	263
9	72443674	72445376	263
12	14367806	14370488	263
12	18141794	18144773	263
12	24302096	24313315	263
14	103093944	103096613	263
1	31184448	31186220	264
1	179476794	179479602	264
1	267772168	267773554	264
2	60375671	60381602	264
6	75302618	75307097	264
6	81717753	81725021	264
9	27810982	27813960	264
9	139134209	139136564	264
12	17983601	17990979	264
14	129509690	129511874	264
15	120755662	120757565	264
16	37304330	37305914	264
17	33869007	33870339	264
1	45169038	45172301	265
1	216691104	216694192	265
4	42162444	42163477	265
5	7513714	7516221	265
6	81072904	81074322	265
6	129054707	129056218	265
7	31160115	31162288	265
10	32100519	32102035	265
10	68620297	68622691	265
13	100251870	100254491	265
14	12204308	12206384	265
14	138933630	138935934	265
17	47680753	47687535	265
1	57363078	57366274	266
3	80033006	80035454	266
5	27250772	27254269	266
6	17432793	17436991	266
6	45510169	45513400	266
9	39665961	39666936	266
11	24969680	24971978	266
11	45075103	45075840	266
13	67417246	67419138	266
13	131475095	131478334	266
14	115063648	115065564	266
15	46503186	46503869	266
18	38180778	38184906	266
3	67610445	67611752	267
5	79304168	79306408	267
9	133186872	133189999	267
12	61305454	61310006	267
13	71916915	71918686	267
14	73295662	73297166	267
14	108885150	108888765	267
18	4990160	4993654	267
18	40397631	40398827	267
1	16138360	16140244	268
2	59408699	59411049	268
2	101919191	101921034	268
4	80931619	80933230	268
9	33001655	33006823	268
12	56401962	56402338	268
13	82547426	82549616	268
13	133559686	133561446	268
15	47597388	47602718	268
17	37568828	37571260	268
18	2896075	2900414	268
18	19140999	19143601	268
18	44908784	44910946	268
2	78914495	78917193	269
4	92963545	92966351	269
4	127450495	127452625	269
5	18877358	18880393	269
6	167640890	167643199	269
9	67267181	67269474	269
12	59171998	59175109	269
13	31989941	31992934	269
13	77862621	77865759	269
14	38542184	38543613	269
17	26377036	26382286	269
1	44238429	44240553	270
1	92286009	92287706	270
1	154918542	154920617	270
1	253090997	253094130	270
1	269374241	269376056	270
2	82099647	82102962	270
3	72618561	72620633	270
5	9647379	9651063	270
5	33104923	33107128	270
8	114251220	114254152	270
10	68527229	68530276	270
11	17847914	17850022	270
X	12223386	12225707	270
3	44432181	44435091	271
7	19501043	19503370	271
11	8883826	8885959	271
12	53545964	53547913	271
13	89332156	89333985	271
15	66648485	66651159	271
15	120296158	120303751	271
2	27212910	27214238	272
3	47703606	47705611	272
4	98060952	98063896	272
6	28194368	28197665	272
9	116291028	116293247	272
13	26963171	26965369	272
13	157490110	157492041	272
15	95644327	95650478	272
1	122138069	122141377	273
4	68119254	68120850	273
5	9687455	9696922	273
5	63855286	63860064	273
6	29366055	29368258	273
9	126345761	126349189	273
10	25706227	25709648	273
13	29842775	29851177	273
13	121812620	121814227	273
13	134717850	134720379	273
15	67315226	67322899	273
5	61162419	61163509	274
8	86689622	86691239	274
9	66314274	66316930	274
9	120858894	120861728	274
12	6115341	6117862	274
16	68358427	68360289	274
1	112343360	112345116	275
1	128807476	128810389	275
3	92812663	92815057	275
4	90213498	90217141	275
5	21698166	21701643	275
5	90131072	90133110	275
7	60877615	60879195	275
7	100390386	100393229	275
13	64932535	64935909	275
15	140255376	140256913	275
17	39092134	39095449	275
4	82793323	82795465	276
5	35756615	35758537	276
5	42298396	42300629	276
7	28811075	28812885	276
9	66248979	66250292	276
13	153479717	153483733	276
1	163857009	163860435	277
11	60731317	60733532	277
14	49332420	49334496	277
14	61046994	61049444	277
14	128747185	128749796	277
15	43787725	43788882	277
X	123596	126707	277
1	7589105	7591474	278
1	82160543	82163026	278
2	123001994	123005405	278
5	21517908	21519878	278
5	23232933	23234919	278
6	84466773	84469268	278
7	68142552	68144823	278
12	45428301	45430512	278
13	3394757	3397595	278
14	2597509	2604650	278
16	27813638	27815555	278
16	36023847	36026007	278
17	32562241	32564900	278
1	268663140	268670187	279
3	59201449	59204205	279
5	90813321	90823321	279
6	3688841	3691903	279
6	67444670	67448350	279
7	48048854	48051337	279
7	87889017	87891720	279
8	110503068	110505506	279
10	57828065	57831789	279
15	91492611	91494408	279
1	19755541	19757533	280
2	4681331	4683480	280
3	26653342	26655368	280
3	44021721	44023806	280
3	49679884	49681879	280
7	64576214	64577255	280
9	112931116	112933067	280
9	126477621	126480694	280
12	22065119	22074592	280
13	72195226	72196765	280
13	77178893	77182744	280
1	186429233	186430839	281
2	140530694	140533180	281
4	56606981	56608546	281
6	19206515	19208104	281
6	75444901	75447247	281
8	83239673	83242224	281
10	50309409	50311981	281
12	20507002	20511483	281
12	39068478	39070459	281
13	100132323	100134037	281
13	124389965	124391712	281
15	106995716	106998549	281
15	112914764	112917501	281
2	44612460	44614915	282
3	1901574	1903431	282
3	10609226	10610909	282
3	55675722	55678049	282
3	127501178	127509468	282
5	18336759	18340237	282
5	73495976	73498207	282
6	83650571	83652169	282
18	18722181	18724723	282
1	25361715	25364685	283
1	103793450	103796997	283
1	107324461	107326838	283
3	58574267	58576192	283
6	47473001	47477118	283
8	47702159	47703823	283
10	12430882	12432490	283
14	45248645	45251423	283
18	10331273	10334861	283
X	30611503	30615534	283
2	9160816	9165046	284
3	113490339	113493052	284
4	93733068	93735225	284
5	63829017	63831560	284
6	54680585	54689468	284
6	96732378	96735765	284
9	77508272	77511043	284
9	124846413	124848658	284
11	4688116	4690585	284
11	19616111	19617494	284
12	24350358	24352455	284
14	104956546	104957726	284
18	23721183	23724970	284
18	36582881	36585692	284
1	50721238	50722571	285
1	180067842	180072185	285
3	3799508	3801664	285
6	31564191	31565463	285
7	48966817	48969095	285
9	37005776	37007196	285
12	43031585	43033577	285
13	35372843	35378153	285
1	108205391	108207416	286
3	46545679	46549030	286
5	16176247	16178292	286
6	164777500	164779273	286
8	95948534	95950627	286
9	117062469	117065347	286
9	125982162	125984856	286
12	44635121	44637105	286
13	32318399	32321215	286
17	31054955	31056960	286
1	127935937	127938656	287
2	141882599	141886336	287
6	144942049	144944074	287
7	90954784	90956896	287
10	17257987	17259354	287
10	40052513	40054207	287
13	160397162	160399172	287
15	87377431	87381538	287
1	7589105	7591474	288
1	229335870	229337654	288
8	81021981	81025558	288
10	29065171	29067454	288
13	133182110	133184039	288
14	10318182	10320566	288
3	7590800	7591544	289
4	107820709	107823604	289
6	88837753	88839725	289
6	101756054	101758935	289
10	65107659	65109806	289
11	68051150	68053985	289
14	28300217	28305215	289
14	129740909	129742962	289
15	94940238	94942371	289
17	31825976	31830017	289
1	120945086	120947119	290
2	66098767	66103540	290
3	16392932	16394576	290
13	197160533	197163147	290
3	53691613	53693642	291
9	20123202	20125823	291
9	51917832	51919878	291
12	23914277	23917534	291
1	225710378	225717096	292
1	234368387	234371279	292
2	59528782	59534124	292
12	47795191	47809990	292
13	200924631	200929146	292
15	29713323	29714822	292
15	100063829	100066663	292
11	22143916	22145724	293
13	120726965	120729396	293
14	104104838	104107232	293
14	110827493	110828734	293
17	61552398	61556155	293
X	125484731	125486329	293
1	108408460	108411732	294
1	112677155	112680811	294
2	74728084	74730583	294
5	37978295	37979511	294
5	68166545	68169027	294
7	75787966	75790507	294
8	96923713	96925850	294
11	77269406	77272689	294
12	52902264	52903605	294
13	121069508	121070900	294
14	113889287	113891142	294
17	31704110	31706480	294
X	84937204	84938018	294
1	123460834	123462985	295
1	184255594	184257777	295
2	65172331	65176904	295
3	101956300	101959152	295
4	103375682	103378480	295
9	135074508	135080200	295
11	49028389	49032581	295
1	268933174	268939252	296
3	24814735	24815612	296
3	77739381	77745783	296
4	95518336	95521309	296
7	99958079	99960473	296
14	73323311	73325983	296
2	97702421	97704467	297
3	111747111	111749087	297
10	57880922	57884332	297
2	119803390	119804940	298
5	80488278	80493520	298
6	109109102	109111067	298
6	115785211	115787703	298
6	160450192	160451979	298
6	165708214	165711894	298
7	58997907	58999494	298
13	2839608	2841688	298
6	58856671	58860304	299
6	92348239	92351275	299
10	68565404	68567204	299
12	44615485	44620882	299
14	45994929	45996812	299
14	75916952	75920179	299
3	41343096	41345962	300
5	4649040	4650174	300
6	48967443	48972963	300
6	49838312	49841700	300
6	54588957	54591689	300
15	7684187	7688259	300
15	76135065	76136876	300
16	47916726	47917807	300
1	43213449	43215742	301
3	101382332	101383412	301
5	3286405	3287727	301
7	40202834	40208251	301
13	32027488	32031417	301
13	146191243	146194691	301
14	37580689	37587259	301
17	38636689	38638696	301
1	7650086	7652315	302
2	77245180	77250714	302
12	3354446	3359456	302
1	202258031	202259505	303
3	58094361	58098271	303
7	61112942	61114675	303
8	118201350	118206290	303
8	122006453	122008925	303
9	9774665	9786797	303
9	12063614	12066095	303
10	13711467	13712513	303
10	39875330	39875633	303
12	11677411	11684608	303
12	20795594	20798887	303
12	45596351	45598694	303
13	1434805	1436945	303
14	76510580	76512707	303
3	42632329	42636363	304
9	45862664	45864913	304
14	46013904	46017632	304
15	101208860	101211883	304
3	56631198	56633322	305
6	145678709	145681589	305
7	100174570	100183406	305
14	903366	906324	305
14	76863497	76864832	305
3	57382706	57387766	306
6	128029896	128031346	306
9	102561435	102564966	306
13	71850912	71853298	306
13	202941900	202944704	306
1	50780988	50782398	307
2	9525647	9530630	307
5	7775556	7778287	307
5	16372608	16375366	307
7	83078793	83086711	307
10	46819492	46820689	307
12	59158069	59159779	307
1	64459164	64461316	308
4	36208016	36211537	308
7	104188661	104190344	308
8	99781906	99785337	308
15	110703597	110708092	308
15	132315767	132322792	308
3	54929710	54932702	309
6	85641751	85643895	309
4	78095999	78100772	310
6	165266998	165269542	310
7	2378249	2380855	310
13	35995860	35997582	310
14	30264352	30265987	310
15	140022583	140025850	310
16	51447934	51466768	310
1	268529801	268535458	311
8	87772441	87776170	311
9	71894837	71896694	311
14	73166336	73168471	311
4	125109003	125114144	312
6	14996982	14998931	312
12	60527646	60531587	312
13	201007492	201013430	312
16	71298742	71300467	312
1	189247850	189250300	313
2	77657021	77663354	313
2	81612509	81614398	313
3	38752396	38754428	313
5	13579429	13581274	313
7	59766103	59770827	313
7	93393307	93394543	313
8	121408515	121411575	313
9	75257840	75261290	313
12	14034744	14036537	313
12	18426171	18427126	313
13	27005403	27007173	313
15	106515451	106517603	313
8	120562877	120565129	314
14	10382151	10385844	314
14	72209786	72211961	314
14	132531695	132532967	314
16	46431813	46438833	314
X	20145842	20147610	314
1	113288398	113291036	315
1	228090357	228093004	315
2	32983597	32984785	315
3	72323523	72328481	315
6	34787318	34789218	315
10	25201691	25203341	315
13	45526286	45527346	315
15	78607876	78609831	315
15	81804008	81806317	315
18	42650431	42653287	315
1	190676995	190678510	316
5	66066172	66067937	316
8	116249176	116250810	316
10	55698703	55701544	316
11	1404395	1406849	316
12	2284638	2287063	316
14	124519920	124521641	316
14	134252649	134255857	316
1	90649705	90652925	317
2	5055650	5063081	317
2	39032158	39033694	317
6	52924570	52939151	317
6	84238031	84239449	317
7	112143604	112148571	317
11	19372170	19380948	317
13	14783814	14786399	317
3	77292437	77295752	318
6	137574194	137577052	318
8	119427630	119431494	318
12	20405060	20409949	318
13	158325626	158327776	318
16	6144004	6146440	318
2	74044125	74045788	319
3	7571241	7572655	319
7	96796791	96800206	319
9	222702	225325	319
13	196923947	196928319	319
15	44885717	44887997	319
15	132172629	132175952	319
3	40254912	40257490	320
3	58353624	58355971	320
3	126428663	126431690	320
6	82852750	82855049	320
8	1037467	1040128	320
12	20041598	20042715	320
18	563840	567303	320
2	52309034	52312957	321
2	61268578	61275065	321
6	56610167	56611963	321
6	69934261	69936146	321
6	153209891	153213693	321
8	116031269	116032714	321
14	81890901	81903347	321
17	14135516	14137209	321
18	42350384	42352993	321
2	3164459	3166369	322
6	47702014	47705208	322
7	76032659	76037472	322
16	47283906	47286797	322
2	8353011	8355495	323
2	49892269	49899950	323
3	56761683	56763087	323
7	21024262	21025671	323
7	30307007	30308703	323
14	29067187	29069822	323
1	190168419	190172212	324
5	14805623	14807926	324
6	48986361	48990480	324
10	23220584	23223809	324
17	28678208	28679530	324
18	51037481	51039322	324
1	269258670	269261355	325
3	68540069	68541308	325
9	122649775	122652219	325
17	5595722	5598509	325
3	28577398	28579151	326
5	8760889	8763522	326
6	106313171	106316523	326
13	97013263	97016297	326
14	37580689	37587259	326
1	163168758	163170971	327
[truncated: 604 more rows]

## Sheet: Overlapped H3K27ac peaks in VAT
Chromosome	Start site	End site	Number of overlapped base
3	8468269	8469153	10
6	59445146	59450491	10
6	67604455	67605511	10
13	123928888	123930131	13
6	67605862	67606960	14
13	47743534	47744478	14
8	30462874	30463578	18
3	103248207	103249470	19
4	93323274	93325336	19
9	106963360	106965637	19
14	77403225	77405026	19
18	42410873	42411427	20
12	11804521	11805203	22
12	16810830	16813382	22
X	16448386	16449595	22
8	43745882	43746542	24
10	39797792	39798247	25
14	22654536	22656075	25
7	36410596	36411844	28
12	35431798	35433125	29
6	164195956	164197339	30
2	5357914	5359619	31
6	49662542	49665532	32
15	110872782	110873836	33
17	30350406	30350977	33
4	83772809	83776456	34
4	90722346	90724632	38
9	131073431	131076387	38
3	103249779	103251461	39
8	1627099	1628392	40
3	40091705	40092297	41
1	219810680	219815361	42
6	453393	455507	42
10	13711483	13712545	42
12	25969282	25971427	44
2	46025437	46026118	45
5	21373292	21374837	45
7	29693586	29694458	47
13	53699969	53700377	48
2	105046800	105048209	49
1	265866206	265867110	56
3	18609927	18611076	60
3	40092621	40093947	60
14	39578525	39579813	60
7	32785900	32787897	62
6	55989158	55991393	64
9	52301792	52302719	64
12	37729072	37730873	65
5	64058777	64060234	67
12	52901539	52903562	71
5	7085574	7090559	73
8	12590489	12595021	75
2	81307671	81308723	77
X	43327689	43329498	77
2	61450810	61453092	78
7	81669824	81670982	81
2	7923466	7924861	82
1	254249924	254253023	85
2	11876277	11877899	85
2	147789162	147791030	85
17	1212144	1215321	85
7	8093750	8095151	86
12	15349683	15350980	86
4	19143283	19146657	88
10	25634635	25635982	88
5	19484161	19486883	90
18	51038284	51039127	90
2	44375451	44376710	95
10	14597312	14598413	95
12	52954698	52956197	95
16	6145632	6146294	97
11	65229317	65229851	99
10	65265919	65267533	100
3	72544444	72545313	101
13	93306881	93313330	101
11	16372447	16375210	102
12	49917154	49918832	102
16	18696993	18697681	102
17	30351280	30352300	103
13	189294673	189295694	106
6	34119670	34121341	109
5	7777018	7778263	110
12	36111617	36112458	110
12	53376972	53378523	113
14	50976378	50978646	114
3	76837363	76840090	116
11	77269410	77270650	116
12	24154025	24169200	117
7	116787355	116788680	118
11	630150	630615	118
7	54905149	54906912	119
11	65230090	65231104	119
15	138657798	138658816	119
2	142166212	142167982	122
18	32798238	32799703	122
3	101957137	101958789	125
9	52726825	52728089	125
4	106656685	106657658	126
14	108723754	108724826	126
1	2541486	2542511	128
17	32562900	32564902	131
4	42930548	42931087	133
14	9514700	9517850	136
9	8513105	8514167	137
1	158641128	158641859	142
8	43744149	43745656	142
1	190526767	190527180	143
1	219207977	219210521	144
2	59408338	59409322	144
8	78854173	78856190	144
3	17634687	17635978	146
5	19522532	19524388	146
1	183792695	183793415	147
7	11521196	11524614	147
4	122783955	122784998	149
4	99711229	99712281	152
3	57423956	57424947	155
13	200924543	200926094	155
10	11835670	11836229	156
12	51947007	51949328	160
5	14805582	14806903	163
14	34322073	34324028	164
2	5355303	5357663	165
2	16612896	16620405	165
6	464620	466759	165
6	119719282	119719729	167
14	77405337	77406881	169
8	105121388	105122319	170
1	271320259	271322009	175
2	140502771	140504362	179
9	106965992	106968122	186
6	70241773	70242546	190
3	59166010	59167898	191
13	95743603	95745601	191
14	38698687	38700197	195
14	113497624	113498798	195
2	69335156	69339918	197
15	30731266	30731921	197
1	267925182	267926287	198
1	9254431	9260540	199
1	20976526	20984306	199
1	37168563	37169548	199
1	51232167	51232739	199
1	54632340	54634344	199
1	74625772	74631429	199
1	159018250	159024488	199
1	162259047	162261618	199
1	179610026	179612349	199
1	180933769	180935201	199
1	189622106	189624609	199
1	194351080	194354171	199
1	223751243	223758906	199
1	251163138	251166949	199
1	261254887	261257583	199
1	270760875	270764112	199
2	11688740	11690343	199
2	26094129	26096472	199
2	59275588	59279701	199
2	67906935	67908599	199
2	74625973	74628237	199
2	78875361	78877621	199
2	84535676	84539265	199
2	97646276	97649104	199
2	123156994	123160919	199
2	143688151	143691515	199
3	4642443	4644838	199
3	8529897	8532826	199
3	8841863	8847144	199
3	17106666	17110550	199
3	28576227	28576796	199
3	37553501	37556670	199
3	37928071	37930262	199
3	42632265	42636239	199
3	43454215	43456555	199
3	47337946	47339647	199
3	77738651	77743805	199
3	86110741	86112166	199
3	86178914	86183854	199
3	112272220	112273349	199
3	119453329	119455393	199
4	180059	181736	199
4	8485573	8486963	199
4	14292417	14299779	199
4	35974924	35978905	199
4	41655039	41656974	199
4	68119093	68120913	199
4	79935064	79947598	199
4	90460591	90462932	199
4	97368399	97369568	199
4	99996386	99999260	199
4	108003948	108013993	199
4	109784657	109788631	199
5	13980966	13983990	199
5	14358069	14359978	199
5	61336815	61340503	199
5	64166457	64168024	199
5	67105142	67107565	199
5	90936208	90937161	199
6	18900011	18903887	199
6	32012625	32015294	199
6	37942815	37944990	199
6	39372723	39374128	199
6	48711186	48714804	199
6	49838620	49841528	199
6	54551800	54554542	199
6	54680506	54687516	199
6	69933714	69936075	199
6	77637507	77639150	199
6	85306741	85308442	199
6	88659214	88661249	199
6	96007586	96009489	199
6	165233266	165241871	199
6	165846382	165849266	199
6	168734359	168737384	199
7	28660491	28661146	199
7	29084145	29084801	199
7	30665624	30668000	199
7	31791616	31796370	199
7	57040549	57041853	199
7	69527115	69529557	199
7	77718584	77720570	199
7	92362495	92366036	199
7	98202870	98204594	199
7	104007280	104011180	199
7	112159870	112166109	199
8	29452687	29453581	199
8	47607461	47609675	199
8	55930670	55931522	199
8	104559661	104561278	199
8	110088861	110090245	199
9	103317	106769	199
9	8760385	8762666	199
9	45325268	45338689	199
9	46589643	46591161	199
9	65064177	65067329	199
9	71894889	71896746	199
9	90336058	90338265	199
9	127538607	127541647	199
10	12431012	12432586	199
10	15263546	15265347	199
10	25201721	25203368	199
10	29065193	29069501	199
10	43928436	43929917	199
10	55697128	55702644	199
10	57827287	57832522	199
11	7756772	7760675	199
11	15407615	15412466	199
11	22143549	22146483	199
12	160614	163240	199
12	3641858	3646655	199
12	5709570	5718116	199
12	20220167	20222105	199
12	24350464	24354904	199
12	33375164	33377433	199
12	38072771	38076014	199
12	42528707	42529918	199
12	45503933	45508232	199
12	47816496	47820600	199
12	56384142	56385744	199
13	21876829	21879396	199
13	26667417	26674739	199
13	42883574	42885274	199
13	68656159	68658834	199
13	71957125	71958454	199
13	84632940	84637068	199
13	97008810	97016600	199
13	108435025	108436858	199
13	202895474	202897882	199
14	7388429	7391202	199
14	30498003	30499853	199
14	59406650	59411378	199
14	76834832	76836673	199
14	110635153	110636935	199
14	113889888	113891046	199
14	131988275	131988622	199
14	132523200	132523826	199
15	1715363	1717820	199
15	44491052	44493413	199
15	72511437	72512866	199
15	78852669	78853505	199
15	88375439	88377309	199
15	103492660	103495201	199
15	120588956	120592013	199
16	27813435	27815639	199
16	27955583	27957304	199
16	34701156	34703531	199
16	55312031	55314973	199
17	22356717	22358094	199
17	47296490	47299562	199
17	52194230	52195711	199
17	54960020	54960973	199
18	50683437	50686179	199
18	50758490	50760325	199
X	43613637	43614644	199
1	164752752	164755471	200
2	6043007	6044355	200
2	69412393	69415956	200
7	96405662	96408029	200
8	110200353	110201524	200
9	39367867	39370270	200
15	68983414	68988500	200
2	144755827	144756354	201
14	132089570	132093045	201
1	165191815	165193581	202
1	181994807	181996912	202
2	52309705	52313021	202
3	128902122	128904906	202
13	32318427	32321039	202
14	32841113	32842621	202
14	109007338	109009685	202
17	10690870	10691413	202
3	56276284	56279310	203
3	97197703	97208285	203
4	34427463	34432475	203
6	87683490	87688097	203
12	27368963	27371572	203
13	77178111	77183002	203
15	31941924	31948491	203
15	39712301	39714420	203
3	69205638	69207229	204
5	18264933	18267698	204
14	112398190	112400140	204
16	49047821	49050347	204
1	165053970	165061190	205
4	31254051	31255844	205
5	715854	719896	205
7	13845545	13847332	205
14	47798866	47800934	205
2	103566508	103571070	206
3	16392728	16394626	206
5	63706790	63709012	206
7	88571476	88580177	206
9	105387576	105389391	206
13	153479636	153485067	206
14	115173212	115174932	206
15	47664723	47666271	206
15	67970492	67972518	206
1	228090839	228092946	207
3	8853778	8857696	207
3	93370878	93375500	207
6	100090075	100095217	207
10	69293198	69297186	207
12	23721393	23724053	207
13	32444264	32445882	207
13	133559354	133561660	207
14	101163774	101165859	207
3	31375342	31378191	208
3	58353091	58356022	208
4	111005668	111008073	208
7	89165839	89169172	208
7	90345655	90348344	208
10	24464636	24465859	208
5	18337194	18340031	209
6	1626212	1628187	209
6	28194362	28197942	209
17	47386739	47393180	209
1	194438194	194440750	210
2	26531628	26534752	210
2	58512382	58518990	210
7	56539266	56541406	210
1	222118972	222121029	211
1	268262911	268267308	211
3	126256242	126257014	211
7	104188789	104190186	211
8	39611075	39612901	211
15	91603814	91606608	211
16	25802167	25805013	211
1	165088869	165090366	212
4	51468094	51469906	212
6	50373493	50375251	212
13	134352309	134354193	212
15	132208402	132210731	212
5	57748699	57751120	213
6	153882044	153883852	213
15	3524925	3526749	213
X	41088974	41090636	213
1	16138299	16140295	214
2	59945257	59947333	214
8	76269075	76271483	214
9	116401674	116403486	214
10	30974134	30977251	214
14	74779665	74783280	214
17	26718611	26720402	214
18	48692822	48694205	214
7	55811019	55812872	215
8	84222464	84225894	215
9	109383596	109386317	215
2	77322505	77326004	216
3	56810127	56814707	216
12	11715253	11716773	216
2	117837612	117838955	217
6	95321353	95322369	217
8	130465806	130468107	217
7	116435200	116438368	218
13	68545536	68547665	218
2	4523205	4525046	219
6	77706642	77708799	219
2	89043663	89047460	220
4	109096690	109097667	220
5	7105822	7113552	220
1	165436175	165438322	222
3	80745426	80746287	222
5	39361920	39364634	222
14	7355696	7360093	222
14	51705732	51706009	222
6	47251966	47253447	223
7	113146462	113150670	223
9	108318440	108320876	223
12	15190856	15193453	223
1	184400755	184403612	224
5	21393690	21396528	224
6	146268482	146279701	224
9	32810525	32813484	224
10	12688224	12690223	224
8	40145007	40147451	225
10	20966175	20967866	225
13	100441158	100443991	225
17	38513560	38516478	225
1	127123895	127126539	226
9	112931123	112933104	226
14	109046627	109054967	226
3	97829254	97830959	227
4	108859787	108864022	227
6	54878577	54884759	227
10	12555248	12555867	227
6	101755949	101759216	228
6	164207083	164208862	228
13	131306825	131308277	228
14	129465460	129468150	228
2	5212197	5213353	229
3	58094160	58097998	229
6	29338567	29340843	229
7	96796186	96798588	229
10	65107702	65110213	229
12	23804276	23806696	229
12	47528531	47530775	229
X	20220279	20225926	229
1	194351080	194354171	230
2	5024914	5030829	230
2	9162396	9164909	230
5	13394666	13398625	230
6	48053180	48069160	230
7	112144271	112148769	230
18	50486107	50488645	230
1	103793425	103796914	231
3	115162742	115165749	231
5	89726847	89728981	231
6	58499229	58502974	231
10	30974134	30977251	231
3	38062968	38064411	232
3	59201602	59203715	232
3	111066191	111069619	232
6	85184903	85186981	232
9	44469311	44475092	232
9	46275426	46277954	233
14	29658120	29660496	233
1	268933472	268937352	234
5	756346	759121	234
13	199996382	200000473	234
16	36215626	36219343	234
16	74269644	74271831	234
4	64710062	64712347	235
6	53063986	53067942	235
6	144953883	144956072	235
8	95948203	95951277	235
13	18648638	18651595	235
14	55448912	55453113	235
4	107415539	107417449	236
4	130642486	130646799	236
6	43164056	43169787	236
7	116740050	116742486	236
14	32620518	32629791	236
3	45887411	45888780	237
3	47758176	47759918	237
6	63354220	63357412	237
10	47608429	47610007	237
13	90969675	90972522	237
4	95941440	95945877	239
7	61112984	61114934	239
14	75095581	75122109	239
13	77747769	77752961	240
1	92420079	92423486	241
15	81804002	81806390	241
2	48665440	48668294	242
4	28012096	28014996	242
8	135843159	135847063	242
12	47060455	47061982	242
2	137037290	137039561	243
3	55582739	55585337	243
6	52934379	52940435	243
1	262354114	262356993	244
5	4218072	4220516	244
3	56609749	56612044	245
9	82224707	82227518	245
1	234368404	234371353	246
3	5116704	5119072	246
12	27368963	27371572	246
3	19607365	19612465	247
3	111324453	111329552	247
7	75948513	75952814	247
12	19786369	19789817	247
17	40774684	40775568	247
4	99337546	99367945	248
13	33656787	33660076	248
2	134091723	134094286	249
3	71361488	71362895	249
8	135430704	135433456	249
14	14040734	14042402	249
15	44885693	44888869	249
6	83685203	83690755	250
9	35902810	35904802	250
15	4094686	4097295	250
9	81836774	81839172	251
13	80263686	80265734	251
15	101208922	101211908	251
12	52867566	52870169	252
1	40179128	40181128	253
15	56437336	56439041	253
15	101371574	101375445	253
1	228140907	228145563	254
4	34644770	34648881	254
13	134717544	134720478	254
1	8934168	8936771	255
14	48541990	48547959	255
14	61652406	61656308	255
14	67152527	67162605	256
15	54721829	54729390	256
1	141886018	141888567	257
14	59190674	59193459	257
17	30327963	30331910	257
8	136555127	136559521	259
15	83004482	83010852	259
3	92335095	92337013	260
3	31131784	31134140	261
5	56735496	56737516	262
6	31745731	31748701	262
6	36357924	36363129	262
10	32159678	32162483	262
14	40454955	40457728	262
15	133179977	133181763	262
1	239491277	239493735	263
2	64760260	64763444	263
8	86689612	86691340	263
10	56155699	56159900	263
1	138338829	138343471	264
2	95016970	95019341	264
4	46911245	46913296	264
8	3795189	3798984	264
13	140133315	140138648	264
13	151428210	151432230	264
13	159191512	159192510	264
15	76135076	76137002	264
9	104906929	104916524	265
18	553336	557212	265
18	4967894	4971209	265
2	77560714	77565473	266
9	51917874	51920180	266
5	63938438	63945441	267
5	79354566	79357117	267
7	57500915	57505757	267
10	42691687	42694022	267
15	24894101	24897504	267
6	74969912	74973496	268
12	3986802	3989812	268
1	18511919	18514205	269
1	265933656	265936708	269
14	12195928	12198940	269
9	68507691	68510789	270
2	140530685	140533269	271
4	130297576	130299248	271
15	82956774	82959770	271
17	52376298	52378363	271
2	130443128	130444797	272
3	112921684	112925486	272
5	79492113	79494492	272
3	93853062	93855486	273
6	59723865	59727529	273
8	96854712	96856821	273
9	75257455	75262224	273
4	3025001	3031928	274
2	61338480	61352423	275
6	166644487	166646689	275
14	28245540	28258081	275
18	19873395	19876847	275
1	268364411	268366370	276
3	7172972	7175334	276
3	107507469	107509783	276
4	111292384	111294475	276
5	90130989	90132942	276
7	76431244	76432611	276
2	135281611	135285229	278
12	5563734	5566898	278
4	83068346	83072168	279
16	40101483	40107901	279
1	181680662	181682249	280
7	86101867	86108241	281
10	13895662	13899527	281
15	101389546	101392273	281
17	5596293	5598777	281
5	69778350	69780308	282
1	34692659	34695516	283
3	46545334	46548678	284
14	2597549	2604996	284
16	34701156	34703531	284
5	18877571	18880480	285
10	24922309	24925032	285
12	17210865	17212115	285
1	190202041	190212986	286
2	36883891	36885923	286
9	19608067	19610202	286
1	90649738	90652181	287
1	253091143	253094119	287
2	13274765	13278007	287
4	34822756	34824790	287
7	100118100	100141048	287
12	14763490	14766371	287
9	117062528	117065130	288
1	99938963	99941500	289
1	169914101	169917997	289
4	21214862	21216277	289
3	19549263	19567248	290
7	75179436	75184920	290
10	19869711	19870919	290
17	14474341	14477145	290
2	8360003	8363835	291
13	29994693	29997752	291
14	45995000	45997105	291
14	92381714	92385364	291
9	33039045	33042879	292
14	61046908	61049917	292
5	48553429	48556684	293
6	51444119	51446943	293
6	98596241	98599597	294
9	105983755	105986499	294
13	173633353	173637478	294
X	54615600	54617344	294
4	99224663	99227556	295
2	58266763	58269603	296
1	77158523	77160151	298
12	51526674	51528522	298
3	47599862	47602518	299
4	81508750	81511455	299
13	125780214	125784756	299
4	89106229	89110616	300
5	67304201	67307000	300
1	44238220	44240477	301
13	18556530	18558914	301
X	46440387	46441799	301
1	248447157	248450518	303
4	35765924	35769753	303
6	128029985	128031310	303
12	1204611	1207174	303
14	61686623	61690460	303
1	189246979	189250705	304
1	113084330	113087443	305
2	126271201	126273401	305
13	39088070	39090699	305
13	140757666	140760633	305
9	87084526	87088951	306
16	5712849	5714550	306
18	8254805	8256070	306
1	202258130	202259528	307
2	26826067	26827969	308
4	100424950	100427288	308
5	15615596	15622048	308
6	75013466	75019075	308
9	88784689	88785905	310
1	82160229	82163193	311
9	19592836	19595720	311
13	73899923	73901577	312
5	76634255	76639837	313
8	99781653	99783884	313
9	36619325	36621731	313
3	80253328	80258349	315
2	141877739	141880628	316
1	43391969	43394003	317
6	62967009	62969311	319
14	76863534	76864863	319
X	46093956	46094995	319
1	128806895	128810411	320
2	49891791	49903106	320
3	46545334	46548678	321
5	62545370	62547954	321
13	160063686	160065240	321
14	115216685	115219263	322
8	29189157	29190572	324
17	50867590	50869970	324
3	9990926	9996051	326
1	216998995	217004082	327
6	54680506	54687516	327
13	30600982	30603087	328
1	96728360	96730440	329
1	77398405	77403601	330
6	158262008	158264194	331
10	39875325	39875656	331
17	17914291	17917283	331
X	12223443	12225755	331
10	25706109	25709937	332
12	52657797	52662238	333
14	51341195	51344083	333
13	197090910	197094105	334
3	22739964	22741396	335
3	80253328	80258349	335
13	90759707	90762319	336
1	216114405	216116907	337
3	42021312	42023236	339
6	82307322	82310686	342
13	148087221	148088037	342
14	72209537	72211889	342
13	147775139	147776628	343
3	41343097	41345763	345
13	40209637	40212328	346
1	163788539	163791652	350
3	26653341	26655609	352
8	1386462	1389148	354
13	96999884	97004543	355
1	169670152	169672395	356
7	28764218	28766075	356
7	120485539	120488142	357
15	124741379	124743066	357
7	47528231	47530678	360
12	14570589	14574051	360
1	21230098	21232077	361
4	103375389	103378393	361
13	127571167	127572299	362
15	16204877	16207385	365
7	38568178	38571358	366
8	30757685	30761283	367
13	158727983	158730262	367
3	85648470	85651382	369
6	64204057	64210041	370
17	46744641	46746882	372
18	33219195	33223217	376
9	131076727	131077668	380
17	59173044	59175084	384
14	75916751	75920680	386
13	140565375	140568795	389
16	51343166	51359510	390
2	119719628	119724202	394
5	35691082	35692650	395
1	182421787	182424662	401
13	25163355	25165894	403
7	98820871	98823024	405
6	83979992	83984586	406
16	46432798	46436925	407
X	36987881	36992332	409
7	76032922	76037481	411
8	30838696	30841659	413
9	93306503	93311793	416
12	194926	202590	416
2	105200916	105204257	418
17	31826871	31830034	424
6	53273732	53276332	425
8	80302499	80306114	425
2	150659523	150664919	426
8	102386612	102391168	429
12	34770161	34773835	432
2	87776767	87779406	433
13	167894185	167897083	440
15	63591785	63594628	448
18	36583118	36585641	451
1	190623999	190626931	452
1	252650982	252654048	455
6	170761875	170763909	459
1	207251466	207253287	473
13	77178111	77183002	481
4	15179456	15183897	484
11	18516578	18520797	491
15	101336568	101340095	501
15	59452784	59455115	503
X	16311530	16313029	507
9	106160466	106163740	508
2	113773098	113775426	539
7	98425601	98442125	564
12	20795194	20798247	596
3	77191103	77195001	695
