# Supplementary material for: Chromatin accessibility landscape of stromal subpopulations reveals distinct metabolic and inflammatory features of porcine subcutaneous and visceral adipose tissue
Source: PeerJ. 2022 May 24;10:e13250. doi: 10.7717/peerj.13250 (PMC9138157; doi:10.7717/peerj.13250)
Supplement: Supplemental Information 6 [file peerj-10-13250-s006.xlsx]

## Sheet: Sheet1
Sample name	Raw reads	Clean reads	Clean reads/Raw reads	Unique mapped	Multiple mapped	Total mapped	Sequencing depth
STA_1	42909980	42825182	0.998024	38377588 (89.61%)	1023747 (2.39%)	39401335 (92.00%)	2.6
VAT_1	39977726	39730038	0.993804	34977528 (88.04%)	1611036 (4.05%)	36588564 (92.09%)	2.41
STA_2	41229645	41184556	0.998906	36488244 (88.60%)	1319314 (3.20%)	37807558 (91.80%)	2.5
VAT_2	42833992	42548810	0.993342	36901078 (86.73%)	2020373 (4.75%)	38921451 (91.47%)	2.58
