# Supplementary material for: Chromatin accessibility landscape of stromal subpopulations reveals distinct metabolic and inflammatory features of porcine subcutaneous and visceral adipose tissue
Source: PeerJ. 2022 May 24;10:e13250. doi: 10.7717/peerj.13250 (PMC9138157; doi:10.7717/peerj.13250)
Supplement: Supplemental Information 7 [file peerj-10-13250-s007.xlsx]

## Sheet: Up-regulated genes in SAT
Up-regulated genes in SAT
TTC38
TEX49
NCKAP5L
ESPL1
LRIG3
GLIPR1
BICD1
ARNTL2
USP5
NCAPD2
IFFO1
KCNA1
RAD51AP1
TULP3
FOXM1
CECR2
KERA
LMF2
MLC1
ELOVL2
MYLIP
RNF144B
PPT2
EGFL8
AGPAT1
RNF5
HMGCLL1
MLIP
COL21A1
KIFC1
CMTR1
SLC29A1
RCAN2
CFAP161
UROC1
RLBP1
SNX33
MAN2C1
STOML1
CBLN3
REC8
ABHD4
RPGRIP1
SV2B
SLCO3A1
SMOC1
PAPLN
PSMC1
NRDE2
GOLGA5
PLD4
ZDHHC7
VAT1L
DHX38
NQO1
IRX3
SHCBP1
PLEKHF1
ATP4A
HAUS5
CYP2A19
CBLC
FOXA3
STRN4
NAPA
RNF207
TAS1R1
SLC2A7
PIK3CD
PGD
MAD2L2
KIAA2013
SPATA21
COL16A1
CLSPN
NDC80
GREB1L
GAREM1
KIAA1328
SSX2IP
CTH
SRSF11
PDE4B
TACSTD2
LRP8
ECHDC2
CYP4B1
MKNK1
KIF2C
RIMKLA
ERMARD
FNDC1
IYD
BCLAF1
SMPDL3A
SMIM8
C6orf163
MMS22L
FBXL4
TRAF3IP2
TTK
SLC17A5
CTIF
ACAA2
PCLAF
SLTM
FAM214A
CEP152
MAP1A
VPS39
CERS3
MAGEL2
MTMR10
NFATC1
ATP9B
NEDD4L
NID2
ATG14
C14orf39
SIX1
PLAA
PSAT1
PIGO
ARHGEF39
MELK
IGFBPL1
SAL1
ZNF618
C5
LHX2
GARNL3
ZER1
CRAT
PRRX2
FUBP3
PLPP7
GFI1B
COL5A1
LCN10
FBXL6
TMEM249
MAL2
ANGPT1
CALB1
STMN2
PKIA
TERF1
PENK
MGST3
MPZ
CRABP2
TMEM79
RXFP4
AQP10
S100A4
ZNF687
PHGDH
PTGFRN
SLC16A1
BCAR3
MICU3
VPS37A
GPAT4
SIGLEC1
LZTS3
CPXM1
SIRPB2
ANGPT4
SCAND1
FAM83D
EMILIN3
LPIN3
MYBL2
UBE2C
SULF2
ZBP1
APCDD1L
SYCP2
FSCN1
PMS2
BAIAP2L1
GUSB
PHKG1
C16orf58
PHKG2
SPNS1
CRYM
ZP2
ABAT
SEC14L5
CLUAP1
NPRL3
RPUSD1
PRSS27
ZC3H6
FBLN7
TMEM182
KDM3A
CYP26B1
KCNK12
SIX2
PLEKHH2
MAP4K3
CRIM1
SRD5A2
RNF144A
NCAPG
FAM114A1
SLC10A4
GASK1B
ETFDH
PPAT
CRACD
RNF150
NAP1L5
IBSP
HPSE
WASF3
RXFP2
POSTN
NEK3
DIAPH3
SCEL
SLITRK6
SLC15A1
S1PR3
GFRA2
FAM160B2
PEBP4
ADAMDEC1
EPHX2
ZNF395
HMGB2
MFAP3L
SH3RF1
ULK1
SFSWAP
FZD10
AACS
NCOR2
CCDC62
HCAR1
B3GNT4
BCL7A
MORN3
SRRM4
RFC5
FBXO21
PLBD2
DTX1
MAPKAPK5
SEZ6L
EWSR1
PIK3IP1
PISD
P2RX6
SLC7A4
TANGO2
RYR2
TSNAX
EGLN1
RASGEF1A
ZNF365
AIFM2
MSS51
CAMK2G
KCNMA1
GDF10
MARCHF8
KIF11
HPSE2
SCD
SORCS3
NRAP
TRUB1
WDR11
FGFR2
EBF3
TGFB2
MARC2
DUSP10
COQ8A
ASPM
KIF14
SPINK4
JCAD
MASTL
ARMC4
ECHDC3
PRXL2C
SGO1
NEK10
DCLK3
DLEC1
ACAA1
KLHL40
MYL3
C3orf84
PHF7
HMCES
AMOTL2
ZIC1
ZIC4
P2RY14
MME
CLDN11
USP13
PEX5L
RFC4
MASP1
TPRG1
APOD
DRD3
CCDC80
ZPLD1
COL8A1
CADM2
NCAM2
CBR3
CHAF1B
EGFL6
GPM6B
CCDC120
TSPYL2
TNMD
RNF128
TRPC5
TMEM255A
GRIA3
TENM1
MTMR1
GABRE
HAUS7
IDH3G
LTO1
PC
CCDC87
SLC25A45
SCGB1A1
INCENP
SPI1
CRY2
CHST1
E2F8
KCNC1
AZU1
PRTN3
PWWP3A
DOT1L
CHAF1A
UHRF1
MCOLN1
STXBP2
MYO1F
BEST2
NFIX
ASF1B
ADGRL1
FKBP8
ZNF672
PHYKPL
B4GALT7
RGS14
UNC5A
SFXN1
ANKRA2
THBS4
SLCO6A1
TMEM232
CDO1
ARL14EPL
CDKL3
CXCL14
KIF20A
BRD8
SLC35A4
PDE6A
TRIM66
LAMTOR1
ANAPC15
UCP3
P4HA3
SLCO2B1
TSKU
DDIAS
AMOTL1
FAM76B
ANGPTL5
LAYN
DLAT
DRD2
REXO2
MPZL2
VPS11
RNF26
VSIG2
JAM3
STEAP4
SLC25A13
DGKB
AXDND1
RGS16
CENPF
DTL
NEK2
DPP10
EN1
STOX2
UNC5D
GSR
MYO7B
DAPL1
SCN9A
HOXD10
FRZB
COL3A1
SGO2
MARCHF4
COL4A4
HJURP
CHPF2
TMEM176A
PARP12
LRGUK
FOXP2
ADCYAP1R1
GHRHR
HOXA7
PGAM2
YKT6
EGFLAM
DAB2
FAT2
ADCY2
CYBC1
RAB40B
FAM20A
WIPI1
SLC16A6
CACNG1
KIF18B
ETV4
CNTNAP1
DNAJC7
HAP1
KRT24
TNS4
TOP2A
ZNF652
CHAD
RPA1
WSCD1
GLP2R
ND1
ND2
ND3
ND6
CYTB
ssc-mir-365-2
ssc-mir-214
SNORD21
HNRNPLL
OSGIN2
SOD1
LSS
RBM3
ZNF711
WBP2
METTL17
LGALS2
FAM124B
RASSF10
POU3F3
SLC25A16
RAB28
SLC3A2
COL6A1
BEX4
RINL
ERICH6
PDGFRB
PYGB
MCM5
ZNF408
GRIN2C
TROAP
RBM22
CENPE
SRXN1
UBALD2
SNORA70
KCNK2
PITHD1
FBRSL1
SERINC2
REEP1
SNRNP70
ZMIZ2
ATG2A
NEDD9
RECQL5
PRR11
CBX2
SGK2
RNASEH2B
KDM4B
ACP4
CLCN4
PFKFB1
TMEM181
SLC36A4
CYBRD1
ZNF358
NEGR1
G6PD
BORA
LGI4
ZNF628
DVL3
MCM3
MDH1
C2CD2
BOC
IGFBP5
FDFT1
DPP9
CMYA5
CCNF
ALDH3B2
SERTAD4
NCCRP1
PMAIP1
EML6
PRDM7
PLK1
DHX9
NID1
CDH18
TRAIP
LMNTD1
ENOSF1
TUBA8
PNPLA3
PTCH1
COL6A3
CBFA2T2
PCOLCE
KLF10
MYL5
CIR1
DHCR24
TNS1
MST1R
COL6A2
MUL1
ssc-mir-32
ARHGEF28
TM2D2
RBM25
MORN1
CTDSPL
MEF2A
IDI1
ELANE
MAPRE3
AJUBA
NAV3
CCNB1
ZNF205
PLSCR3
SLC16A2
PHRF1
SELENOM
ZBTB47
PIWIL2
C1QTNF6
BUB1
SSR3
HAPLN3
TCF7
INPP5K
C17orf67
ZBED1
RASD2
OPRL1
NIPAL2
ST8SIA1
LSP1
PRRX1
SYT13
ZNF462
SEPHS1
VMAC
REM2
TNNT3
KCNS3
ANKRD53
SHISA4
ST8SIA5
IRX2
ZNF362
IRX5
CDR2
VGLL3
ENGASE
SPOCK1
WFS1
SUV39H1
FAM240A
RTTN
EVC
PRR12
ACER3
GRINA
ATP6V1G1
PIM3
SRRM1
FAM168B
SULT2A1
SPATA2
RGS7BP
SREBF1
KLHL10
COL8A2
H1-4
TBXA2R
SMIM2
RNPEP
GTF2F2
NKX3-2
GNAO1
FIGN
MSX2
NPDC1
H2AC20
MGAM
GPIHBP1
CES5A
HOXD11
CAPN8
NT5C3B
MAML2
IRX1
STAR
CXCL12
IRF8
OR52W1
PID1
MYOC
INHBA
ADA2
SFRP4
ATP8A2
SLC36A1
ECT2
CATSPERE
ATAD5
LMX1B
DNAH17
KCNJ3
TBC1D20
GSAP
ssc-mir-9828-1
HIC2
ZNF740
BCO1
NKAIN2
POLQ
SRMS
SLC48A1
AKAP7
C6orf132
SNX4
CTNNBIP1
NR1D1
LRRC8B
EVL
MNT
FOXF2
SNX29
SIAH1
ADSS1
RNF220
GSN
H1-2
F2RL2
GNB4
SNORA73
GGH
KAZN
RGS5
FITM2
DIRAS1
COL18A1
RXRA
ZNF326
ZNF219
IKZF1
SP5
RAP2B
ADAMTS17
SPTBN2
TOM1L2
KLF11
TAF1D
SLC36A3
MAP7
ARHGAP33
RIMS3
SEC16B
H1-0
LRFN4
GAS2L2
CAMK2B
KNTC1
PTGFR
SLC2A5
EPN1
PRL
APCDD1
MARCHF5
PNRC1
CES1
PIGV
MTSS2
DLGAP3
HOXD8
TICRR
GPR19
HMG20B
RND3
C11orf58
IL34
CCL8
SLC26A9
WDR81

## Sheet: Up-regulated genes in VAT
Up-regulated genes in VAT
CACNA1I
DDX17
C22orf23
POLR3B
ACVRL1
ITGA5
PAN2
NAB2
HELB
CCT2
BEST3
PTPRB
PHLDA1
FAR2
PPFIBP1
ITPR2
KCNJ8
GYS2
RERG
ACRBP
FKBP4
WNT5B
ABCD2
PDZRN4
SLC38A2
WASHC4
HSP90B1
UTP20
TMCC3
ACSS3
ZNF322
ZNF165
UBD
DDX39B
CYP21A2
NOTCH4
LRRC1
DAXX
FKBP5
CLPS
LHFPL5
MAPK14
SRSF3
CPNE5
PI16
NFYA
CNPY3
RRP36
CRIP3
SLC25A27
WDR93
MESP2
ANPEP
LINGO1
BAZ1A
NPAS3
RIPK3
ADCY4
TINF2
JPH4
KLHL33
TEP1
GALNT16
ENTPD5
FOS
SPTLC2
AHSA1
GTF2A1
FBLN5
BDKRB1
KCTD19
LPCAT2
ANKRD27
SLC7A10
CD22
ZNF260
CNTD2
B9D2
TGFB1
ZNF283
SLC1A5
PRRG2
PRMT1
ZNF175
MYADM
PEG3
VWA1
DFFA
RSC1A1
FAM131C
EPHB2
LUZP1
MAP3K6
EYA3
LCK
HDAC1
FAM167B
MYOM1
GATA6
LAMA3
TAF4B
CDH2
MOCOS
ADGRL4
NEXN
AK5
SLC44A5
FPGT
PTGER3
LEPROT
ATG4C
NRDC
BEST4
CDC20
PDE10A
RGS17
SHPRH
UTRN
STX11
FUCA2
ADGRG6
PDE7B
ENPP1
ARHGAP18
KIAA0408
GJA1
MAN1A1
DCBLD1
KPNA5
ZUP1
RIMS1
TBX18
BACH2
SMPD2
PGM3
TENT5A
FILIP1
MTO1
ME2
CSNK1G1
TPM1
GCNT3
MYO1E
RNF111
ADAM10
LIPC
RAB27A
LEO1
TMOD3
ATP8B4
ZNF106
NDUFAF1
DLL4
THBS1
TTC23
ALDH1A3
CACHD1
UBE3A
CDH19
SERPINB8
ZCCHC2
TNFRSF11A
CCBE1
ATP8B1
MAP2K1
ITGA11
NOX5
NR2E3
HIF1A
SYNE2
WDR89
TEK
SNAPC3
PTPRD
UHRF2
IL33
RFX3
GCNT1
TLE1
FAM166B
TPM2
NR4A3
C9orf152
PAPPA
TRAF1
DAB2IP
PTGS1
HSPA5
PBX3
TTC16
SLC27A4
HMCN2
PCSK6
ARHGAP39
CCN4
FBXO32
SHAS2
COL14A1
CCN3
CTHRC1
VIRMA
GEM
CA3
HEY1
PI15
PREX2
PPP1R42
SGK3
SOX17
SPIDR
SELL
SELP
UAP1
LY9
OR6N2
OR6K6
CD1E
NES
UBQLN4
KHDC4
SYT11
FDPS
THBS3
INTS3
S100A14
S100A10
CTSS
ENSA
VPS45
GJA5
TENT5C
TRIM45
WNT2B
CTTNBP2NL
ADORA3
CHI3L2
CD53
WDR47
HENMT1
FAM102B
OLFM3
DPH5
CNN3
PKN2
CCN1
LONRF1
DLC1
PRNP
FERMT1
ESF1
SPEF1
C20orf194
KIAA1755
MATN4
ZSWIM3
B4GALT5
RIPOR3
ZNF217
BMP7
LFNG
NPTX2
SH2B2
GPRC5B
TMC7
SRL
ZNF200
FBXL16
TMEM204
ZNF484
EDAR
IL1R1
MGAT4A
POLR1A
SEMA4F
TTC31
UGP2
EHBP1
CCT4
CCDC85A
PPP4R3B
PREPL
PKDCC
SRSF7
FAM98A
LTBP1
TTC27
WDCP
OSR1
TAF1B
HGFAC
ADRA2C
LYAR
PCDH7
ATP8A1
FRYL
DCUN1D4
LRRC66
KLHL2
PPID
UBA6
AMBN
CXCL2
AREG
RCHY1
CXCL11
TLR2
SFRP2
ABCE1
SPRY1
KIAA1109
PDE5A
SYNPO2
RRH
METAP1
PDLIM5
THAP9
FLT1
HSPH1
CCNA1
KCNRG
SETDB2
CAB39L
CYSLTR2
RCBTB2
TSC22D1
DGKH
DACH1
EDNRB
SPRY2
DCT
UGGT2
RNF17
NFIL3
STMN4
HPGD
GALNT7
ZNF84
GOLGA3
ADGRD1
RSRC2
MLXIP
P2RX7
TBX3
RPH3A
DYNLL1
GAL3ST1
TCN2
SMTN
DRG1
YWHAH
ARV1
AGT
BMS1
RET
ARID5B
DDX50
VSIR
MCU
P4HA1
VCL
SGMS1
ANKRD22
ACTA2
SLC16A12
TNKS2
EXOC6
CYP26C1
MYOF
FFAR4
NOC3L
ENTPD1
ZNF518A
SLIT1
RRP12
PPRC1
ADRB1
GRK5
SEC23IP
DESI2
HNRNPU
NTRK2
CCL19
ARID3C
MINDY3
THNSL1
CREM
UPF2
HACL1
TBC1D5
SLC22A13
ZNF662
CLEC3B
ZNF660
RBM6
SEMA3F
SEMA3B
HYAL2
RASSF1
DCAF1
SEMA3G
ADAMTS9
CNTN4
THUMPD3
CAMK1
TADA3
CRELD1
PPARG
SLCO2A1
PAQR9
PLOD2
TM4SF18
TSC22D2
IGSF10
PTX3
SERPINI1
SKIL
PLD1
CCDC39
YEATS2
EIF4A2
TMEM44
SLC51A
PARP14
PLA1A
CD200R1
SLC35A5
DZIP3
ALCAM
ZBTB11
FILIP1L
ADAMTS1
MORC3
ASB9
VEGFD
RPS6KA3
ACOT9
SAT1
SRPX
USP9X
JADE3
SHROOM4
ALAS2
SNX12
OGT
CHM
CSTF2
ARMCX2
ACSL4
ZBTB33
LONRF3
BCORL1
ATP11C
AVPR2
F8
AIP
MUS81
PPP2R5B
MEN1
RASGRP2
PLCB3
PRR5L
CAPRIN1
QSER1
WT1
DKK3
GALNT18
EIF4G2
WEE1
ADAMTSL5
PLIN4
TRIP10
PNPLA6
KANK3
CNN1
DNMT1
TRIR
CALR
RFX1
ADGRE5
C19orf44
COLGALT1
GFPT2
FGFR4
ENC1
HMGCR
F2RL1
HOMER1
ZFYVE16
MSH3
ARSK
ERAP1
LVRN
MARCHF3
SLC27A6
KIF3A
HSPA4
KLHL3
PROB1
DND1
ARHGAP26
SH3RF2
LARS1
GRPEL2
HBB
C2CD3
RPS3
LRRC32
B3GNT6
EED
CCDC81
NOX4
CHORDC1
CCDC82
PGR
MMP27
PDGFD
SLC35F2
POGLUT3
TAGLN
HYOU1
MCAM
SORL1
UBASH3B
HSPA8
DCPS
ST3GAL4
KIRREL3
ETS1
ADAMTS15
B3GAT1
FMO4
FMO1
RBBP5
PDK4
COL28A1
AGMO
MEOX2
TSPAN13
ITGB8
RAPGEF5
TOMM7
DMTF1
DARS2
ANGPTL1
RALGPS2
FAM20B
IER5
LAMC2
SWT1
ANGEL2
VASH2
ATF3
INTS7
G0S2
GTDC1
PTPN4
ENPP6
TLR3
NRG1
ACVR1C
SCN3A
SCN7A
FASTKD1
DYNC1I2
ITGA4
CALCRL
NABP1
HSPD1
HSPE1
CLK1
TRAK2
ATF1
MAP2
IKZF2
DOCK10
NYAP2
EFHD1
GPC1
DENND2A
PTN
EXOC4
CEP41
FLNC
CCDC136
FAM71F1
WNT16
TSPAN12
CREB5
HOXA5
RAI14
LIFR
OSMR
C7
PELO
ITGA1
ARL15
MIER3
GPBP1
IPO11
ADAMTS6
BDP1
MAP1B
ZNF366
DUSP1
FGF18
SLIT3
ADAMTS16
NPTX1
AANAT
TRIM47
CDC42EP4
DCAF7
ITGB3
MEOX1
ARL4D
STAT3
HCRT
KAT2A
IGFBP4
PLXDC1
NPEPPS
CALCOCO2
DLX3
MMD
TMEM100
AP2B1
UTP6
RAB11FIP4
NUFIP2
SERPINF1
TP53
EIF4A1
ALOX12B
NTN1
MYH8
ZNF287
SNORD14
RNase_MRP
SNORD2
ssc-mir-193a
SNORD97
RNaseP_nuc
SCARNA13
EHD4
BANP
TRIOBP
PRSS57
TAF13
P4HA2
DYNLL2
IL6
BRWD1
FAR1
HOXA10
HIKESHI
GJC1
SOAT1
ZHX2
PHLDA2
EVA1C
STIP1
MROH2B
SCN2B
HEATR4
ARHGEF38
B3GALNT1
MDFIC
ZBTB38
SLITRK4
BRCA1
B3GALT6
ANKRD50
STK38L
NPL
MAT2A
TNFSF9
BLZF1
FEM1B
ZNF235
CBLB
STK39
USP14
PRMT2
CLTC
ZSCAN16
RAB20
HOXC10
PTER
CCSER1
TBC1D8B
JAM2
ATP2B2
SEMA7A
REXO4
SH3TC2
SRGN
TIA1
ITPR1
DNAJC9
PCSK5
TGM2
TMEM26
RAPGEF3
CHST3
MEPCE
CHIA
CLEC14A
AFAP1
CCDC9B
TRPC6
MMRN2
MINDY2
LYSMD3
TASOR
DCAF12
MYH13
RHOU
CEP83
ATAT1
GUCY1A2
ZNF667
TNFAIP1
MEGF6
GRIA2
PIBF1
FGF1
FMNL3
BRWD3
ZNF146
ALDH1A2
SMIM26
DOCK4
ATM
BCL10
SERPINE1
NOA1
DNAJC1
ADGRL3
ARHGAP31
HSPB11
ZBTB40
BBS12
KLB
RPL7L1
RALGAPA2
BATF3
CAVIN2
LMNB2
SCARNA12
SERTAD1
CASP10
SHCBP1L
DIPK2B
BDKRB2
PEX11A
FER
TNFRSF12A
SACM1L
PARD6B
PIK3CG
NCBP2
EIF1AD
GGCX
TCF23
TMTC1
GCA
BIRC3
ARL13B
RP2
DLL1
SHLD2
SAMHD1
GIMAP4
RRP15
TLR10
COG4
MRPL50
SLC9B2
XPO1
RHOBTB1
IL1R2
PAMR1
ACTG1
TMEM170A
LHFPL2
BTNL9
AMMECR1L
CAND1
PLOD3
IPO7
DIO1
UST
BMP3
RASIP1
DOK4
CCDC126
LDB2
NDNF
SPATA2L
C5AR1
ZFP30
P2RX3
PXDN
ZNF239
GPRC5A
FAM124A
PLCH2
CYTIP
TSPAN5
ZNF461
CEPT1
CD248
ZBTB16
UGDH
MAFF
DEDD2
TSC22D3
ZRSR2
ARHGEF3
GDI1
USP31
AHR
IGF1R
ZNF692
MYBPH
XBP1
FAM110D
SZRD1
HILPDA
ACKR2
LMOD1
MRPL57
CMKLR1
KBTBD6
KMT5B
HAND2
MFAP5
PTPRQ
NCDN
RAB3C
CBR2
DDIT4
CALHM5
ZFP82
SHANK3
SLC39A10
PTCH2
MYOCD
DUSP16
ZNF140
CPZ
GVQW3
RSPO1
CCDC117
ACP5
TCIM
CEBPD
ZFP90
NDUFB2
RGS1
KIAA0895L
FOSL2
CHRM2
GCM1
TNFRSF17
ZNF613
ALPL
SNAI1
SLC39A14
RBL2
TPPP
SMPX
MANF
CDH6
APH1B
GTF2A1L
CHMP7
IFNAR1
PALM2AKAP2
CD163
CMTR2
SAP30L
PDGFB
KCTD21
BAG2
ZNF793
GREM1
B3GALNT2
NIP7
NDST4
CYP1B1
DCLK1
RGS18
ZNF407
SLC5A3
CEBPB
RAG2
HES2
SPRY3
CYP8B1
MEX3C
RSRP1
PLEKHS1
KRBA1
JRKL
GDF6
RASSF9
NOVA2
C1QBP
ILDR2
SEMA6B
HIGD1C
UBE2S
F2R
IGFBP2
IWS1
RARRES2
HTD2
C11orf74
KITLG
SMARCAL1
HMCN1
GABRB1
ZBTB45
G3BP1
ERRFI1
PBRM1
UBE2QL1
TAL1
PTPRF
JDP2
P2RY8
JMJD6
DPT
FDX1
TGFB1I1
LSM6
TPPP3
EHD3
TACR1
SLC26A10
THRB
GIPC3
NPR3
FGF2
ACKR1
VASP
FAM126B
SLC8A1
GPX3
GJB6
DPYSL3
USHBP1
ZNF394
SORBS2
RPH3AL
PITX1
ALX1
HSPA12A
ZNF654
EMP2
TMEM88
FSTL3
GPR4
ZNF248
TLNRD1
RPRM
RGS2
RFK
CLIC5
CDK19
COL6A6
C3orf18
NEDD4
MAP3K11
MNDA
ITPRIPL1
SLF2
LRRC70
PKNOX1
C17orf98
COX7A1
NIT1
SOX18
CCND1
IL17RB
CYYR1
ZNF891
TOB2
RBM14
EMCN
IRF2BP2
CMTM3
CNTN6
CCL21
ADAMTS3
PRKRA
TMEM185B
ssc-mir-6782
SCARNA7
GABRB3
ZFP36L2
DOCK6
INHBB
PAFAH2
CCND2
MBP
NPNT
PCDH9
ST3GAL2
TM2D1
PPM1K
KLF2
HERC4
CTSF
SLC17A8
ZNF467
TRIB2
MEIS1
RAB25
TCN1
SHLD1
MCL1
SUGT1
SERPINH1
STXBP5L
ZNF470
KCNJ2
HSPB1
THAP1
FAM155A
ZNF862
RPL35A
TES
NDE1
SCARNA10
SERTM1
CASKIN2
ZNF683
CISH
TMEM140
CDH8
DBN1
NIPA1
MRPS21
PYCARD
DCC
NMRK2
